# Supplementary material for: Persistent guaiazulene arylmethylium ions as electrophilic traps for metal enolates
Source: Royal Society of Chemistry journal article supplement (doi:10.1039/d4cc00208c), 2024-01-01
Supplement: d4cc00208c1.pdf [file d4cc00208c1.pdf]

## Electronic Supplementary Information

# Persistent guaiazulene arylmethylium ions as electrophilic traps for metal enolates

Péter Kisszékelyi,<sup>a</sup> Brigita Mudráková,<sup>a</sup> Marek Cigáň,<sup>a</sup> and Radovan Šebesta<sup>\*a</sup>

<sup>a</sup> Comenius University Bratislava, Faculty of Natural Sciences, Department of Organic Chemistry, Mlynská dolina, Ilkovičova 6, 842 15 Bratislava, Slovakia.

## Table of Contents

|                                                                                                       |            |
|-------------------------------------------------------------------------------------------------------|------------|
| <b>1. General information</b> .....                                                                   | <b>2</b>   |
| <b>2. General procedure for the preparation of guaiazulene-stabilized carbocations</b> .....          | <b>3</b>   |
| <b>3. Enolate trapping reactions – study of reaction conditions and other Michael acceptors</b> ..... | <b>4</b>   |
| <b>4. Reaction procedures for the enolate trapping reactions</b> .....                                | <b>6</b>   |
| <b>5. Scale-up reaction</b> .....                                                                     | <b>7</b>   |
| <b>6. Characterization data</b> .....                                                                 | <b>9</b>   |
| <b>6.1. Carbocations</b> .....                                                                        | <b>9</b>   |
| <b>6.2. Products of tandem conjugate addition and enolate trapping</b> .....                          | <b>14</b>  |
| <b>6.3. Products of silyl enol ether trapping</b> .....                                               | <b>27</b>  |
| <b>7. NMR spectra</b> .....                                                                           | <b>31</b>  |
| <b>8. HPLC chromatograms</b> .....                                                                    | <b>85</b>  |
| <b>9. HRMS pictures</b> .....                                                                         | <b>96</b>  |
| <b>10. Spectroscopic study</b> .....                                                                  | <b>129</b> |
| <b>11. Computational study</b> .....                                                                  | <b>132</b> |

## 1. General information

If otherwise not noted, chemicals were purchased from commercial sources (Merck, ThermoFischer, TCI) and used without further purification. Reactions were carried out under Ar atmosphere using oven dried glassware and using standard Schlenk techniques. Solvents were purified by standard methods.

NMR spectra were recorded with Varian NMR System 600 instruments (600 MHz for  $^1\text{H}$ , 150 MHz for  $^{13}\text{C}$ ) and Bruker Ascend (400 MHz for  $^1\text{H}$ , 100 MHz for  $^{13}\text{C}$ ). Chemical shifts ( $\delta$ ) are given in ppm relative to tetramethylsilane.

Compounds were purified by flash chromatography using Isolera Biotage FSKO-1107-0010 or Büchi Pure C-810 Flash systems. Thin-layer chromatography was performed on Merck TLC-plates silica gel 60, F-254.

High-resolution mass spectroscopy was measured by using Orbitrap Thermo Scientific Velos pro with heated electrospray ionization (capillary temperature 350 °C, source heater temperature 300 °C, mass range 80–600 m/z, full scan, positive polarity, resolution 120000).

FT-IR spectra were recorded with Agilent Technologies Cary 630 spectrometer by ATR technique and reported in wave numbers ( $\text{cm}^{-1}$ ).

Enantiomeric purities were determined by Chiralcel and Chiralpak (Daicel Chemical Industries Ltd.) columns on HPLC Agilent Technologies 1200 Infinity series using Chemstation software for LC systems.

Melting points were measured using a Melting Point M-656 apparatus (Büchi).

The ligands used in this work were prepared following a literature procedure, except **L4** which was bought from commercial source.<sup>1</sup>

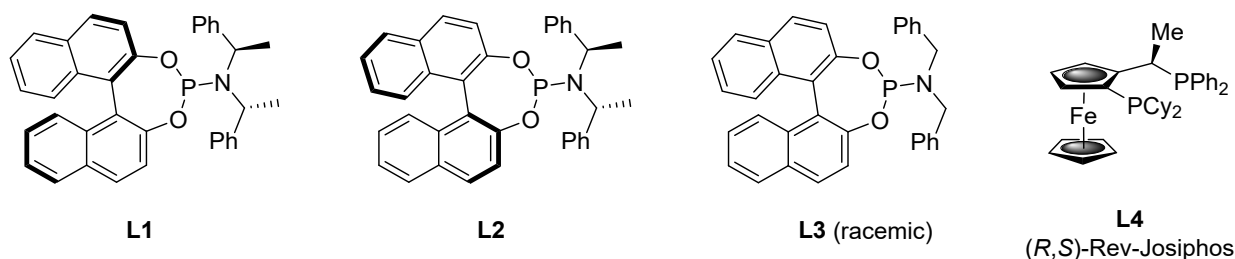

**Figure S1.** Structures of the used ligands.

## 2. General procedure for the preparation of guaiazulene-stabilized carbocations

### General procedure 1: reaction of guaiazulene with aldehydes

The guaiazulene-stabilized carbocations were prepared based on a literature procedure.<sup>2</sup> Guaiazulene (1 g, 5 mmol, 1 eq) was dissolved in MeOH (20 mL). To this solution, a mixture of the aldehyde (1.2 eq, 6.05 mmol), 50 wt% aqueous HBF<sub>4</sub> (1.7 mL, 14 mmol, 2.7 eq) or 55 wt% aqueous HPF<sub>6</sub> (2.2 mL, 14 mmol, 2.7 eq) or 70 wt% aqueous HClO<sub>4</sub> (1.2 mL, 14 mmol, 2.7 eq), and MeOH (40 mL) was slowly added at room temperature and stirred for 1–3 h. The reaction progress was followed by TLC (Hex:EtOAc 4/1). After that, Et<sub>2</sub>O was added (100 mL) and the reaction mixture containing the precipitated solid was cooled in the freezer (few hours to overnight). Then, the solid was filtered, washed with Et<sub>2</sub>O, and dried under reduced pressure. The crude product can be purified by the following recrystallization process: the crude product is dissolved in minimum amount of CH<sub>3</sub>CN and then dropwise added to Et<sub>2</sub>O. The mixture containing the precipitated solid is cooled, filtered, and dried under reduced pressure to give the final product. The prepared carbocations were stored in the fridge under Ar atmosphere. During our work, we did not observe any issues with the stability of these compounds.

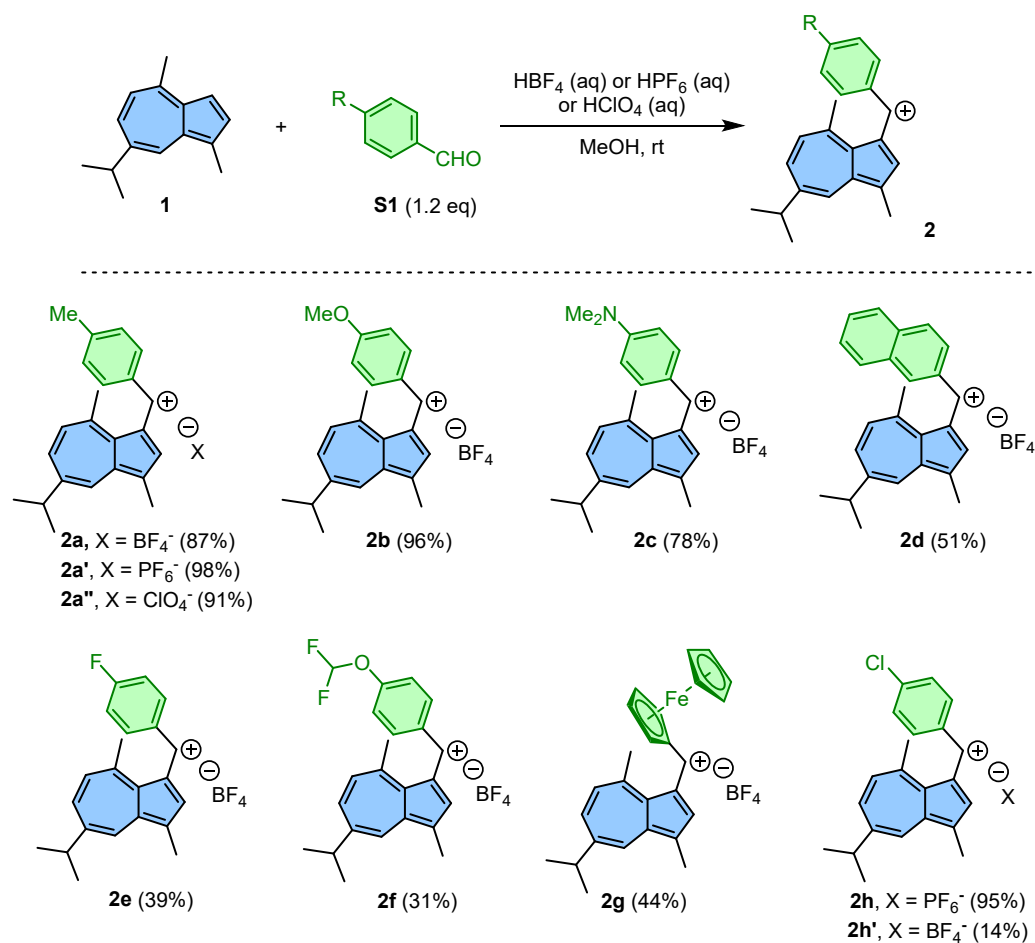

Scheme S1. Preparation of guaiazulene-stabilized carbocations.

### 3. Enolate trapping reactions – study of reaction conditions and other Michael acceptors

**Table S1.** Study of the reaction conditions.

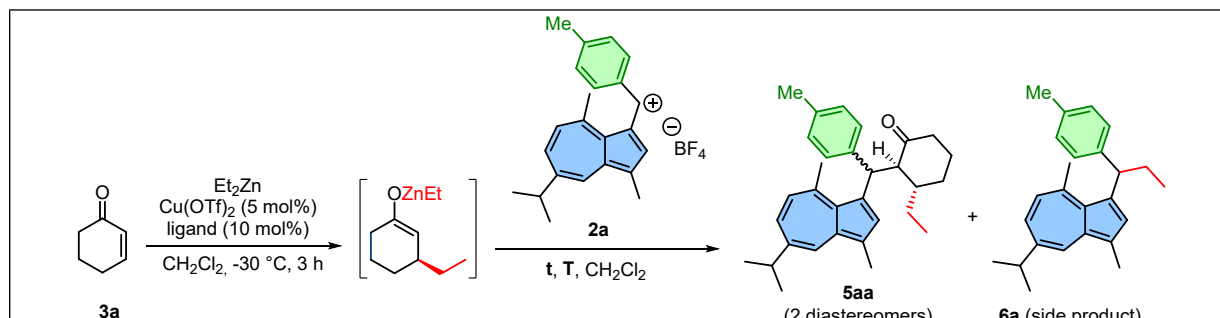

| Entry | Ligand | Et <sub>2</sub> Zn (eq) | Cation (eq) | T (enolate trap.) | t (enolate trap.) | Isolated yield (%) | ee (%) <sup>a,b</sup> | dr <sup>c</sup> | comment                 |
|-------|--------|-------------------------|-------------|-------------------|-------------------|--------------------|-----------------------|-----------------|-------------------------|
| 1.    | L1     | 3.0                     | 3.0         | -30 °C to rt      | o/n               | 53                 | -88/-86               | ~1:1            | cation added to enolate |
| 2.    | L2     | 1.3                     | 3.0         | -30 °C to rt      | o/n               | 46                 | 96/97                 | ~1:1            | enolate added to cation |
| 3.    | L2     | 1.3                     | 2.0         | rt                | 1 h               | 83                 | 97/97                 | ~1:1            | enolate added to cation |
| 4.    | L2     | 1.3                     | 2.0         | -30 °C to rt      | 1 h               | 58                 | 96/97                 | ~1:1            | enolate added to cation |
| 5.    | L3     | 1.3                     | 2.0         | -30 °C to rt      | o/n               | 33                 | -                     | ~1:1            | racemic                 |

<sup>a</sup> Enantiomeric excesses were determined by chiral HPLC using CHIRALPAK® IA column (Hex:IPA 90/10, 1.0 mL/min, 254 μm). <sup>b</sup> The stereochemistry of the product is based on the work of Alexakis *et al.*<sup>3</sup> and assuming *trans* orientation for the cyclohexanone. <sup>c</sup> Diastereomeric ratios were determined by <sup>1</sup>H NMR.

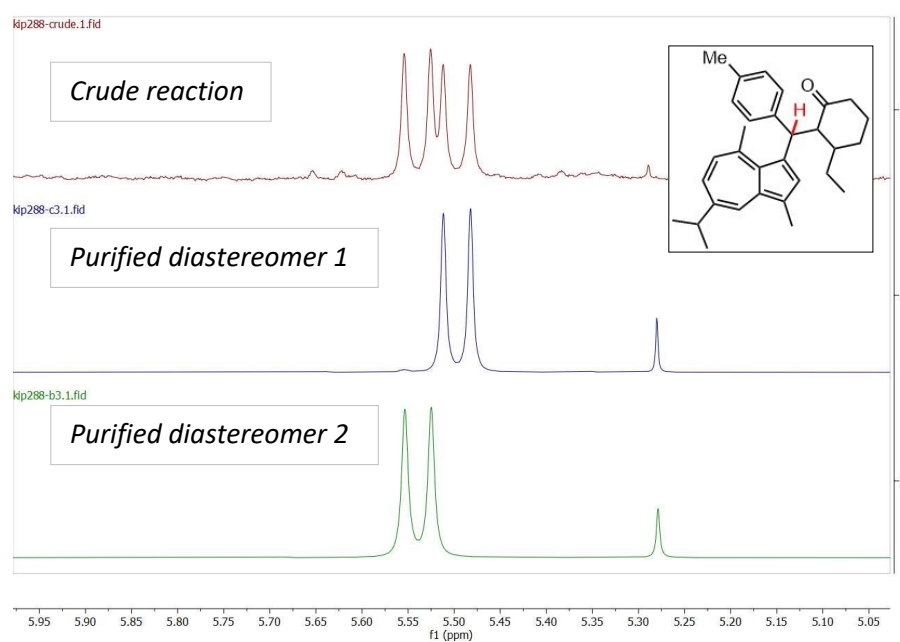

**Figure S2.** Determination of the dr ratio from the crude reaction mixture (<sup>1</sup>H NMR, CDCl<sub>3</sub>). The observed <sup>1</sup>H signals belong to the hydrogen atom shown in red color (upper right corner).



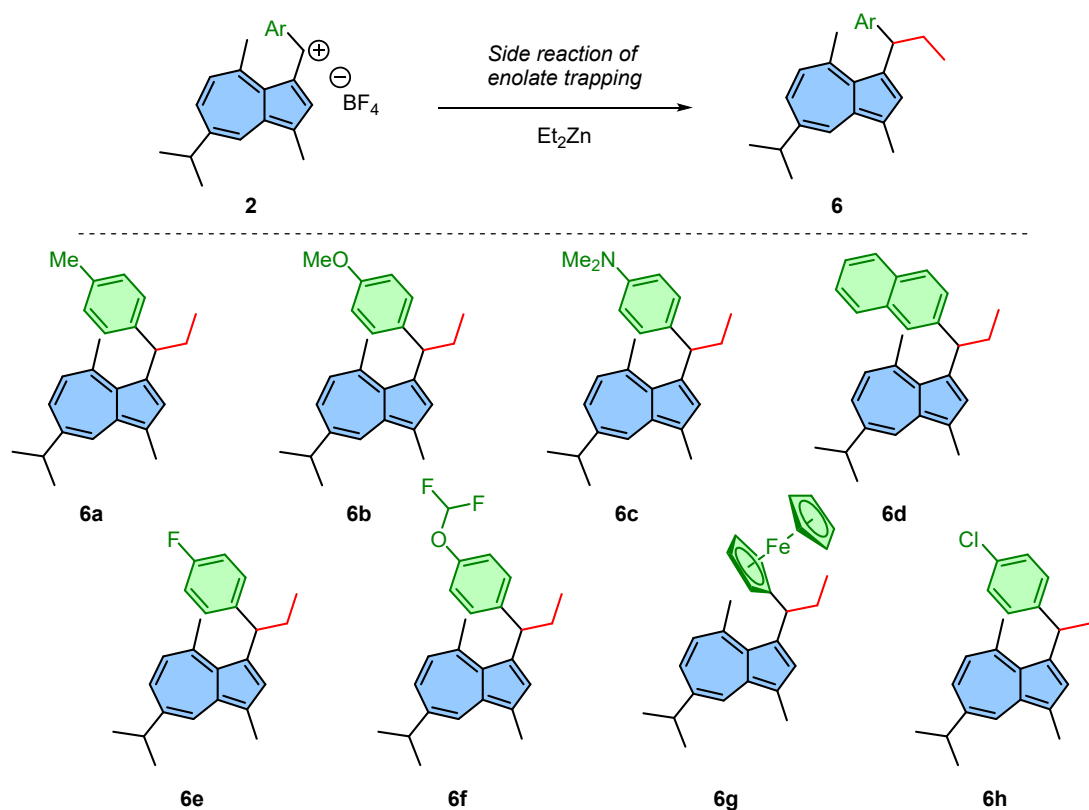

**Scheme S2.** Isolated and characterized side products from the cation scope: reaction of the cation with  $\text{Et}_2\text{Zn}$ .

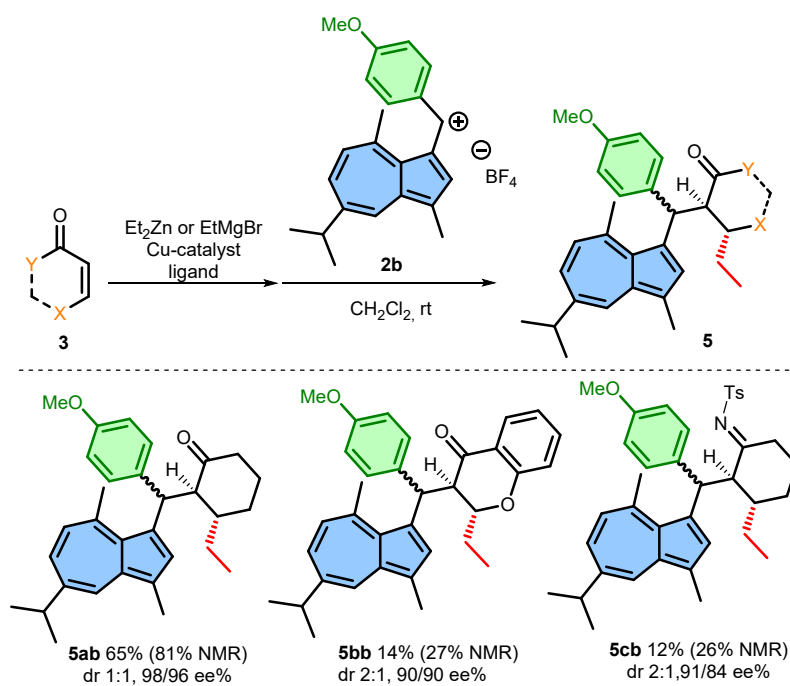

**Scheme S3.** Other asymmetric conjugate addition (ACA) formed enolates in the enolate trapping reaction.

## 4. Reaction procedures for the enolate trapping reactions

### *General procedure 2: tandem conjugate addition and enolate trapping*

Copper(I) thiophene-2-carboxylate (5 mg, 0.025 mmol, 5 mol%) and ligand **L2** (27 mg, 0.05 mmol, 10 mol%) were added to a dry Schlenk-tube under Ar atmosphere. Next, dry DCM (1.5 mL) was added, and the mixture was stirred at room temperature for 15 min and then cooled to -30 °C. At this temperature, first 2-cyclohexen-1-one (48  $\mu$ L, 0.5 mmol, 1.0 eq) and then Et<sub>2</sub>Zn (0.9M in hexane, 725  $\mu$ L, 0.65 mmol, 1.3 eq) were slowly added. The conjugate addition reaction mixture was stirred for 3 h at -30 °C. Next, in another dry Schlenk-tube the guaiazulene-stabilized carbocation (1.0 mmol, 2.0 eq) was dissolved in dry DCM (2–5 mL) at room temperature under Ar atmosphere. Finally, the first reaction mixture (containing the metal enolate) was transferred to the second Schlenk-tube (containing the solution of the carbocation) using a syringe and was stirred for 1 h at room temperature. The reaction was quenched by the addition of saturated aqueous NH<sub>4</sub>Cl (~ 10 mL). The phases were separated, and the aqueous phase was further extracted with DCM (3  $\times$  50 mL). The combined organic phase was dried over anhydr. MgSO<sub>4</sub>, and the solvent was evaporated under reduced pressure. The crude product was purified by flash chromatography (silica gel, mixtures of hexane and ethyl acetate) to gain the final products as a blue oil.

### *General procedure 3: reaction with silyl enol ether*

In a dry Schlenk-tube, carbocation **2a** (100 mg, 0.26 mmol, 1.0 eq) was measured under Ar atmosphere. Next, dry DCM (2 mL) was added and stirred at room temperature for 5 min. Then, silyl enol ether (0.52 mmol, 2.0 eq) was added slowly and the reaction mixture was stirred at the same temperature for 1 h. The reaction was quenched by the addition of sat. aqueous NaCl (~10 mL). The phases were separated, and the aqueous phase was further extracted with EtOAc (3  $\times$  50 mL). The combined organic phase was dried over anhydr. MgSO<sub>4</sub>, and the solvent was evaporated under reduced pressure. The crude product was purified by flash chromatography (silica gel, mixtures of hexane and ethyl acetate) to gain the final products as a blue oil.

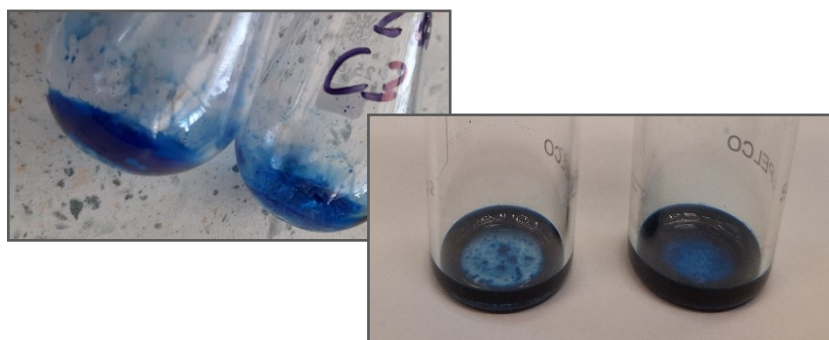

**Figure S3.** Picture of the diastereomers of **5aa** and **5ac**, respectively, after column chromatography showing the typical blue color of the products.

## 5. Scale-up reaction

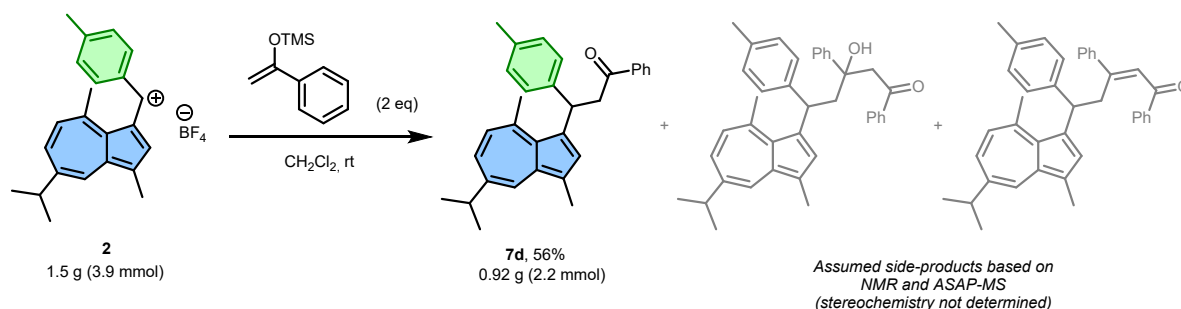

**Scheme S4.** Scale-up reaction.

In a dry round bottom flask, carbocation **2a** (1.5 g, 3.9 mmol, 1.0 eq) was measured under Ar atmosphere. Next, dry DCM (30 mL) was added and stirred at room temperature for 5 min. Then, 1-phenyl-1-trimethylsilyloxyethylene (1.6 mL, 7.8 mmol, 2.0 eq) was added slowly and the reaction mixture was stirred at the same temperature for 90 min. The reaction was quenched by the addition of sat. aqueous NaCl (~20 mL). The phases were separated, and the aqueous phase was further extracted with EtOAc (3 × 50 mL). The combined organic phase was dried over anhydr. MgSO<sub>4</sub>, and the solvent was evaporated under reduced pressure. The crude product was purified by flash chromatography (silica gel, Hex:EtOAc 50:1 to 10:1) to gain the final **7d** product as a blue solid (0.92 g, 56%).

The progress of the reaction can be observed by the color change: the original deep orange color of the carbocation **2a** changes into dark blue showing the formation of the product **7d** (see Fig. S4 for more details).

Based on NMR and ASAP-MS analyses, we assume the formation of two side-products (**Scheme S4**). These might be formed by an additional reaction of the product **7d** with another molecule of silyl enol ether reactant and consecutive H<sub>2</sub>O elimination.

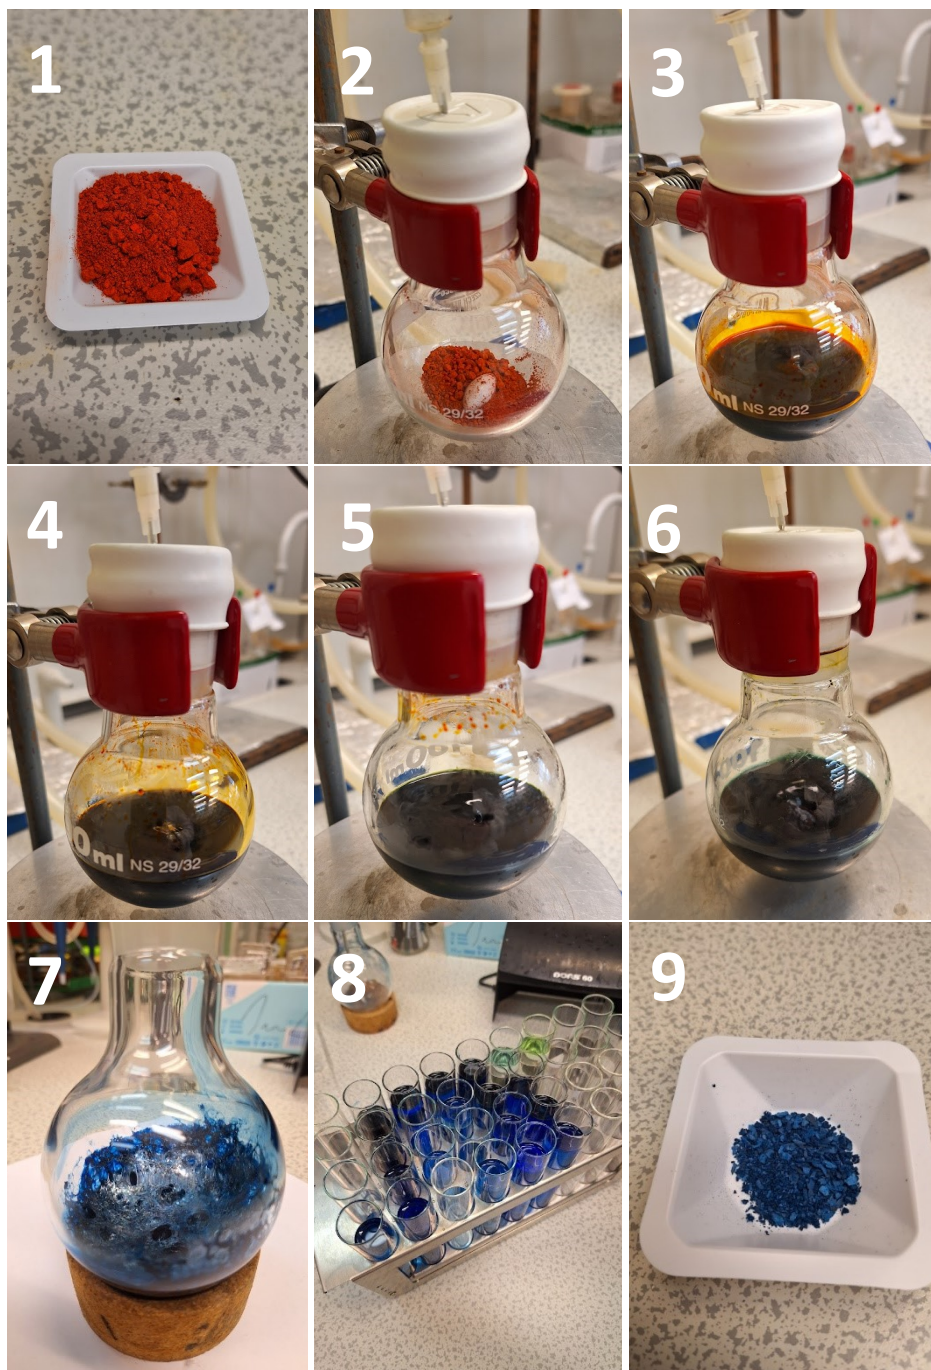

**Figure S4.** Pictures of the scale-up reaction: 1) Carbocation starting material **2a**; 2) Starting material under Ar atmosphere in a pre-dried flask; 3) After the addition of dry DCM (Note: red/orange color); 4) After the addition of 1-phenyl-1-trimethylsiloxyethylene (start of reaction); 5) Reaction mixture after 10 min (Note: color changed); 6) Reaction mixture after 90 min (Note: blue/green color); 7) Crude reaction mixture after work-up; 8) Column chromatography; 9) Final product (**7d**).

## 6. Characterization data

### 6.1. Carbocations

#### (5-isopropyl-3,8-dimethylazulen-1-yl)(p-tolyl)methylium tetrafluoroborate (2a)

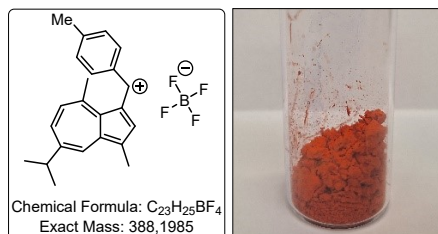

Following the *General procedure 1 (double scale)*: guaiazulene (2.0 g, 10.1 mmol), 48 wt% aqueous HBF<sub>4</sub> (3.4 mL, 2.7 eq), 4-methylbenzaldehyde (1.4 mL, 1.2 eq), MeOH (40 + 80 mL). Isolated: 3.4 g (87%)

Orange solid, **Mp**: 180–187 °C (degr.); **UV-Vis**:  $\lambda_{\max}$  (DCM): 488 nm ( $\epsilon$ : 32400 M<sup>-1</sup> cm<sup>-1</sup>); **<sup>1</sup>H NMR** (400 MHz, CD<sub>2</sub>Cl<sub>2</sub>):  $\delta$  8.79 (s, 1H), 8.59 (d,  $J$  = 11.2 Hz, 1H), 8.54 (d,  $J$  = 2.2 Hz, 1H), 8.42 (dd,  $J$  = 11.3, 2.3 Hz, 1H), 8.06 – 8.02 (m, 1H), 7.76 (d,  $J$  = 8.2 Hz, 2H), 7.49 (d,  $J$  = 8.0 Hz, 2H), 3.51 (p,  $J$  = 6.8 Hz, 1H), 3.46 (s, 3H), 2.60 (s, 3H), 2.54 (s, 3H), 1.55 (s, 3H), 1.53 (s, 3H). **<sup>13</sup>C NMR** (150 MHz, CD<sub>2</sub>Cl<sub>2</sub>):  $\delta$  170.14, 160.04, 156.34, 152.71, 150.64, 149.37, 144.67, 144.22, 143.89, 141.32, 138.44, 138.00, 133.21, 132.51, 130.51, 39.75, 29.49, 23.58, 21.62, 13.62. **<sup>19</sup>F NMR** (376 MHz, CD<sub>2</sub>Cl<sub>2</sub>):  $\delta$  -152.90, -152.95. **IR** (ATR):  $\nu_{\max}$  2967 (w), 1579 (m), 1556 (m), 1403 (m), 1348 (m), 1323 (m), 1192 (m), 1048 (s), 1035 (s), 819 (m), 520 (m), 507 (m) cm<sup>-1</sup>. **HRMS** (HESI):  $m/z$  [M+H]<sup>+</sup> calcd for C<sub>23</sub>H<sub>25</sub>: 301.1951, found: 301.1946

Spectral data corresponds to the literature (different NMR solvent).<sup>4</sup>

#### (5-isopropyl-3,8-dimethylazulen-1-yl)(p-tolyl)methylium hexafluorophosphate(V) (2a')

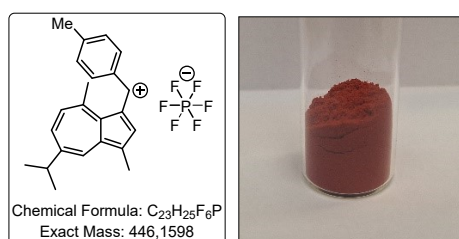

Following the *General procedure 1*: guaiazulene (1.0 g, 5.0 mmol), 55 wt% aqueous HPF<sub>6</sub> (2.2 mL, 2.7 eq), 4-methylbenzaldehyde (0.7 mL, 1.2 eq), MeOH (20 + 40 mL). Isolated: 2.2 g (98%)

Dark red solid, **Mp**: 140–145 °C (degr.); **UV-Vis**:  $\lambda_{\max}$  (DCM): 491 nm ( $\epsilon$ : 29300 M<sup>-1</sup> cm<sup>-1</sup>); **<sup>1</sup>H NMR** (400 MHz, CD<sub>2</sub>Cl<sub>2</sub>):  $\delta$  8.73 (s, 1H), 8.55 – 8.46 (m, 2H), 8.35 (dd,  $J$  = 11.3, 2.2 Hz, 1H), 8.01 (s, 1H), 7.71 (d,  $J$  = 8.0 Hz, 2H), 7.45 (d,  $J$  = 8.0 Hz, 2H), 3.47 (p,  $J$  = 6.9 Hz, 1H), 3.41 (s, 3H), 2.56 (s, 3H), 2.50 (s, 3H), 1.51 (s, 3H), 1.50 (s, 3H). **<sup>13</sup>C NMR** (150 MHz, CD<sub>2</sub>Cl<sub>2</sub>):  $\delta$  170.60, 160.55, 156.62, 153.18, 151.04, 149.63, 145.18, 144.69, 144.20, 141.83, 138.88, 138.45, 133.63 (2 × C<sub>Ar</sub>), 132.91, 130.97 (2 × C<sub>Ar</sub>), 40.19, 29.87, 23.99 (2 × CH<sub>3</sub>), 22.03, 14.00. **<sup>19</sup>F NMR** (376 MHz, CD<sub>2</sub>Cl<sub>2</sub>):  $\delta$  -73.31 (d,  $J$  = 710.8 Hz). **IR** (ATR):  $\nu_{\max}$  2970 (w), 1572 (w), 1550 (w), 1401 (w), 1347 (w), 1184 (w), 1047 (w), 832 (s), 813 (s), 556 (s), 506 (m) cm<sup>-1</sup>. **HRMS** (HESI):  $m/z$  [M+H]<sup>+</sup> calcd for C<sub>23</sub>H<sub>25</sub>: 301.1951, found: 301.1956

Spectral data corresponds to the literature (different NMR solvent).<sup>4</sup>



### (5-isopropyl-3,8-dimethylazulen-1-yl)(p-tolyl)methylium perchlorate (2a'')

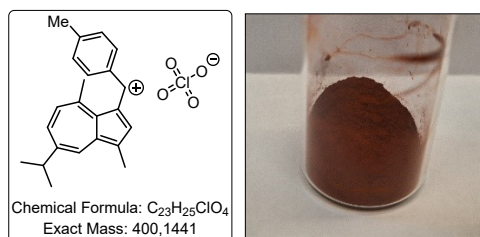

Following the *General procedure 1 (half scale)*: guaiazulene (0.5 g, 2.5 mmol), 70 wt% aqueous HClO<sub>4</sub> (0.6 mL, 2.7 eq), 4-methylbenzaldehyde (0.35 mL, 1.2 eq), MeOH (10 + 20 mL). Isolated: 0.9 g (91%)

Dark red solid, **Mp**: 175–180 °C (degr.); **UV-Vis**:  $\lambda_{\text{max}}$  (DCM): 487 nm ( $\epsilon$ : 29500 M<sup>-1</sup> cm<sup>-1</sup>); **<sup>1</sup>H NMR** (400 MHz, CD<sub>2</sub>Cl<sub>2</sub>):  $\delta$  8.75 (s, 1H), 8.56 (d,  $J$  = 11.2 Hz, 1H), 8.51 (d,  $J$  = 2.2 Hz, 1H), 8.39 (dd,  $J$  = 11.2, 2.2 Hz, 1H), 8.00 (s, 1H), 7.72 (d,  $J$  = 7.9 Hz, 2H), 7.45 (d,  $J$  = 7.9 Hz, 2H), 3.52 – 3.45 (m, 1H), 3.43 (s, 3H), 2.56 (s, 3H), 2.50 (s, 3H), 1.51 (s, 3H), 1.50 (s, 3H). **<sup>13</sup>C NMR** (100 MHz, CD<sub>2</sub>Cl<sub>2</sub>):  $\delta$  170.55, 160.48, 156.77, 153.18, 151.02, 149.82, 145.04, 144.67, 144.31, 141.72, 138.90, 138.46, 133.64 (2 × C<sub>Ar</sub>), 132.98, 130.92 (2 × C<sub>Ar</sub>), 40.16, 29.95, 24.01 (2 × CH<sub>3</sub>), 22.02, 14.04, 1.16. **IR** (ATR):  $\nu_{\text{max}}$  2964 (w), 1574 (m), 1551 (m), 1398 (m), 1344 (m), 1321 (m), 1190 (m), 1077 (s), 1045 (s), 847 (m), 815 (m), 620 (s), 504 (m) cm<sup>-1</sup>. **HRMS** (HESI):  $m/z$  [M+H]<sup>+</sup> calcd for C<sub>23</sub>H<sub>25</sub>: 301.1951, found: 301.1957

### 5-isopropyl-3,8-dimethylazulen-1-yl(4-methoxyphenyl)methylium tetrafluoroborate (2b)

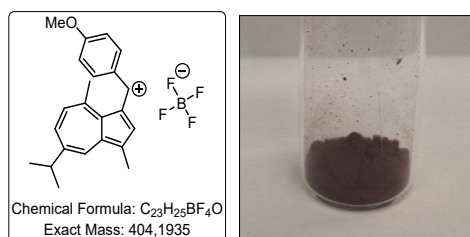

Following the *General procedure 1 (double scale)*: guaiazulene (2.0 g, 10.1 mmol), 48 wt% aqueous HBF<sub>4</sub> (3.4 mL, 2.7 eq), 4-methoxybenzaldehyde (1.5 mL, 1.2 eq), MeOH (40 + 80 mL). Isolated: 3.9 g (96%)

Brown solid, **Mp**: 180–185 °C (degr.); **UV-Vis**:  $\lambda_{\text{max}}$  (DCM): 530 nm ( $\epsilon$ : 45600 M<sup>-1</sup> cm<sup>-1</sup>); **<sup>1</sup>H NMR** (400 MHz, CD<sub>2</sub>Cl<sub>2</sub>):  $\delta$  8.79 (s, 1H), 8.55 – 8.47 (m, 2H, overlaying signals), 8.36 (dd,  $J$  = 11.2, 2.2 Hz, 1H), 8.09 (s, 1H), 7.94 – 7.87 (m, 2H), 7.23 – 7.17 (m, 2H), 4.00 (s, 3H), 3.56 – 3.46 (m, 1H), 3.45 (s, 3H), 2.61 (s, 3H), 1.54 (s, 3H), 1.52 (s, 3H). **<sup>13</sup>C NMR** (100 MHz, CD<sub>2</sub>Cl<sub>2</sub>):  $\delta$  168.42, 164.61, 158.79, 155.81, 152.42, 150.85, 148.24, 143.37, 143.31, 141.31, 137.87, 136.64, 136.28 (2 × C<sub>Ar</sub>), 128.01 (2 × C<sub>Ar</sub>), 115.72, 56.01, 53.99, 53.72, 53.45, 53.18, 52.91, 39.59, 29.58, 23.63 (2 × CH<sub>3</sub>), 13.56. **<sup>19</sup>F NMR** (376 MHz, CD<sub>2</sub>Cl<sub>2</sub>):  $\delta$  -152.84, -152.89. **IR** (ATR):  $\nu_{\text{max}}$  2969 (w), 1575 (m), 1550 (m), 1513 (m), 1431 (m), 1399 (m), 1349 (m), 1271 (m), 1177 (m), 1044 (s), 1021 (s), 834 (m), 520 (m) cm<sup>-1</sup>. **HRMS** (HESI):  $m/z$  [M+H]<sup>+</sup> calcd for C<sub>23</sub>H<sub>25</sub>O: 317.1900, found: 317.1896

The carbocation with PF<sub>6</sub><sup>-</sup> anion has been described before.<sup>5</sup>

### (4-(dimethylamino)phenyl)(5-isopropyl-3,8-dimethylazulen-1-yl)methylium tetrafluoroborate (2c)

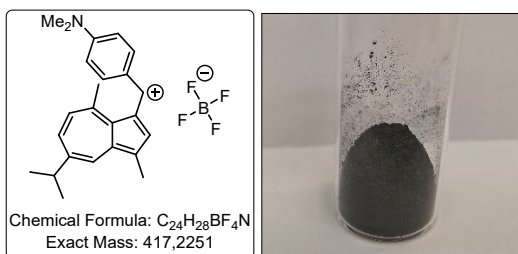

Following the *General procedure 1*: guaiazulene (1.0 g, 5.0 mmol), 50 wt% aqueous  $HBf_4$  (1.7 mL, 2.7 eq), 4-(dimethylamino)benzaldehyde (0.9 g, 1.2 eq), MeOH (20 + 40 mL). Isolated: 1.6 g (78%)

Dark green solid, **Mp**: 163–165 °C (degr.) [lit.<sup>4</sup> mp>160 °C decomp.]; **UV-Vis**:  $\lambda_{max}$  (DCM): 652 nm ( $\epsilon$ : 115200  $M^{-1} cm^{-1}$ ); **<sup>1</sup>H NMR** (400 MHz,  $CD_2Cl_2$ ):  $\delta$  8.72 (s, 1H), 8.44 (s, 1H), 8.17 (s, 1H), 8.08 (s, 2H), 7.97 – 7.90 (m, 2H), 7.02 – 6.96 (m, 2H), 3.42 – 3.35 (m, 4H, overlaying signals), 3.34 (s, 6H), 2.64 (s, 3H), 1.50 (s, 3H), 1.48 (s, 3H). **<sup>13</sup>C NMR** (100 MHz,  $CD_2Cl_2$ ):  $\delta$  160.38, 155.63, 153.06, 152.83, 152.01, 148.99, 142.64, 141.44, 140.98, 138.90 (2  $\times$   $C_{Ar}$ ), 138.37, 136.99, 131.08, 124.05, 113.95 (2  $\times$   $C_{Ar}$ ), 40.56 (2  $\times$   $CH_3$ ), 38.93, 29.66, 23.80 (2  $\times$   $CH_3$ ), 13.28. **<sup>19</sup>F NMR** (376 MHz,  $CD_2Cl_2$ ):  $\delta$  -153.10, -153.15. **IR** (ATR):  $\nu_{max}$  2960 (w), 1610 (m), 1504 (m), 1329 (m), 1164 (m), 1029 (s), 825 (m), 718 (m), 519 (m)  $cm^{-1}$ . **HRMS** (HESI): m/z [M+H]<sup>+</sup> calcd for  $C_{23}H_{26}N$ : 316.2060, found: 316.2060

The spectroscopic data corresponds to the literature (different NMR solvent).<sup>4</sup>

#### (5-isopropyl-3,8-dimethylazulen-1-yl)(naphthalen-2-yl)methylmethylium tetrafluoroborate (2d)

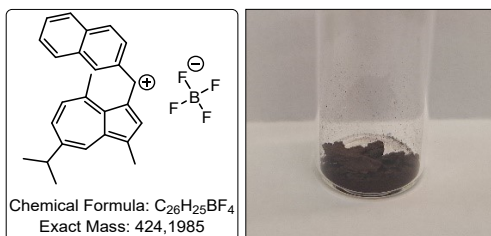

Following the *General procedure 1*: guaiazulene (1.0 g, 5.0 mmol), 50 wt% aqueous  $HBf_4$  (1.7 mL, 2.7 eq), 2-naphthaldehyde (0.8 g, 1.2 eq), MeOH (20 + 40 mL). Isolated: 1.1 g (51%)

Dark brown solid, **Mp**: 164–169 °C (degr.); **UV-Vis**:  $\lambda_{max}$  (DCM): 518 nm ( $\epsilon$ : 29500  $M^{-1} cm^{-1}$ ); **<sup>1</sup>H NMR** (400 MHz,  $CD_2Cl_2$ ):  $\delta$  8.95 (s, 1H), 8.62 (d,  $J$  = 11.2 Hz, 1H), 8.55 (d,  $J$  = 2.2 Hz, 1H), 8.44 (dd,  $J$  = 11.2, 2.2 Hz, 1H), 8.37 (d,  $J$  = 1.8 Hz, 1H), 8.15 – 8.05 (m, 3H), 7.99 (d,  $J$  = 8.1 Hz, 1H), 7.92 (dd,  $J$  = 8.6, 1.9 Hz, 1H), 7.75 – 7.63 (m, 2H), 3.57 – 3.46 (m, 4H, overlaying signals), 2.61 (s, 3H), 1.56 (s, 4H), 1.54 (s, 3H). **<sup>13</sup>C NMR** (100 MHz,  $CD_2Cl_2$ ):  $\delta$  170.57, 160.16, 156.66, 152.76, 150.21, 149.67, 144.80, 144.03, 141.24, 139.25, 138.07, 135.67, 134.83, 133.20, 132.84, 129.53, 129.50, 129.46, 127.90, 127.61, 127.55, 39.79, 29.51, 23.59 (2  $\times$   $CH_3$ ), 13.66. **<sup>19</sup>F NMR** (376 MHz,  $CD_2Cl_2$ ):  $\delta$  -152.60, -152.65. **IR** (ATR):  $\nu_{max}$  2971 (w), 1573 (m), 1399 (m), 1344 (m), 1093 (m), 1048 (s), 1034 (s), 928 (m), 831 (m), 762 (m), 658 (m), 517 (m), 450 (m)  $cm^{-1}$ . **HRMS** (HESI): m/z [M+H]<sup>+</sup> calcd for  $C_{26}H_{25}$ : 337.1951, found: 337.1944

#### (4-fluorophenyl)(5-isopropyl-3,8-dimethylazulen-1-yl)methylmethylium tetrafluoroborate (2e)

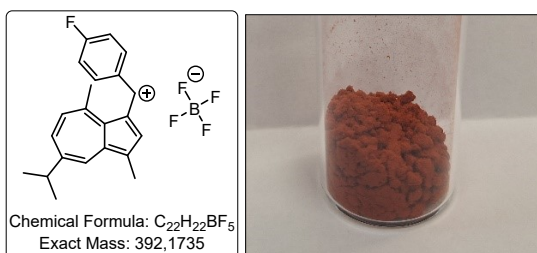

Following the *General procedure 1*: guaiazulene (1.0 g, 5.0 mmol), 50 wt% aqueous HBF<sub>4</sub> (1.7 mL, 2.7 eq), 4-fluorobenzaldehyde (0.65 mL, 1.2 eq), MeOH (20 + 40 mL). Isolated: 0.8 g (39%)

Red solid, **Mp**: 165–175 °C (degr.); **UV-Vis**:  $\lambda_{\max}$  (DCM): 473 nm ( $\epsilon$ : 22200 M<sup>-1</sup> cm<sup>-1</sup>); **<sup>1</sup>H NMR** (400 MHz, CD<sub>2</sub>Cl<sub>2</sub>):  $\delta$  8.78 (s, 1H), 8.63 (d,  $J$  = 11.2 Hz, 1H), 8.55 (d,  $J$  = 2.3 Hz, 1H), 8.45 (dd,  $J$  = 11.3, 2.2 Hz, 1H), 7.95 (s, 1H), 7.90–7.82 (m, 2H), 7.36 (t,  $J$  = 8.6 Hz, 2H), 3.52 (p,  $J$  = 6.8 Hz, 1H), 3.46 (s, 3H), 2.59 (s, 3H), 1.55 (s, 3H), 1.53 (s, 3H). **<sup>13</sup>C NMR** (100 MHz, CD<sub>2</sub>Cl<sub>2</sub>):  $\delta$  171.02, 165.26 (d,  $J$  = 256.8 Hz), 160.58, 156.90, 152.85, 149.98, 148.72, 144.98, 144.20, 140.69, 139.18, 138.15, 135.24 (d,  $J$  = 9.1 Hz) (2 × C<sub>Ar</sub>), 131.60 (d,  $J$  = 3.3 Hz), 116.99 (d,  $J$  = 22.2 Hz) (2 × C<sub>Ar</sub>), 39.83, 29.42, 23.56 (2 × CH<sub>3</sub>), 13.64. **<sup>19</sup>F NMR** (376 MHz, CD<sub>2</sub>Cl<sub>2</sub>):  $\delta$  -105.34 (ddd,  $J$  = 13.8, 8.4, 5.4 Hz), -152.61, -152.66. **IR** (ATR):  $\nu_{\max}$  2971 (w), 1570 (m), 1507 (m), 1454 (m), 1405 (m), 1350 (m), 1195 (m), 1164 (m), 1048 (s), 1035 (s), 910 (m), 840 (m), 663 (m), 514 (m) cm<sup>-1</sup>. **HRMS** (HESI):  $m/z$  [M+H]<sup>+</sup> calcd for C<sub>22</sub>H<sub>22</sub>F: 305.1700, found: 305.1694

#### (4-(difluoromethoxy)phenyl)(5-isopropyl-3,8-dimethylazulen-1-yl)methylium tetrafluoroborate (2f)

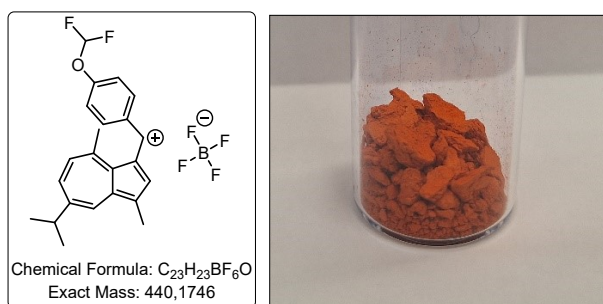

Following the *General procedure 1*: guaiazulene (1.0 g, 5.0 mmol), 50 wt% aqueous HBF<sub>4</sub> (1.7 mL, 2.7 eq), 4-(difluoromethoxy)benzaldehyde (0.8 mL, 1.2 eq), MeOH (20 + 40 mL). Isolated: 0.7 g (31%)

Red-orange solid, **Mp**: 164–175 °C (degr.); **UV-Vis**:  $\lambda_{\max}$  (DCM): 479 nm ( $\epsilon$ : 24000 M<sup>-1</sup> cm<sup>-1</sup>); **<sup>1</sup>H NMR** (400 MHz, CD<sub>2</sub>Cl<sub>2</sub>):  $\delta$  8.77 (s, 1H), 8.62 (d,  $J$  = 11.3 Hz, 1H), 8.54 (d,  $J$  = 2.3 Hz, 1H), 8.44 (dd,  $J$  = 11.2, 2.2 Hz, 1H), 7.96 (s, 1H), 7.92–7.82 (m, 2H), 7.43–7.35 (m, 2H), 6.78 (t,  $J$  = 73.0 Hz, 1H), 3.52 (p,  $J$  = 6.9 Hz, 1H), 3.47 (s, 3H), 2.59 (s, 3H), 1.55 (s, 3H), 1.54 (s, 3H). **<sup>13</sup>C NMR** (100 MHz, CD<sub>2</sub>Cl<sub>2</sub>):  $\delta$  171.01, 160.57, 156.87, 154.31, 152.81, 149.95, 148.64, 144.98, 144.18, 140.72, 139.27, 138.13, 134.81 (2 × C<sub>Ar</sub>), 132.05, 119.72 (2 × C<sub>Ar</sub>), 115.51 (t,  $J$  = 261.3 Hz), 39.84, 29.44, 23.57 (2 × CH<sub>3</sub>), 13.66. **<sup>19</sup>F NMR** (376 MHz, CD<sub>2</sub>Cl<sub>2</sub>):  $\delta$  -82.64 (d,  $J$  = 72.9 Hz), -152.68. **IR** (ATR):  $\nu_{\max}$  2974 (w), 1605 (m), 1585 (m), 1566 (m), 1509 (m), 1406 (m), 1350 (m), 1188 (m), 1051 (s), 838 (m), 662 (m), 521 (m) cm<sup>-1</sup>. **HRMS** (HESI):  $m/z$  [M+H]<sup>+</sup> calcd for C<sub>23</sub>H<sub>23</sub>F<sub>2</sub>O: 353.1712, found: 353.1718

#### (5-isopropyl-3,8-dimethylazulen-1-yl)(ferrocenyl)methylium tetrafluoroborate (2g)

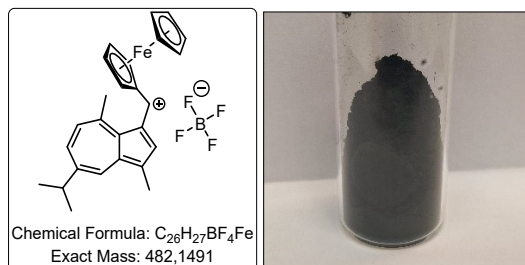

Following the *General procedure 1*: guaiazulene (1.0 g, 5.0 mmol), 50 wt% aqueous HBF<sub>4</sub> (1.7 mL, 2.7 eq), ferrocenecarboxaldehyde (1.3 mL, 1.2 eq), MeOH (20 + 40 mL). Isolated: 1.1 g (44%)

Dark green solid, **Mp**: 188–200 °C (degr.); **UV-Vis**:  $\lambda_{\max}$  (DCM): 473 nm ( $\epsilon$ : 15300 M<sup>-1</sup> cm<sup>-1</sup>) and 2<sup>nd</sup> long-wavelength maximum due to the ferrocene arm: 723 nm ( $\epsilon$ : 8600 M<sup>-1</sup> cm<sup>-1</sup>); **<sup>1</sup>H NMR** (400 MHz, CD<sub>2</sub>Cl<sub>2</sub>):  $\delta$  8.74 (s, 1H), 8.41 (d,  $J$  = 2.3 Hz, 1H), 8.35 (d,  $J$  = 11.2 Hz, 1H), 8.13 (dd,  $J$  = 11.1, 2.2 Hz, 1H), 7.98 (s, 1H), 5.38 (t,  $J$  = 1.9 Hz, 2H), 5.16



(t,  $J = 2.0$  Hz, 2H), 4.43 (s, 5H), 3.39 (s, 3H), 3.34 (p,  $J = 6.9$  Hz, 1H), 2.51 (s, 3H), 1.47 (s, 3H), 1.46 (s, 3H). **<sup>13</sup>C NMR** (100 MHz, CD<sub>2</sub>Cl<sub>2</sub>):  $\delta$  163.08, 155.30, 154.64, 153.95, 148.27, 144.52, 142.80, 140.43, 140.10, 138.22, 133.11, 82.23, 79.64 (2  $\times$  C<sub>CP</sub>), 74.48 (2  $\times$  C<sub>CP</sub>), 73.18 (5  $\times$  C<sub>CP</sub>), 39.47, 29.28, 23.41 (2  $\times$  CH<sub>3</sub>), 13.46. **<sup>19</sup>F NMR** (376 MHz, CD<sub>2</sub>Cl<sub>2</sub>):  $\delta$  -152.84, -152.89. **IR** (ATR):  $\nu_{\max}$  3093 (w), 2972 (w), 2878 (w), 1545 (m), 1517 (m), 1394 (m), 1369 (m), 1338 (m), 1305 (m), 1268 (m), 1095 (m), 1032 (s), 894 (m), 835 (s), 662 (m), 630 (m), 499 (m), 471 (m) cm<sup>-1</sup>. **HRMS** (HESI):  $m/z$  [M+H]<sup>+</sup> calcd for C<sub>26</sub>H<sub>27</sub>Fe: 395.1457, found: 395.1464

The spectroscopic data corresponds to the literature (different solvent in NMR).<sup>6</sup>

#### (4-chlorophenyl)(5-isopropyl-3,8-dimethylazulen-1-yl)methylum hexafluorophosphate (2h)

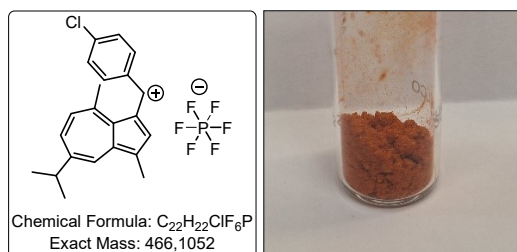

Following the *General procedure 1 (lower-scale)*: guaiiazulene (0.25 g, 1.25 mmol), 55 wt% aqueous HPF<sub>6</sub> (550  $\mu$ L, 2.7 eq), 4-chlorobenzaldehyde (0.21 g, 1.2 eq), MeOH (5 + 10 mL). Isolated: 0.6 g (95%)

Red solid, **Mp**: 140–145 °C (degr.); **UV-Vis**:  $\lambda_{\max}$  (DCM): 474 nm ( $\epsilon$ : 21100 M<sup>-1</sup> cm<sup>-1</sup>); **<sup>1</sup>H NMR** (400 MHz, CD<sub>2</sub>Cl<sub>2</sub>):  $\delta$  8.70 (s, 1H), 8.59 (d,  $J = 11.3$  Hz, 1H), 8.54 (d,  $J = 2.2$  Hz, 1H), 8.43 (dd,  $J = 11.2$ , 2.3 Hz, 1H), 7.92 (s, 1H), 7.79 – 7.73 (m, 2H), 7.68 – 7.62 (m, 2H), 3.52 (p,  $J = 6.9$  Hz, 1H), 3.45 (s, 3H), 2.58 (d,  $J = 1.2$  Hz, 3H), 1.55 (s, 3H), 1.54 (s, 3H). **<sup>13</sup>C NMR** (100 MHz, CD<sub>2</sub>Cl<sub>2</sub>):  $\delta$  171.53, 160.93, 156.81, 152.81, 150.08, 148.21, 145.30, 144.25, 140.61, 139.79, 139.00, 138.22, 133.80 (2  $\times$  C<sub>Ar</sub>), 129.92 (2  $\times$  C<sub>Ar</sub>), 39.92, 29.38, 23.54 (2  $\times$  CH<sub>3</sub>), 13.67. **<sup>19</sup>F NMR** (376 MHz, CD<sub>2</sub>Cl<sub>2</sub>):  $\delta$  -73.22 (d,  $J = 710.8$  Hz). **IR** (ATR):  $\nu_{\max}$  2977 (w), 1577 (m), 1404 (m), 1345 (m), 1196 (m), 1088 (m), 828 (s), 744 (m), 663 (m), 556 (s), 508 (m) cm<sup>-1</sup>. **HRMS** (HESI):  $m/z$  [M+H]<sup>+</sup> calcd for C<sub>22</sub>H<sub>22</sub>Cl: 321.1405, found: 321.1411

#### (4-chlorophenyl)(5-isopropyl-3,8-dimethylazulen-1-yl)methylum tetrafluoroborate (2h')

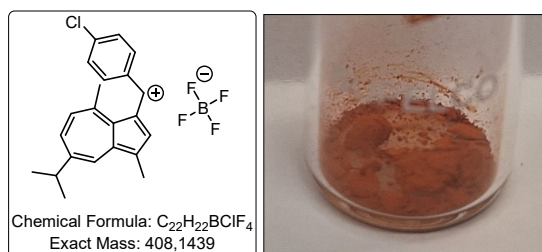

Following the *General procedure 1 (lower-scale)*: guaiiazulene (0.25 g, 1.25 mmol), 50 wt% aqueous HBF<sub>4</sub> (424  $\mu$ L, 2.7 eq), 4-chlorobenzaldehyde (0.21 g, 1.2 eq), MeOH (5 + 10 mL). Isolated: 70 mg (14%)

Red solid, **Mp**: 158–168 °C (degr.); **UV-Vis**:  $\lambda_{\max}$  (DCM): 474 nm ( $\epsilon$ : 25200 M<sup>-1</sup> cm<sup>-1</sup>); **<sup>1</sup>H NMR** (400 MHz, CD<sub>2</sub>Cl<sub>2</sub>):  $\delta$  8.74 (s, 1H), 8.64 (d,  $J = 11.2$  Hz, 1H), 8.54 (d,  $J = 2.2$  Hz, 1H), 8.46 (dd,  $J = 11.2$ , 2.3 Hz, 1H), 7.92 (s, 1H), 7.82 – 7.73 (m, 2H), 7.67 – 7.59 (m, 2H), 3.53 (p,  $J = 6.8$  Hz, 1H), 3.46 (s, 3H), 2.58 (s, 3H), 1.55 (s, 3H), 1.53 (s, 3H). **<sup>13</sup>C NMR** (100 MHz, CD<sub>2</sub>Cl<sub>2</sub>):  $\delta$  171.45, 160.82, 157.07, 152.81, 150.26, 148.27, 145.26, 144.34, 140.51, 139.78, 138.86, 138.18, 133.86 (2  $\times$  C<sub>Ar</sub>), 133.73, 129.86 (2  $\times$  C<sub>Ar</sub>), 39.87, 29.40, 23.55 (2  $\times$  CH<sub>3</sub>), 13.67. **<sup>19</sup>F NMR** (376 MHz, CD<sub>2</sub>Cl<sub>2</sub>):  $\delta$  -152.56, -152.61. **IR** (ATR):  $\nu_{\max}$  2976 (w), 1607 (m), 1578 (m), 1454 (m), 1405 (m), 1350 (m), 1048 (s), 847 (m), 827 (m), 662 (m), 508 (m) cm<sup>-1</sup>. **HRMS** (HESI):  $m/z$  [M+H]<sup>+</sup> calcd for C<sub>22</sub>H<sub>22</sub>Cl: 321.1405, found: 321.1413

## 6.2. Products of tandem conjugate addition and enolate trapping

### 3-ethyl-2-((5-isopropyl-3,8-dimethylazulen-1-yl)(p-tolyl)methyl)cyclohexan-1-one (5aa)

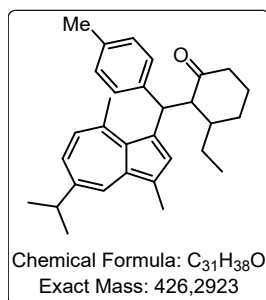

Following the *General procedure 2* using carbocation **2a** (388 mg, 1.0 mmol, 2.0 eq). Based on <sup>1</sup>H NMR analysis of the crude reaction mixture, the diastereomeric ratio was 1:1. The crude product was purified by flash chromatography (silica gel, Hex:EtOAc 40:1 to 10:1). Isolated: 136 mg (64%)

#### Diastereomer 1:

Blue oil, *R<sub>f</sub>* (silica, Hex:EtOAc 10/1): 0.37; <sup>1</sup>H NMR (400 MHz, CDCl<sub>3</sub>): δ 8.05 (d, *J* = 2.2 Hz, 1H), 7.79 (s, 1H), 7.24 – 7.20 (m, 1H), 7.17 – 7.10 (m, 2H), 6.99 (d, *J* = 7.9 Hz, 2H), 6.81 (d, *J* = 10.7 Hz, 1H), 5.50 (d, *J* = 11.8 Hz, 1H), 3.23 (d, *J* = 11.7 Hz, 1H), 3.15 (s, 3H), 2.99 (p, *J* = 6.9 Hz, 1H), 2.73 (td, *J* = 13.6, 6.8 Hz, 1H), 2.66 (s, 3H), 2.27 – 2.21 (m, 1H), 2.22 (d, *J* = 7.7 Hz, 0H), 2.20 (s, 3H), 2.08 – 1.91 (m, 2H), 1.89 – 1.78 (m, 2H), 1.49 – 1.41 (m, 1H), 1.40 – 1.23 (m, 8H), 0.82 (t, *J* = 7.4 Hz, 3H). <sup>13</sup>C NMR (100 MHz, CDCl<sub>3</sub>): δ 214.37, 143.63, 141.17, 139.49, 139.44, 137.85, 135.51, 134.20, 133.44, 132.38, 129.26 (2 × C<sub>Ar</sub>), 128.50 (2 × C<sub>Ar</sub>), 126.88, 126.71, 124.91, 63.35, 45.03, 40.99, 39.66, 37.56, 28.44, 24.84, 24.57, 24.54, 23.84, 23.74, 20.95, 13.24, 11.72. IR (ATR): *v*<sub>max</sub> 2961 (m), 2929 (m), 2873 (m), 1704 (s), 1511 (m), 1460 (m), 1450 (m), 1377 (m), 1306 (m), 1109 (m), 1085 (m), 1020 (m), 817 (m), 730 (m), 503 (m) cm<sup>-1</sup>. HRMS (HESI): *m/z* [M+H]<sup>+</sup> calcd for C<sub>31</sub>H<sub>39</sub>O: 427.2995, found: 427.2989; [M+Na]<sup>+</sup> calcd for C<sub>31</sub>H<sub>38</sub>ONa: 449.2815, found: 449.2810; [M+K]<sup>+</sup> calcd for C<sub>31</sub>H<sub>38</sub>OK: 465.2554, found: 465.2551; HPLC: Chiralpak IA, hexane/*i*-PrOH = 90:10, 1.0 mL/min, 254 nm, *t<sub>R</sub>*(major) = 4.46 min, *t<sub>R</sub>*(minor) = 3.70 min (97% ee).

#### Diastereomer 2:

Blue oil, *R<sub>f</sub>* (silica, Hex:EtOAc 10/1): 0.28; <sup>1</sup>H NMR (400 MHz, CDCl<sub>3</sub>): δ 8.01 (d, *J* = 2.2 Hz, 1H), 7.98 (s, 1H), 7.23 – 7.14 (m, 3H), 7.04 (d, *J* = 7.8 Hz, 2H), 6.76 (d, *J* = 10.7 Hz, 1H), 5.54 (d, *J* = 11.4 Hz, 1H), 3.18 – 3.05 (m, 4H), 2.95 (h, *J* = 6.9 Hz, 1H), 2.63 (s, 3H), 2.48 – 2.35 (m, 1H), 2.32 – 2.19 (m, 4H), 2.00 – 1.74 (m, 4H), 1.68 – 1.59 (m, 1H), 1.34 – 1.24 (m, 8H), 0.76 (t, *J* = 7.4 Hz, 3H). <sup>13</sup>C NMR (100 MHz, CDCl<sub>3</sub>): δ 214.24, 144.36, 140.43, 139.66, 138.22, 136.78, 135.59, 134.50, 133.54, 132.81, 129.41, 127.91, 127.62, 126.91, 125.34, 63.66, 45.59, 40.59, 40.09, 37.57, 28.54, 25.29, 24.58, 24.54, 24.03, 22.86, 20.96, 13.33, 11.71. IR (ATR): *v*<sub>max</sub> 2961 (m), 2929 (m), 2872 (m), 1706 (s), 1544 (m), 1513 (m), 1460 (m), 1375 (m), 1307 (m), 1109 (m), 1086 (m), 1021 (m), 814 (m), 741 (m), 658 (m), 558 (m), 505 (m) cm<sup>-1</sup>. HRMS (HESI): *m/z* [M+H]<sup>+</sup> calcd for C<sub>31</sub>H<sub>39</sub>O: 427.2995, found: 427.2991; [M+Na]<sup>+</sup> calcd for C<sub>31</sub>H<sub>38</sub>ONa: 449.2815, found: 449.2812; [M+K]<sup>+</sup> calcd for C<sub>31</sub>H<sub>38</sub>OK: 465.2554, found: 465.2551; HPLC: Chiralpak IA, hexane/*i*-PrOH = 90:10, 1.0 mL/min, 254 nm, *t<sub>R</sub>*(major) = 6.26 min, *t<sub>R</sub>*(minor) = 3.94 min (97% ee).

### 7-isopropyl-1,4-dimethyl-3-(1-(p-tolyl)propyl)azulene (6a)

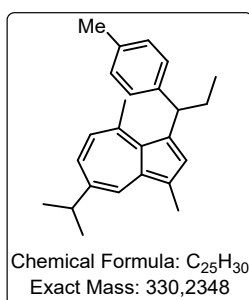

Following the *General procedure 2* using carbocation **2a** (388 mg, 1.0 mmol, 2.0 eq). This side-product product was isolated by flash chromatography (silica gel, Hex:EtOAc 40:1 to 10:1).

Blue oil, *R<sub>f</sub>* (silica, Hex:EtOAc 40/1): 0.40; **<sup>1</sup>H NMR** (400 MHz, CDCl<sub>3</sub>): δ 8.05 (d, *J* = 2.2 Hz, 1H), 7.66 (s, 1H), 7.19 (dd, *J* = 10.7, 2.2 Hz, 1H), 7.03 (s, 4H), 6.75 (d, *J* = 10.7 Hz, 1H), 4.81 (t, *J* = 7.6 Hz, 1H), 2.99 (p, *J* = 6.9 Hz, 1H), 2.92 (s, 3H), 2.64 (s, 3H), 2.27 (s, 3H), 2.14 (pd, *J* = 7.3, 1.7 Hz, 2H), 1.33 (s, 3H), 1.31 (s, 3H), 0.94 (t, *J* = 7.3 Hz, 3H). **<sup>13</sup>C NMR** (100 MHz, CDCl<sub>3</sub>): δ 145.02, 144.54, 138.88, 137.81, 137.78, 134.76, 134.33, 133.18, 132.61, 130.66, 128.92 (2 × C<sub>Ar</sub>), 128.25 (2 × C<sub>Ar</sub>), 126.45, 124.54, 46.80, 37.61, 31.94, 27.94, 24.60 (2 × CH<sub>3</sub>), 20.96, 13.50, 13.24. **IR** (ATR): *v*<sub>max</sub> 2960 (s), 2928 (m), 2871 (m), 1688 (w), 1544 (m), 1511 (s), 1460 (s), 1451 (s), 1373 (m), 1021 (m), 910 (m), 810 (s), 800 (s), 732 (s), 542 (m), 509 (m) cm<sup>-1</sup>. **HRMS** (HESI): *m/z* [M+H]<sup>+</sup> calcd for C<sub>25</sub>H<sub>31</sub>: 331.2420, found: 331.2418

### 3-ethyl-2-((5-isopropyl-3,8-dimethylazulen-1-yl)(4-methoxyphenyl)methyl)cyclohexan-1-one (5ab)

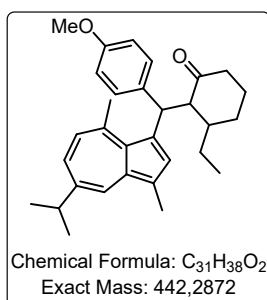

Following the *General procedure 2* using carbocation **2b** (404 mg, 1.0 mmol, 2.0 eq). Based on <sup>1</sup>H NMR analysis of the crude reaction mixture, the diastereomeric ratio was 1:1. The crude product was purified by flash chromatography (silica gel, Hex:EtOAc 40:1 to 10:1). Isolated: 144 mg (65%)

#### Diastereomer 1:

Blue oil, *R<sub>f</sub>* (silica, Hex:EtOAc 10/1): 0.28; **<sup>1</sup>H NMR** (400 MHz, CDCl<sub>3</sub>): δ 8.01 (d, *J* = 2.2 Hz, 1H), 7.97 (s, 1H), 7.25 – 7.21 (m, 2H), 7.18 (dd, *J* = 10.7, 2.2 Hz, 1H), 6.82 – 6.72 (m, 3H, overlaying signals), 5.52 (d, *J* = 11.4 Hz, 1H), 3.73 (s, 3H), 3.14 – 3.06 (m, 4H, overlaying signals), 2.97 (p, *J* = 6.8 Hz, 1H), 2.63 (s, 3H), 2.45 – 2.35 (m, 1H), 2.31 – 2.20 (m, 1H), 2.01 – 1.79 (m, 4H), 1.70 – 1.60 (m, 1H), 1.31 – 1.25 (m, 8H, overlaying signals), 0.76 (t, *J* = 7.4 Hz, 3H). **<sup>13</sup>C NMR** (100 MHz, CDCl<sub>3</sub>): δ 214.40, 157.72, 143.65, 139.50, 139.36, 137.77, 136.39, 134.26, 133.48, 132.35, 129.57 (2 × C<sub>Ar</sub>), 126.87, 126.81, 124.90, 113.95 (2 × C<sub>Ar</sub>), 63.49, 55.20, 44.65, 41.01, 39.65, 37.56, 28.38, 24.85, 24.56, 24.53, 23.88, 23.77, 13.23, 11.74. **IR** (ATR): *v*<sub>max</sub> 2959 (m), 2931 (m), 2869 (m), 1703 (s), 1608 (m), 1510 (s), 1460 (m), 1303 (m), 1251 (s), 1177 (s), 1033 (m), 909 (m), 830 (m), 729 (s), 646 (m), 531 (m) cm<sup>-1</sup>. **HRMS** (HESI): *m/z* [M+H]<sup>+</sup> calcd for C<sub>31</sub>H<sub>39</sub>O<sub>2</sub>: 443.2945, found: 443.2940; [M+Na]<sup>+</sup> calcd for C<sub>31</sub>H<sub>38</sub>O<sub>2</sub>Na: 465.2764, found: 465.2759; [M+K]<sup>+</sup> calcd for C<sub>31</sub>H<sub>38</sub>O<sub>2</sub>K: 481.2503, found: 481.2499; **HPLC**: Chiralpak IA, hexane/*i*-PrOH = 90:10, 1.0 mL/min, 254 nm, *t<sub>R</sub>*(major) = 4.19 min, *t<sub>R</sub>*(minor) = 5.27 min (98% ee).

### Diastereomer 2:

**R<sub>f</sub>** (silica, Hex:EtOAc 10/1): 0.14; **<sup>1</sup>H NMR** (400 MHz, CDCl<sub>3</sub>): δ 8.06 (d, *J* = 2.2 Hz, 1H), 7.78 (s, 1H), 7.25 – 7.20 (m, 1H), 7.19 – 7.11 (m, 2H), 6.82 (d, *J* = 10.7 Hz, 1H), 6.76 – 6.69 (m, 2H), 5.49 (d, *J* = 11.7 Hz, 1H), 3.68 (s, 3H), 3.22 (d, *J* = 11.7 Hz, 1H), 3.15 (s, 3H), 3.00 (p, *J* = 6.9 Hz, 1H), 2.73 (dt, *J* = 13.5, 6.7 Hz, 1H), 2.66 (s, 3H), 2.24 (dd, *J* = 13.3, 3.9 Hz, 1H), 2.08 – 1.92 (m, 2H), 1.89 – 1.78 (m, 2H), 1.50 – 1.41 (m, 1H), 1.40 – 1.22 (m, 8H, overlaying signals), 0.82 (t, *J* = 7.3 Hz, 3H). **<sup>13</sup>C NMR** (100 MHz, CDCl<sub>3</sub>): δ 214.26, 157.70, 144.36, 139.69, 138.17, 136.67, 135.65, 134.55, 133.59, 132.73, 129.00 (2 × C<sub>Ar</sub>), 127.79, 126.91, 125.37, 114.09 (2 × C<sub>Ar</sub>), 63.72, 55.08, 45.16, 40.60, 40.09, 37.57, 28.50, 25.29, 24.58, 24.53, 24.03, 22.87, 13.32, 11.71. **IR** (ATR): ν<sub>max</sub> 2960 (m), 2932 (m), 2874 (m), 1703 (s), 1610 (m), 1511 (s), 1460 (m), 1304 (m), 1250 (s), 1178 (s), 1033 (s), 909 (m), 828 (m), 729 (s), 646 (m), 560 (m), 536 (m) cm<sup>-1</sup>. **HRMS** (HESI): *m/z* [M+H]<sup>+</sup> calcd for C<sub>31</sub>H<sub>39</sub>O<sub>2</sub>: 443.2945, found: 443.2941; [M+Na]<sup>+</sup> calcd for C<sub>31</sub>H<sub>38</sub>O<sub>2</sub>Na: 465.2764, found: 465.2760; [M+K]<sup>+</sup> calcd for C<sub>31</sub>H<sub>38</sub>O<sub>2</sub>K: 481.2503, found: 481.2500; **HPLC**: Chiralpak IA, hexane/*i*-PrOH = 90:10, 1.0 mL/min, 254 nm, t<sub>R</sub>(major) = 12.39 min, t<sub>R</sub>(minor) = 5.03 min (96% ee).

### 7-isopropyl-3-(1-(4-methoxyphenyl)propyl)-1,4-dimethylazulene (6b)

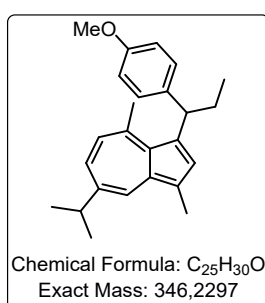

Following the *General procedure 2* using carbocation 2b (404 mg, 1.0 mmol, 2.0 eq). This side-product product was isolated by flash chromatography (silica gel, Hex:EtOAc 40:1 to 10:1).

**R<sub>f</sub>** (silica, Hex:EtOAc 40/1): 0.31; **<sup>1</sup>H NMR** (400 MHz, CDCl<sub>3</sub>): δ 8.05 (d, *J* = 2.2 Hz, 1H), 7.65 (s, 1H), 7.20 (dd, *J* = 10.7, 2.2 Hz, 1H), 7.08 – 7.02 (m, 2H), 6.81 – 6.73 (m, 3H, overlaying signals), 4.79 (t, *J* = 7.5 Hz, 1H), 3.74 (s, 3H), 3.00 (p, *J* = 6.9 Hz, 1H), 2.92 (s, 3H), 2.64 (s, 3H), 2.19 – 2.06 (m, 2H), 1.33 (s, 3H), 1.32 (s, 3H), 0.93 (t, *J* = 7.3 Hz, 3H). **<sup>13</sup>C NMR** (100 MHz, CDCl<sub>3</sub>): δ 157.31, 145.02, 139.76, 138.88, 137.71 (2 × C<sub>Ar</sub>), 134.35, 133.19, 132.54, 130.77, 129.22 (2 × C<sub>Ar</sub>), 126.43, 124.53, 113.57 (2 × C<sub>Ar</sub>), 55.19, 46.34, 37.58, 31.98, 27.86, 24.58 (2 × CH<sub>3</sub>), 13.45, 13.21. **IR** (ATR): ν<sub>max</sub> 2965 (w), 2935 (w), 2878 (w), 1687 (w), 1611 (m), 1513 (s), 1460 (m), 1378 (m), 1303 (m), 1250 (s), 1179 (s), 1033 (s), 829 (s) cm<sup>-1</sup>. **HRMS** (HESI): *m/z* [M+H]<sup>+</sup> calcd for C<sub>25</sub>H<sub>31</sub>O: 347.2369, found: 347.2363

### 2-((4-(dimethylamino)phenyl)(5-isopropyl-3,8-dimethylazulen-1-yl)methyl)-3-ethylcyclohexan-1-one (5ac)

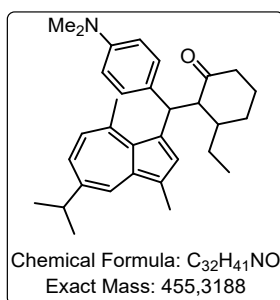

Following the *General procedure 2* using carbocation 2c (417 mg, 1.0 mmol, 2.0 eq). Based on <sup>1</sup>H NMR analysis of the crude reaction mixture, the diastereomeric ratio was 3:2. The crude product was purified by flash chromatography (silica gel, Hex:EtOAc 40:1 to 10:1). Isolated: 109 mg (49%)

#### Diastereomer 1:

**R<sub>f</sub>** (silica, Hex:EtOAc 10/1): 0.26; **<sup>1</sup>H NMR** (400 MHz, CDCl<sub>3</sub>): δ 7.99 (d, *J* = 2.2 Hz, 1H), 7.96 (s, 1H), 7.20 – 7.13 (m, 3H, overlaying signals), 6.74 (d, *J* = 10.7 Hz, 1H), 6.66 – 6.60 (m, 2H), 5.48 (d, *J* = 11.5 Hz, 1H), 3.15 – 3.06 (m, 4H, overlaying signals), 2.96 (p, *J* = 6.9 Hz, 1H), 2.86 (s, 6H), 2.62 (s, 3H), 2.41 (td, *J* = 12.8, 6.3 Hz, 1H), 2.27 (tt, *J* = 13.7, 4.4 Hz, 1H), 2.00 – 1.75 (m, 4H), 1.63 (d, *J* = 14.5 Hz, 1H), 1.30 – 1.26 (m, 8H, overlaying signals), 0.77 (t, *J* = 7.3 Hz, 3H). **<sup>13</sup>C NMR** (100 MHz, CDCl<sub>3</sub>): δ 214.72, 148.83, 143.67, 139.41, 139.25, 137.78, 134.06, 133.30, 132.22, 129.21 (2 × C<sub>Ar</sub>), 127.37, 126.69, 124.81, 112.85 (2 × C<sub>Ar</sub>), 63.59, 44.56, 40.97, 40.64 (2 × CH<sub>3</sub>), 39.63, 37.54, 28.39, 24.85, 24.56, 24.53, 23.75, 23.71, 13.22, 11.76. **IR** (ATR): ν<sub>max</sub> 2959 (m), 2929 (m), 2871 (w), 1704 (s), 1611 (m), 1519 (s), 1455 (m), 1343 (m), 817 (m) cm<sup>-1</sup>. **HRMS** (HESI): *m/z* [M+H]<sup>+</sup> calcd for C<sub>32</sub>H<sub>42</sub>NO: 456.3261, found: 456.3258; [M+Na]<sup>+</sup> calcd for C<sub>32</sub>H<sub>41</sub>NONa: 478.3080, found: 478.3076; [M+K]<sup>+</sup> calcd for C<sub>32</sub>H<sub>41</sub>NOK: 494.2820, found: 494.2817; **HPLC**: Chiralpak IA, hexane/*i*-PrOH = 90:10, 1.0 mL/min, 254 nm, t<sub>R</sub>(major) = 5.05 min, t<sub>R</sub>(minor) = 4.04 min (97% ee).

#### Diastereomer 2:

**R<sub>f</sub>** (silica, Hex:EtOAc 10/1): 0.10; **<sup>1</sup>H NMR** (400 MHz, CDCl<sub>3</sub>): δ 8.03 (d, *J* = 2.2 Hz, 1H), 7.78 (s, 1H), 7.21 (dd, *J* = 10.6, 2.2 Hz, 1H), 7.15 – 7.05 (m, 2H), 6.80 (d, *J* = 10.7 Hz, 1H), 6.63 – 6.49 (m, 2H), 5.45 (d, *J* = 11.7 Hz, 1H), 3.23 (d, *J* = 11.7 Hz, 1H), 3.16 (s, 3H), 2.99 (p, *J* = 6.9 Hz, 1H), 2.82 (s, 6H), 2.74 (td, *J* = 13.5, 6.7 Hz, 1H), 2.65 (s, 3H), 2.28 – 2.18 (m, 1H), 2.09 – 1.90 (m, 2H), 1.89 – 1.74 (m, 2H), 1.47 – 1.40 (m, 1H), 1.40 – 1.26 (m, 8H, overlaying signals), 0.82 (t, *J* = 7.4 Hz, 3H). **<sup>13</sup>C NMR** (100 MHz, CDCl<sub>3</sub>): δ 214.46, 148.81, 144.42, 139.41, 138.15, 136.79, 134.36, 133.39, 132.60, 131.39, 128.60 (2 × C<sub>Ar</sub>), 128.40, 126.71, 125.24, 112.94 (2 × C<sub>Ar</sub>), 63.69, 45.03, 40.67, 40.55 (2 × CH<sub>3</sub>), 40.03, 37.55, 28.52, 25.28, 24.58, 24.53, 24.05, 22.95, 13.32, 11.71. **IR** (ATR): ν<sub>max</sub> 2962 (w), 2932 (w), 2865 (w), 1712 (m), 1613 (m), 1522 (s), 1459 (m), 1359 (m), 1228 (m), 1168 (m), 1108 (m), 809 (s), 754 (m), 647 (m), 556 (m) cm<sup>-1</sup>. **HRMS** (HESI): *m/z* [M+H]<sup>+</sup> calcd for C<sub>32</sub>H<sub>42</sub>NO: 456.3261, found: 456.3257; [M+Na]<sup>+</sup> calcd for C<sub>32</sub>H<sub>41</sub>NONa: 478.3080, found: 478.3074; [M+K]<sup>+</sup> calcd for C<sub>32</sub>H<sub>41</sub>NOK: 494.2820, found: 494.2816; **HPLC**: Chiralpak IA, hexane/*i*-PrOH = 90:10, 1.0 mL/min, 254 nm, t<sub>R</sub>(major) = 8.73 min, t<sub>R</sub>(minor) = 4.68 min (97% ee).

#### 4-(1-(5-isopropyl-3,8-dimethylazulen-1-yl)propyl)-*N,N*-dimethylaniline (6c)

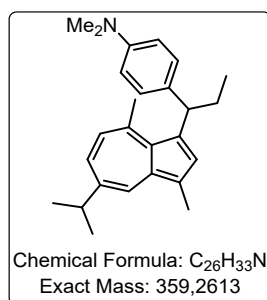

Following the *General procedure 2* using carbocation **2c** (417 mg, 1.0 mmol, 2.0 eq). This side-product product was isolated by flash chromatography (silica gel, Hex:EtOAc 40:1 to 10:1).

**R<sub>f</sub>** (silica, Hex:EtOAc 40/1): 0.17; **<sup>1</sup>H NMR** (400 MHz, CDCl<sub>3</sub>): δ 8.03 (d, *J* = 2.2 Hz, 1H), 7.66 (s, 1H), 7.18 (dd, *J* = 10.7, 2.2 Hz, 1H), 7.04 – 6.98 (m, 2H), 6.74 (d, *J* = 10.7 Hz, 1H), 6.67 – 6.60 (m, 2H), 4.75 (t, *J* = 7.6 Hz, 1H), 2.99 (p, *J* = 6.9 Hz, 1H), 2.93 (s, 3H), 2.87 (s, 6H), 2.63 (s, 3H), 2.12 (p, *J* = 7.4 Hz, 2H), 1.33 (s, 3H), 1.31 (s, 3H), 0.93 (t, *J* = 7.3 Hz, 3H). **<sup>13</sup>C NMR** (100 MHz, CDCl<sub>3</sub>): δ 148.56, 145.10, 138.68, 137.86, 137.74, 135.88, 134.21, 133.05, 132.51, 131.38, 128.92 (2 × C<sub>Ar</sub>), 126.30, 124.47, 112.78 (2 × C<sub>Ar</sub>), 46.17, 40.83 (2 × CH<sub>3</sub>), 37.60, 31.94, 27.90, 24.61 (2 × CH<sub>3</sub>), 13.52, 13.24. **IR** (ATR): ν<sub>max</sub> 2959 (m), 2930 (m), 2870 (m), 2799 (w), 1613 (m), 1518 (s), 1461 (m), 1444 (m), 1344 (m), 1163 (m), 1055 (m), 947 (m), 809 (s), 732 (m), 656 (m), 548 (m) cm<sup>-1</sup>. **HRMS** (HESI): *m/z* [M+H]<sup>+</sup> calcd for C<sub>26</sub>H<sub>34</sub>N: 360.2686, found: 360.2682

### 3-ethyl-2-((5-isopropyl-3,8-dimethylazulen-1-yl)(naphthalen-2-yl)methyl)cyclohexan-1-one (5ad)

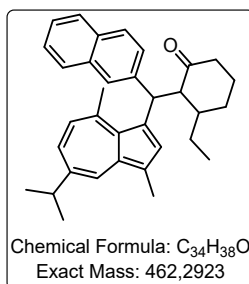

Following the *General procedure 2* using carbocation **2d** (424 mg, 1.0 mmol, 2.0 eq). Based on <sup>1</sup>H NMR analysis of the crude reaction mixture, the diastereomeric ratio was 1.2:1. The crude product was purified by flash chromatography (silica gel, Hex:EtOAc 40:1 to 10:1). Isolated: 110 mg (48%)

#### Diastereomer 1:

Blue oil, *R<sub>f</sub>* (silica, Hex:EtOAc 10/1): 0.36; <sup>1</sup>H NMR (400 MHz, CDCl<sub>3</sub>): δ 8.08 (s, 1H), 8.03 (d, *J* = 2.2 Hz, 1H), 7.80 – 7.69 (m, 4H), 7.49 (dd, *J* = 8.6, 1.8 Hz, 1H), 7.46 – 7.36 (m, 2H), 7.18 (dd, *J* = 10.7, 2.2 Hz, 1H), 6.78 (d, *J* = 10.7 Hz, 1H), 5.76 (d, *J* = 11.4 Hz, 1H), 3.26 (d, *J* = 11.3 Hz, 1H), 3.18 (s, 3H), 2.96 (hept, *J* = 7.4, 6.9 Hz, 1H), 2.66 (s, 3H), 2.52 – 2.32 (m, 2H), 2.05 – 1.94 (m, 2H), 1.93 – 1.82 (m, 2H), 1.70 – 1.63 (m, 1H), 1.30 – 1.25 (m, 8H, overlaying signals), 0.71 (t, *J* = 7.3 Hz, 3H). <sup>13</sup>C NMR (100 MHz, CDCl<sub>3</sub>): δ 214.13, 143.66, 141.64, 139.67, 139.55, 137.90, 134.33, 133.54, 133.43, 132.68, 132.04, 128.42, 127.76, 127.55, 127.20, 127.03, 126.72, 126.18, 125.93, 125.51, 124.97, 63.06, 45.55, 41.05, 39.74, 37.56, 28.52, 24.83, 24.55, 24.52, 23.98, 23.76, 13.27, 11.64. IR (ATR): *v*<sub>max</sub> 3051 (w), 2959 (m), 2932 (m), 2869 (m), 1703 (s), 1460 (m), 1365 (m), 908 (m), 816 (m), 747 (m), 728 (s), 477 (s) cm<sup>-1</sup>. HRMS (HESI): *m/z* [M+H]<sup>+</sup> calcd for C<sub>34</sub>H<sub>39</sub>O: 463.2995, found: 463.2992; [M+Na]<sup>+</sup> calcd for C<sub>34</sub>H<sub>38</sub>ONa: 485.2815, found: 485.2812; [M+K]<sup>+</sup> calcd for C<sub>34</sub>H<sub>38</sub>OK: 501.2554, found: 501.2553; HPLC: Chiralpak IA, hexane/*i*-PrOH = 90:10, 1.0 mL/min, 254 nm, *t<sub>R</sub>*(major) = 5.27 min, *t<sub>R</sub>*(minor) = 4.03 min (97% ee).

#### Diastereomer 2:

Blue oil, *R<sub>f</sub>* (silica, Hex:EtOAc 10/1): 0.25; <sup>1</sup>H NMR (400 MHz, CDCl<sub>3</sub>): δ 8.07 (d, *J* = 2.2 Hz, 1H), 7.89 (s, 1H), 7.73 – 7.63 (m, 4H, overlaying signals), 7.46 (dd, *J* = 8.5, 1.9 Hz, 1H), 7.35 (pd, *J* = 6.9, 1.5 Hz, 2H), 7.25 – 7.21 (m, 1H), 6.83 (d, *J* = 10.7 Hz, 1H), 5.71 (d, *J* = 11.7 Hz, 1H), 3.37 (d, *J* = 11.6 Hz, 1H), 3.22 (s, 3H), 3.00 (h, *J* = 6.9 Hz, 1H), 2.81 (td, *J* = 13.5, 6.8 Hz, 1H), 2.69 (s, 3H), 2.29 – 2.18 (m, 1H), 2.12 – 1.82 (m, 4H), 1.49 (d, *J* = 14.1 Hz, 1H), 1.42 – 1.35 (m, 1H), 1.34 – 1.26 (m, 7H, overlaying signals), 0.85 (t, *J* = 7.3 Hz, 3H). <sup>13</sup>C NMR (100 MHz, CDCl<sub>3</sub>): δ 213.93, 144.36, 140.95, 139.86, 138.30, 136.87, 134.61, 133.65, 133.51, 133.06, 132.09, 128.54, 127.78, 127.57, 127.17, 127.07, 126.42, 126.36, 125.80, 125.44 (2 × C<sub>Ar</sub>), 63.37, 46.06, 40.65, 40.14, 37.57, 28.66, 25.31, 24.57, 24.53, 24.13, 22.94, 13.37, 11.75. IR (ATR): *v*<sub>max</sub> 3054 (w), 2962 (m), 2931 (m), 2875 (m), 1702 (s), 1460 (m), 1366 (m), 909 (m), 816 (m), 729 (s), 477 (s) cm<sup>-1</sup>. HRMS (HESI): *m/z* [M+H]<sup>+</sup> calcd for C<sub>34</sub>H<sub>39</sub>O: 463.2995, found: 463.2991; [M+Na]<sup>+</sup> calcd for C<sub>34</sub>H<sub>38</sub>ONa: 485.2815, found: 485.2813; [M+K]<sup>+</sup> calcd for C<sub>34</sub>H<sub>38</sub>OK: 501.2554, found: 501.2553; HPLC: Chiralpak IA, hexane/*i*-PrOH = 90:10, 1.0 mL/min, 254 nm, *t<sub>R</sub>*(major) = 9.33 min, *t<sub>R</sub>*(minor) = 4.90 min (97% ee).

### 7-isopropyl-1,4-dimethyl-3-(1-(naphthalen-2-yl)propyl)azulene (6d)

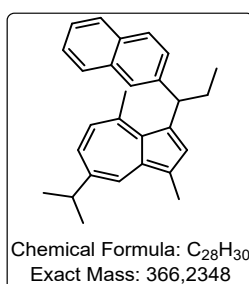

Following the *General procedure 2* using carbocation **2d** (424 mg, 1.0 mmol, 2.0 eq). This side-product product was isolated by flash chromatography (silica gel, Hex:EtOAc 40:1 to 10:1).

**R<sub>f</sub>** (silica, Hex:EtOAc 40/1): 0.34; **<sup>1</sup>H NMR** (400 MHz, CDCl<sub>3</sub>): δ 8.08 (d, *J* = 2.2 Hz, 1H), 7.80 – 7.67 (m, 4H), 7.55 (s, 1H), 7.43 – 7.33 (m, 3H), 7.21 (dd, *J* = 10.8, 2.2 Hz, 1H), 6.77 (d, *J* = 10.7 Hz, 1H), 5.01 (t, *J* = 7.5 Hz, 1H), 3.01 (p, *J* = 6.9 Hz, 1H), 2.96 (s, 3H), 2.65 (s, 3H), 2.30 – 2.20 (m, 2H), 1.34 (s, 3H), 1.32 (s, 3H), 0.99 (t, *J* = 7.3 Hz, 3H). **<sup>13</sup>C NMR** (100 MHz, CDCl<sub>3</sub>): δ 145.03, 145.00, 139.03, 137.98, 137.81, 134.40, 133.58, 133.26, 131.81, 130.21, 127.76, 127.71, 127.55, 127.49, 126.56, 126.28, 125.67, 125.08, 124.61, 47.32, 37.59, 31.75, 29.71, 27.97, 24.58 (2 × CH<sub>3</sub>), 13.49, 13.22. **IR** (ATR):  $\nu_{\max}$  3058 (w), 2959 (m), 2925 (m), 2857 (m), 1460 (m), 1372 (m), 856 (m), 815 (s), 744 (s), 477 (s) cm<sup>-1</sup>; **HRMS** (HESI): *m/z* [M+H]<sup>+</sup> calcd for C<sub>28</sub>H<sub>31</sub>: 367.2420, found: 367.2418; [M+Na]<sup>+</sup> calcd for C<sub>28</sub>H<sub>30</sub>Na: 389.2240, found: 389.2240

### 3-ethyl-2-((4-fluorophenyl)(5-isopropyl-3,8-dimethylazulen-1-yl)methyl)cyclohexan-1-one (5ae)

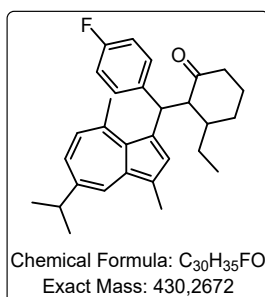

Following the *General procedure 2* using carbocation **2e** (392 mg, 1.0 mmol, 2.0 eq). Based on <sup>1</sup>H NMR analysis of the crude reaction mixture, the diastereomeric ratio was 1:1. The crude product was purified by flash chromatography (silica gel, Hex:EtOAc 40:1 to 10:1). Isolated: 163 mg (76%)

#### Diastereomer 1:

**R<sub>f</sub>** (silica, Hex:EtOAc 10/1): 0.33; **<sup>1</sup>H NMR** (400 MHz, CDCl<sub>3</sub>): δ 8.03 (d, *J* = 2.2 Hz, 1H), 7.96 (s, 1H), 7.31 – 7.26 (m, 2H), 7.21 (dd, *J* = 10.7, 2.2 Hz, 1H), 6.98 – 6.89 (m, 2H), 6.79 (d, *J* = 10.7 Hz, 1H), 5.57 (d, *J* = 11.3 Hz, 1H), 3.14 – 3.05 (m, 4H, overlaying signals), 2.97 (dq, *J* = 13.2, 6.6 Hz, 1H), 2.64 (s, 3H), 2.39 (td, *J* = 13.2, 12.5, 6.8 Hz, 1H), 2.24 (tt, *J* = 13.7, 4.4 Hz, 1H), 2.01 – 1.88 (m, 2H), 1.88 – 1.77 (m, 2H), 1.69 – 1.61 (m, 1H), 1.33 – 1.26 (m, 8H, overlaying signals), 0.76 (t, *J* = 7.4 Hz, 3H). **<sup>13</sup>C NMR** (100 MHz, CDCl<sub>3</sub>): δ 213.93, 161.10 (d, *J* = 244.6 Hz), 143.57, 140.03 (d, *J* = 3.4 Hz), 139.78, 139.26, 137.79, 134.43, 133.66, 132.49, 130.04 (d, *J* = 8.0 Hz, 2 × C<sub>Ar</sub>), 127.06, 126.10, 125.01, 115.35 (d, *J* = 21.2 Hz, 2 × C<sub>Ar</sub>), 63.32, 44.65, 41.02, 39.66, 37.56, 28.35, 24.84, 24.55, 24.52, 24.04, 23.74, 13.21, 11.69. **<sup>19</sup>F NMR** (376 MHz, CDCl<sub>3</sub>): δ -116.98 (ddd, *J* = 13.8, 8.8, 5.4 Hz). **IR** (ATR):  $\nu_{\max}$  2963 (m), 2930 (m), 2871 (m), 1704 (s), 1508 (s), 1461 (m), 1224 (s), 1159 (m), 837 (m), 517 (m) cm<sup>-1</sup>. **HRMS** (HESI): *m/z* [M+H]<sup>+</sup> calcd for C<sub>30</sub>H<sub>36</sub>FO: 431.2745, found: 431.2740; [M+Na]<sup>+</sup> calcd for C<sub>30</sub>H<sub>35</sub>FONa: 453.2564, found: 453.2561; [M+K]<sup>+</sup> calcd for C<sub>30</sub>H<sub>35</sub>FOK: 469.2304, found: 469.2306; **HPLC**: Chiralpak IA, hexane/*i*-PrOH = 90:10, 1.0 mL/min, 254 nm, *t<sub>R</sub>*(major) = 4.91 min, *t<sub>R</sub>*(minor) = 3.81 min (97% ee).

#### Diastereomer 2:

**R<sub>f</sub>** (silica, Hex:EtOAc 10/1): 0.25; **<sup>1</sup>H NMR** (400 MHz, CDCl<sub>3</sub>): δ 8.08 (d, *J* = 2.2 Hz, 1H), 7.76 (s, 1H), 7.27 – 7.24 (m, 1H), 7.23 – 7.17 (m, 2H), 6.93 – 6.80 (m, 3H, overlaying signals), 5.52 (d, *J* = 11.8 Hz, 1H), 3.20 (d, *J* = 11.7 Hz, 1H), 3.13 (s, 3H), 3.01 (p, *J* = 6.9 Hz, 1H), 2.74 – 2.62 (m, 4H, overlaying signals), 2.31 – 2.21 (m, 1H), 2.06 – 1.92 (m, 2H), 1.90 – 1.77 (m, 2H), 1.51 – 1.42 (m, 1H), 1.41 – 1.26 (m, 8H, overlaying signals), 0.83 (t, *J* = 7.3 Hz, 3H). **<sup>13</sup>C NMR** (100 MHz, CDCl<sub>3</sub>): δ 213.99, 161.08 (d, *J* = 245.1 Hz), 144.25, 139.98, 139.30 (d, *J* = 3.2 Hz), 138.20, 136.51, 134.71, 133.78, 132.84, 129.52 (d, *J* = 7.9 Hz, 2 × C<sub>Ar</sub>), 127.10, 127.06, 125.50, 115.50 (d, *J* = 21.2 Hz, 2 × C<sub>Ar</sub>), 63.66, 45.21, 40.51, 40.12, 37.58, 28.48, 25.28, 24.57, 24.52, 24.01, 22.77, 13.30, 11.69. **<sup>19</sup>F NMR** (376 MHz, CDCl<sub>3</sub>): δ -116.78 (tt, *J* = 8.5, 5.2 Hz). **IR** (ATR):  $\nu_{\max}$  2962 (m), 2934 (m), 2875 (m), 1704 (s), 1604 (m), 1509 (s), 1461 (m), 1224 (s), 1159 (m), 909 (m), 833 (s), 730 (s), 556 (m) cm<sup>-1</sup>. **HRMS** (HESI): *m/z* [M+H]<sup>+</sup> calcd for C<sub>30</sub>H<sub>36</sub>FO:



431.2745, found: 431.2740;  $[M+Na]^+$  calcd for  $C_{30}H_{35}FONa$ : 453.2564, found: 453.2564;  $[M+K]^+$  calcd for  $C_{30}H_{35}FOK$ : 469.2304, found: 469.2302; **HPLC**: Chiralpak IA, hexane/*i*-PrOH = 90:10, 1.0 mL/min, 254 nm,  $t_R$ (major) = 7.73 min,  $t_R$ (minor) = 4.10 min (97% ee).

### 3-(1-(4-fluorophenyl)propyl)-7-isopropyl-1,4-dimethylazulene (6e)

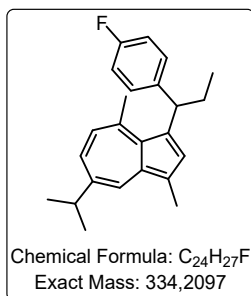

Following the *General procedure 2* using carbocation **2e** (392 mg, 1.0 mmol, 2.0 eq). This side-product product was isolated by flash chromatography (silica gel, Hex:EtOAc 40:1 to 10:1).

$R_f$  (silica, Hex:EtOAc 40/1): 0.17;  **$^1H$  NMR** (400 MHz,  $CDCl_3$ ):  $\delta$  8.07 (d,  $J = 2.2$  Hz, 1H), 7.64 (s, 1H), 7.22 (dd,  $J = 10.7, 2.2$  Hz, 1H), 7.09 (dd,  $J = 8.5, 5.6$  Hz, 2H), 6.90 (t,  $J = 8.7$  Hz, 2H), 6.77 (d,  $J = 10.7$  Hz, 1H), 4.82 (t,  $J = 7.6$  Hz, 1H), 3.00 (p,  $J = 7.0$  Hz, 1H), 2.90 (s, 3H), 2.64 (s, 3H), 2.13 (dq,  $J = 15.9, 6.9$  Hz, 2H), 1.33 (s, 3H), 1.32 (s, 3H), 0.94 (t,  $J = 7.3$  Hz, 3H).  **$^{13}C$  NMR** (100 MHz,  $CDCl_3$ ):  $\delta$  160.86 (d,  $J = 243.3$  Hz), 144.94, 143.22 (d,  $J = 3.0$  Hz), 139.13, 137.75, 137.56, 134.51, 133.35, 132.65, 130.05, 129.65 (d,  $J = 7.7$  Hz,  $2 \times C_{Ar}$ ), 126.61, 124.63, 114.88 (d,  $J = 21.0$  Hz,  $2 \times C_{Ar}$ ), 46.49, 37.60, 32.01, 27.85, 24.58 ( $2 \times CH_3$ ), 13.40, 13.20.  **$^{19}F$  NMR** (376 MHz,  $CDCl_3$ ):  $\delta$  -118.38 (tt,  $J = 8.9, 5.5$  Hz). **IR** (ATR):  $\nu_{max}$  2962 (m), 2933 (m), 2873 (w), 1507 (s), 1461 (m), 1221 (s), 1157 (s), 909 (m), 831 (s), 731 (s), 544 (m)  $cm^{-1}$ . **HRMS** (HESI):  $m/z$   $[M+H]^+$  calcd for  $C_{24}H_{28}F$ : 335.2170, found: 335.2164

### 2-((4-(difluoromethoxy)phenyl)(5-isopropyl-3,8-dimethylazulen-1-yl)methyl)-3-ethylcyclohexan-1-one (5af)

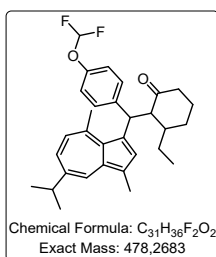

Following the *General procedure 2* using carbocation **2f** (440 mg, 1.0 mmol, 2.0 eq). Based on  $^1H$  NMR analysis of the crude reaction mixture, the diastereomeric ratio was 1:1. The crude product was purified by flash chromatography (silica gel, Hex:EtOAc 40:1 to 100:1). Isolated: 110 mg (46%)

#### Diastereomer 1:

Blue oil,  $R_f$  (silica, Hex:EtOAc 10/1): 0.35;  **$^1H$  NMR** (400 MHz,  $CDCl_3$ ):  $\delta$  8.04 (d,  $J = 2.1$  Hz, 1H), 7.96 (s, 1H), 7.34 – 7.27 (m, 2H), 7.21 (dd,  $J = 10.8, 2.2$  Hz, 1H), 7.00 (d,  $J = 8.4$  Hz, 2H), 6.79 (d,  $J = 10.8$  Hz, 1H), 6.41 (t,  $J = 74.2$  Hz, 1H), 5.58 (d,  $J = 11.3$  Hz, 1H), 3.16 – 3.07 (m, 4H, overlaying signals), 2.97 (dt,  $J = 13.8, 6.9$  Hz, 1H), 2.64 (s, 3H), 2.39 (td,  $J = 13.2, 12.6, 6.8$  Hz, 1H), 2.24 (tt,  $J = 13.8, 4.5$  Hz, 1H), 2.00 – 1.89 (m, 2H), 1.89 – 1.75 (m, 2H), 1.65 (dd,  $J = 14.5, 3.4$  Hz, 1H), 1.41 – 1.15 (m, 8H), 0.76 (t,  $J = 7.3$  Hz, 3H).  **$^{13}C$  NMR** (100 MHz,  $CDCl_3$ ):  $\delta$  213.75, 149.36 (t,  $J = 2.7$  Hz), 143.56, 141.58, 139.86, 139.24, 137.86, 134.47, 133.70, 132.52, 129.95 ( $2 \times C_{Ar}$ ), 127.12, 125.92, 125.07, 119.59 ( $2 \times C_{Ar}$ ), 115.98 (t,  $J = 259.3$  Hz), 63.22, 44.71, 41.04, 39.69, 37.57, 28.38, 24.85, 24.55, 24.52, 24.04, 23.71, 13.21, 11.68.  **$^{19}F$  NMR** (376 MHz,  $CDCl_3$ ):  $\delta$  -80.55 (dd,  $J = 74.1, 2.6$  Hz). **IR** (ATR):  $\nu_{max}$  2963 (m), 2935



(m), 2873 (w), 1704 (m), 1508 (m), 1381 (m), 1219 (m), 1123 (s), 1040 (s), 910 (m), 731 (m)  $\text{cm}^{-1}$ . **HRMS** (HESI):  $m/z$   $[\text{M}+\text{H}]^+$  calcd for  $\text{C}_{31}\text{H}_{37}\text{F}_2\text{O}_2$ : 479.2756, found: 479.2760;  $[\text{M}+\text{Na}]^+$  calcd for  $\text{C}_{31}\text{H}_{36}\text{F}_2\text{O}_2\text{Na}$ : 501.2576, found: 501.2579;  $[\text{M}+\text{K}]^+$  calcd for  $\text{C}_{31}\text{H}_{36}\text{F}_2\text{O}_2\text{K}$ : 517.2315, found: 517.2321; **HPLC**: Chiralpak IA, hexane/*i*-PrOH = 90:10, 1.0 mL/min, 254 nm,  $t_{\text{R}}$ (major) = 5.69 min,  $t_{\text{R}}$ (minor) = 4.17 min (95% ee).

#### Diastereomer 2:

Blue oil,  $R_{\text{f}}$ (silica, Hex:EtOAc 10/1): 0.25;  **$^1\text{H NMR}$**  (400 MHz,  $\text{CDCl}_3$ ):  $\delta$  8.08 (d,  $J = 2.2$  Hz, 1H), 7.76 (s, 1H), 7.29 – 7.21 (m, 3H, overlaying signals), 6.98 – 6.89 (m, 2H), 6.85 (d,  $J = 10.7$  Hz, 1H), 6.37 (t,  $J = 74.3$  Hz, 1H), 5.54 (d,  $J = 11.8$  Hz, 1H), 3.21 (d,  $J = 11.7$  Hz, 1H), 3.13 (s, 3H), 3.00 (p,  $J = 6.8$  Hz, 1H), 2.74 – 2.62 (m, 4H, overlaying signals), 2.31 – 2.21 (m, 1H), 1.99 (tdd,  $J = 13.3, 5.7, 2.5$  Hz, 2H), 1.85 (tq,  $J = 13.7, 4.2$  Hz, 2H), 1.50 – 1.43 (m, 1H), 1.41 – 1.29 (m, 8H, overlaying signals), 0.83 (t,  $J = 7.4$  Hz, 3H).  **$^{13}\text{C NMR}$**  (100 MHz,  $\text{CDCl}_3$ ):  $\delta$  213.89, 149.52 (t,  $J = 2.9$  Hz), 144.23, 140.82, 140.07, 138.27, 136.50, 134.75, 133.82, 132.88, 129.48 ( $2 \times \text{C}_{\text{Ar}}$ ), 127.17, 126.87, 125.55, 119.53 ( $2 \times \text{C}_{\text{Ar}}$ ), 116.08 (t,  $J = 258.6$  Hz), 63.56, 45.28, 40.55, 40.12, 37.59, 28.50, 26.94, 25.29, 24.56, 24.52, 24.04, 22.79, 13.30, 11.68.  **$^{19}\text{F NMR}$**  (376 MHz,  $\text{CDCl}_3$ ):  $\delta$  -80.36 (dd,  $J = 74.2, 3.2$  Hz). **IR** (ATR):  $\nu_{\text{max}}$  2963 (m), 2934 (m), 2874 (w), 1703 (m), 1509 (m), 1461 (m), 1381 (m), 1218 (m), 1122 (s), 1041 (s), 908 (m), 730 (s)  $\text{cm}^{-1}$ . **HRMS** (HESI):  $m/z$   $[\text{M}+\text{H}]^+$  calcd for  $\text{C}_{31}\text{H}_{37}\text{F}_2\text{O}_2$ : 479.2756, found: 479.2754;  $[\text{M}+\text{Na}]^+$  calcd for  $\text{C}_{31}\text{H}_{36}\text{F}_2\text{O}_2\text{Na}$ : 501.2573, found: 501.2579;  $[\text{M}+\text{K}]^+$  calcd for  $\text{C}_{31}\text{H}_{36}\text{F}_2\text{O}_2\text{K}$ : 517.2315, found: 517.2312; **HPLC**: Chiralpak IA, hexane/*i*-PrOH = 90:10, 1.0 mL/min, 254 nm,  $t_{\text{R}}$ (major) = 12.79 min,  $t_{\text{R}}$ (minor) = 4.40 min (97% ee).

### 3-(1-(4-fluorophenyl)propyl)-7-isopropyl-1,4-dimethylazulene (6f)

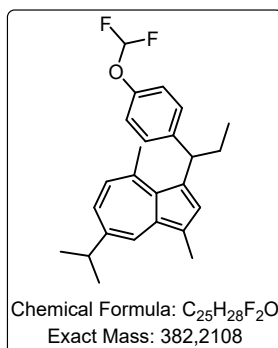

Following the *General procedure 2* using carbocation **2f** (440 mg, 1.0 mmol, 2.0 eq). This side-product product was isolated by flash chromatography (silica gel, Hex:EtOAc 100:1 to 10:1).

$R_{\text{f}}$ (silica, Hex:EtOAc 10/1): 0.73;  **$^1\text{H NMR}$**  (400 MHz,  $\text{CDCl}_3$ ):  $\delta$  8.07 (d,  $J = 2.2$  Hz, 1H), 7.64 (s, 1H), 7.26 – 7.18 (m, 1H), 7.12 (d,  $J = 8.6$  Hz, 2H), 6.97 (d,  $J = 8.3$  Hz, 2H), 6.78 (d,  $J = 10.7$  Hz, 1H), 6.42 (t,  $J = 74.4$  Hz, 1H), 4.84 (t,  $J = 7.6$  Hz, 1H), 3.00 (p,  $J = 6.9$  Hz, 1H), 2.90 (s, 3H), 2.64 (s, 3H), 2.22 – 2.04 (m, 2H), 1.33 (s, 3H), 1.32 (s, 3H), 0.94 (t,  $J = 7.3$  Hz, 3H).  **$^{13}\text{C NMR}$**  (100 MHz,  $\text{CDCl}_3$ ):  $\delta$  148.99 (t,  $J = 2.8$  Hz), 144.90, 144.85, 139.20, 137.79, 137.52, 134.52, 133.39, 132.66, 129.80, 129.58 ( $2 \times \text{C}_{\text{Ar}}$ ), 126.65, 124.66, 119.48, 119.25 ( $2 \times \text{C}_{\text{Ar}}$ ), 116.15 (t,  $J = 258.7$  Hz), 46.55, 37.59, 31.90, 27.88, 24.57, 13.40, 13.19.  **$^{19}\text{F NMR}$**  (376 MHz,  $\text{CDCl}_3$ ):  $\delta$  -80.34 (d,  $J = 74.3$  Hz). **IR** (ATR):  $\nu_{\text{max}}$  2965 (m), 2935 (m), 2875 (w), 1509 (m), 1380 (m), 1219 (m), 1123 (s), 1039 (s), 835 (m)  $\text{cm}^{-1}$ . **HRMS** (HESI):  $m/z$   $[\text{M}+\text{H}]^+$  calcd for  $\text{C}_{25}\text{H}_{29}\text{F}_2\text{O}$ : 383.2181, found: 383.2180

### 3-(ferrocenyl(2-ethyl-6-methylenecyclohexyl)methyl)-7-isopropyl-1,4-dimethylazulene (5ag)

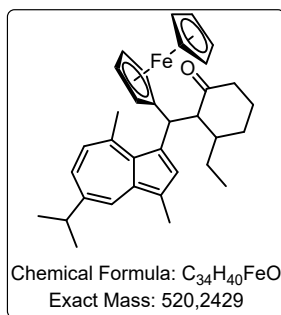

Following the *General procedure 2* using carbocation **2g** (481 mg, 1.0 mmol, 2.0 eq). Based on  $^1H$  NMR analysis of the crude reaction mixture, the diastereomeric ratio was 1:1. The crude product was purified by flash chromatography (silica gel, Hex:EtOAc 100:1 to 10:1). Isolated: 31 mg (12%)

#### Diastereomer 1:

Blue oil,  $R_f$  (silica, Hex:EtOAc 10/1): 0.43;  $^1H$  NMR (400 MHz,  $CDCl_3$ ):  $\delta$  8.03 (d,  $J = 2.2$  Hz, 1H), 7.71 (s, 1H), 7.21 (dd,  $J = 10.5, 2.2$  Hz, 1H), 6.85 (d,  $J = 10.5$  Hz, 1H), 5.16 (d,  $J = 11.1$  Hz, 1H), 4.16 (t,  $J = 2.0$  Hz, 2H), 4.12 (q,  $J = 2.1$  Hz, 1H), 4.07 (q,  $J = 2.0$  Hz, 1H), 3.56 (s, 5H), 3.30 (s, 3H), 3.00 (p,  $J = 6.9$  Hz, 1H), 2.82 (d,  $J = 11.0$  Hz, 1H), 2.65 (s, 3H), 2.26 (td,  $J = 13.3, 6.5$  Hz, 1H), 2.11 – 2.00 (m, 1H), 1.88 (s, 2H), 1.84 – 1.76 (m, 1H), 1.76 – 1.69 (m, 1H), 1.59 (s, 1H), 1.34 (s, 3H), 1.32 (s, 3H), 1.24 – 1.19 (m, 2H), 0.79 (t,  $J = 7.4$  Hz, 3H).  $^{13}C$  NMR (100 MHz,  $CDCl_3$ ):  $\delta$  213.70, 142.60, 139.64, 138.48, 138.18, 133.61 ( $2 \times C_{Ar}$ ), 130.64, 129.35, 126.67, 125.21, 95.57, 68.85, 68.47 ( $5 \times C_{Cp}$ ), 67.94, 65.69, 65.56, 64.63, 41.06, 39.63, 38.33, 37.58, 28.77, 24.91, 24.56, 24.53, 23.90, 23.06, 13.25, 11.88. IR (ATR):  $\nu_{max}$  3091 (w), 2959 (m), 2926 (s), 2861 (m), 1693 (m), 1460 (m), 1107 (m), 810 (s), 481 (s)  $cm^{-1}$ . HRMS (HESI):  $m/z$   $[M]^+$  calcd for  $C_{34}H_{40}FeO$ : 520.2423, found: 520.2424;  $[M+Na]^+$  calcd for  $C_{34}H_{40}FeONa$ : 543.2321, found: 543.2320;  $[M+K]^+$  calcd for  $C_{34}H_{40}FeOK$ : 559.2060, found: 559.2056; HPLC: Chiralpak IA, hexane/*i*-PrOH = 90:10, 1.0 mL/min, 254 nm,  $t_R$ (major) = 4.56 min,  $t_R$ (minor) = 3.86 min (97% ee).

#### Diastereomer 2:

Blue oil,  $R_f$  (silica, Hex:EtOAc 10/1): 0.35;  $^1H$  NMR (400 MHz,  $CDCl_3$ ):  $\delta$  8.10 (d,  $J = 2.1$  Hz, 1H), 7.62 (s, 1H), 7.28 (dd,  $J = 10.5, 2.2$  Hz, 1H), 6.91 (d,  $J = 10.5$  Hz, 1H), 5.11 (d,  $J = 11.4$  Hz, 1H), 4.17 – 4.09 (m, 2H), 3.99 (td,  $J = 2.4, 1.1$  Hz, 1H), 3.94 (dt,  $J = 2.6, 1.3$  Hz, 1H), 3.57 (s, 5H), 3.31 (s, 3H), 3.04 (p,  $J = 6.8$  Hz, 1H), 2.89 (d,  $J = 11.2$  Hz, 1H), 2.68 (s, 3H), 2.60 (td,  $J = 13.4, 6.6$  Hz, 1H), 2.19 (d,  $J = 13.3$  Hz, 1H), 1.95 – 1.85 (m, 2H), 1.82 – 1.70 (m, 1H), 1.46 (s, 1H), 1.37 (s, 3H), 1.36 (s, 3H), 1.35 – 1.32 (m, 1H), 1.21 – 1.14 (m, 1H), 1.14 – 1.06 (m, 1H), 0.68 (t,  $J = 7.3$  Hz, 3H).  $^{13}C$  NMR (100 MHz,  $CDCl_3$ ):  $\delta$  214.36, 143.64, 139.63, 138.32, 136.53, 134.01, 133.62, 131.71, 130.03, 126.76, 125.46, 94.35, 68.34 ( $5 \times C_{Cp}$ ), 68.25, 68.01, 66.10, 65.82, 64.86, 41.24, 39.65, 39.06, 37.57, 28.65, 25.06, 24.58, 24.55, 24.35, 23.08, 13.31, 11.54. IR (ATR):  $\nu_{max}$  3092 (w), 2958 (m), 2925 (s), 2860 (m), 1704 (s), 1544 (m), 1460 (m), 1107 (m), 816 (s), 481 (s)  $cm^{-1}$ . HRMS (HESI):  $m/z$   $[M]^+$  calcd for  $C_{34}H_{40}FeO$ : 520.2423, found: 520.2422;  $[M+Na]^+$  calcd for  $C_{34}H_{40}FeONa$ : 543.2321, found: 543.2319;  $[M+K]^+$  calcd for  $C_{34}H_{40}FeOK$ : 559.2060, found: 559.2054; HPLC: Chiralpak IA, hexane/*i*-PrOH = 90:10, 1.0 mL/min, 254 nm,  $t_R$ (major) = 5.33 min,  $t_R$ (minor) = 4.52 min (97% ee).

### 3-(1-ferrocenylpropyl)-7-isopropyl-1,4-dimethylazulene (6g)

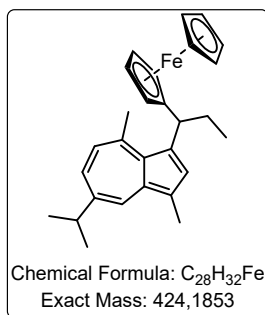

Following the *General procedure 2* using carbocation **2g** (481 mg, 1.0 mmol, 2.0 eq). This side-product product was isolated by flash chromatography (silica gel, Hex:EtOAc 100:1 to 10:1).

**R<sub>f</sub>** (silica, Hex:EtOAc 10/1): 0.87; **<sup>1</sup>H NMR** (400 MHz,  $CDCl_3$ ):  $\delta$  8.05 (d,  $J = 2.2$  Hz, 1H), 7.52 (s, 1H), 7.25 (dd,  $J = 10.7, 2.0$  Hz, 1H), 6.84 (d,  $J = 10.6$  Hz, 1H), 4.68 (dd,  $J = 10.2, 4.6$  Hz, 1H), 4.12 (dt,  $J = 2.8, 1.4$  Hz, 1H), 4.10 – 4.04 (m, 7H), 4.04 – 4.02 (m, 1H), 3.08 (s, 3H), 3.02 (q,  $J = 6.9$  Hz, 1H), 2.61 (s, 3H), 2.34 – 2.23 (m, 1H), 2.11 – 1.98 (m, 1H), 1.37 (s, 3H), 1.36 (s, 3H), 0.88 (t,  $J = 7.4$  Hz, 3H). **<sup>13</sup>C NMR** (100 MHz,  $CDCl_3$ ):  $\delta$  142.96, 138.00, 137.50, 136.44, 132.60, 131.99, 131.52, 130.18, 125.12, 123.91, 95.80, 67.42 ( $5 \times C_{cp}$ ), 66.54, 66.34, 66.08, 65.17, 38.65, 36.55, 29.82, 27.43, 23.54 ( $2 \times CH_3$ ), 12.18, 12.10. **IR** (ATR):  $\nu_{max}$  3095 (w), 2961 (m), 2930 (m), 2871 (w), 1544 (m), 1460 (m), 1106 (m), 1000 (m), 909 (m), 812 (s), 730 (s), 482 (s)  $cm^{-1}$ . **HRMS** (HESI):  $m/z$   $[M]^+$  calcd for  $C_{28}H_{32}Fe$ : 424.1848, found: 424.1850;  $[M+Na]^+$  calcd for  $C_{28}H_{32}FeNa$ : 447.1746, found: 447.1741

### 3-ethyl-2-((4-chlorophenyl)(5-isopropyl-3,8-dimethylazulen-1-yl)methyl)cyclohexan-1-one (5ah)

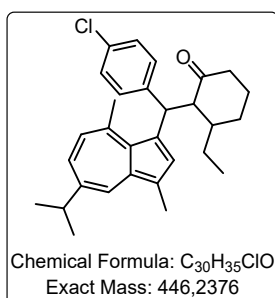

Following the *General procedure 2* using carbocation **2h** (466 mg, 1.0 mmol, 2.0 eq). Based on <sup>1</sup>H NMR analysis of the crude reaction mixture, the diastereomeric ratio was 1:1. The crude product was purified by flash chromatography (silica gel, Hex:EtOAc 100:1 to 10:1). Isolated: 18 mg (18%)

*Diastereomer 1:*

**R<sub>f</sub>** (silica, Hex:EtOAc 10/1): 0.43; **<sup>1</sup>H NMR** (600 MHz,  $CDCl_3$ ):  $\delta$  8.08 (d,  $J = 2.2$  Hz, 1H), 7.75 (s, 1H), 7.26 (dd,  $J = 10.6, 2.2$  Hz, 1H), 7.20 – 7.13 (m, 4H), 6.85 (d,  $J = 10.6$  Hz, 1H), 5.51 (d,  $J = 11.8$  Hz, 1H), 3.20 (d,  $J = 11.7$  Hz, 1H), 3.12 (s, 3H), 3.01 (hept,  $J = 6.9$  Hz, 1H), 2.67 (td,  $J = 13.6, 6.7$  Hz, 1H), 2.66 (s, 3H), 2.30 – 2.23 (m, 1H), 2.04 – 1.94 (m, 2H), 1.89 – 1.77 (m, 2H), 1.46 (d,  $J = 13.9$  Hz, 1H), 1.33 (s, 3H), 1.32 (s, 3H), 1.29 – 1.21 (m, 2H), 0.83 (t,  $J = 7.4$  Hz, 3H). **<sup>13</sup>C NMR** (150 MHz,  $CDCl_3$ ):  $\delta$  213.81, 144.18, 142.03, 140.04, 138.23, 136.47, 134.72, 133.79, 132.87, 131.89, 129.40 ( $2 \times C_{Ar}$ ), 128.81 ( $2 \times C_{Ar}$ ), 127.14, 126.65, 125.50, 63.44, 45.33, 40.49, 40.11, 37.56, 28.46, 25.25, 24.54, 24.50, 23.99, 22.74, 13.28, 11.66. **IR** (ATR):  $\nu_{max}$  2961 (m), 2930 (m), 2870 (m), 1705 (s), 1489 (m), 1461 (m), 1090 (s), 1013 (s), 822 (m), 730 (m), 649 (m)  $cm^{-1}$ . **HRMS** (HESI):  $m/z$   $[M+H]^+$  calcd for  $C_{30}H_{36}ClO$ : 447.2449, found: 447.2434;  $[M+Na]^+$  calcd for  $C_{30}H_{35}ClONa$ : 469.2269, found: 469.2258; **HPLC**: Chiralpak IA, hexane/*i*-PrOH = 90:10, 1.0 mL/min, 254 nm,  $t_R$ (major) = 4.95 min,  $t_R$ (minor) = 3.82 min (97% ee).

### Diastereomer 2:

**R<sub>f</sub>** (silica, Hex:EtOAc 10/1): 0.37; **<sup>1</sup>H NMR** (600 MHz, CDCl<sub>3</sub>): δ 8.04 (d, *J* = 2.2 Hz, 1H), 7.95 (s, 1H), 7.26 – 7.19 (m, 5H), 6.79 (d, *J* = 10.7 Hz, 1H), 5.56 (d, *J* = 11.3 Hz, 1H), 3.10 (d, *J* = 11.2 Hz, 1H), 3.08 (s, 3H), 2.98 (hept, *J* = 6.9 Hz, 1H), 2.63 (s, 3H), 2.39 (td, *J* = 13.3, 12.7, 6.8 Hz, 1H), 2.23 (tt, *J* = 13.9, 4.7 Hz, 1H), 1.98 – 1.91 (m, 2H), 1.88 – 1.77 (m, 2H), 1.68 – 1.63 (m, 1H), 1.30 (s, 3H), 1.29 (s, 3H), 1.29 – 1.27 (m, 2H), 0.77 (t, *J* = 7.3 Hz, 3H). **<sup>13</sup>C NMR** (150 MHz, CDCl<sub>3</sub>): δ 213.70, 143.52, 142.81, 139.84, 139.21, 137.82, 134.45, 133.67, 132.55, 131.74, 129.96 (2 × C<sub>Ar</sub>), 128.67 (2 × C<sub>Ar</sub>), 127.11, 125.67, 125.02, 63.08, 44.76, 41.00, 39.66, 37.55, 28.34, 24.81, 24.53, 24.50, 24.02, 23.69, 13.20, 11.65. **IR** (ATR): *v*<sub>max</sub> 2962 (m), 2929 (m), 2872 (m), 1704 (s), 1595 (m), 1491 (m), 1461 (m), 1091 (m), 1014 (m), 908 (m), 824 (m), 730 (s), 648 (m) cm<sup>-1</sup>. **HRMS** (HESI): *m/z* [M+H]<sup>+</sup> calcd for C<sub>30</sub>H<sub>36</sub>ClO: 447.2449, found: 447.2433; [M+Na]<sup>+</sup> calcd for C<sub>30</sub>H<sub>35</sub>ClONa: 469.2269, found: 469.2259; **HPLC**: Chiralpak IA, hexane/*i*-PrOH = 90:10, 1.0 mL/min, 254 nm, *t<sub>R</sub>*(major) = 6.83 min, *t<sub>R</sub>*(minor) = 4.14 min (97% ee).

### 3-(1-(4-chlorophenyl)propyl)-7-isopropyl-1,4-dimethylazulene (6h)

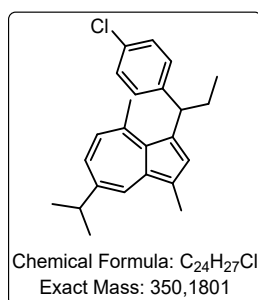

Following the *General procedure 2* using carbocation **2h** (466 mg, 1.0 mmol, 2.0 eq). This side-product product was isolated by flash chromatography (silica gel, Hex:EtOAc 100:1 to 10:1).

**R<sub>f</sub>** (silica, Hex:EtOAc 10/1): 0.90; **<sup>1</sup>H NMR** (600 MHz, CDCl<sub>3</sub>): δ 8.09 (d, *J* = 2.2 Hz, 1H), 7.65 (s, 1H), 7.24 (dd, *J* = 10.6, 2.2 Hz, 1H), 7.22 – 7.18 (m, 2H), 7.10 – 7.06 (m, 2H), 6.79 (d, *J* = 10.7 Hz, 1H), 4.83 (t, *J* = 7.6 Hz, 1H), 3.02 (p, *J* = 6.9 Hz, 1H), 2.91 (s, 3H), 2.66 (s, 3H), 2.20 – 2.08 (m, 2H), 1.35 (s, 3H), 1.34 (s, 3H), 0.96 (t, *J* = 7.3 Hz, 3H). **<sup>13</sup>C NMR** (150 MHz, CDCl<sub>3</sub>): δ 146.06, 144.89, 139.20, 137.76, 137.53, 134.54, 133.38, 132.68, 131.03, 129.69 (2 × C<sub>Ar</sub>), 129.59, 128.28 (2 × C<sub>Ar</sub>), 126.66, 124.63, 46.64, 37.59, 31.81, 27.86, 24.57 (2 × CH<sub>3</sub>), 13.38, 13.19. **IR** (ATR): *v*<sub>max</sub> 2962 (m), 2930 (m), 2873 (w), 1687 (w), 1544 (w), 1491 (m), 1461 (m), 1091 (m), 1014 (m), 907 (m), 819 (m), 731 (s), 649 (m), 525 (m) cm<sup>-1</sup>. **HRMS** (APPI): *m/z* [M+H]<sup>+</sup> calcd for C<sub>24</sub>H<sub>28</sub>Cl: 351.1874, found: 351.1877

### 2-ethyl-3-((5-isopropyl-3,8-dimethylazulen-1-yl)(4-methoxyphenyl)methyl)chroman-4-one (5bb)

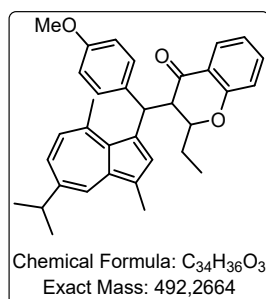

Copper(I) bromide dimethyl sulfide complex (4 mg, 0.02 mmol, 5 mol%) and ligand **L4** (14 mg, 0.024 mmol, 6 mol%) were added to a dry Schlenk-tube under Ar atmosphere. Next, dry DCM (2 mL) was added, and the mixture was stirred at room temperature for 15 min and then cooled to -78 °C. At this temperature, EtMgBr (3M in Et<sub>2</sub>O, 330 μL, 1.0 mmol, 2.5 eq) was added. After 30 min, a solution of chromone (59 mg, 0.4 mmol, 1.0 eq) in dry DCM (1.5 mL) was added and the reaction mixture was stirred overnight at -78°C. Next, in another dry Schlenk-tube under Ar atmosphere carbocation **2b** (420 mg, 1 mmol, 2.5 eq) was dissolved in dry DCM (2 mL) at room

temperature. Finally, the first reaction mixture (containing the metal enolate) was transferred to the second Schlenk-tube (containing the carbocation) and stirred at room temperature for 1 h. The reaction was quenched by the addition of saturated aqueous  $\text{NH}_4\text{Cl}$  (~ 10 mL). The phases were separated, and the aqueous phase was further extracted with DCM (3 × 50 mL). The combined organic phase was dried over anhydr.  $\text{MgSO}_4$ , and the solvent was evaporated under reduced pressure. Based on  $^1\text{H}$  NMR analysis of the crude reaction mixture, the diastereomeric ratio was 2:1. The crude product was purified by flash chromatography (silica gel, mixtures of hexane:DCM 3/1 to 1/1) to gain the final products as blue oils: 28 mg (14%).

#### Diastereomer 1:

Blue oil,  $R_f$  (silica, Hex:EtOAc 10/1): 0.32;  **$^1\text{H}$  NMR** (400 MHz,  $\text{CDCl}_3$ ):  $\delta$  8.02 – 7.96 (m, 2H), 7.50 – 7.40 (m, 2H), 7.34 – 7.29 (m, 2H), 7.10 (dd,  $J = 10.6, 2.2$  Hz, 1H), 7.03 (dd,  $J = 8.4, 1.1$  Hz, 1H), 6.89 – 6.80 (m, 3H), 6.57 (d,  $J = 10.7$  Hz, 1H), 5.50 (d,  $J = 11.5$  Hz, 1H), 4.30 (ddd,  $J = 9.8, 5.2, 1.5$  Hz, 1H), 3.75 (s, 3H), 3.31 (dd,  $J = 11.5, 1.6$  Hz, 1H), 2.94 (hept,  $J = 6.9$  Hz, 1H), 2.67 (s, 3H), 2.46 (s, 3H), 1.83 (tdd,  $J = 14.3, 7.3, 2.0$  Hz, 1H), 1.54 – 1.45 (m, 1H), 1.28 (s, 3H), 1.27 (s, 3H), 0.92 (t,  $J = 7.4$  Hz, 3H).  **$^{13}\text{C}$  NMR** (150 MHz,  $\text{CDCl}_3$ ):  $\delta$  194.17, 158.07, 157.89, 143.94, 139.45, 138.37, 138.21, 135.77, 135.21, 134.01, 133.43, 131.60, 129.75 (2 ×  $\text{C}_{\text{Ar}}$ ), 127.12, 126.87, 126.07, 124.81, 120.83, 120.69, 117.62, 114.17 (2 ×  $\text{C}_{\text{Ar}}$ ), 80.37, 56.63, 55.22, 43.30, 37.52, 27.59, 24.54 (2 ×  $\text{CH}_3$ ), 24.29, 13.37, 10.27. **IR** (ATR):  $\nu_{\text{max}}$  2961 (m), 2934 (m), 2877 (w), 2839 (w), 1688 (m), 1606 (m), 1510 (s), 1461 (s), 1250 (s), 1173 (m), 1030 (m), 729 (m), 523 (m)  $\text{cm}^{-1}$ . **HRMS** (HESI):  $m/z$   $[\text{M}+\text{H}]^+$  calcd for  $\text{C}_{34}\text{H}_{37}\text{O}_3$ : 493.2737, found: 493.2739;  $[\text{M}+\text{Na}]^+$  calcd for  $\text{C}_{34}\text{H}_{36}\text{O}_3\text{Na}$ : 515.2557, found: 515.2553;  $[\text{M}+\text{K}]^+$  calcd for  $\text{C}_{34}\text{H}_{36}\text{O}_3\text{K}$ : 531.2296, found: 531.2297; **HPLC**: Chiralpak IA, hexane/*i*-PrOH = 90:10, 1.0 mL/min, 254 nm,  $t_R$ (major) = 8.40 min,  $t_R$ (minor) = 4.29 min).

#### Diastereomer 2:

Blue oil,  $R_f$  (silica, Hex:EtOAc 10/1): 0.28;  **$^1\text{H}$  NMR** (400 MHz,  $\text{CDCl}_3$ ):  $\delta$  8.09 (d,  $J = 2.2$  Hz, 1H), 7.77 (s, 1H), 7.72 (dd,  $J = 7.8, 1.8$  Hz, 1H), 7.51 (ddd,  $J = 8.6, 7.1, 1.8$  Hz, 1H), 7.25 (dd,  $J = 10.7, 2.2$  Hz, 1H), 7.01 (td,  $J = 7.3, 1.1$  Hz, 1H), 6.98 – 6.93 (m, 3H), 6.81 (d,  $J = 10.7$  Hz, 1H), 6.72 – 6.64 (m, 2H), 5.47 (d,  $J = 11.6$  Hz, 1H), 4.27 (ddd,  $J = 9.6, 5.7, 1.2$  Hz, 1H), 3.69 (s, 3H), 3.34 (dd,  $J = 11.6, 1.3$  Hz, 1H), 3.01 (p,  $J = 6.9$  Hz, 1H), 2.92 (s, 3H), 2.68 (s, 3H), 1.77 (ddq,  $J = 14.6, 9.5, 7.3$  Hz, 1H), 1.49 (dq,  $J = 14.5, 7.4, 5.6$  Hz, 1H), 1.33 (s, 3H), 1.32 (s, 3H), 0.85 (t,  $J = 7.3$  Hz, 3H).  **$^{13}\text{C}$  NMR** (100 MHz,  $\text{CDCl}_3$ ):  $\delta$  194.25, 158.18, 157.76, 145.40, 139.82, 138.24, 136.16, 136.00, 134.80, 134.68, 133.76, 132.91, 129.60 (2 ×  $\text{C}_{\text{Ar}}$ ), 127.37, 127.04, 126.92, 125.31, 120.95, 120.82, 117.83, 113.71 (2 ×  $\text{C}_{\text{Ar}}$ ), 81.08, 57.70, 55.03, 43.97, 37.58, 27.95, 24.58, 24.54, 24.30, 13.37, 10.11. **IR** (ATR):  $\nu_{\text{max}}$  2962 (m), 2933 (m), 2875 (w), 2839 (w), 1688 (m), 1606 (m), 1511 (s), 1462 (s), 1251 (s), 1178 (m), 1030 (m), 908 (m), 729 (s), 527 (m)  $\text{cm}^{-1}$ . **HRMS** (HESI):  $m/z$   $[\text{M}+\text{H}]^+$  calcd for  $\text{C}_{34}\text{H}_{37}\text{O}_3$ : 493.2737, found: 493.2735;  $[\text{M}+\text{Na}]^+$  calcd for  $\text{C}_{34}\text{H}_{36}\text{O}_3\text{Na}$ : 515.2557, found: 515.2556;  $[\text{M}+\text{K}]^+$  calcd for  $\text{C}_{34}\text{H}_{36}\text{O}_3\text{K}$ : 531.2296, found: 531.2296; **HPLC**: Chiralpak IA, hexane/*i*-PrOH = 90:10, 1.0 mL/min, 254 nm,  $t_R$ (major) = 12.14 min,  $t_R$ (minor) = 4.63 min).

### ***N*-(3-ethyl-2-((5-isopropyl-3,8-dimethylazulen-1-yl))(4-methoxyphenyl)methyl)cyclohexylidene)-4-methylbenzenesulfonamide (5cb)**

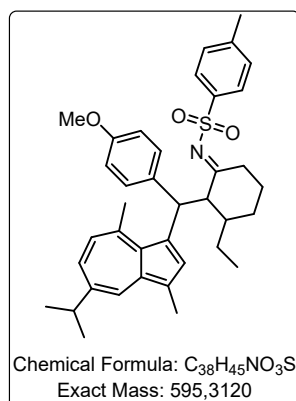

Cu(OTf)<sub>2</sub> (9 mg, 0.025 mmol, 5 mol%) and ligand **L2** (27 mg, 0.05 mmol, 10 mol%) were added to a dry Schlenk-tube under Ar atmosphere. Next, dry toluene (1 mL) was added, and the mixture was stirred at room temperature for 15 min. Next, the *N*-sulfonyl imine in dry toluene (3 mL) was added and stirred for 30 min. Next, the reaction mixture was cooled to -30 °C and at this temperature Et<sub>2</sub>Zn (0.9M in hexane, 720 μL, 0.65 mmol, 1.3 eq) was added and stirred for 2 h. Next, in another dry Schlenk-tube under Ar atmosphere carbocation **2b** (420 mg, 1 mmol, 2.5 eq) was dissolved in dry DCM (4 mL) at room temperature. Finally, the first reaction mixture (containing the metal enolate) was transferred to the second Schlenk-tube (containing the carbocation) and stirred at room temperature for 1.5 h. The reaction was quenched by the addition of saturated aqueous NH<sub>4</sub>Cl (~ 10 mL). The phases were separated, and the aqueous phase was further extracted with DCM (3 × 50 mL). The combined organic phase was dried over anhydr. MgSO<sub>4</sub> and the solvent was evaporated under reduced pressure. Based on <sup>1</sup>H NMR analysis of the crude reaction mixture, the diastereomeric ratio was 2:1. The crude product was purified by flash chromatography (preparative TLC, hexane:EtOAc 5/1) to gain the final products as blue oils: 37 mg (12%).

#### Diastereomer 1:

**R<sub>f</sub>** (silica, Hex:EtOAc 5/1): 0.26; **<sup>1</sup>H NMR** (400 MHz, CDCl<sub>3</sub>): δ 8.03 (d, *J* = 2.1 Hz, 1H), 7.92 (s, 1H), 7.46 (d, *J* = 8.0 Hz, 2H), 7.24 – 7.17 (m, 3H), 7.12 (d, *J* = 7.9 Hz, 2H), 6.81 – 6.73 (m, 3H), 5.44 (d, *J* = 11.4 Hz, 1H), 3.72 (s, 3H), 3.20 (t, *J* = 12.2 Hz, 2H), 3.06 (s, 3H), 3.03 – 2.96 (m, 1H), 2.55 (s, 3H), 2.38 (s, 3H), 2.26 – 2.11 (m, 2H), 2.00 – 1.80 (m, 4H), 1.62 (d, *J* = 14.8 Hz, 2H), 1.34 (s, 3H), 1.32 (s, 3H), 0.74 (t, *J* = 7.3 Hz, 3H). **<sup>13</sup>C NMR** (100 MHz, CDCl<sub>3</sub>): δ 196.11, 157.81, 143.64, 142.97, 139.79, 139.61, 138.75, 137.87, 136.15, 134.29, 133.45, 132.47, 129.64 (2 × C<sub>Ar</sub>), 129.23 (2 × C<sub>Ar</sub>), 127.02, 126.70 (2 × C<sub>Ar</sub>), 126.24, 124.62, 113.99 (2 × C<sub>Ar</sub>), 60.70, 55.19, 45.27, 41.91, 37.60, 32.95, 29.71, 28.37, 24.66, 24.63, 24.53, 24.13, 23.44, 21.53, 13.15, 11.82. **IR** (ATR): ν<sub>max</sub> 2961 (m), 2928 (m), 2871 (m), 1608 (s), 1511 (s), 1460 (m), 1317 (m), 1304 (m), 1252 (s), 1153 (s), 1092 (s), 1033 (m), 811 (s), 726 (s), 676 (s), 544 (m) cm<sup>-1</sup>. **HRMS** (HESI): *m/z* [M+H]<sup>+</sup> calcd for C<sub>38</sub>H<sub>46</sub>NO<sub>3</sub>S: 596.3193, found: 596.3187; [M+Na]<sup>+</sup> calcd for C<sub>38</sub>H<sub>45</sub>NO<sub>3</sub>SNa: 618.3012, found: 618.3005; [M+K]<sup>+</sup> calcd for C<sub>38</sub>H<sub>45</sub>NO<sub>3</sub>SK: 634.2752, found: 634.2745; **HRMS** (APPI): *m/z* [M+H]<sup>+</sup> calcd for C<sub>38</sub>H<sub>46</sub>NO<sub>3</sub>S: 596.3193, found: 596.3194; **HPLC**: Chiralpak IC, hexane/*i*-PrOH = 90:10, 1.5 mL/min, 254 nm, t<sub>R</sub>(major) = 23.61 min, t<sub>R</sub>(minor) = 28.75 min.

#### Diastereomer 2:

**R<sub>f</sub>** (silica, Hex:EtOAc 5/1): 0.20; **<sup>1</sup>H NMR** (400 MHz, CDCl<sub>3</sub>): δ 8.06 (d, *J* = 2.2 Hz, 1H), 7.74 (s, 1H), 7.40 (d, *J* = 8.0 Hz, 2H), 7.24 (dd, *J* = 10.7, 2.0 Hz, 1H), 7.19 (d, *J* = 8.0 Hz, 2H), 7.10 (d, *J* = 8.7 Hz, 2H), 6.82 (d, *J* = 10.7 Hz, 1H), 6.74 – 6.67 (m, 2H), 5.47 (d, *J* = 11.7 Hz, 1H), 3.73 (s, 3H), 3.65 (d, *J* = 14.4 Hz, 1H), 3.20 (d, *J* = 11.6 Hz, 1H), 3.12 (s, 3H), 3.00 (p, *J* = 6.8 Hz, 1H), 2.72 – 2.66 (m, 1H), 2.64 (s, 3H), 2.40 (s, 3H), 2.01 – 1.95 (m, 1H), 1.93 – 1.82 (m, 3H), 1.47 – 1.34 (m, 3H), 1.32 (s, 3H), 1.31 (s, 3H), 0.81 (t, *J* = 7.3 Hz, 3H). **<sup>13</sup>C NMR** (100 MHz, CDCl<sub>3</sub>): δ 194.64, 157.83, 144.57, 143.14, 139.90, 138.62, 138.20, 136.71, 135.55, 134.77, 133.76, 132.96, 129.37 (2 × C<sub>Ar</sub>), 129.19 (2 × C<sub>Ar</sub>), 127.49, 127.14, 127.03 (2 × C<sub>Ar</sub>), 125.42, 114.14 (2 × C<sub>Ar</sub>), 60.57, 55.27, 46.31, 40.66, 37.69, 33.67, 28.59, 25.28, 24.70, 24.65, 23.57, 22.86, 21.69, 13.42, 11.84. **IR** (ATR): ν<sub>max</sub> 3961 (m), 2930 (m), 2868 (w), 1608 (s), 1511 (s), 1461 (m), 1303 (m), 1253 (s), 1152 (s), 1092 (s), 1034 (m), 908 (m), 826 (m), 813 (m), 727 (s), 667 (s), 588 (s), 539 (s) cm<sup>-1</sup>. **HRMS** (HESI): *m/z* [M+H]<sup>+</sup> calcd for C<sub>38</sub>H<sub>46</sub>NO<sub>3</sub>S: 596.3193, found: 596.3184; [M+Na]<sup>+</sup> calcd for C<sub>38</sub>H<sub>45</sub>NO<sub>3</sub>SNa: 618.3012, found: 618.3003; [M+K]<sup>+</sup> calcd for C<sub>38</sub>H<sub>45</sub>NO<sub>3</sub>SK: 634.2752, found: 634.2743; **HRMS** (APPI): *m/z* [M+H]<sup>+</sup> calcd for C<sub>38</sub>H<sub>46</sub>NO<sub>3</sub>S: 596.3193, found: 596.3189; **HPLC**: Chiralpak IC, hexane/*i*-PrOH = 90:10, 1.5 mL/min, 254 nm, t<sub>R</sub>(major) = 20.11 min, t<sub>R</sub>(minor) = 18.67 min.

## 6.3. Products of silyl enol ether trapping

### 2-((5-Isopropyl-3,8-dimethylazulen-1-yl)(*p*-tolyl)methyl)cyclohexan-1-one (7a)

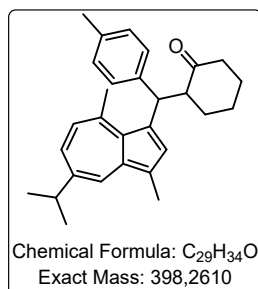

Following the *General procedure 3* using 1-(trimethylsiloxy)cyclohexene (101  $\mu$ L, 0.26 mmol, 2.0 eq). Based on <sup>1</sup>H NMR analysis of the crude reaction mixture, the diastereomeric ratio was 1:1. The crude product was purified by flash chromatography (silica gel, Hex:EtOAc 40:1 to 10:1). Isolated: 67 mg (65%)

#### Diastereomer 1:

Blue oil, *R<sub>f</sub>* (silica, Hex:EtOAc 10/1): 0.45; <sup>1</sup>H NMR (600 MHz, CDCl<sub>3</sub>):  $\delta$  8.01 (d, *J* = 2.1 Hz, 1H), 7.74 (s, 1H), 7.17 (dd, *J* = 10.7, 2.2 Hz, 1H), 7.05 (d, *J* = 7.9 Hz, 2H), 7.00 (d, *J* = 7.9 Hz, 2H), 6.76 (d, *J* = 10.8 Hz, 1H), 5.46 (d, *J* = 9.2 Hz, 1H), 3.38 (td, *J* = 9.7, 4.4 Hz, 1H), 3.07 (s, 3H), 2.96 (p, *J* = 6.9 Hz, 1H), 2.63 (s, 3H), 2.39 – 2.26 (m, 2H), 2.24 (s, 3H), 2.00 (dt, *J* = 12.2, 6.6 Hz, 1H), 1.93 – 1.83 (m, 2H), 1.82 – 1.72 (m, 1H), 1.72 – 1.64 (m, 1H), 1.49 – 1.39 (m, 1H), 1.29 (d, *J* = 2.1 Hz, 3H), 1.28 (d, *J* = 2.1 Hz, 3H). <sup>13</sup>C NMR (150 MHz, CDCl<sub>3</sub>):  $\delta$  213.06, 145.47, 141.22, 138.82, 137.37, 136.89, 135.08, 134.62, 133.47, 132.49, 129.53, 129.15 (2  $\times$  C<sub>Ar</sub>), 128.94 (2  $\times$  C<sub>Ar</sub>), 126.88, 124.15, 58.31, 43.44, 42.52, 37.52, 33.77, 29.21, 28.07, 24.71, 24.57, 24.55, 20.91, 13.30. IR (ATR):  $\nu_{\text{max}}$  2957 (m), 2929 (m), 2863 (m), 1706 (m), 1512 (m), 1448 (m), 1125 (m), 909 (m), 820 (m), 728 (s), 647 (m), 504 (m) cm<sup>-1</sup>. HRMS (HESI): *m/z* [M+H]<sup>+</sup> calcd for C<sub>29</sub>H<sub>35</sub>O: 399.2682, found: 399.2687; [M+Na]<sup>+</sup> calcd for C<sub>29</sub>H<sub>34</sub>ONa: 421.2502, found: 421.2509

#### Diastereomer 2:

Blue oil, *R<sub>f</sub>* (silica, Hex:EtOAc 10/1): 0.38; <sup>1</sup>H NMR (600 MHz, CDCl<sub>3</sub>):  $\delta$  8.01 (d, *J* = 2.2 Hz, 1H), 7.53 (s, 1H), 7.22 (dd, *J* = 10.6, 2.2 Hz, 1H), 7.17 (d, *J* = 7.9 Hz, 2H), 7.00 (d, *J* = 7.9 Hz, 2H), 6.81 (d, *J* = 10.5 Hz, 1H), 5.47 (d, *J* = 10.9 Hz, 1H), 3.44 – 3.37 (m, 1H), 3.12 (s, 3H), 2.98 (hept, *J* = 6.9 Hz, 1H), 2.58 (s, 3H), 2.50 – 2.39 (m, 2H), 2.22 (s, 3H), 2.05 – 1.97 (m, 1H), 1.79 – 1.69 (m, 3H), 1.62 – 1.56 (m, 1H), 1.45 – 1.39 (m, 1H), 1.32 (d, *J* = 1.9 Hz, 3H), 1.31 (d, *J* = 1.9 Hz, 3H). <sup>13</sup>C NMR (150 MHz, CDCl<sub>3</sub>):  $\delta$  213.14, 144.44, 142.48, 139.53, 138.53, 137.54 (2  $\times$  C<sub>Ar</sub>), 134.83, 134.12, 133.35, 131.79, 128.98 (2  $\times$  C<sub>Ar</sub>), 127.92 (2  $\times$  C<sub>Ar</sub>), 126.72, 125.43, 57.61, 42.95, 42.84, 37.56, 34.20, 29.44, 28.97, 24.88, 24.55, 24.52, 20.93, 13.26. IR (ATR):  $\nu_{\text{max}}$  2958 (m), 2930 (m), 2863 (m), 1709 (m), 1513 (m), 1447 (m), 1124 (m), 909 (m), 815 (m), 728 (s), 647 (m), 546 (m), 521 (m) cm<sup>-1</sup>. HRMS (HESI): *m/z* [M+H]<sup>+</sup> calcd for C<sub>29</sub>H<sub>35</sub>O: 399.2682, found: 399.2686; [M+Na]<sup>+</sup> calcd for C<sub>29</sub>H<sub>34</sub>ONa: 421.2502, found: 421.2504



### 5-((5-Isopropyl-3,8-dimethylazulen-1-yl)(*p*-tolyl)methyl)furan-2(5H)-one (7b)

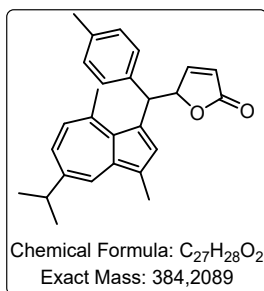

Following the *General procedure 3* using 2-(trimethylsiloxy)furan (107  $\mu$ L, 0.26 mmol, 2.0 eq). Based on <sup>1</sup>H NMR analysis of the crude reaction mixture, the diastereomeric ratio was 2:3. The crude product was purified by flash chromatography (silica gel, Hex:EtOAc 20:1 to 2:1). Isolated: 60 mg (60%). The diastereomers were not separated (ratio of 2:3).

Blue oil, *R<sub>f</sub>* (silica, Hex:EtOAc 10/1): 0.12; <sup>1</sup>H NMR (600 MHz, CDCl<sub>3</sub>):  $\delta$  8.13 (d, *J* = 2.1 Hz, 0.6H), 8.10 (d, *J* = 2.1 Hz, 0.4H), 7.84 (s, 0.4H), 7.79 (s, 0.6H), 7.42 (dd, *J* = 5.8, 1.4 Hz, 0.4H), 7.28 (dd, *J* = 10.7, 2.2 Hz, 0.6H), 7.27 – 7.19 (m, 1H, overlaying), 7.15 (s, 0.4H), 7.14 (s, 0.6H), 7.09 – 7.03 (m, 3H, overlaying), 6.84 (d, *J* = 10.7 Hz, 0.6H), 6.79 (d, *J* = 10.8 Hz, 0.4H), 6.02 (m, 1H, overlaying), 5.75 (dd, *J* = 7.8, 1.7 Hz, 0.4H), 5.70 (dd, *J* = 8.2, 1.7 Hz, 0.6H), 5.17 (d, *J* = 7.9 Hz, 0.4H), 5.05 (d, *J* = 8.2 Hz, 0.6H), 3.01 (dp, *J* = 14.0, 6.9 Hz, 1H, overlaying), 2.85 (s, 1.8H), 2.84 (s, 1.2H), 2.67 (s, 1.2H), 2.66 (s, 1.8H), 2.27 (s, 1.2H), 2.27 (s, 1.8H), 1.34 (d, *J* = 6.8 Hz, 3.6H), 1.32 (dd, *J* = 6.9, 2.2 Hz, 2.4H). <sup>13</sup>C NMR (150 MHz, CDCl<sub>3</sub>):  $\delta$  172.98, 172.91, 156.88, 156.02, 145.04, 144.91, 140.15, 139.76, 138.28, 138.24, 137.67, 137.47, 137.12, 136.53, 136.19, 135.13, 134.96, 134.00, 133.77, 133.11, 132.42, 129.44, 129.01, 128.79, 127.56, 127.37, 125.14, 124.78, 124.57, 124.51, 121.90, 86.93, 86.66, 49.54, 49.37, 37.63, 37.58, 28.05, 27.89, 24.58, 24.55, 20.99, 13.24, 13.17. IR (ATR):  $\nu_{\max}$  2956 (m), 2922 (w), 2863 (w), 1753 (s, C=O), 1511 (m), 1156 (m), 1097 (m), 900 (m), 811 (s), 727 (m) cm<sup>-1</sup>. HRMS (HESI): *m/z* [M+H]<sup>+</sup> calcd for C<sub>27</sub>H<sub>28</sub>O<sub>2</sub>: 385.2162, found: 385.2169; [M+Na]<sup>+</sup> calcd for C<sub>27</sub>H<sub>28</sub>O<sub>2</sub>Na: 407.1982, found: 407.1987

### Methyl 3-(5-isopropyl-3,8-dimethylazulen-1-yl)-3-(*p*-tolyl)propanoate (7c)

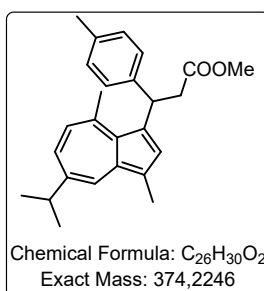

Following the *General procedure 3* using 1-(*tert*-butyldimethylsilyloxy)-1-methoxyethene (114  $\mu$ L, 0.26 mmol, 2.0 eq). The crude product was purified by flash chromatography (silica gel, Hex:EtOAc 20:1 to 10:1). Isolated: 73 mg (75%).

Blue oil, *R<sub>f</sub>* (silica, Hex:EtOAc 10/1): 0.46; <sup>1</sup>H NMR (600 MHz, CDCl<sub>3</sub>):  $\delta$  8.07 (d, *J* = 2.2 Hz, 1H), 7.61 (s, 1H), 7.23 (dd, *J* = 10.8, 2.2 Hz, 1H), 7.05 – 6.99 (m, 4H), 6.80 (d, *J* = 10.7 Hz, 1H), 5.59 (t, *J* = 7.8 Hz, 1H), 3.56 (s, 3H), 3.19 – 3.07 (m, 2H), 3.04 – 2.98 (m, 1H), 2.97 (s, 3H), 2.62 (s, 3H), 2.26 (s, 3H), 1.33 (d, *J* = 1.3 Hz, 3H), 1.31 (d, *J* = 1.3 Hz, 3H). <sup>13</sup>C NMR (150 MHz, CDCl<sub>3</sub>):  $\delta$  172.72, 145.35, 142.88, 139.20, 137.65, 137.16, 135.39, 134.75, 133.57, 132.36, 129.14 (2  $\times$  C<sub>Ar</sub>), 128.48, 127.82 (2  $\times$  C<sub>Ar</sub>), 127.03, 124.45, 51.61, 43.58, 41.10, 37.59, 27.65, 24.59 (2  $\times$  CH<sub>3</sub>), 20.95, 13.19. IR (ATR):  $\nu_{\max}$  2959 (m), 2928 (m), 2871 (w), 1736 (s), 1688 (m), 1513 (m), 1437 (m), 1253 (m), 1157 (s), 1021 (m), 910 (m), 817 (m), 730 (s), 650 (m), 528 (m) cm<sup>-1</sup>. HRMS (HESI): *m/z* [M+H]<sup>+</sup> calcd for C<sub>26</sub>H<sub>30</sub>O<sub>2</sub>: 375.2319, found: 375.2326; [M+Na]<sup>+</sup> calcd for C<sub>26</sub>H<sub>30</sub>O<sub>2</sub>Na: 397.2138, found: 397.2144



### 3-(5-Isopropyl-3,8-dimethylazulen-1-yl)-1-phenyl-3-(*p*-tolyl)propan-1-one (7d)

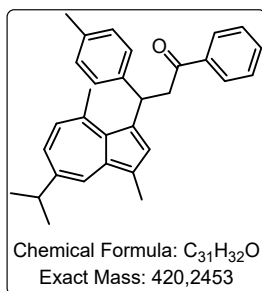

Following the *General procedure 3* using 1-phenyl-1-trimethylsiloxyethylene (107  $\mu$ L, 0.26 mmol, 2.0 eq). The crude product was purified by flash chromatography (silica gel, Hex:EtOAc 40:1 to 10:1). Isolated: 70 mg (64%).

Blue solid,  $R_f$  (silica, Hex:EtOAc 10/1): 0.49; **Mp**: 126–129 °C; **<sup>1</sup>H NMR** (600 MHz, CDCl<sub>3</sub>):  $\delta$  8.06 (d,  $J$  = 2.2 Hz, 1H), 7.95 – 7.91 (m, 2H), 7.61 (s, 1H), 7.55 – 7.51 (m, 1H), 7.45 – 7.39 (m, 2H), 7.23 (dd,  $J$  = 10.7, 2.2 Hz, 1H), 7.06 (d,  $J$  = 8.2 Hz, 2H), 7.03 (d,  $J$  = 8.1 Hz, 2H), 6.81 (d,  $J$  = 10.8 Hz, 1H), 5.88 (t,  $J$  = 7.1 Hz, 1H), 3.87 (dd,  $J$  = 17.0, 7.0 Hz, 1H), 3.78 (dd,  $J$  = 17.0, 7.1 Hz, 1H), 3.04 – 2.96 (m, 4H, overlaying), 2.60 (s, 3H), 2.27 (s, 3H), 1.33 (d,  $J$  = 1.8 Hz, 3H), 1.32 (d,  $J$  = 1.8 Hz, 3H). **<sup>13</sup>C NMR** (150 MHz, CDCl<sub>3</sub>):  $\delta$  198.58, 145.57, 143.46, 139.13, 137.66, 137.29, 137.25, 135.22, 134.78, 133.61, 132.91, 132.26, 129.32, 129.14 (2  $\times$  C<sub>Ar</sub>), 128.55 (2  $\times$  C<sub>Ar</sub>), 128.10 (2  $\times$  C<sub>Ar</sub>), 128.03 (2  $\times$  C<sub>Ar</sub>), 126.99, 124.40, 47.88, 39.88, 37.60, 27.75, 24.60 (2  $\times$  CH<sub>3</sub>), 20.96, 13.20. **IR** (ATR):  $\nu_{\max}$  2957 (m), 2925 (w), 2866 (w), 1679 (s, C=O), 1657 (m), 1596 (m), 1510 (m), 1448 (m), 1355 (m), 1272 (m), 1023 (m), 1003 (m), 973 (m), 913 (m), 870 (m), 817 (s), 761 (s), 751 (m), 687 (s), 655 (m), 557 (s) cm<sup>-1</sup>. **HRMS** (HESI):  $m/z$  [M+H]<sup>+</sup> calcd for C<sub>31</sub>H<sub>33</sub>O: 421.2526, found: 421.2527; [M+Na]<sup>+</sup> calcd for C<sub>31</sub>H<sub>32</sub>ONa: 443.2345, found: 443.2351

### (*E*)-5-(5-Isopropyl-3,8-dimethylazulen-1-yl)-1-methoxy-5-(*p*-tolyl)pent-1-en-3-one (7e)

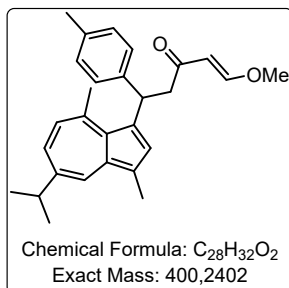

Following the *General procedure 3* using *trans*-1-methoxy-3-trimethylsiloxy-1,3-butadiene (101  $\mu$ L, 0.26 mmol, 2.0 eq). The crude product was purified by flash chromatography (silica gel, Hex:EtOAc 20:1 to 2:1). Isolated: 13 mg (12%).

Blue oil,  $R_f$  (silica, Hex:EtOAc 10/1): 0.19; **<sup>1</sup>H NMR** (600 MHz, CDCl<sub>3</sub>):  $\delta$  8.05 (d,  $J$  = 2.3 Hz, 1H), 7.58 (s, 1H), 7.50 (d,  $J$  = 12.6 Hz, 1H), 7.22 (dd,  $J$  = 10.7, 2.2 Hz, 1H), 7.02 (s, 4H), 6.79 (d,  $J$  = 10.8 Hz, 1H), 5.69 (t,  $J$  = 7.3 Hz, 1H), 5.52 (d,  $J$  = 12.6 Hz, 1H), 3.61 (s, 3H), 3.30 (dd,  $J$  = 15.9, 7.2 Hz, 1H), 3.24 (dd,  $J$  = 15.9, 7.3 Hz, 1H), 3.02 – 2.96 (m, 1H), 2.98 (s, 3H), 2.61 (s, 3H), 2.26 (s, 3H), 1.32 (d,  $J$  = 1.7 Hz, 3H), 1.31 (d,  $J$  = 1.7 Hz, 3H). **<sup>13</sup>C NMR** (150 MHz, CDCl<sub>3</sub>):  $\delta$  197.91, 162.63, 145.52, 143.48, 139.08, 137.64, 137.38, 135.11, 134.69, 133.52, 132.23, 129.34, 129.04 (2  $\times$  C<sub>Ar</sub>), 127.98 (2  $\times$  C<sub>Ar</sub>), 126.92, 124.34, 105.85, 57.42, 50.50, 40.13, 37.58, 27.75, 24.58 (2  $\times$  CH<sub>3</sub>), 20.94, 13.20. **IR** (ATR):  $\nu_{\max}$  2961 (m), 2927 (m), 2869 (w), 1680 (m), 1620 (m), 1591 (s), 1511 (m), 1439 (m), 1309 (m), 1185 (m), 1083 (m), 920 (m), 811 (m), 729 (m) cm<sup>-1</sup>. **HRMS** (HESI):  $m/z$  [M+H]<sup>+</sup> calcd for C<sub>28</sub>H<sub>33</sub>O<sub>2</sub>: 401.2475, found: 401.2476; [M+Na]<sup>+</sup> calcd for C<sub>28</sub>H<sub>32</sub>O<sub>2</sub>Na: 423.2295, found: 423.2296

#### 4-(5-Isopropyl-3,8-dimethylazulen-1-yl)-4-(p-tolyl)butan-2-one (7f)

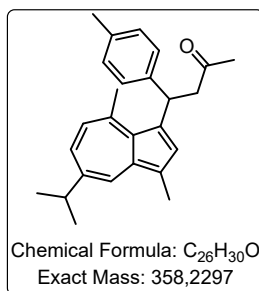

Following the *General procedure 3* using (isopropenyloxy)trimethylsilane (87  $\mu$ L, 0.26 mmol, 2.0 eq). The crude product was purified by flash chromatography (silica gel, Hex:EtOAc 20:1 to 10:1). Isolated: 42 mg (45%).

Blue oil,  $R_f$  (silica, Hex:EtOAc 10/1): 0.38; **<sup>1</sup>H NMR** (600 MHz, CDCl<sub>3</sub>):  $\delta$  8.06 (d,  $J$  = 2.2 Hz, 1H), 7.59 (s, 1H), 7.22 (dd,  $J$  = 10.7, 2.2 Hz, 1H), 7.04 – 6.97 (m, 4H), 6.79 (d,  $J$  = 10.8 Hz, 1H), 5.62 (t,  $J$  = 7.4 Hz, 1H), 3.28 (dd,  $J$  = 16.3, 7.7 Hz, 1H), 3.20 (dd,  $J$  = 16.3, 7.2 Hz, 1H), 3.03 – 2.97 (m, 1H), 2.97 (s, 3H), 2.62 (s, 3H), 2.26 (s, 3H), 2.04 (s, 3H), 1.32 (d,  $J$  = 1.5 Hz, 3H), 1.31 (d,  $J$  = 1.5 Hz, 3H). **<sup>13</sup>C NMR** (150 MHz, CDCl<sub>3</sub>):  $\delta$  207.64, 145.45, 143.26, 139.25, 137.66, 137.23, 135.28, 134.81, 133.63, 132.37, 129.15 (2  $\times$  C<sub>Ar</sub>), 128.75, 127.90 (2  $\times$  C<sub>Ar</sub>), 127.04, 124.46, 52.93, 40.20, 37.60, 30.66, 27.72, 24.58 (2  $\times$  CH<sub>3</sub>), 20.94, 13.19. **IR** (ATR):  $\nu_{\text{max}}$  2963 (m), 2926 (m), 2872 (w), 1710 (m), 1688 (m), 1513 (m), 1358 (m), 1159 (m), 1020 (m), 910 (m), 818 (m), 729 (s), 647 (m), 544 (m) cm<sup>-1</sup>. **HRMS** (HESI):  $m/z$  [M+H]<sup>+</sup> calcd for C<sub>26</sub>H<sub>31</sub>O: 359.2369, found: 359.2373; [M+Na]<sup>+</sup> calcd for C<sub>26</sub>H<sub>30</sub>ONa: 381.2189, found: 381.2195

## 7. NMR spectra

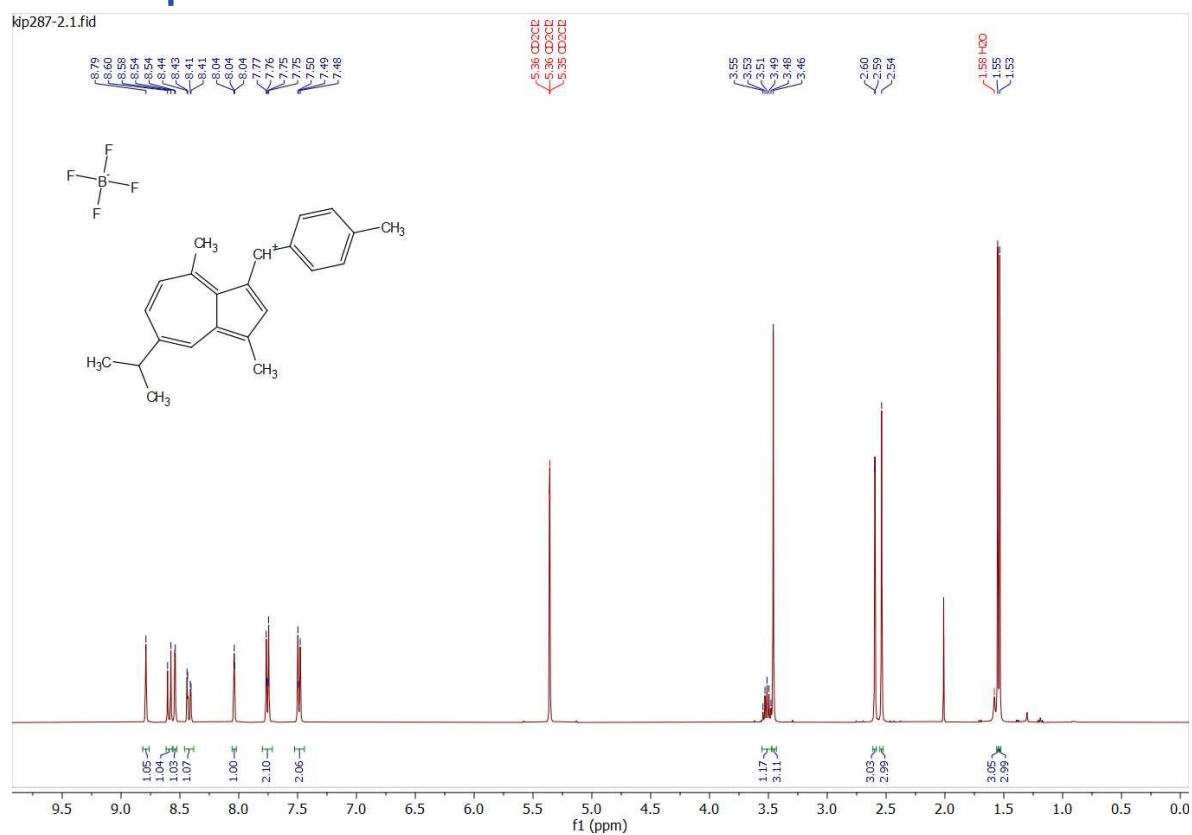

Figure S5.  $^1\text{H}$  NMR spectrum of compound **2a** (400 MHz,  $\text{CD}_2\text{Cl}_2$ ).

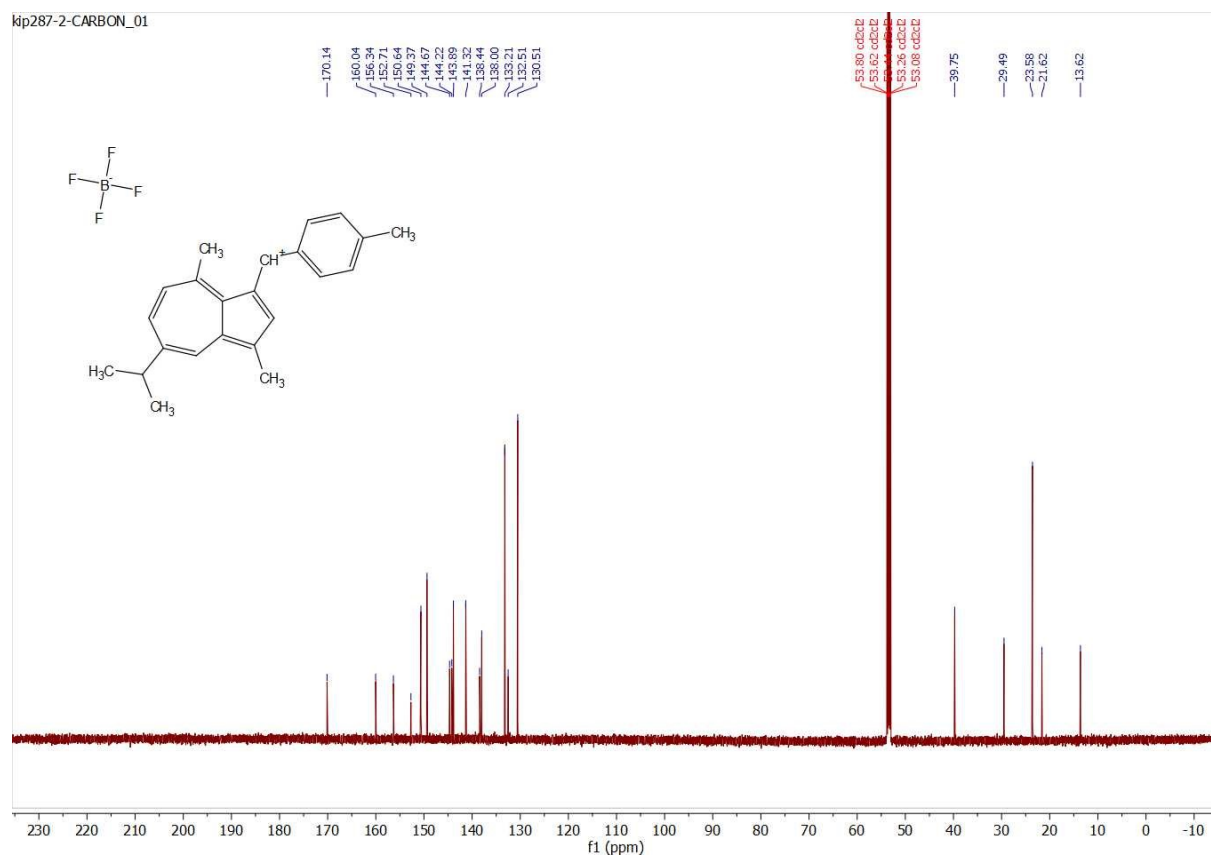

Figure S6.  $^{13}\text{C}$  NMR spectrum of compound **2a** (150 MHz,  $\text{CD}_2\text{Cl}_2$ ).

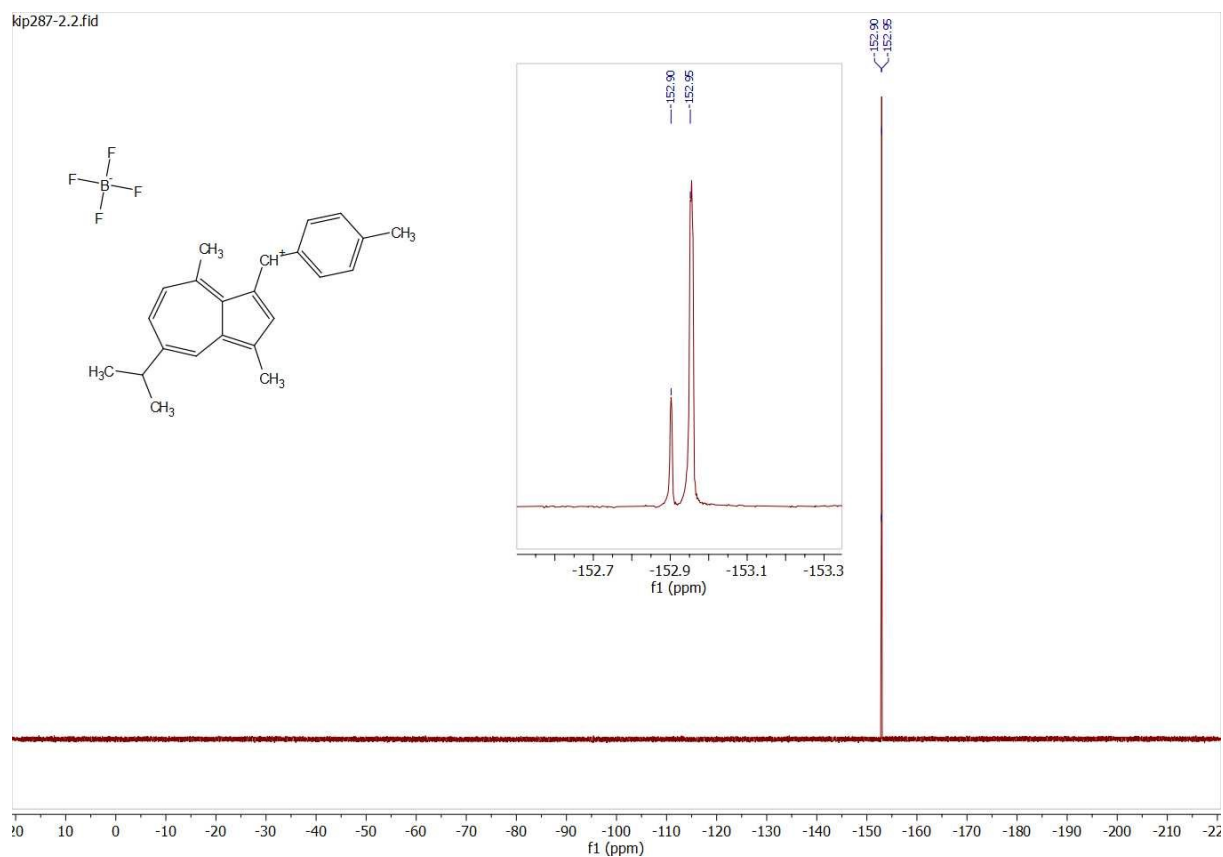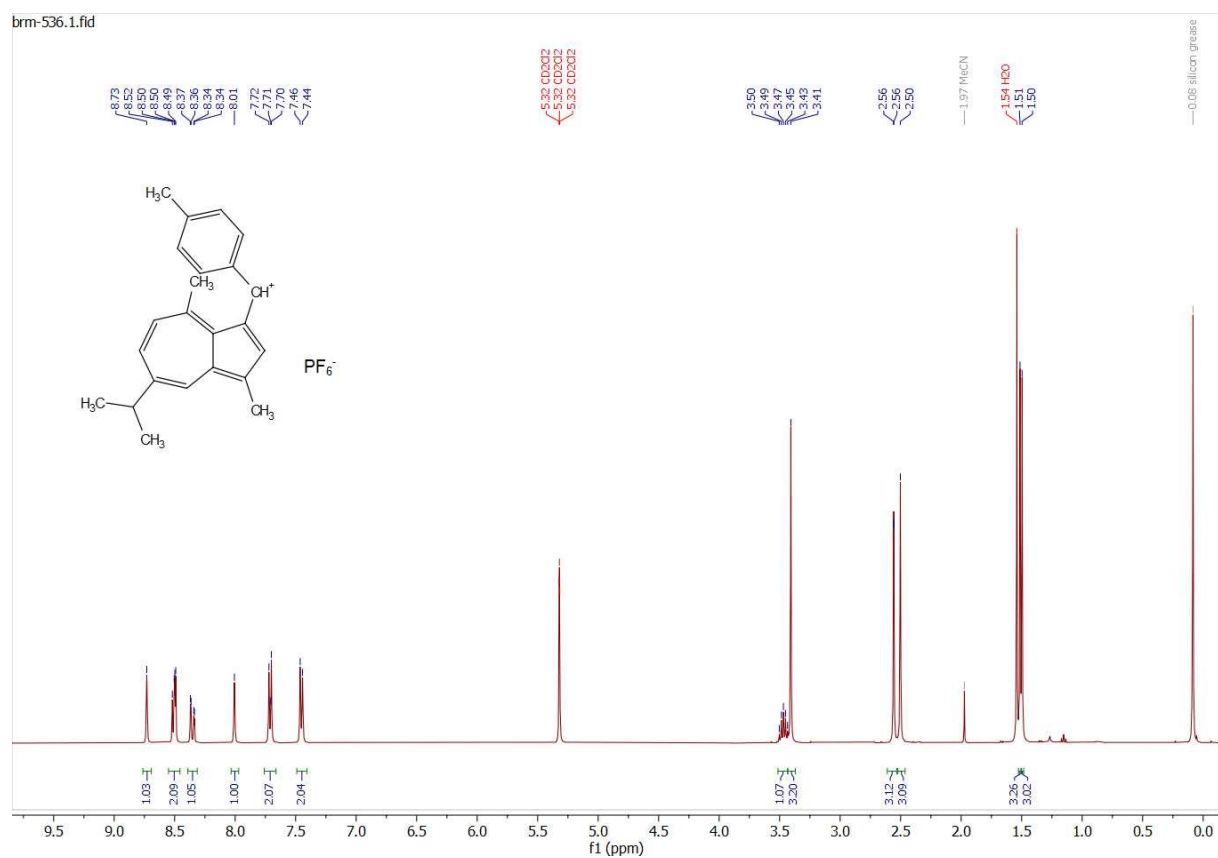

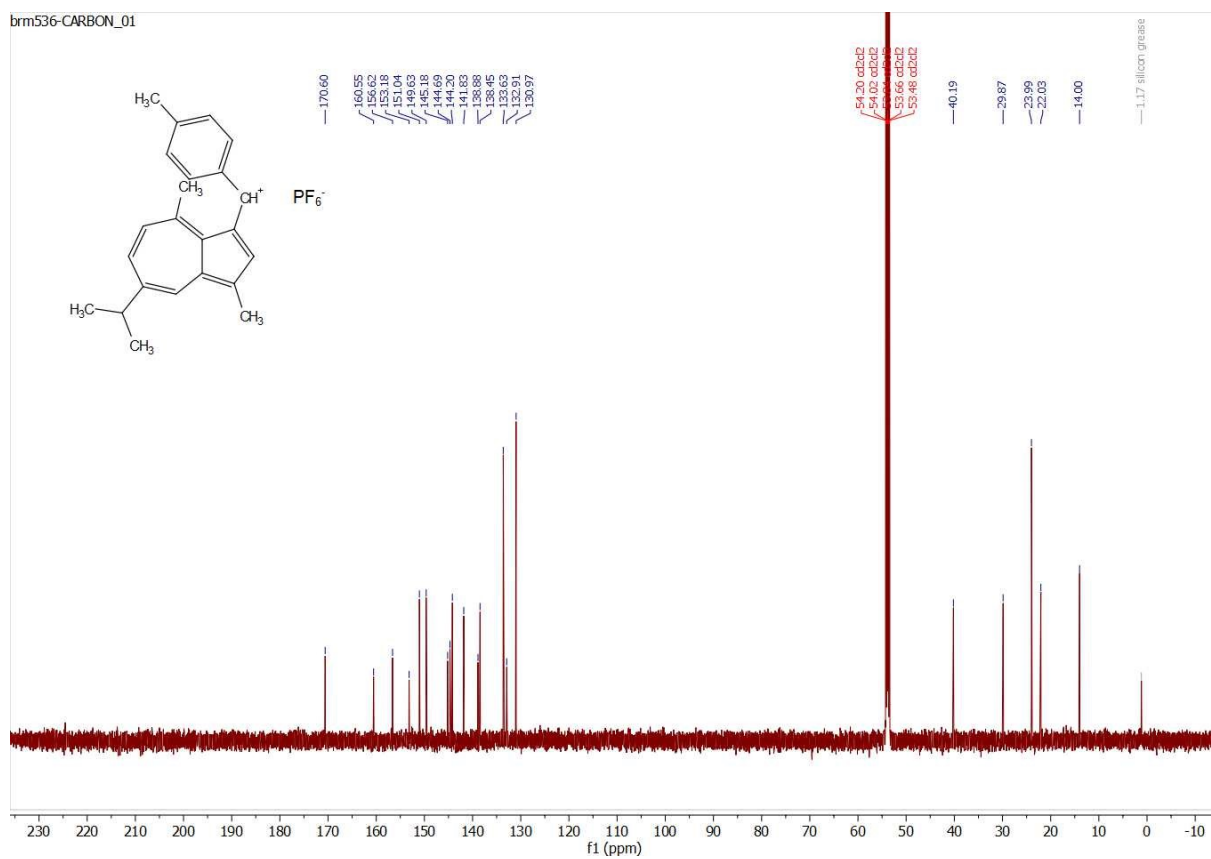

Figure S9.  $^{13}\text{C}$  NMR spectrum of compound **2a'** (150 MHz,  $\text{CD}_2\text{Cl}_2$ ).

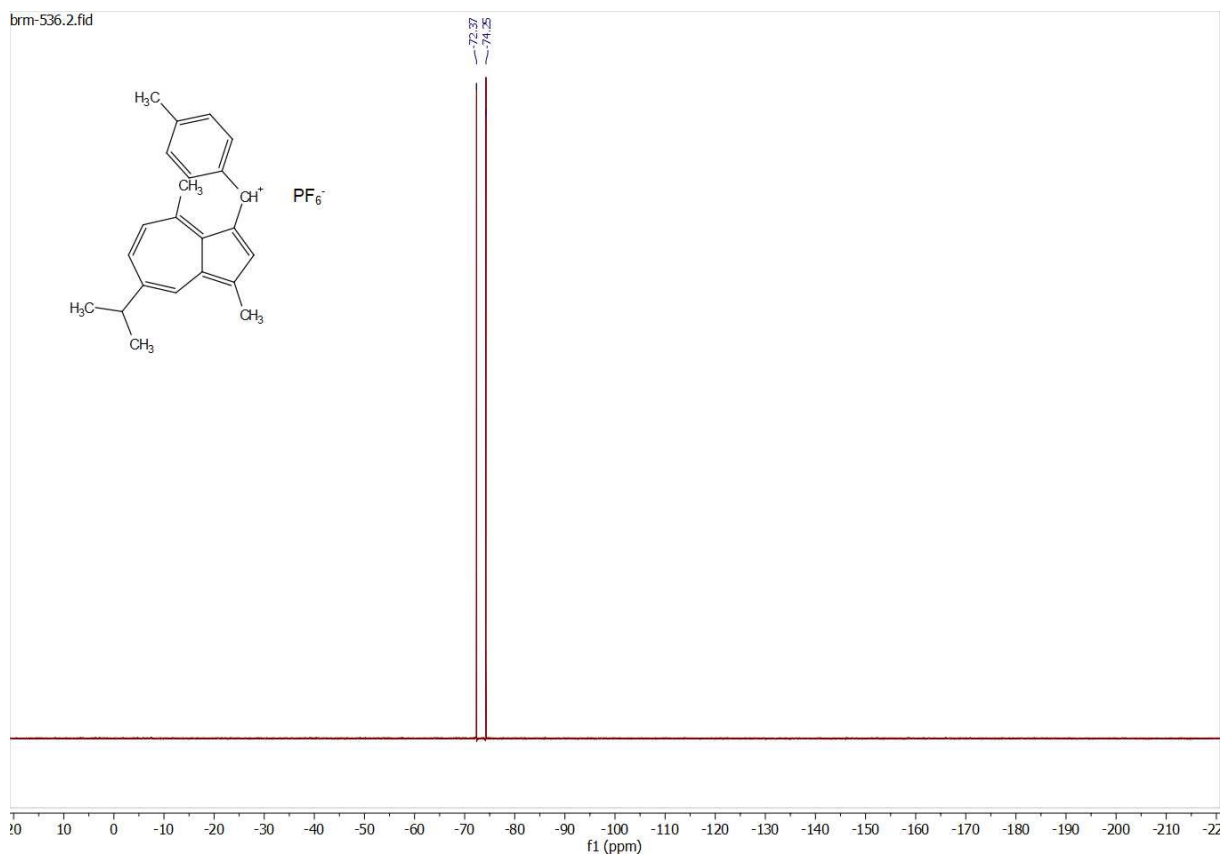

Figure S10.  $^{19}\text{F}$  NMR spectrum of compound **2a'** (376 MHz,  $\text{CD}_2\text{Cl}_2$ ).

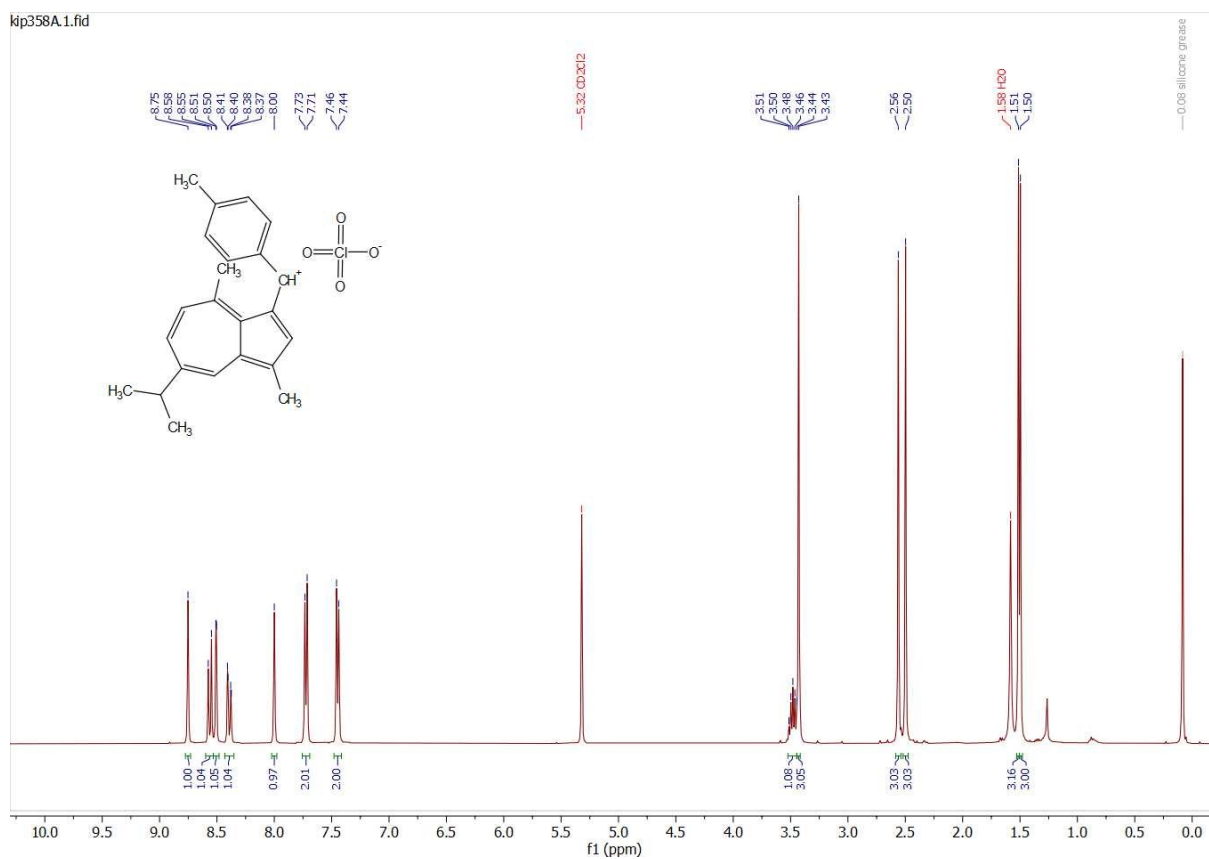

Figure S11. <sup>1</sup>H NMR spectrum of compound **2a''** (400 MHz, CD<sub>2</sub>Cl<sub>2</sub>).

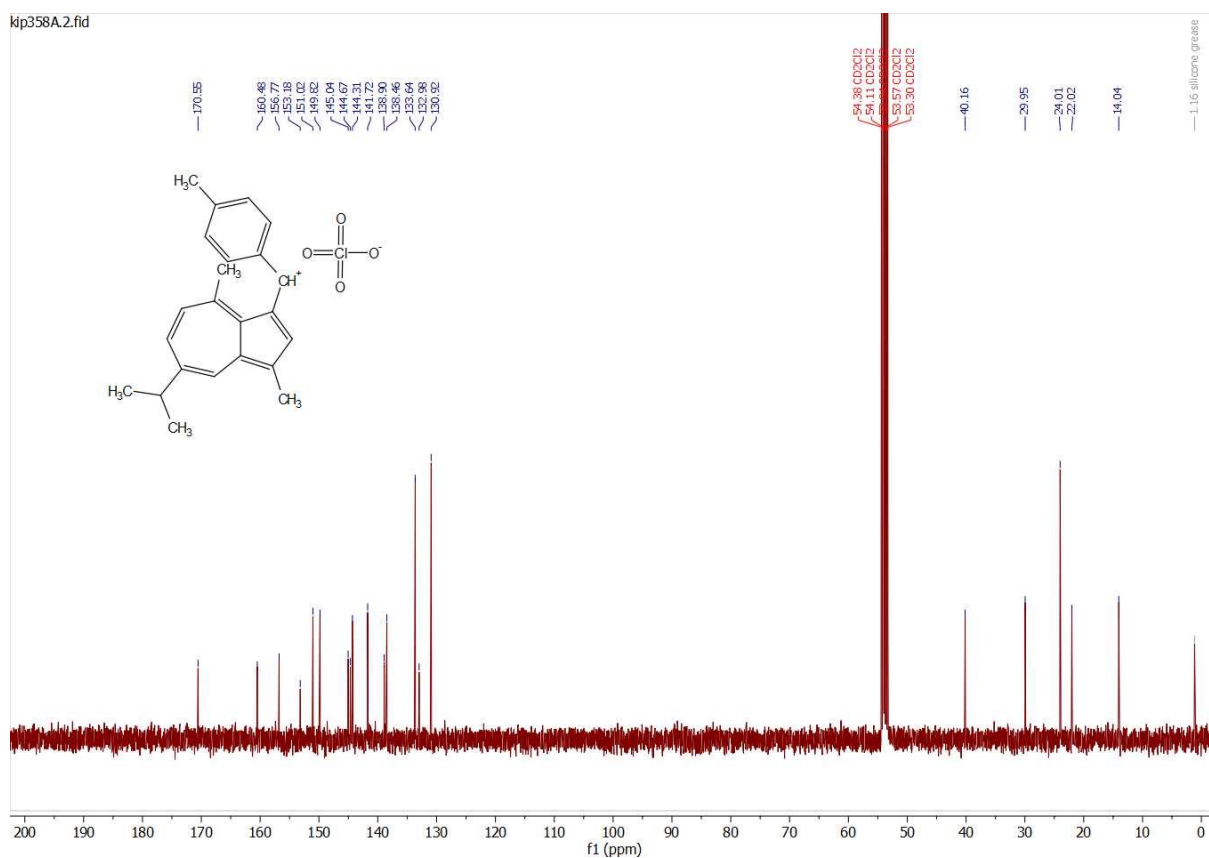

Figure S12. <sup>13</sup>C NMR spectrum of compound **2a''** (100 MHz, CD<sub>2</sub>Cl<sub>2</sub>).

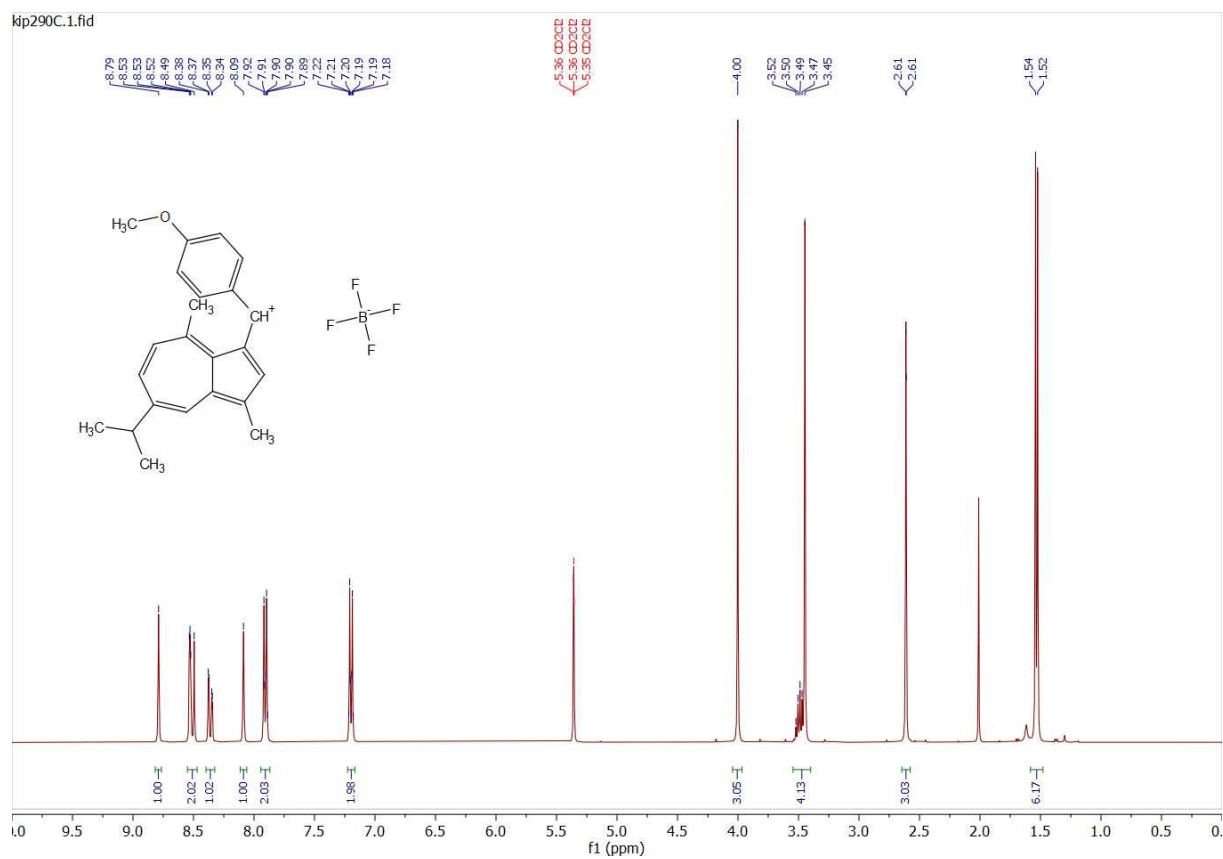

Figure S13.  $^1\text{H}$  NMR spectrum of compound **2b** (400 MHz,  $\text{CD}_2\text{Cl}_2$ ).

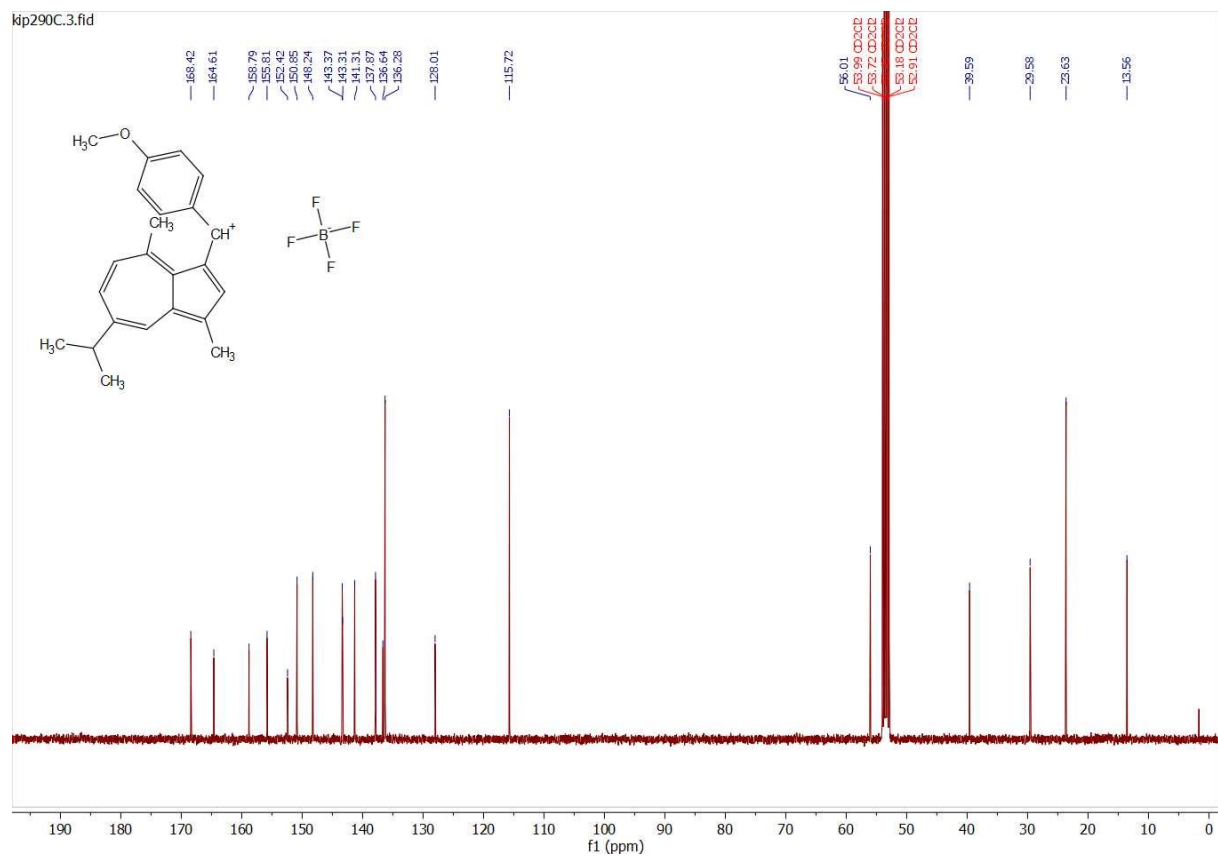

Figure S14.  $^{13}\text{C}$  NMR spectrum of compound **2b** (100 MHz,  $\text{CD}_2\text{Cl}_2$ ).

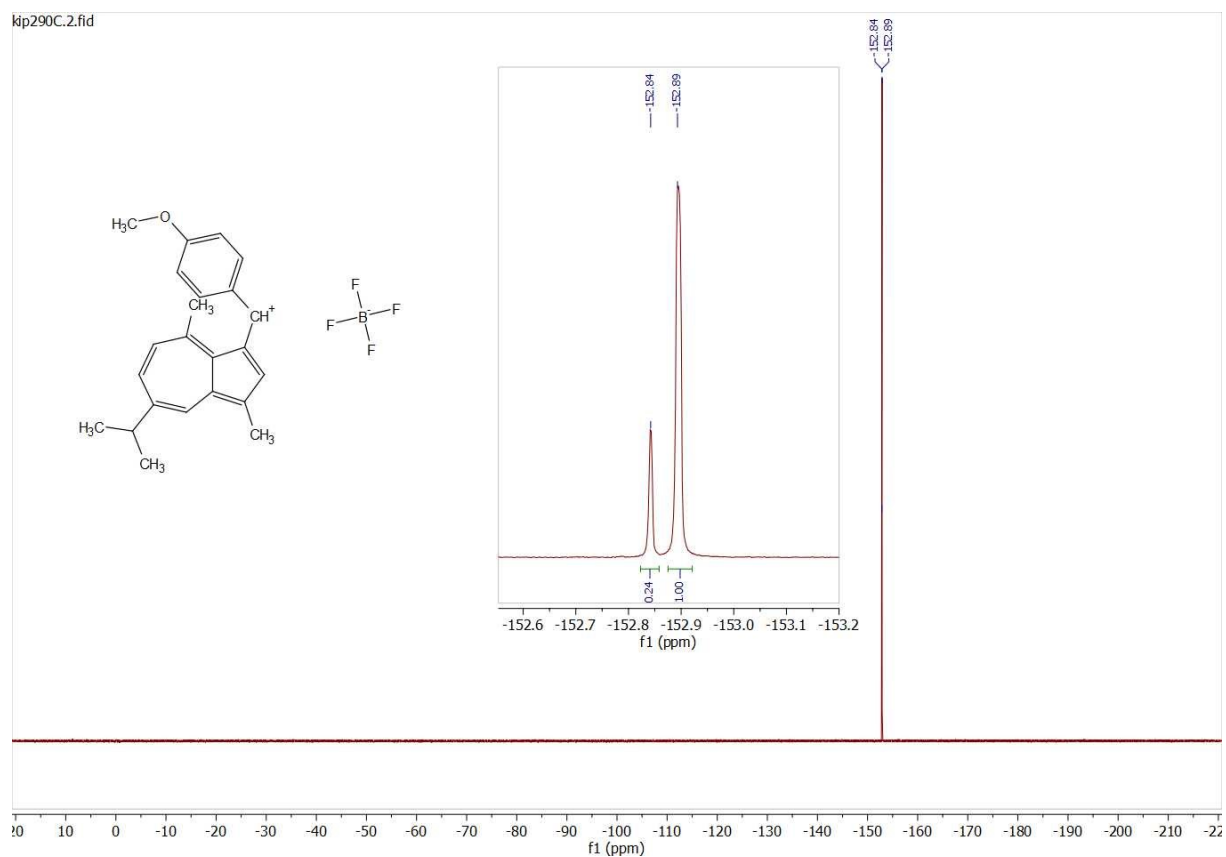

Figure S15.  $^{19}\text{F}$  NMR spectrum of compound **2b** (376 MHz,  $\text{CD}_2\text{Cl}_2$ ).

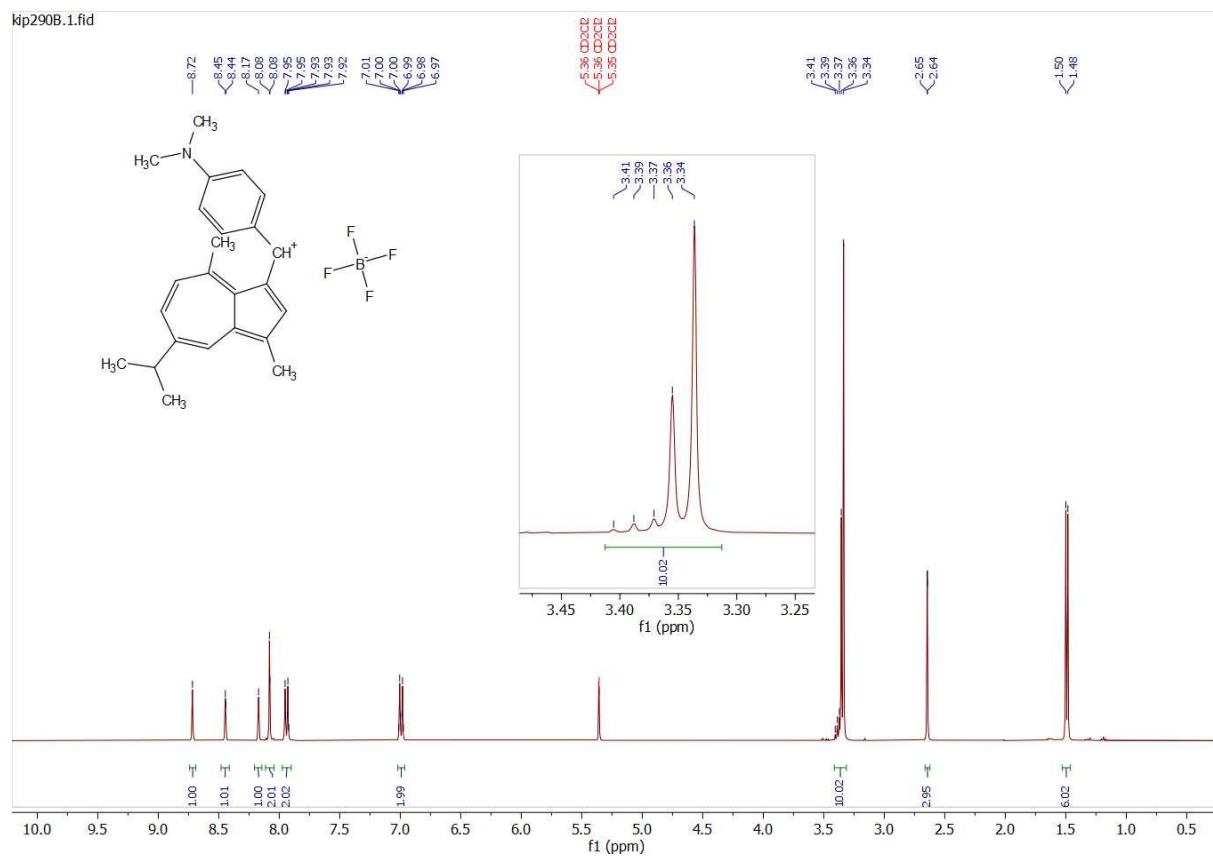

Figure S16.  $^1\text{H}$  NMR spectrum of compound **2c** (400 MHz,  $\text{CD}_2\text{Cl}_2$ ).



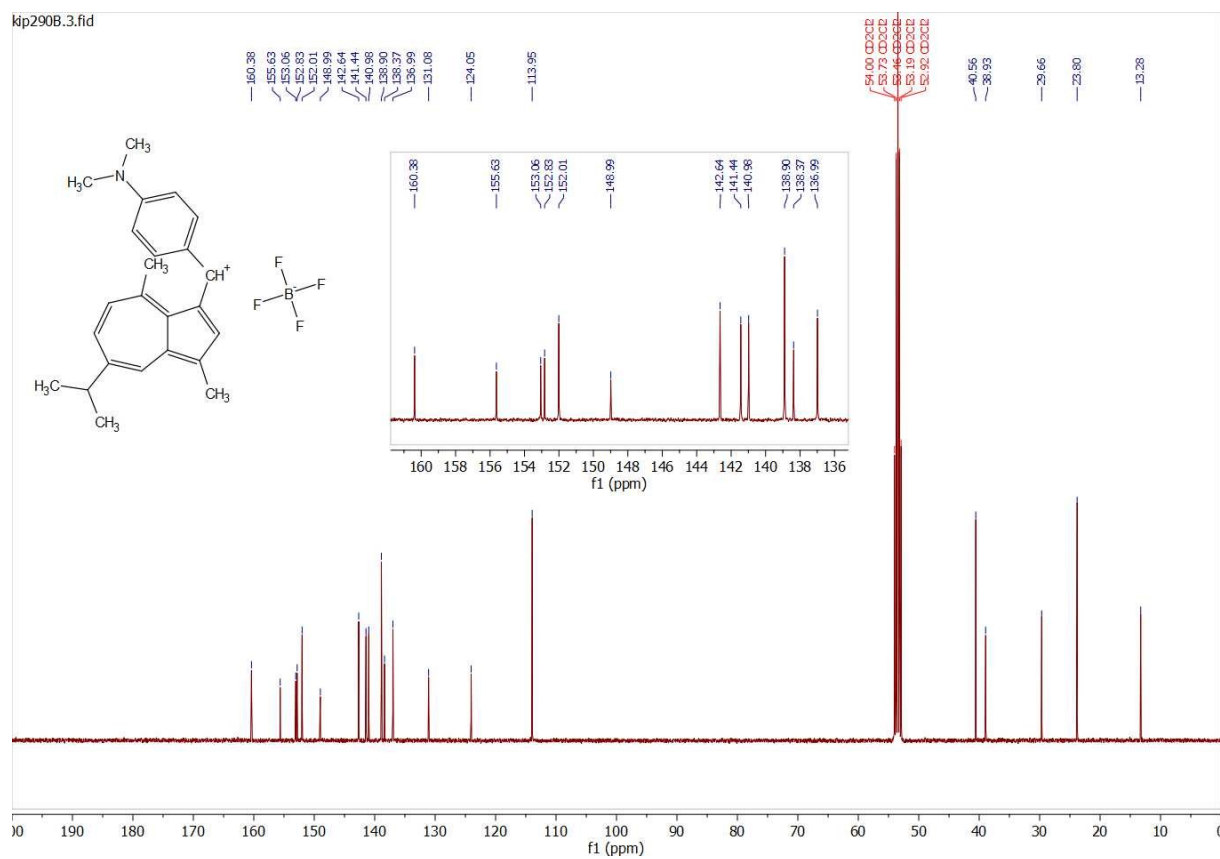

Figure S17. <sup>13</sup>C NMR spectrum of compound **2c** (100 MHz, CD<sub>2</sub>Cl<sub>2</sub>).

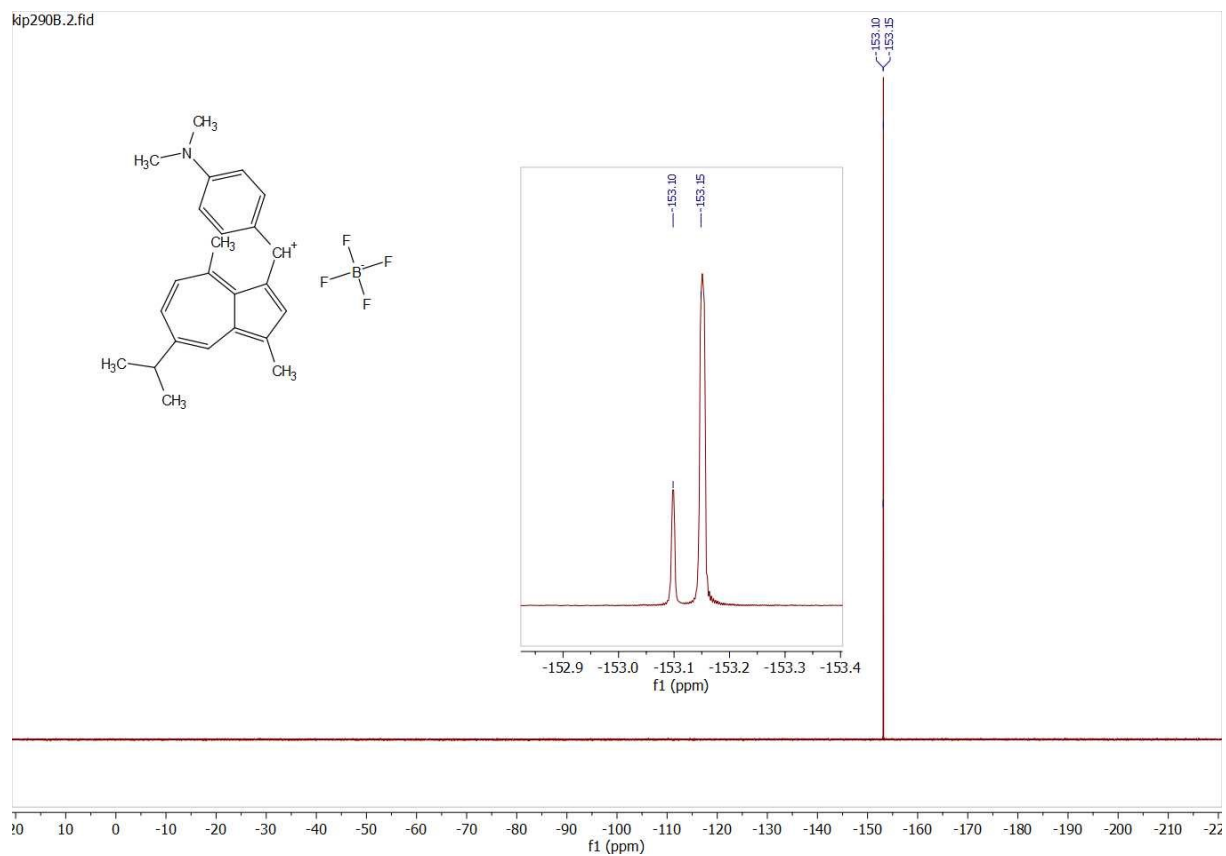

Figure S18. <sup>19</sup>F NMR spectrum of compound **2c** (376 MHz, CD<sub>2</sub>Cl<sub>2</sub>).

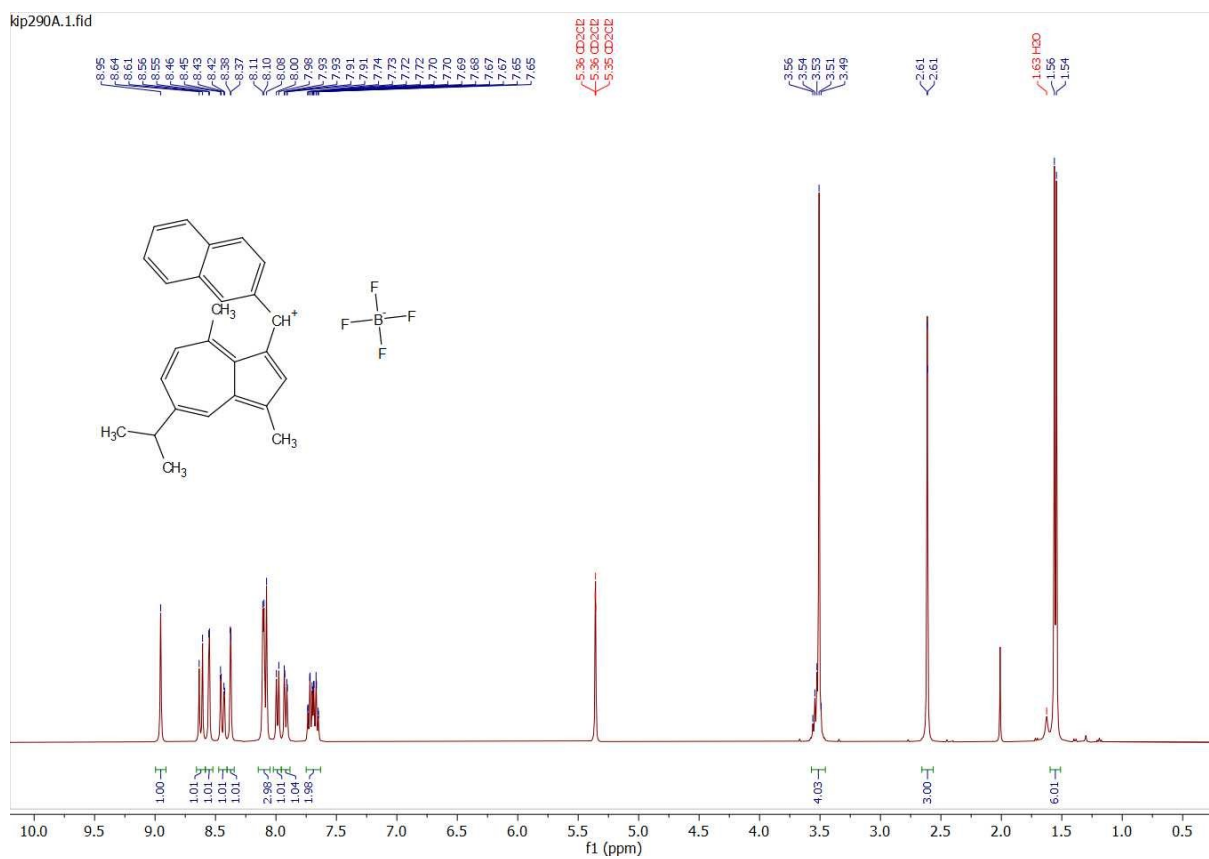

Figure S19.  $^1\text{H}$  NMR spectrum of compound **2d** (400 MHz,  $\text{CD}_2\text{Cl}_2$ ).

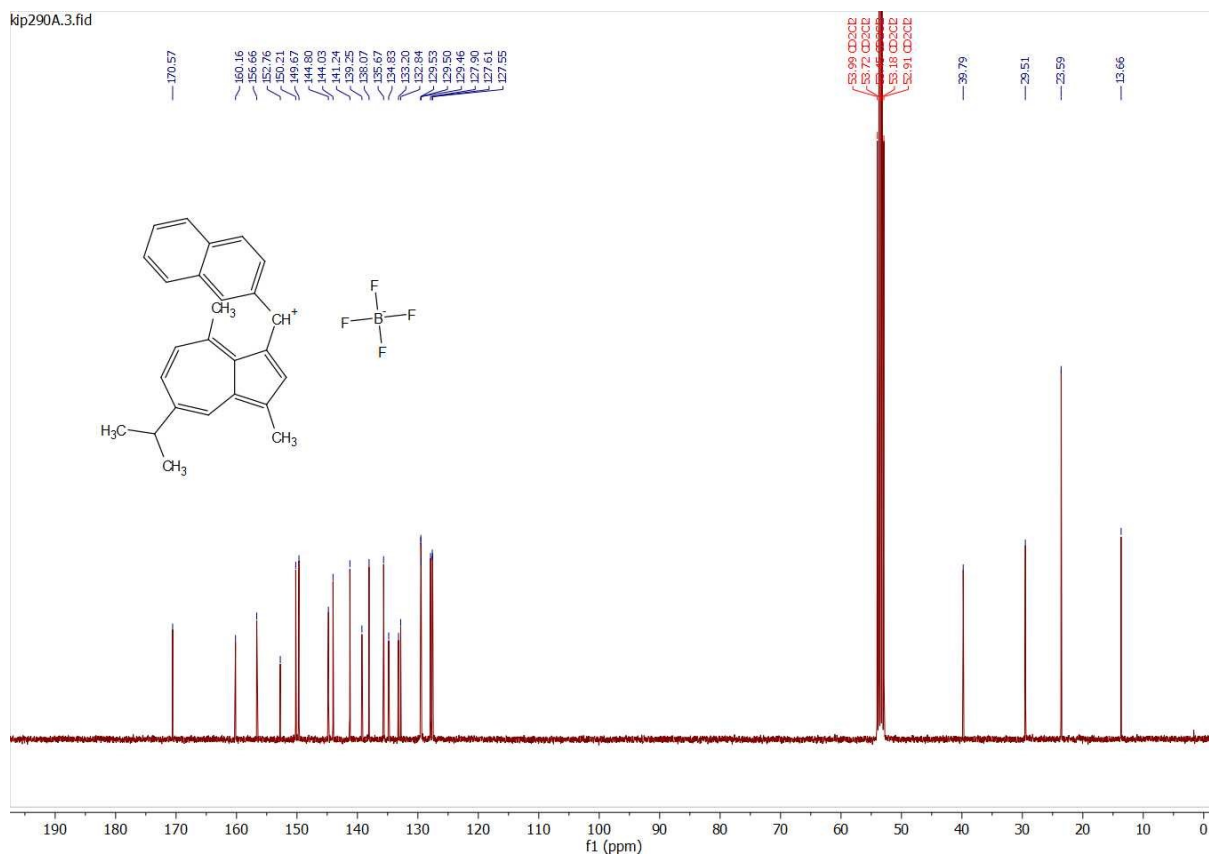

Figure S20.  $^{13}\text{C}$  NMR spectrum of compound **2d** (100 MHz,  $\text{CD}_2\text{Cl}_2$ ).

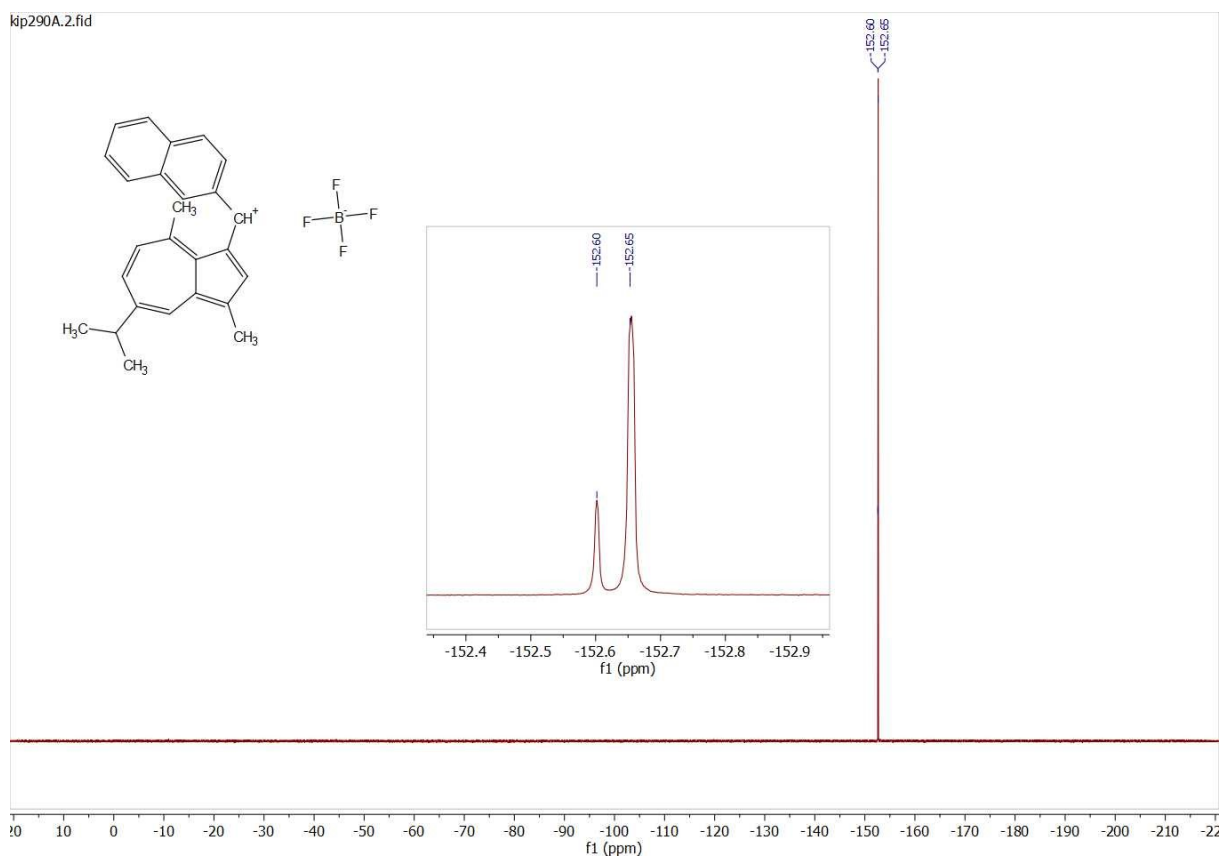

Figure S21.  $^{19}\text{F}$  NMR spectrum of compound **2d** (376 MHz,  $\text{CD}_2\text{Cl}_2$ ).

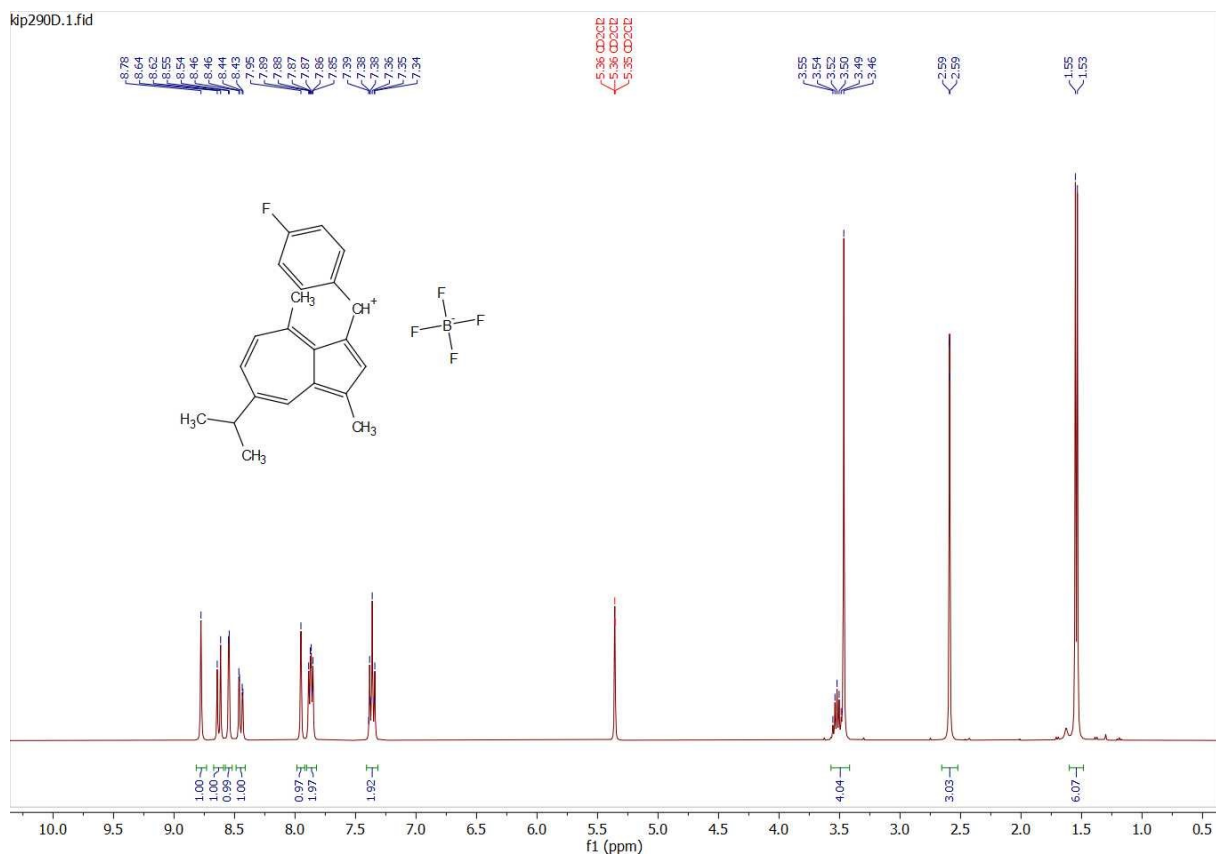

Figure S22.  $^1\text{H}$  NMR spectrum of compound **2e** (400 MHz,  $\text{CD}_2\text{Cl}_2$ ).

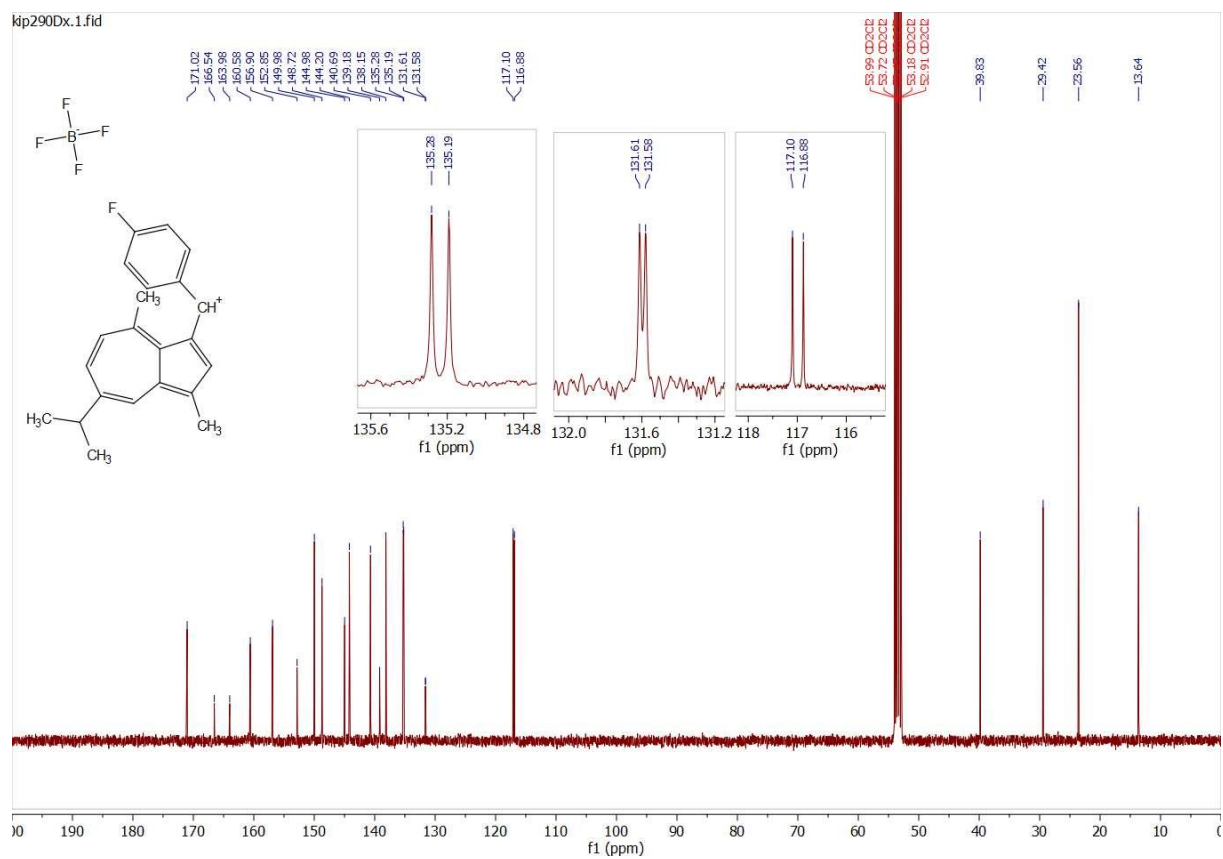

Figure S23.  $^{13}\text{C}$  NMR spectrum of compound **2e** (100 MHz,  $\text{CD}_2\text{Cl}_2$ ).

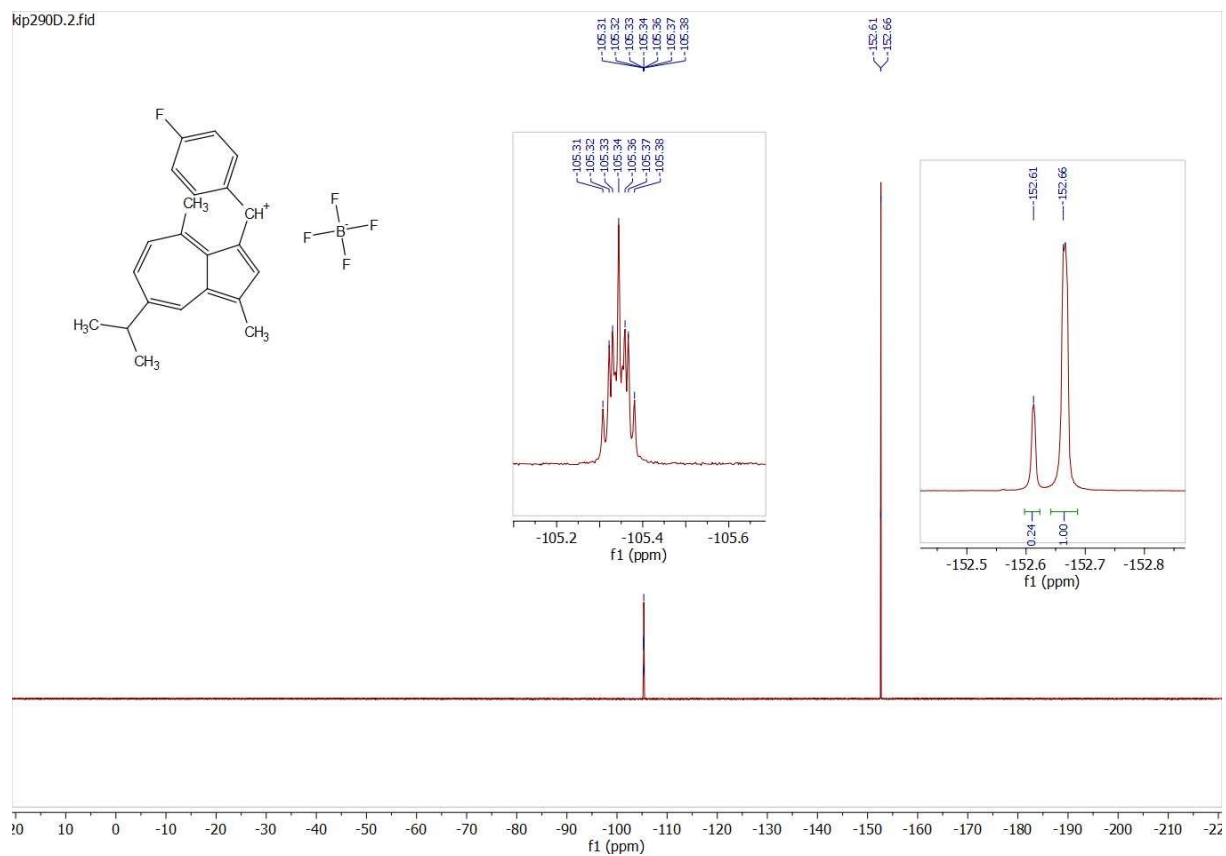

Figure S24.  $^{19}\text{F}$  NMR spectrum of compound **2e** (376 MHz,  $\text{CD}_2\text{Cl}_2$ ).

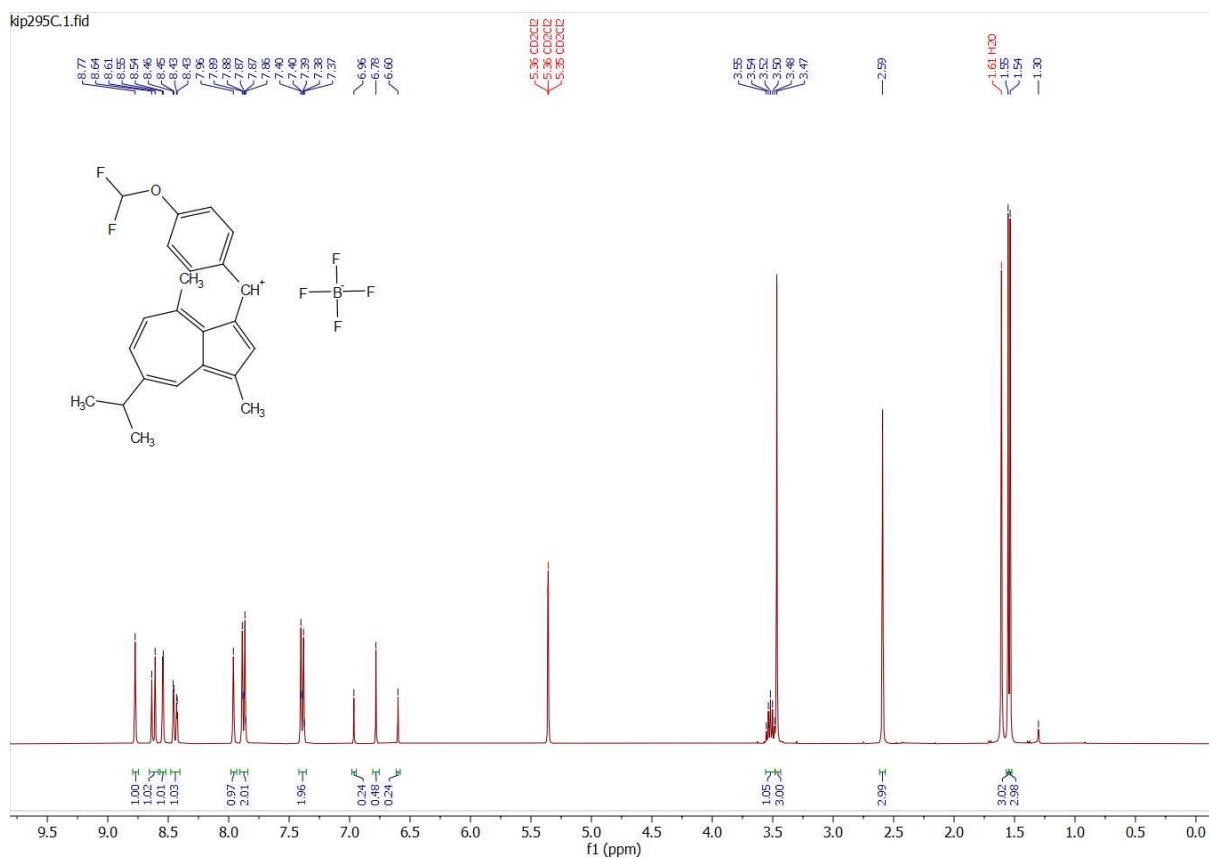

Figure S25.  $^1\text{H}$  NMR spectrum of compound **2f** (400 MHz,  $\text{CD}_2\text{Cl}_2$ ).

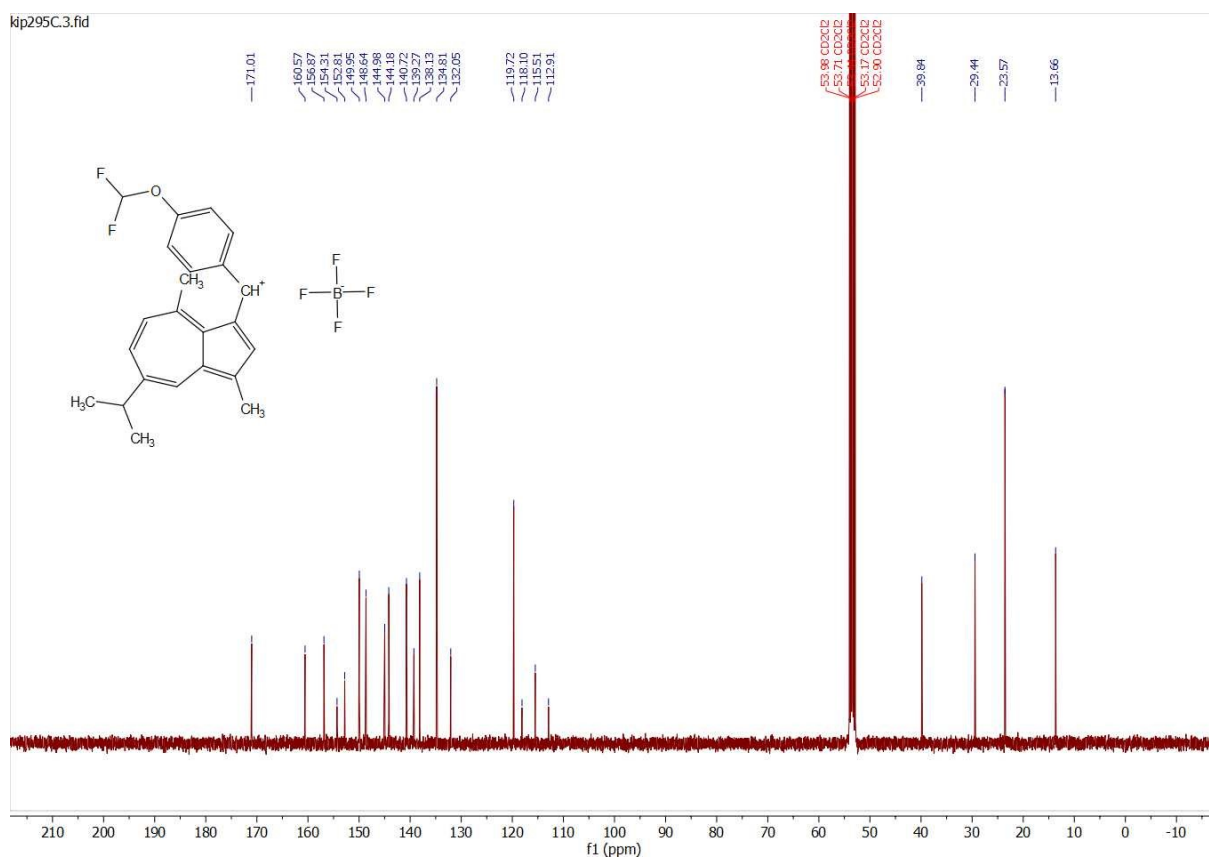

Figure S26.  $^{13}\text{C}$  NMR spectrum of compound **2f** (100 MHz,  $\text{CD}_2\text{Cl}_2$ ).

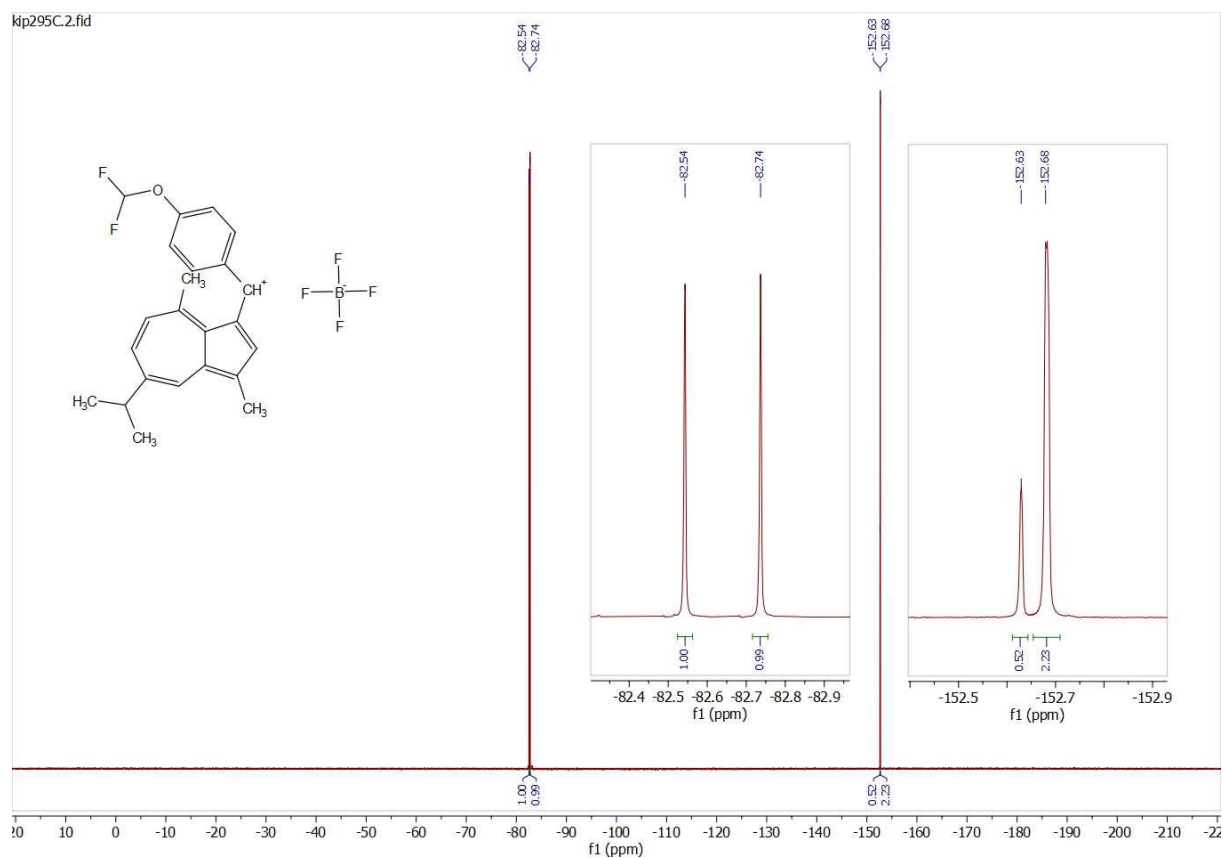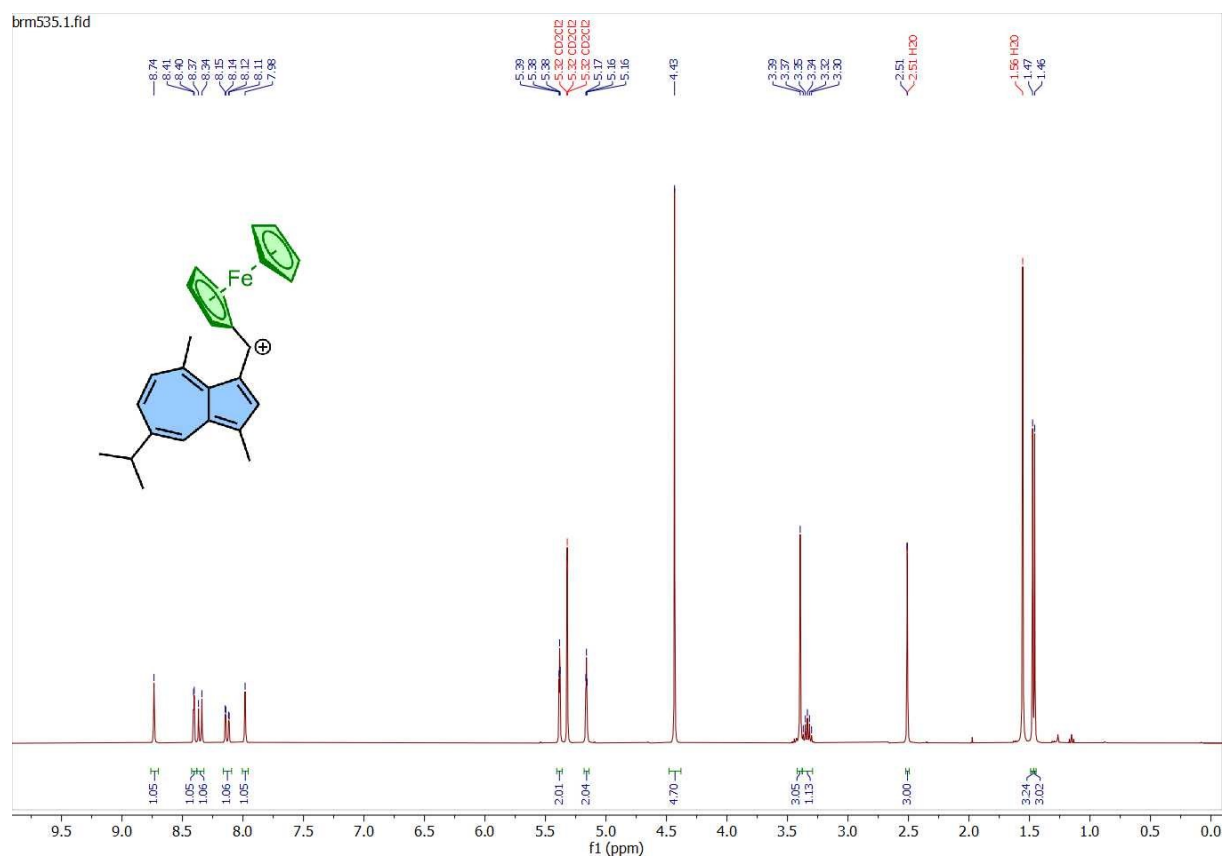

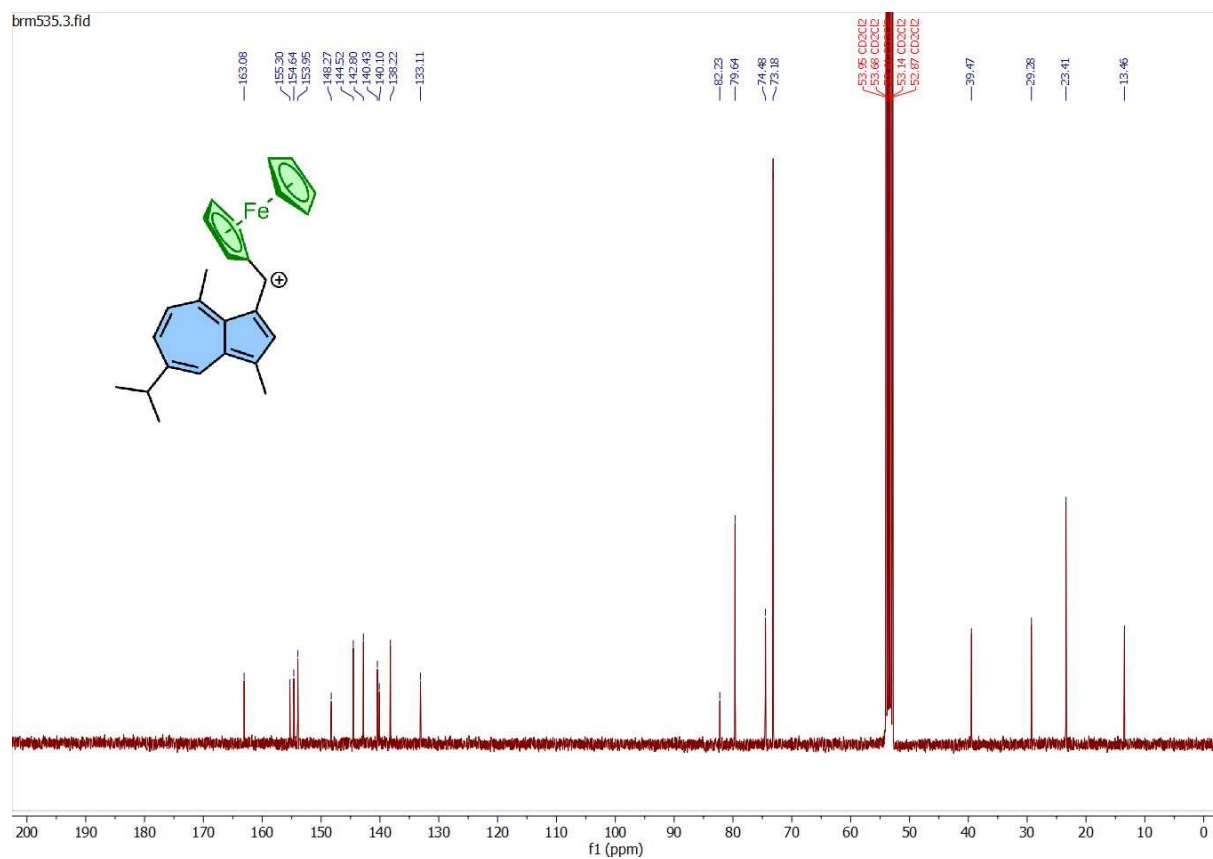

Figure S29. <sup>13</sup>C NMR spectrum of compound **2g** (100 MHz, CD<sub>2</sub>Cl<sub>2</sub>).

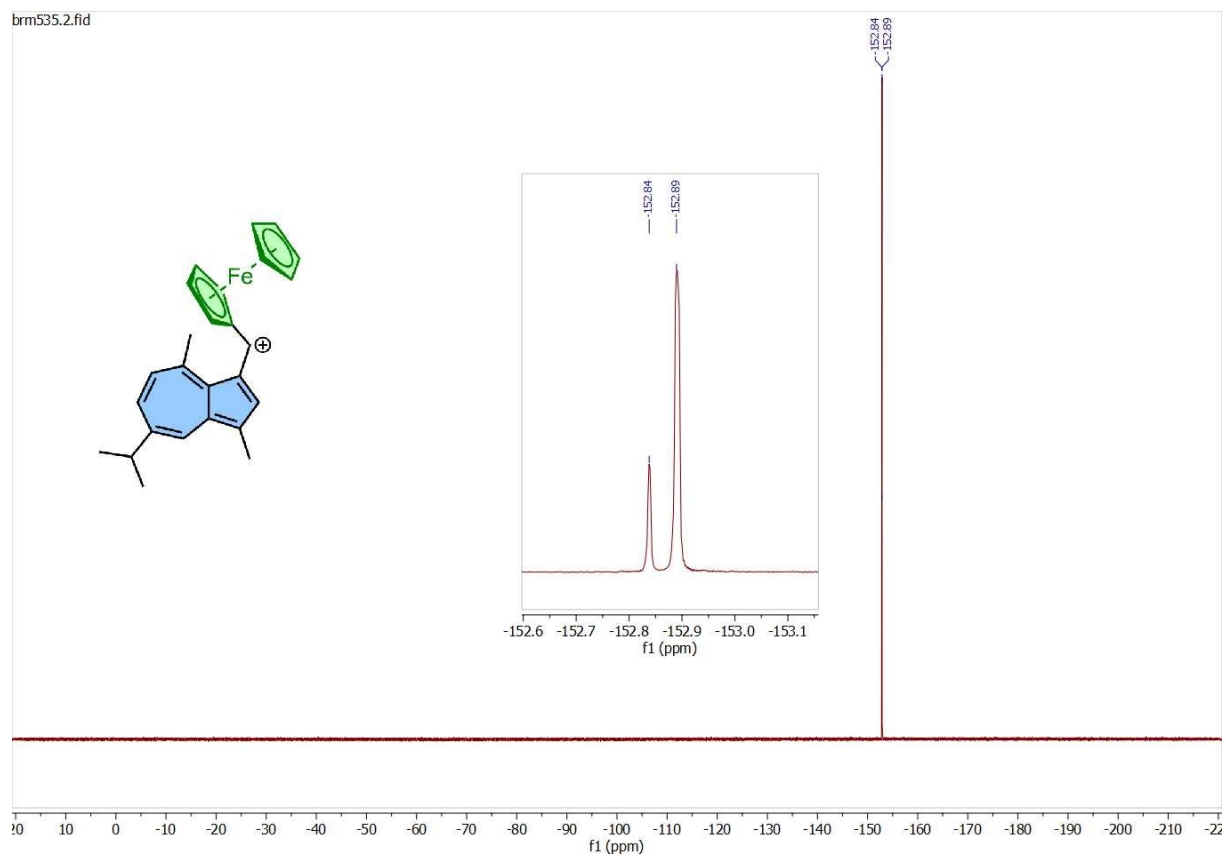

Figure S30. <sup>19</sup>F NMR spectrum of compound **2g** (376 MHz, CD<sub>2</sub>Cl<sub>2</sub>).





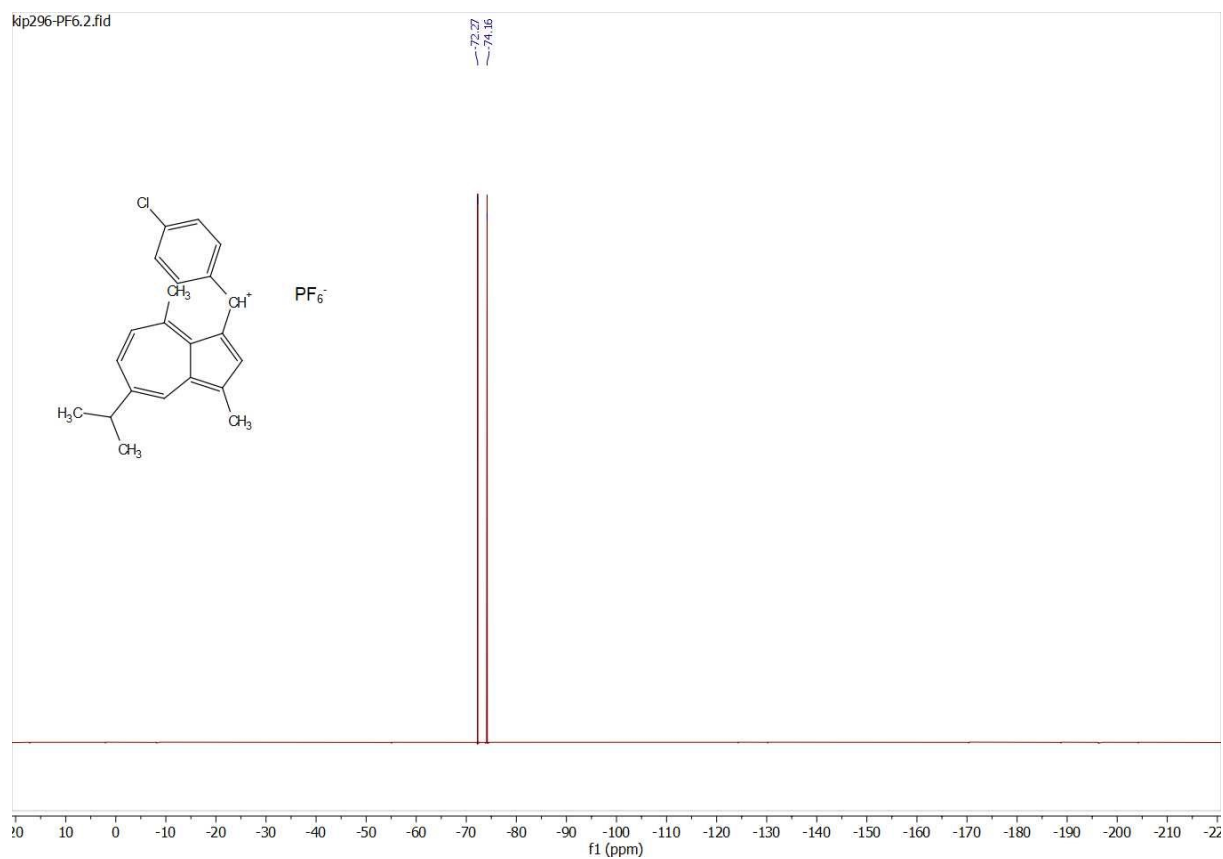

**Figure S33.**  $^{19}\text{F}$  NMR spectrum of compound **2h** (376 MHz,  $\text{CD}_2\text{Cl}_2$ ).

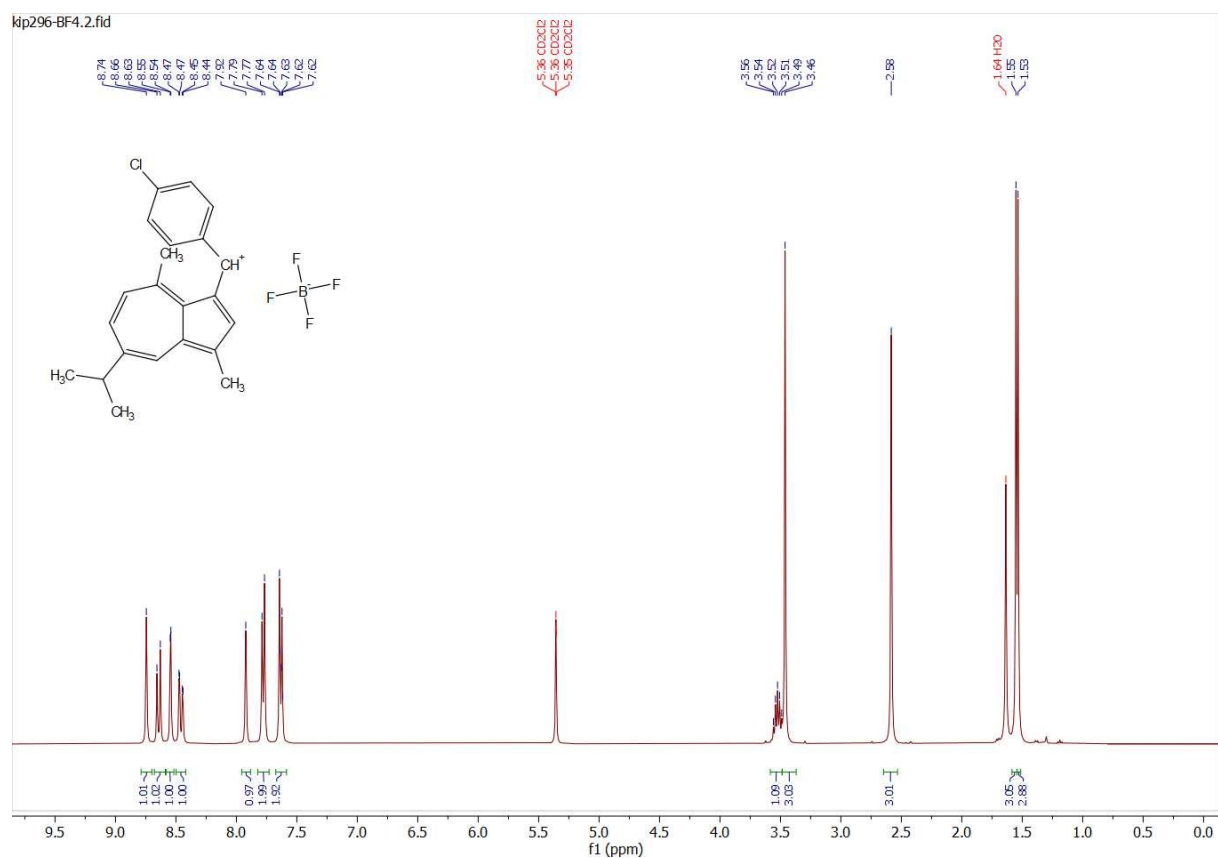

**Figure S34.**  $^1\text{H}$  NMR spectrum of compound **2h'** (400 MHz,  $\text{CD}_2\text{Cl}_2$ ).

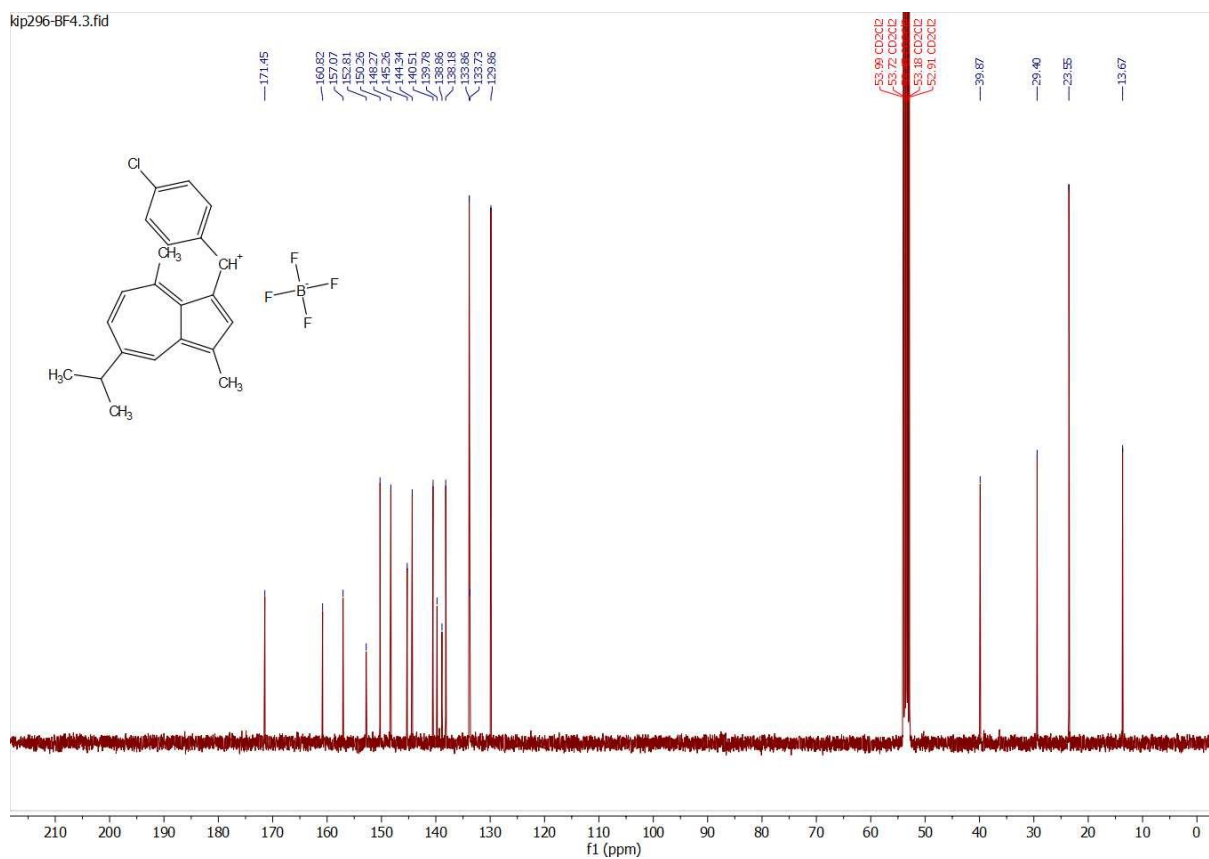

Figure S35. <sup>13</sup>C NMR spectrum of compound **2h'** (100 MHz, CD<sub>2</sub>Cl<sub>2</sub>).

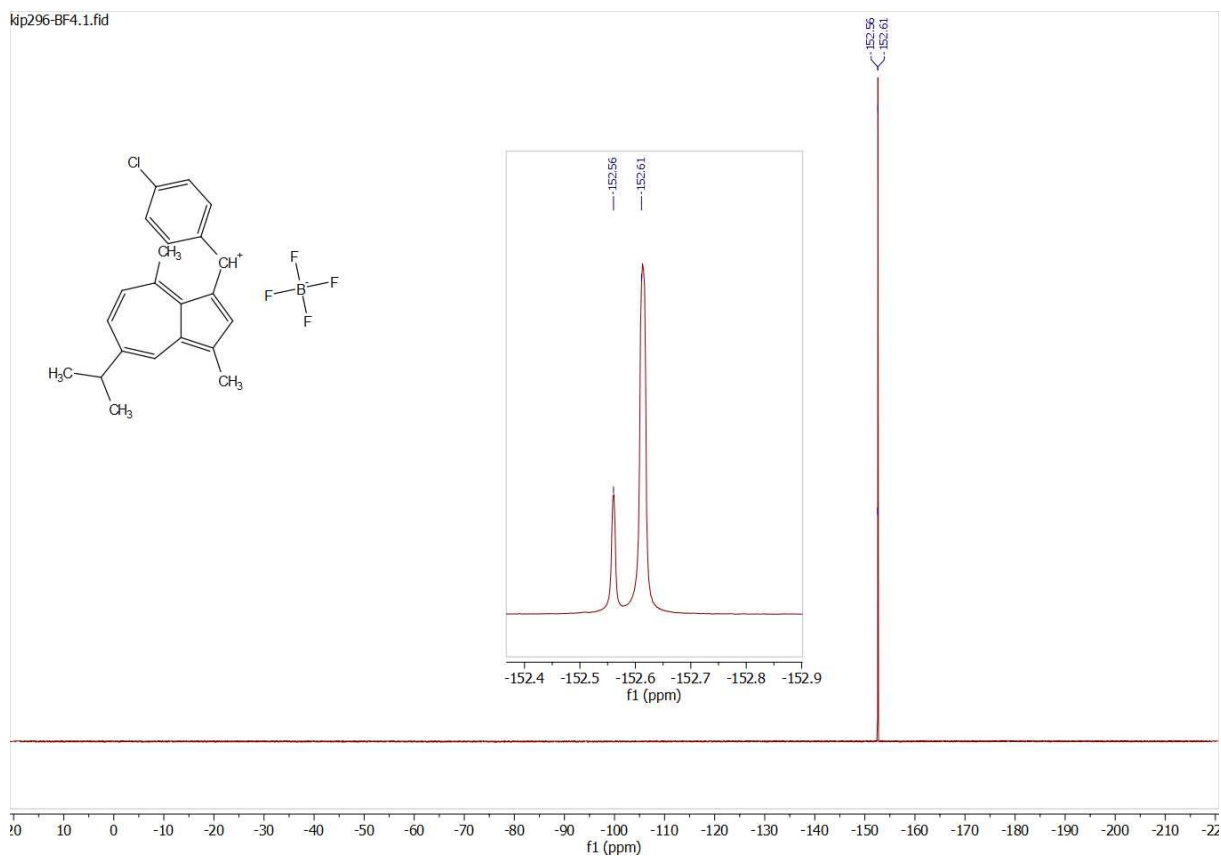

Figure S36. <sup>19</sup>F NMR spectrum of compound **2h'** (376 MHz, CD<sub>2</sub>Cl<sub>2</sub>).

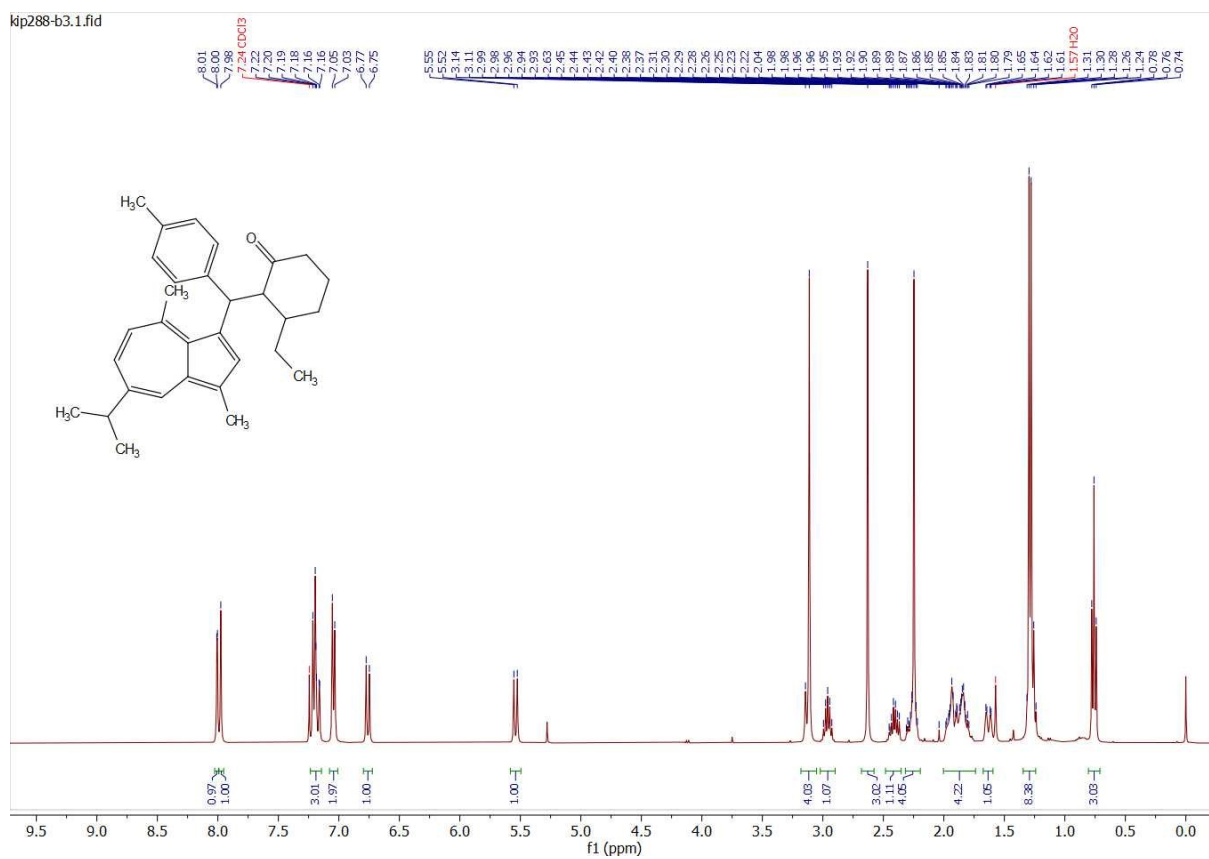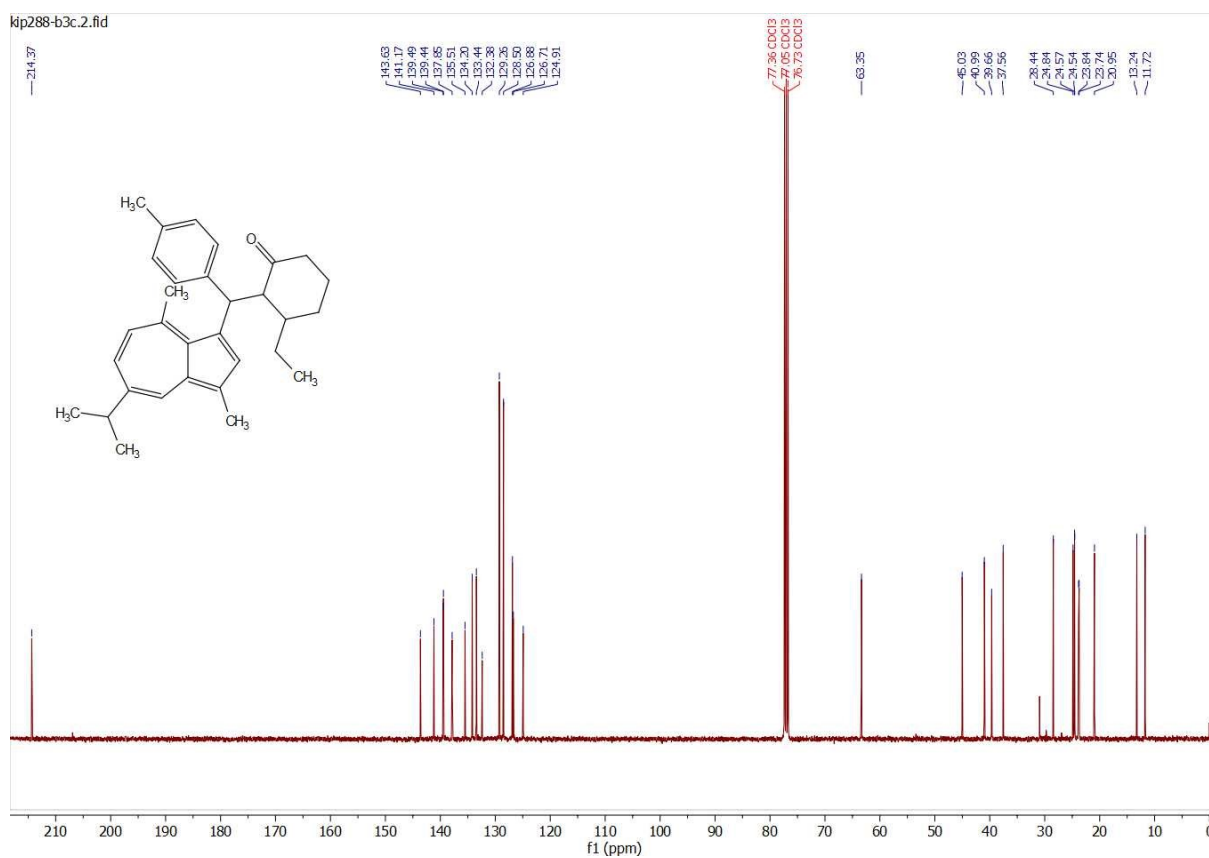



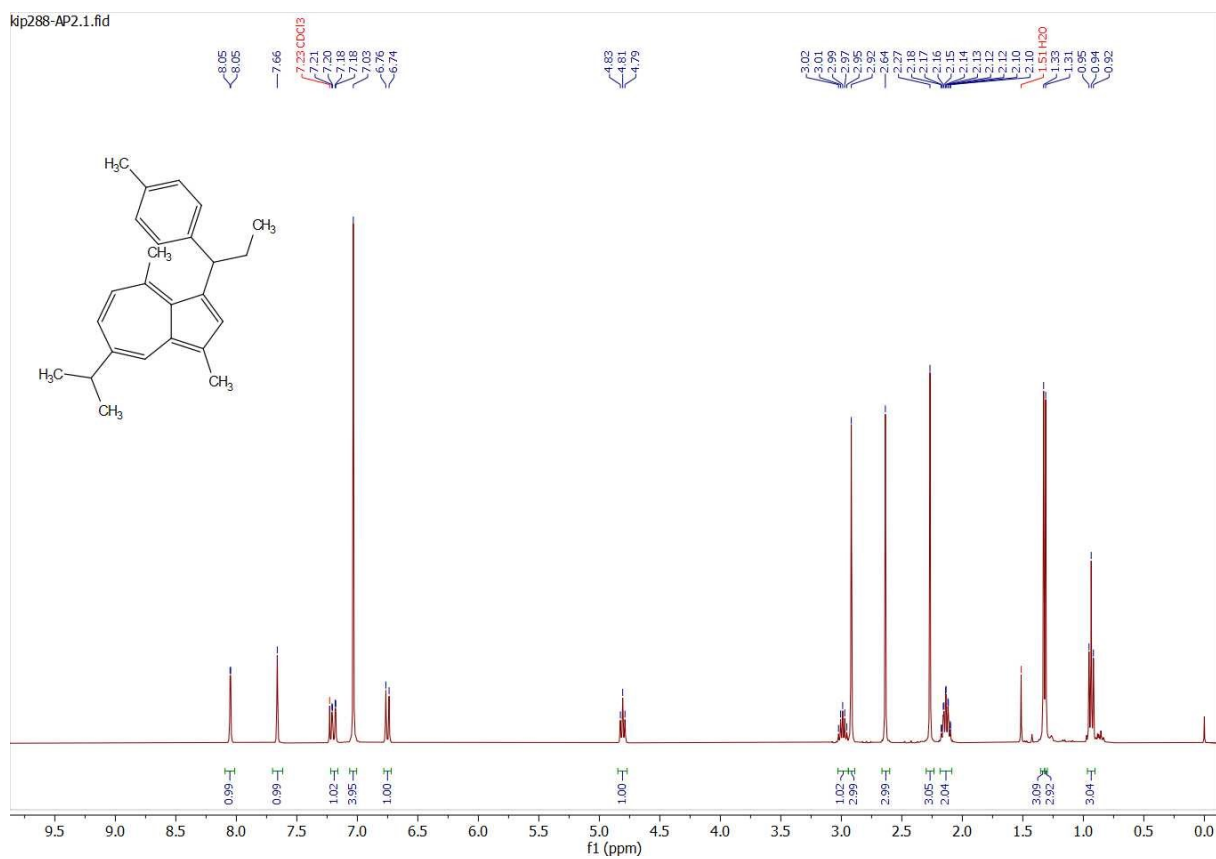

Figure S41.  $^1\text{H}$  NMR spectrum of compound **6a** (400 MHz,  $\text{CDCl}_3$ ).

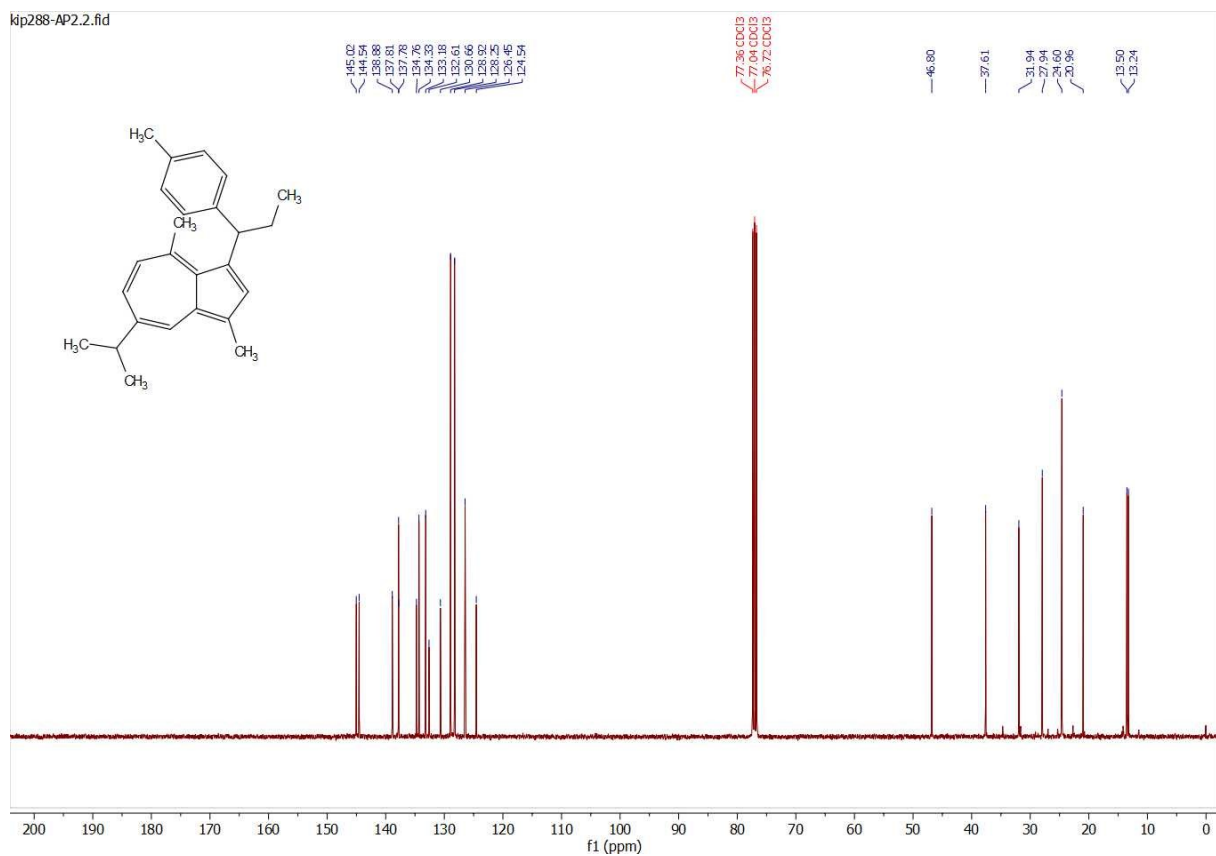

Figure S42.  $^{13}\text{C}$  NMR spectrum of compound **6a** (100 MHz,  $\text{CDCl}_3$ ).

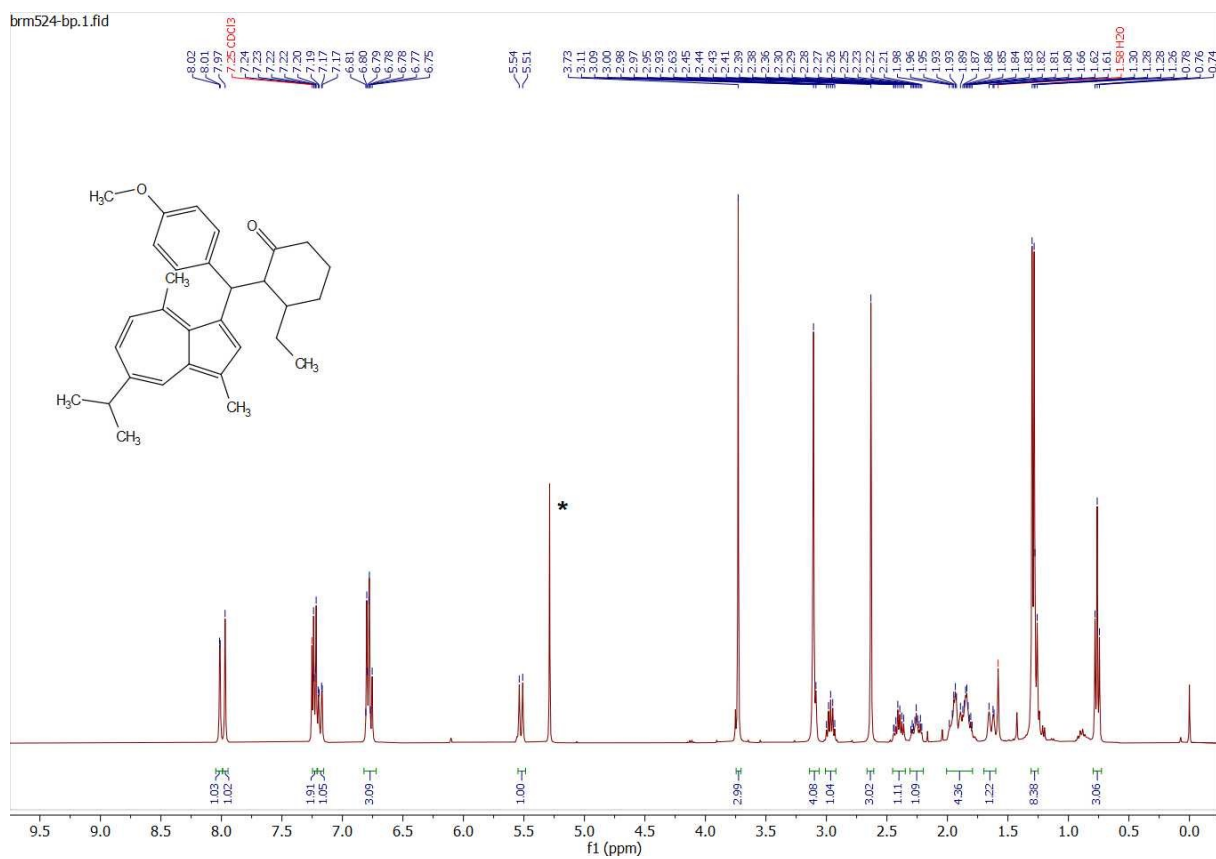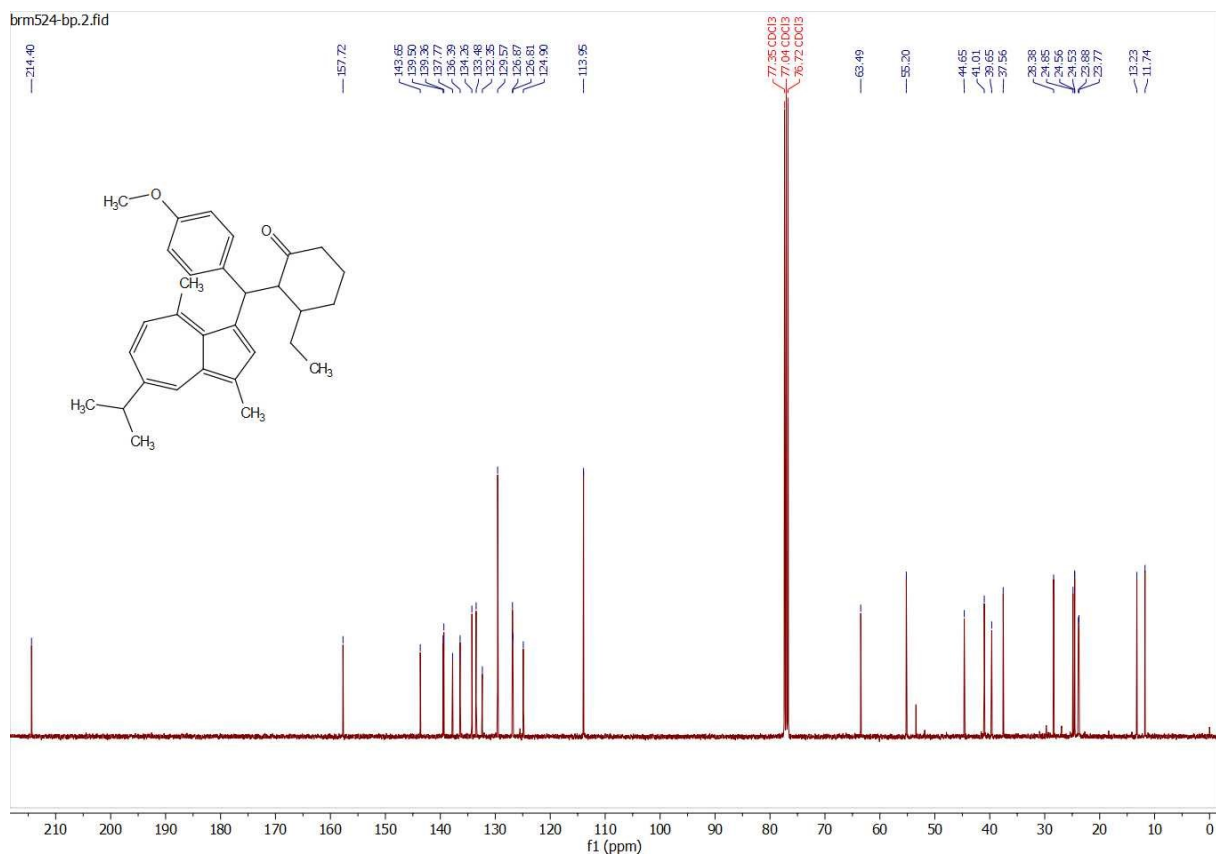

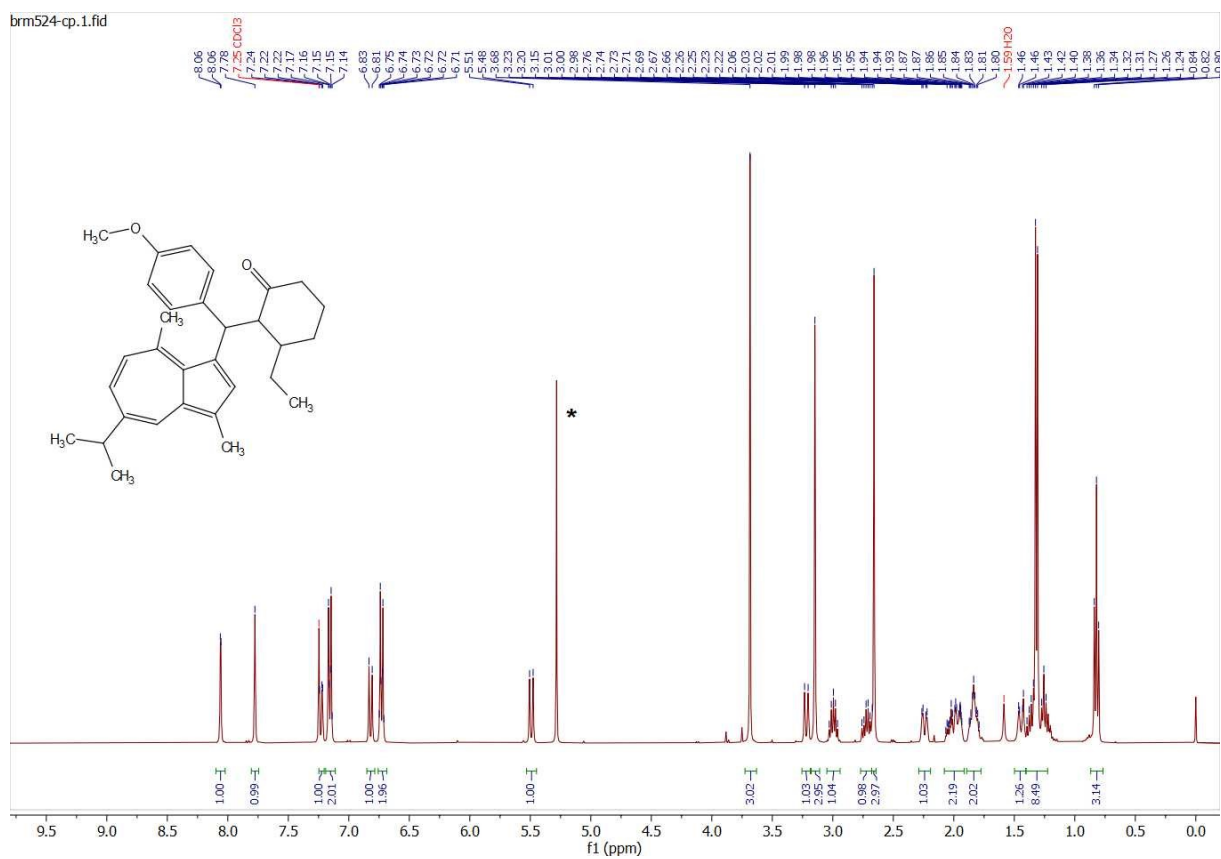

Figure S45.  $^1\text{H}$  NMR spectrum of compound **5ab/diastereomer 2** (400 MHz,  $\text{CDCl}_3$ ).

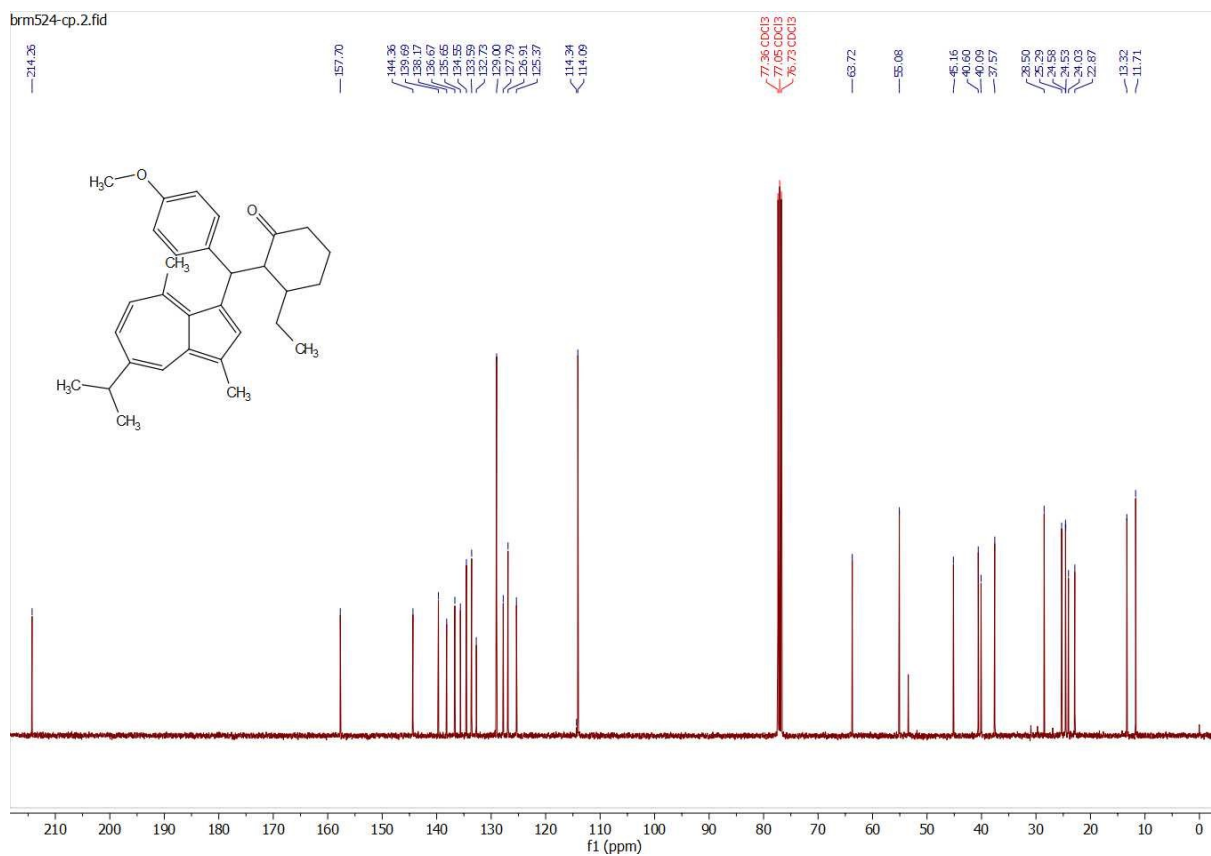

Figure S46.  $^{13}\text{C}$  NMR spectrum of compound **5ab/diastereomer 2** (100 MHz,  $\text{CDCl}_3$ ).



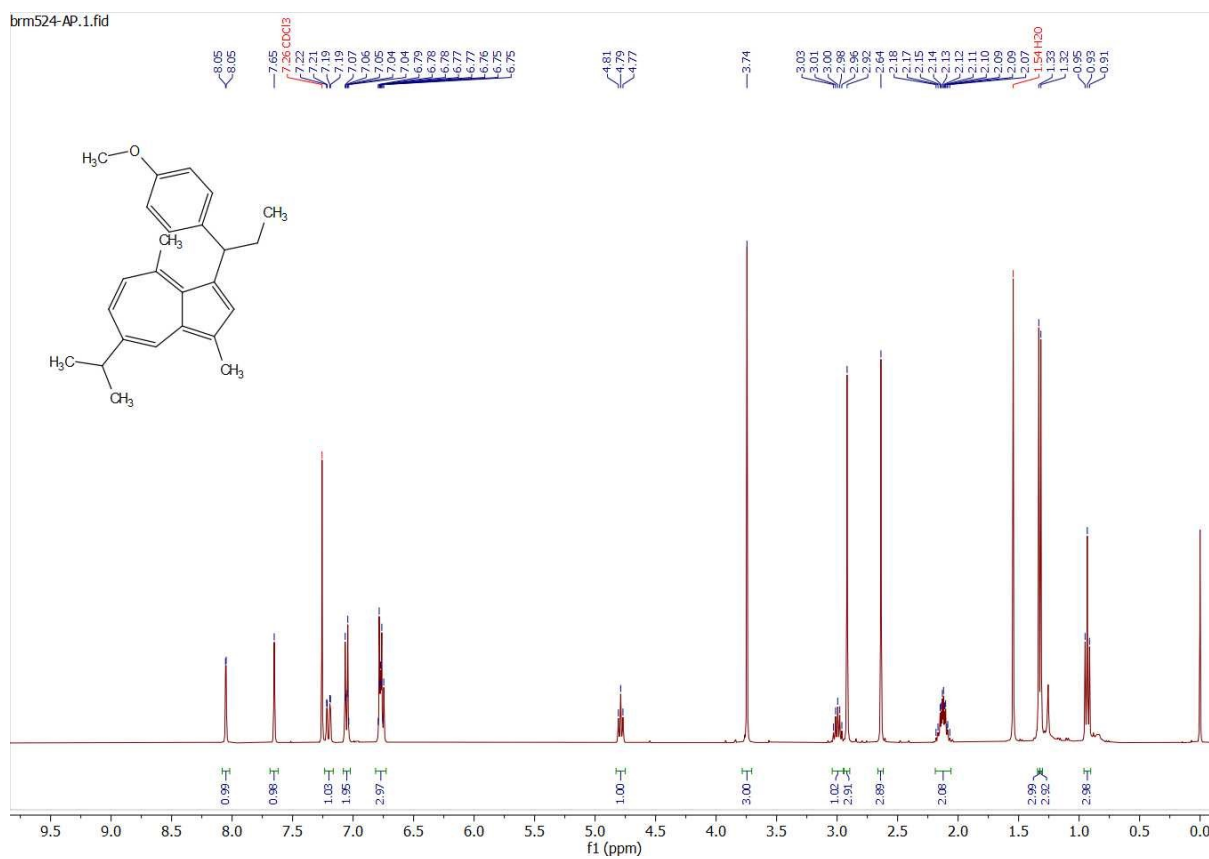

Figure S47. <sup>1</sup>H NMR spectrum of compound **6b** (400 MHz, CDCl<sub>3</sub>).

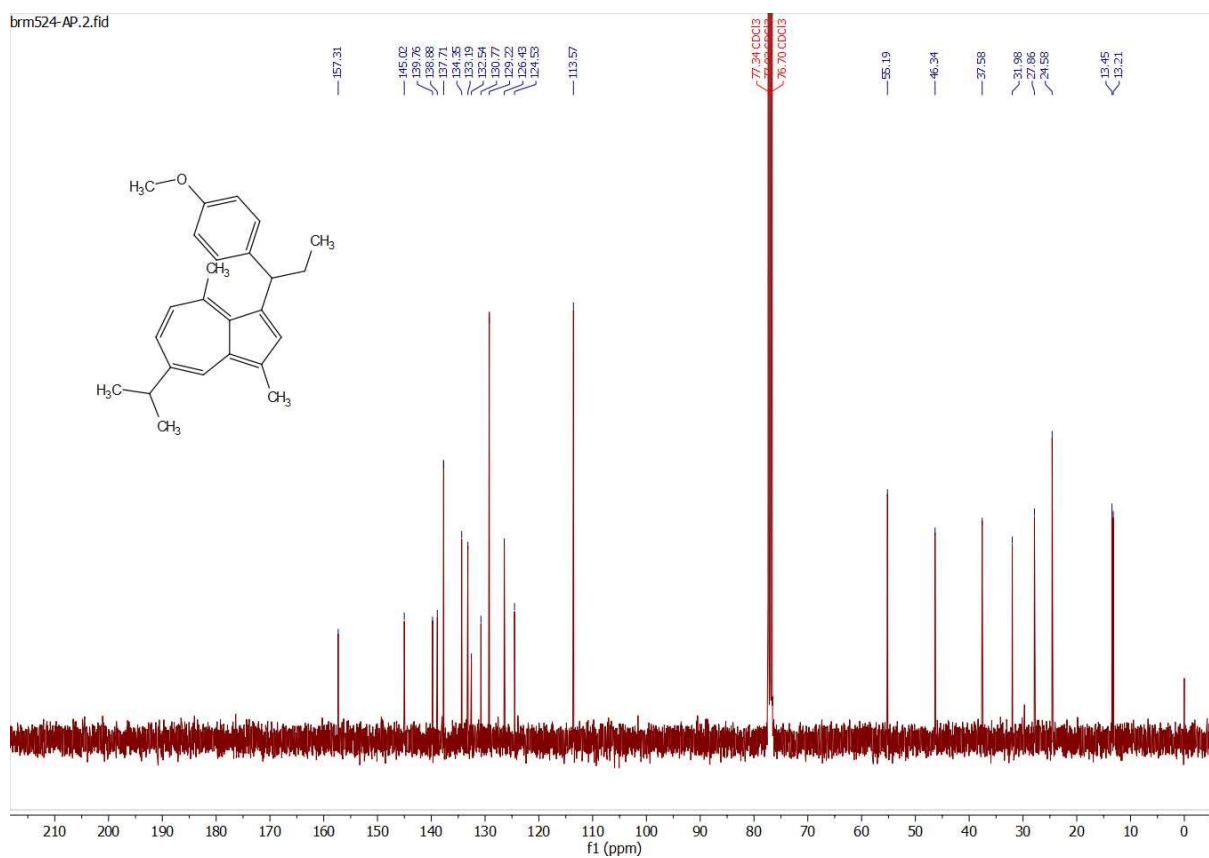

Figure S48. <sup>13</sup>C NMR spectrum of compound **6b** (100 MHz, CDCl<sub>3</sub>).

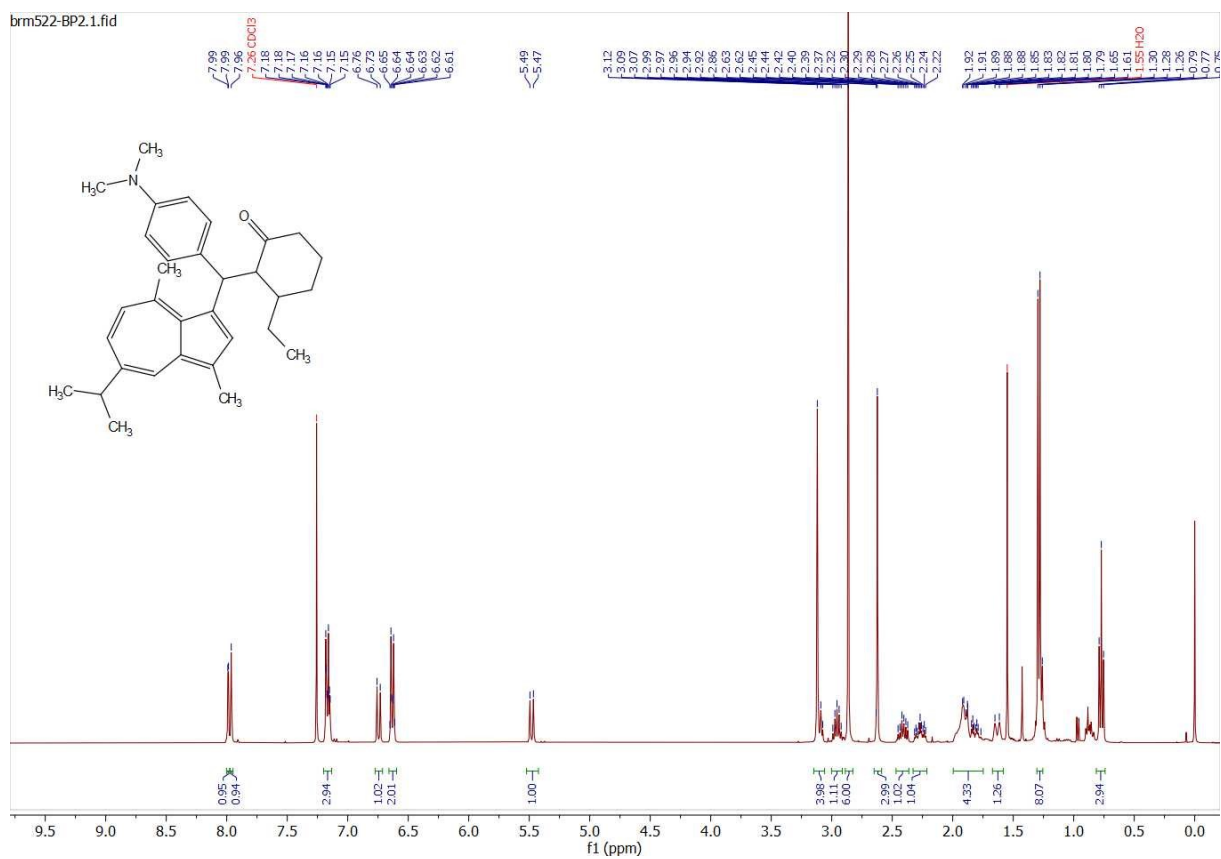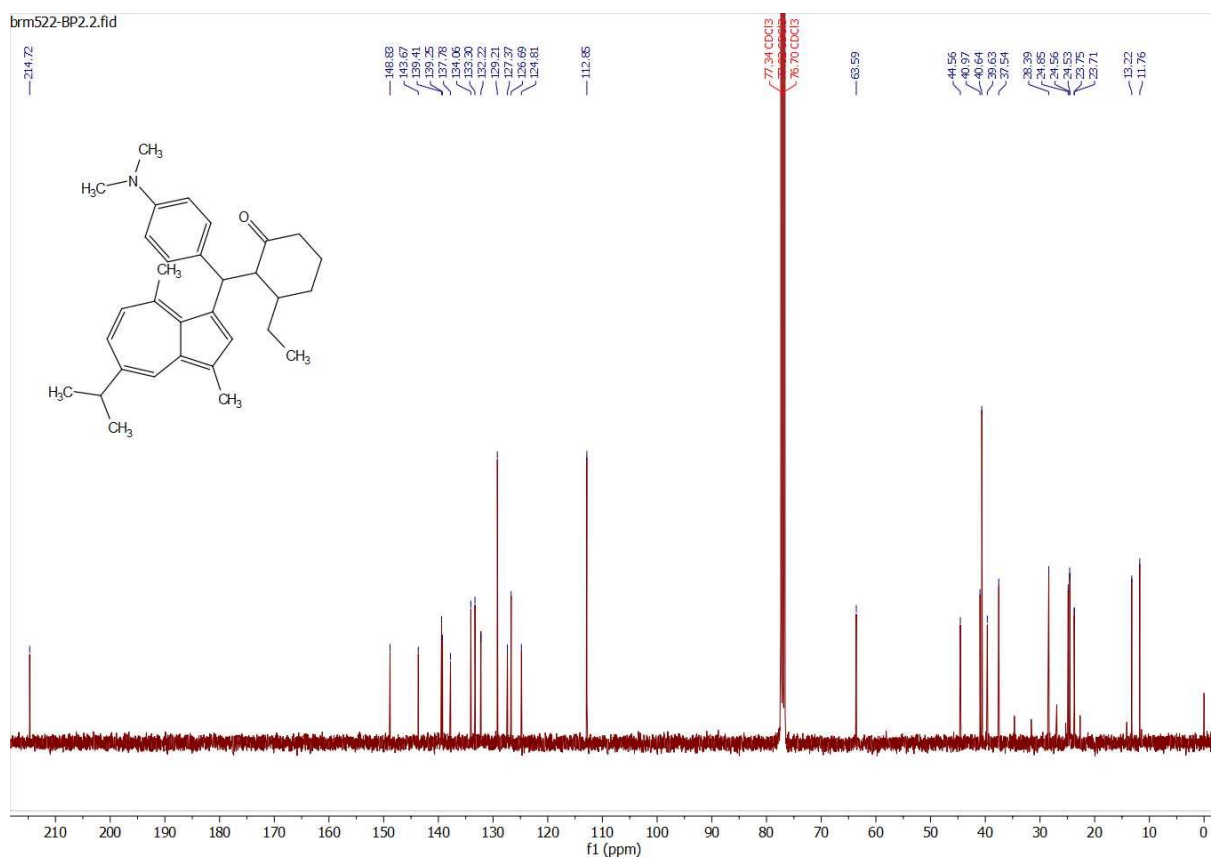



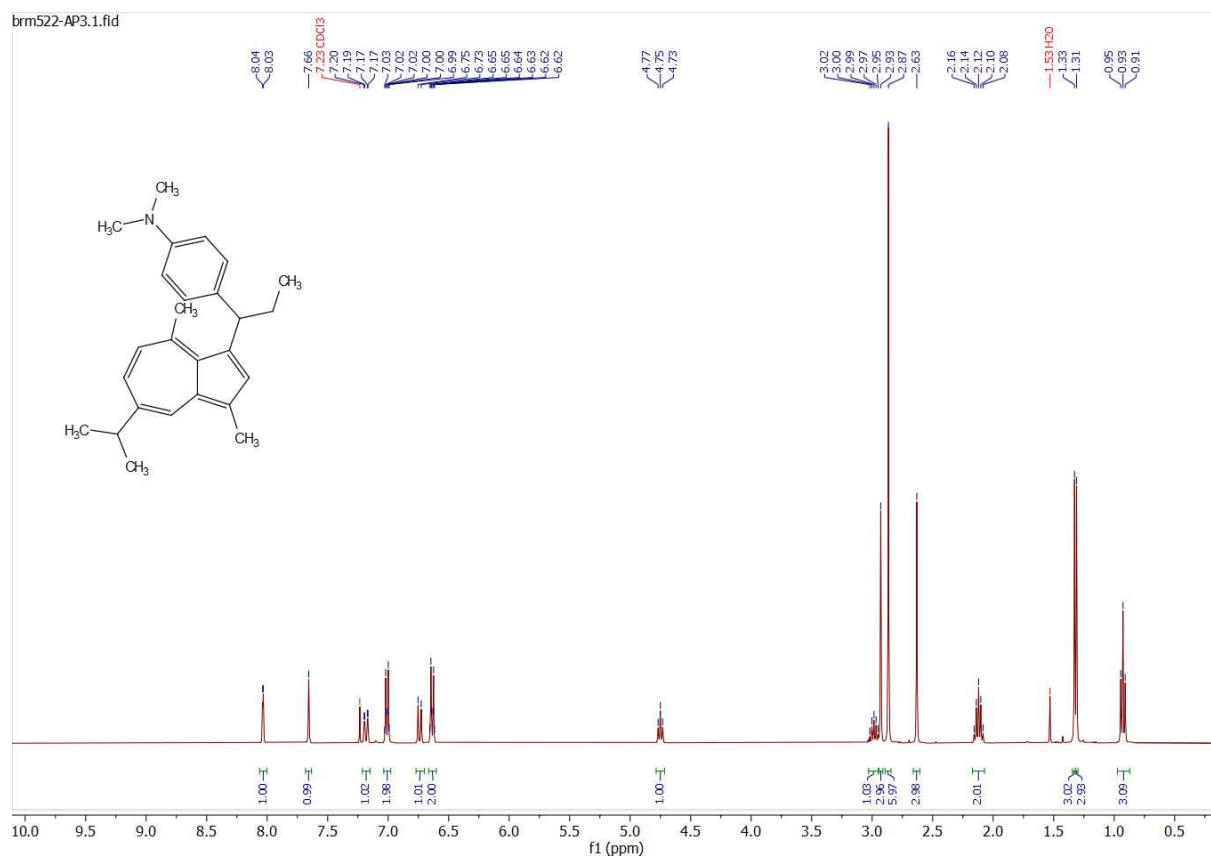

Figure S53.  $^1\text{H}$  NMR spectrum of compound **6c** (400 MHz,  $\text{CDCl}_3$ ).

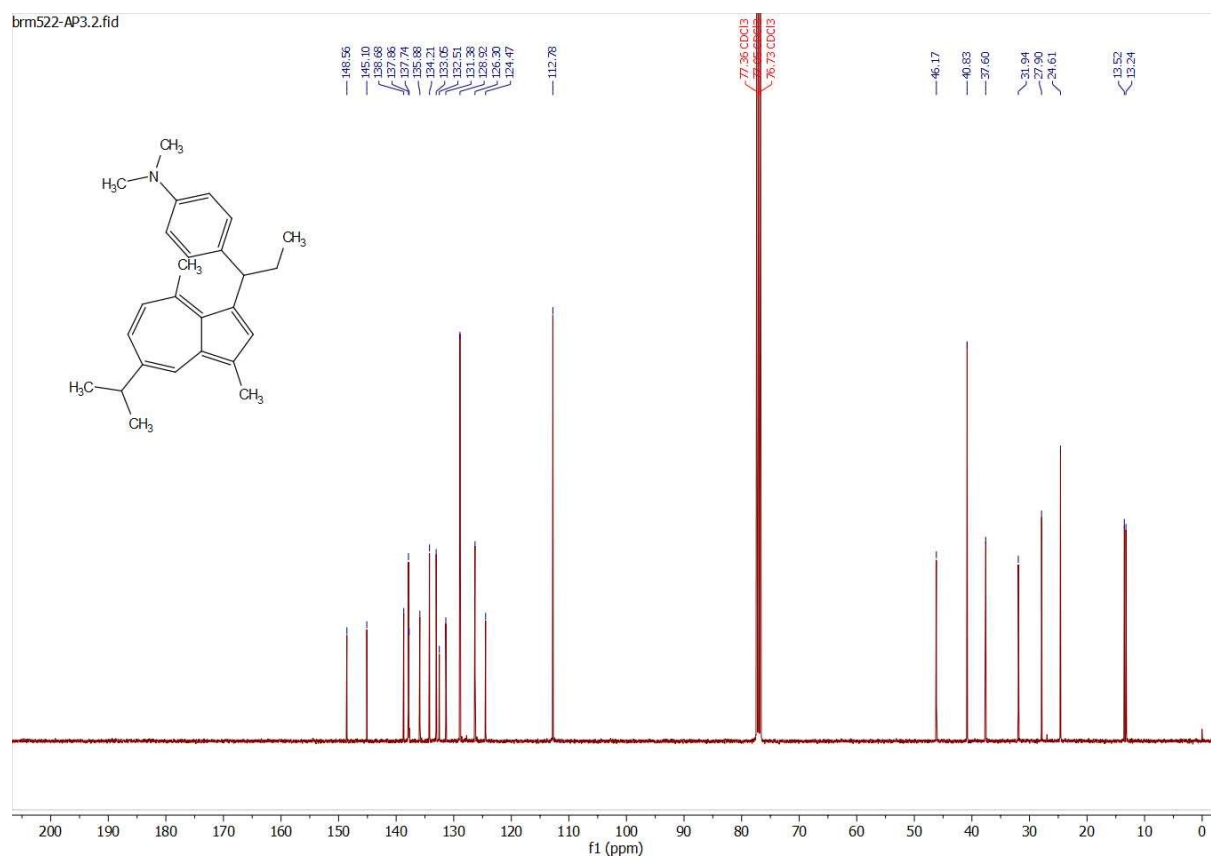

Figure S54.  $^{13}\text{C}$  NMR spectrum of compound **6c** (100 MHz,  $\text{CDCl}_3$ ).

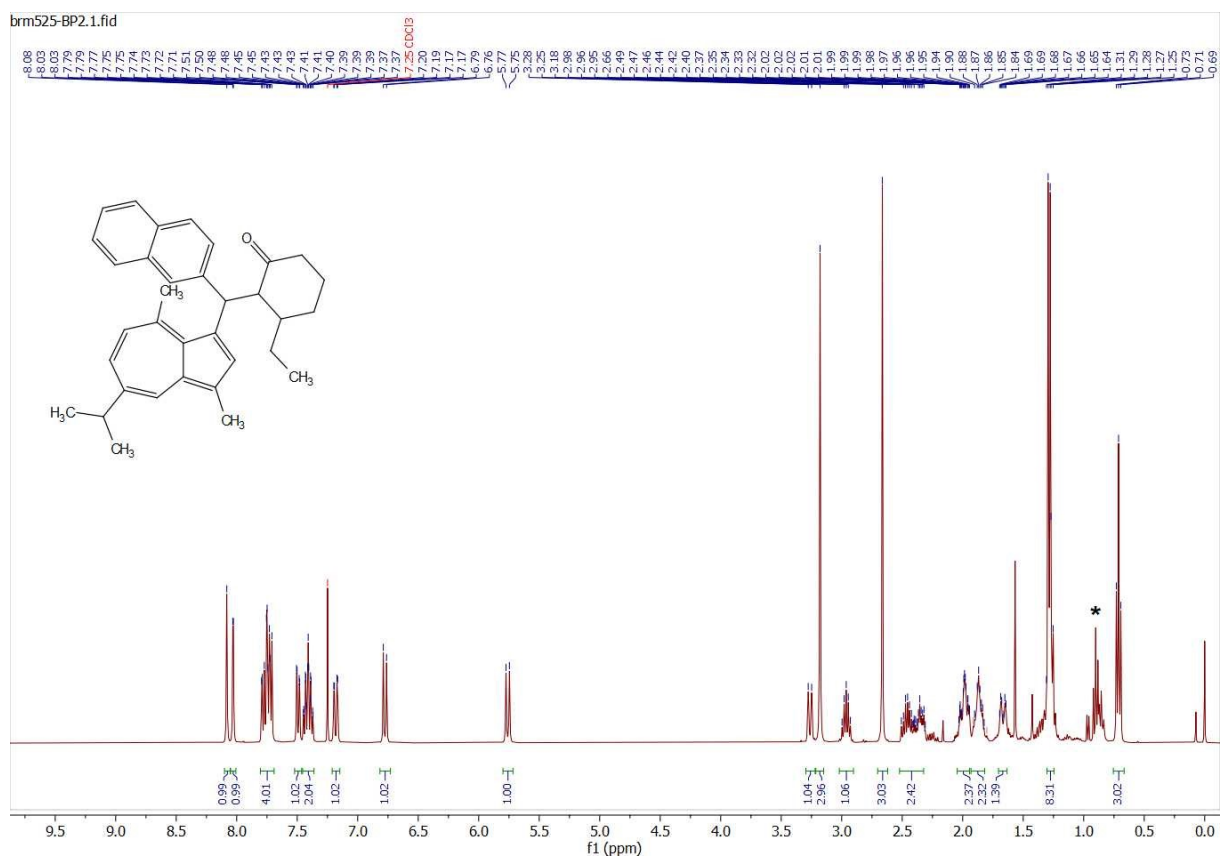

Figure S55.  $^1\text{H}$  NMR spectrum of compound **5ad/diastereomer 1** (400 MHz,  $\text{CDCl}_3$ ).

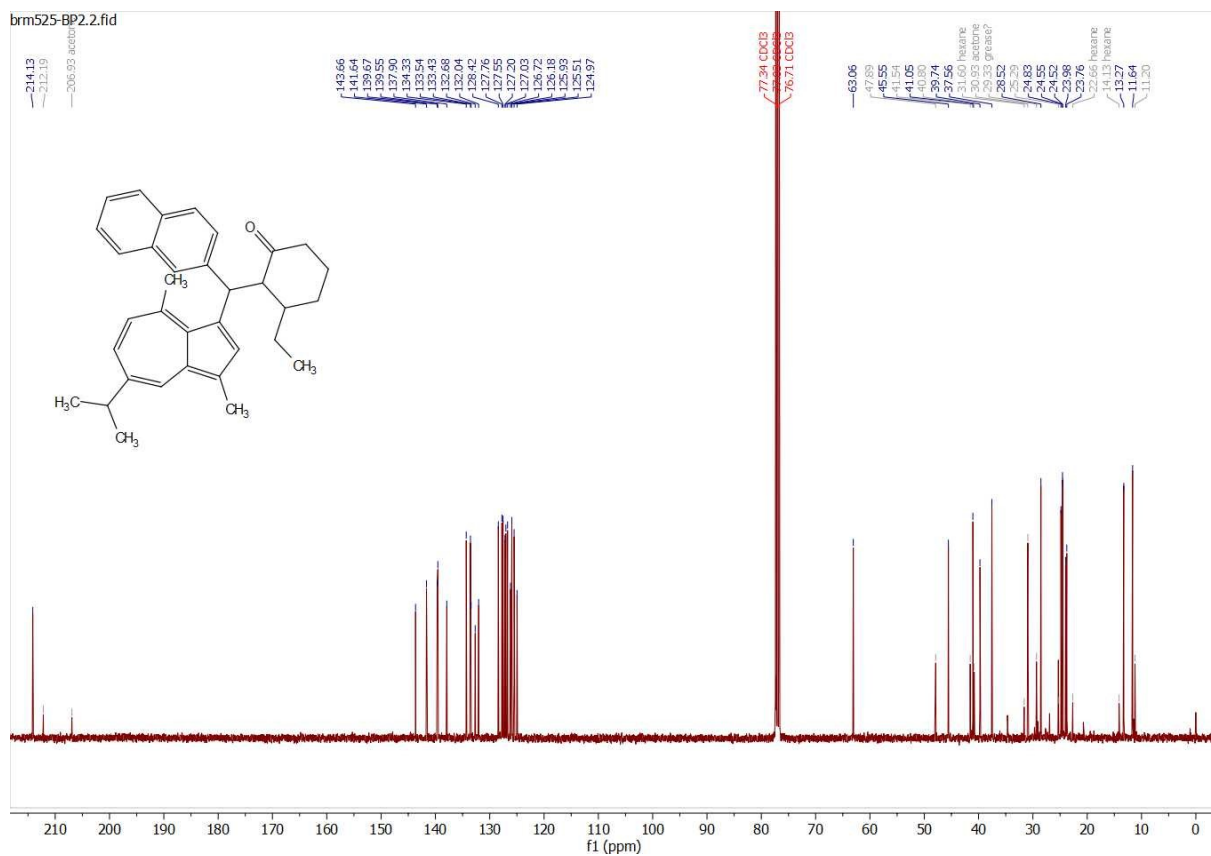

Figure S56.  $^{13}\text{C}$  NMR spectrum of compound **5ad/diastereomer 1** (100 MHz,  $\text{CDCl}_3$ ).

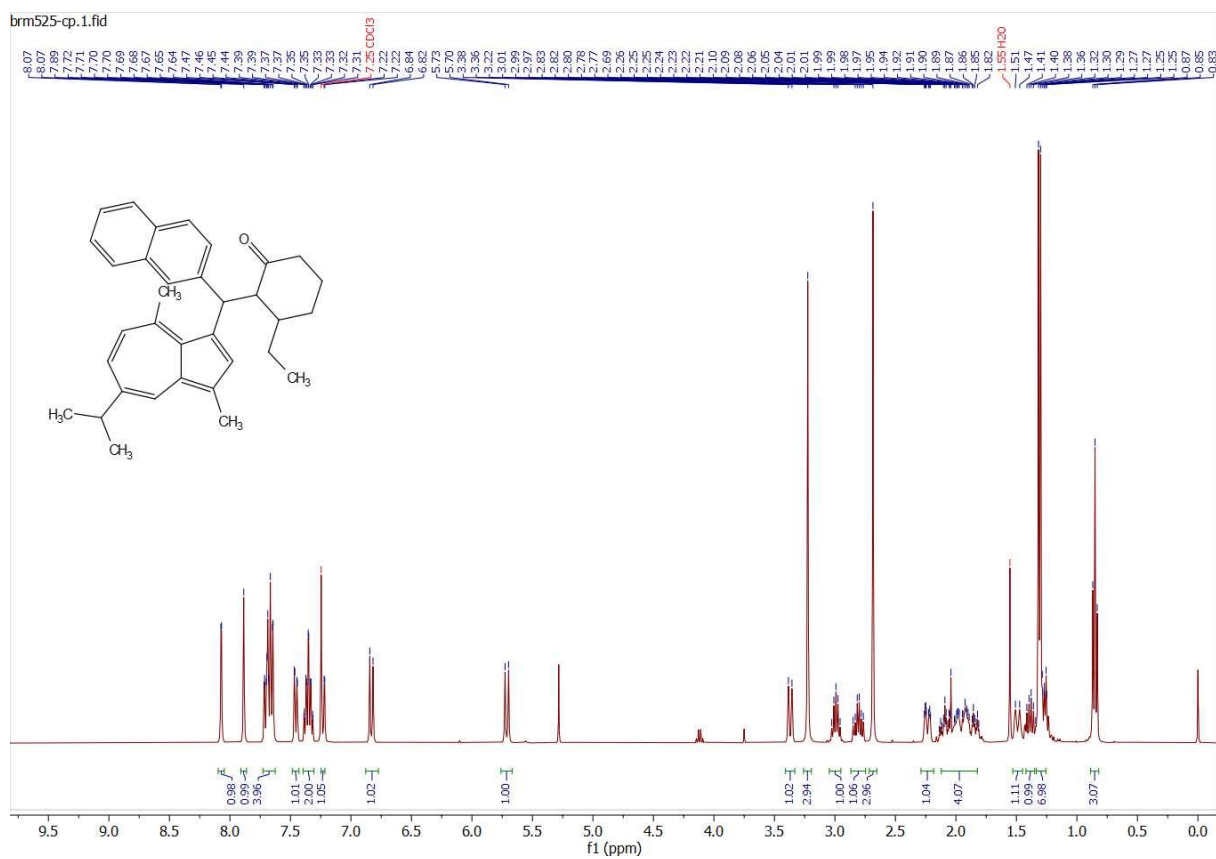

Figure S57.  $^1\text{H}$  NMR spectrum of compound **5ad/diastereomer 2** (400 MHz,  $\text{CDCl}_3$ ).

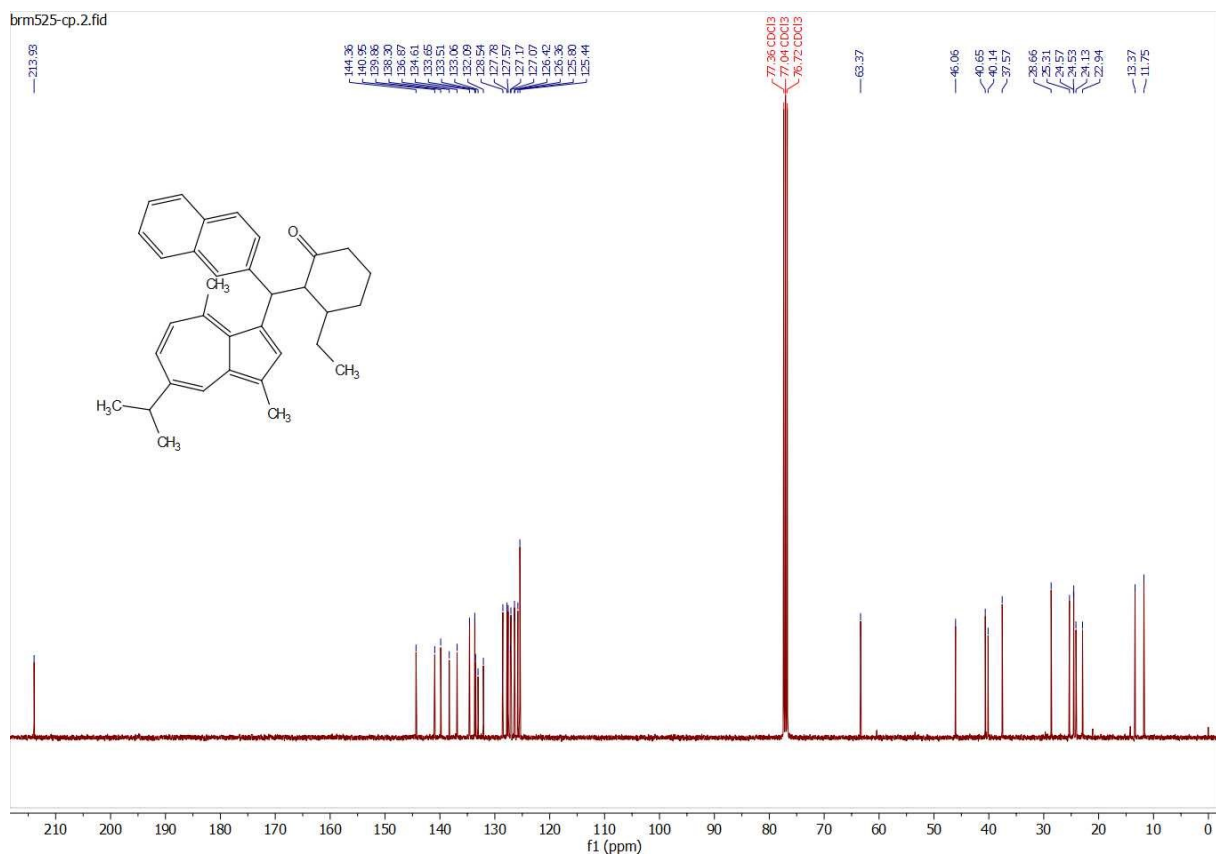

Figure S58.  $^{13}\text{C}$  NMR spectrum of compound **5ad/diastereomer 2** (100 MHz,  $\text{CDCl}_3$ ).

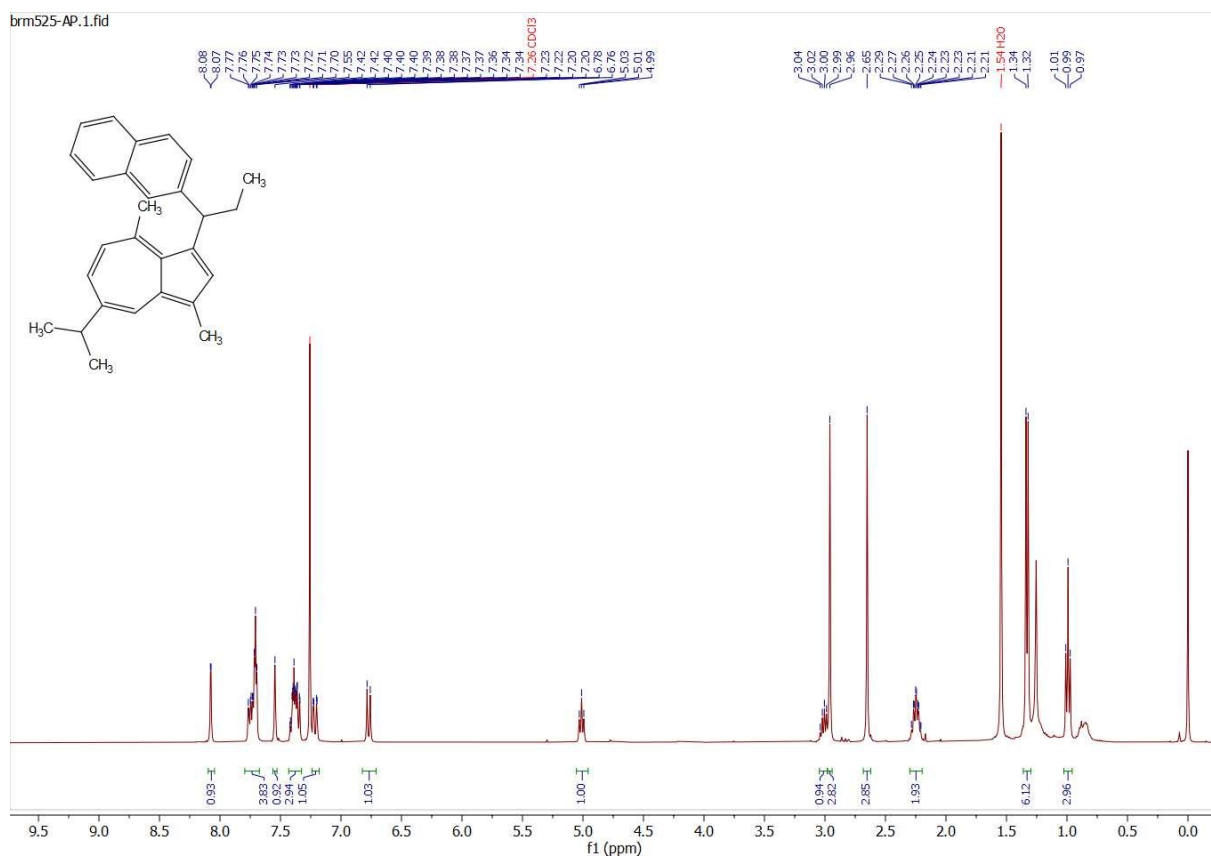

Figure S59.  $^1\text{H}$  NMR spectrum of compound **6d** (400 MHz,  $\text{CDCl}_3$ ).

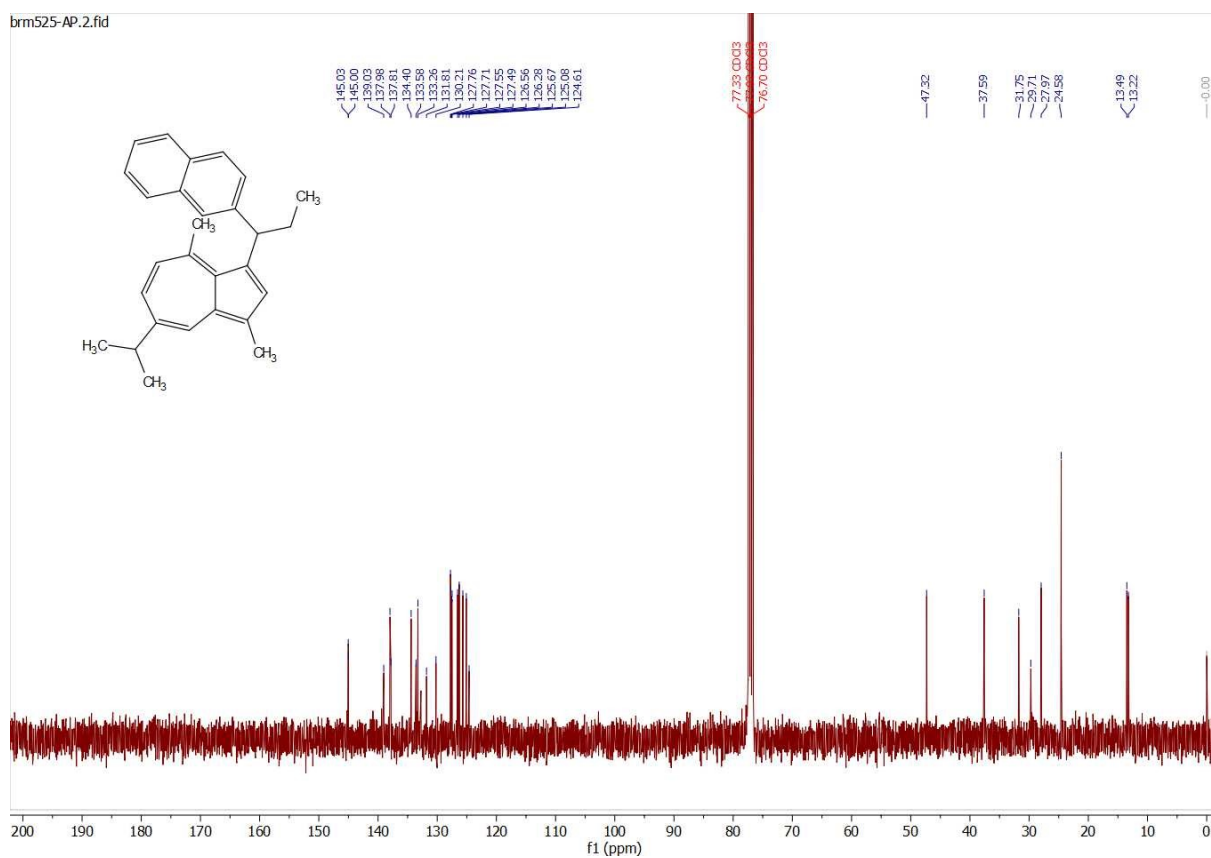

Figure S60.  $^{13}\text{C}$  NMR spectrum of compound **6d** (400 MHz,  $\text{CDCl}_3$ ).



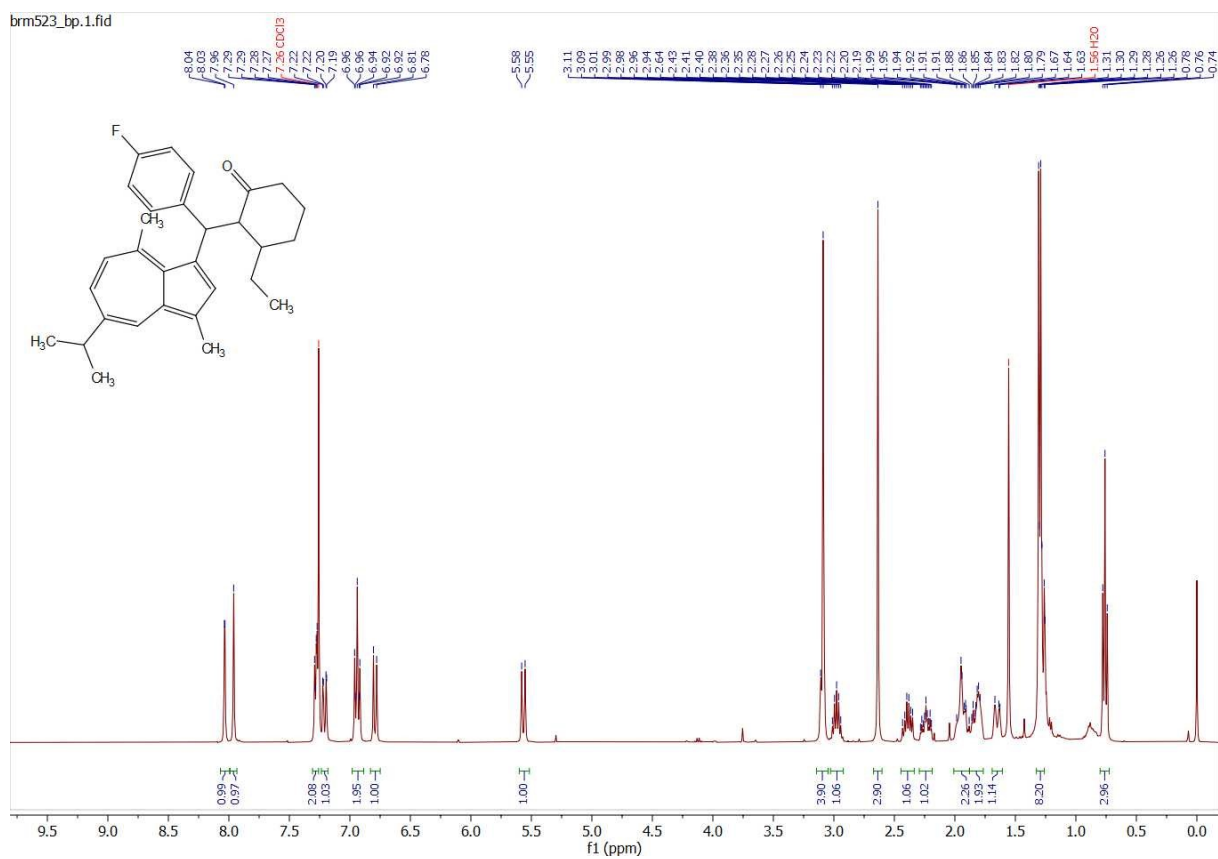

Figure S61.  $^1\text{H}$  NMR spectrum of compound **Sae/diastereomer 1** (400 MHz,  $\text{CDCl}_3$ ).

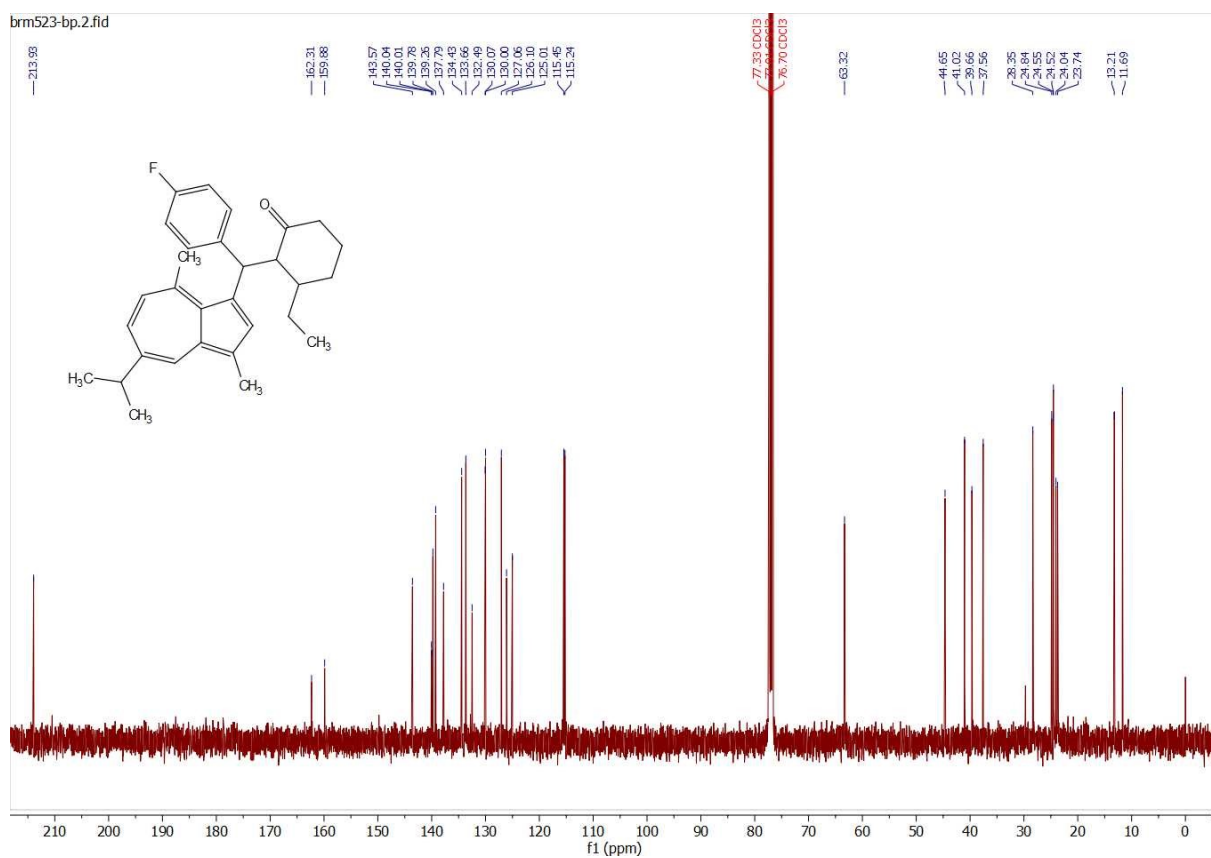

Figure S62.  $^{13}\text{C}$  NMR spectrum of compound **Sae/diastereomer 1** (100 MHz,  $\text{CDCl}_3$ ).

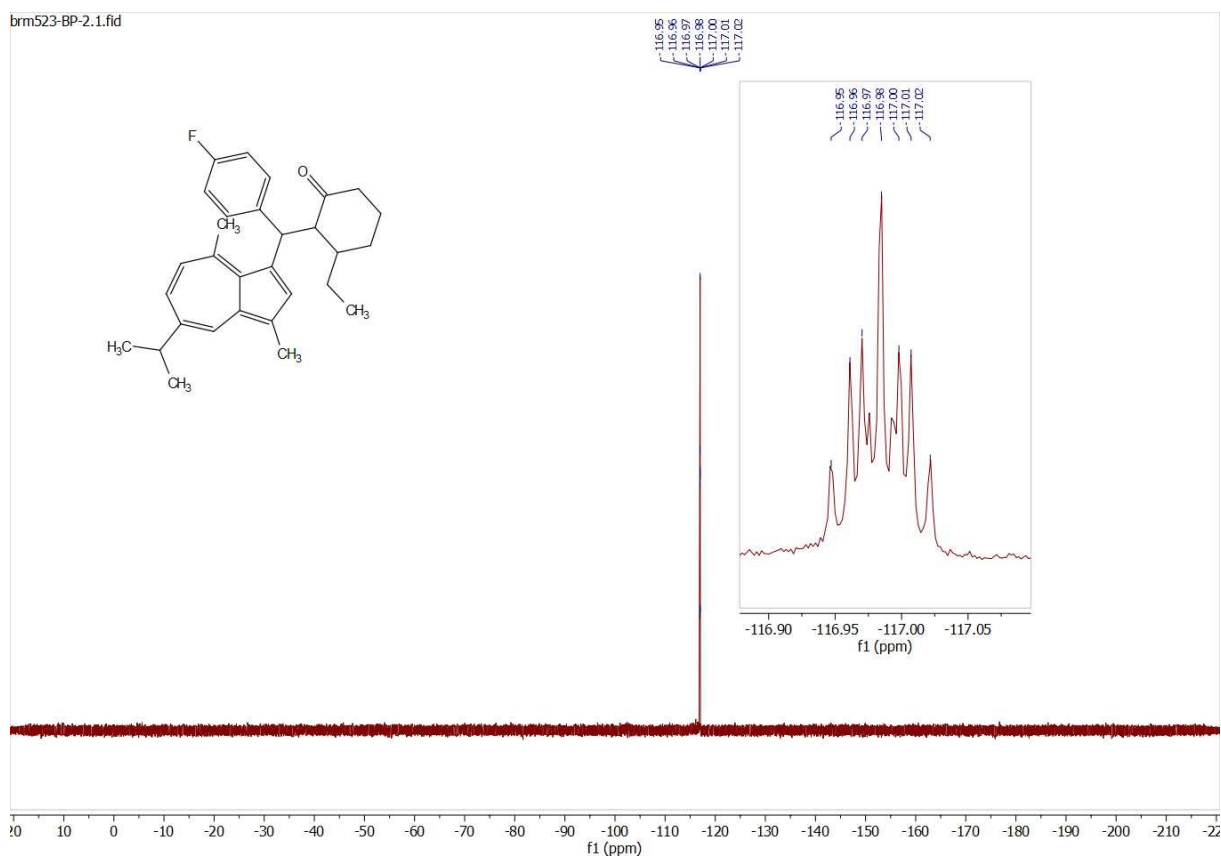

**Figure S63.**  $^{19}\text{F}$  NMR spectrum of compound **Sae/diastereomer 1** (376 MHz,  $\text{CDCl}_3$ ).

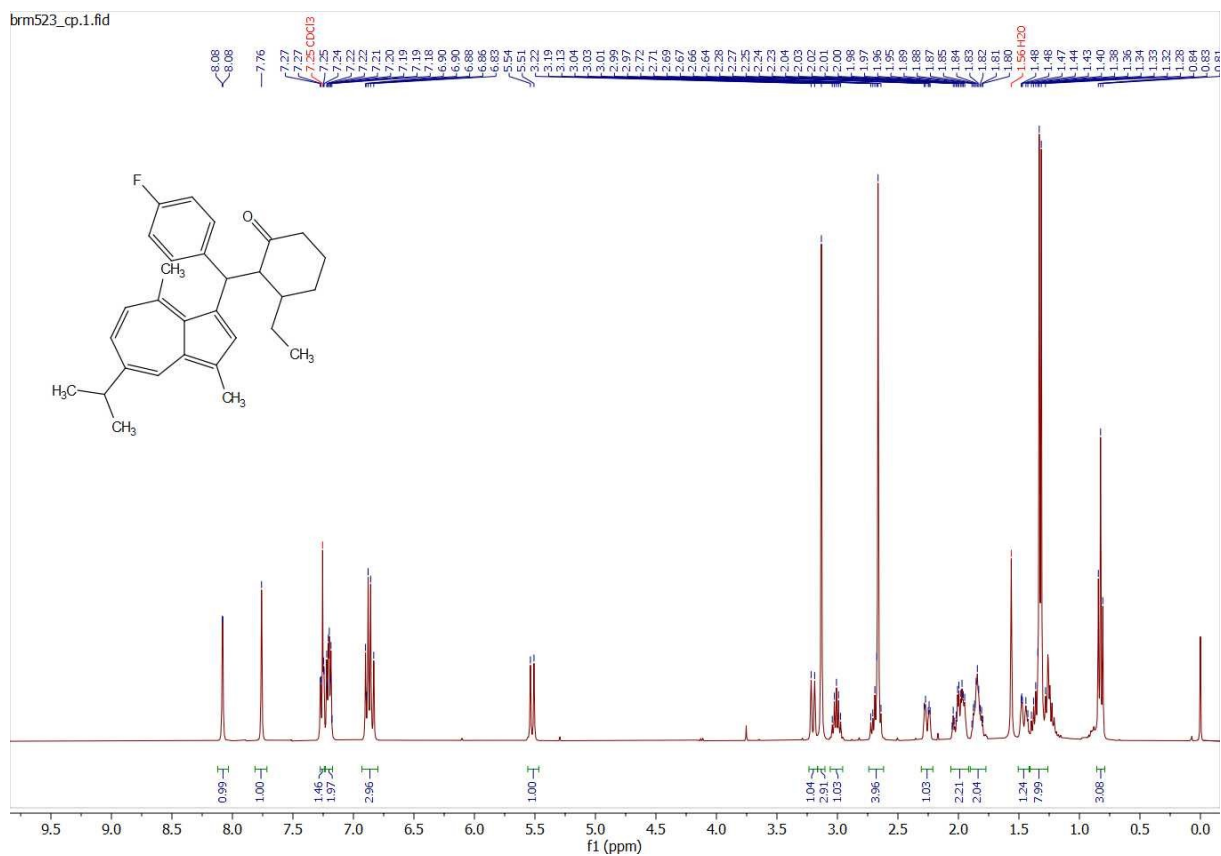

**Figure S64.**  $^1\text{H}$  NMR spectrum of compound **Sae/diastereomer 2** (400 MHz,  $\text{CDCl}_3$ ).

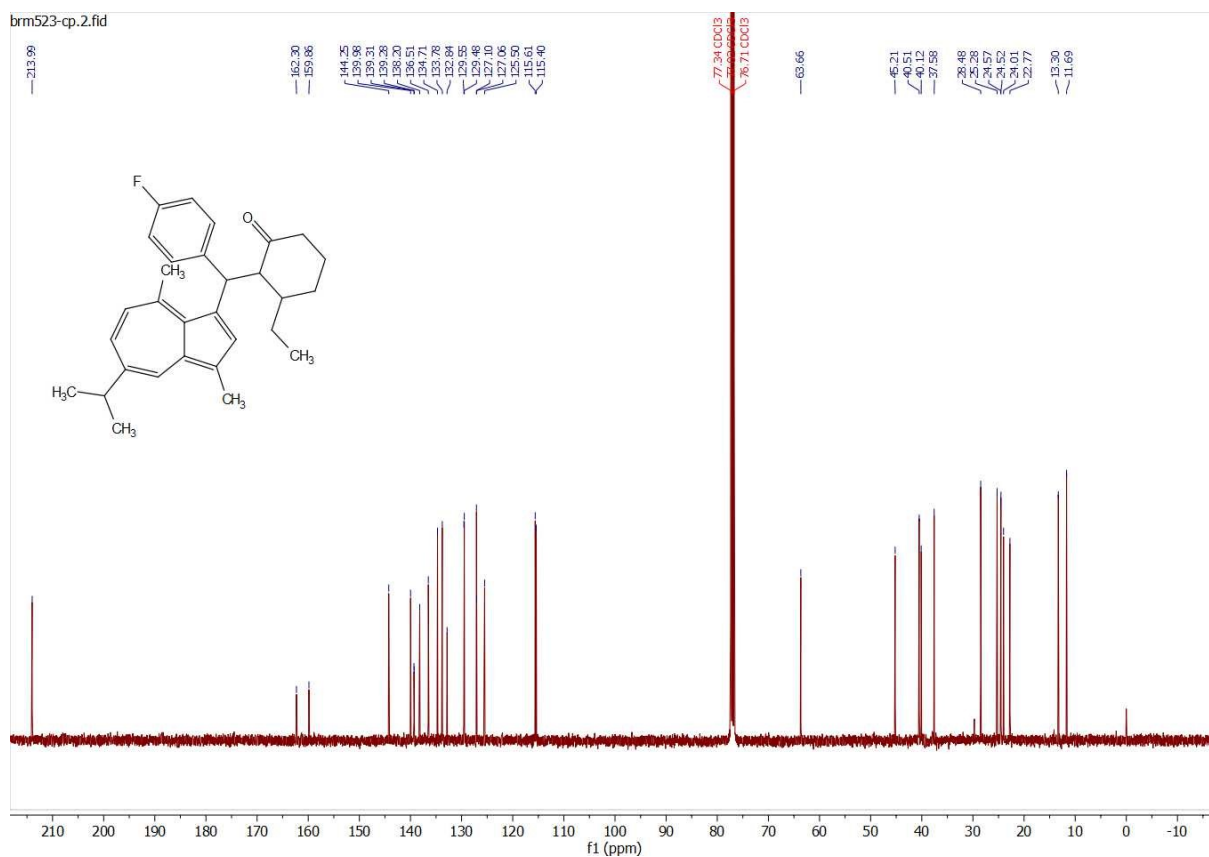

**Figure S65.** <sup>13</sup>C NMR spectrum of compound **5ae/diastereomer 2** (100 MHz, CDCl<sub>3</sub>).

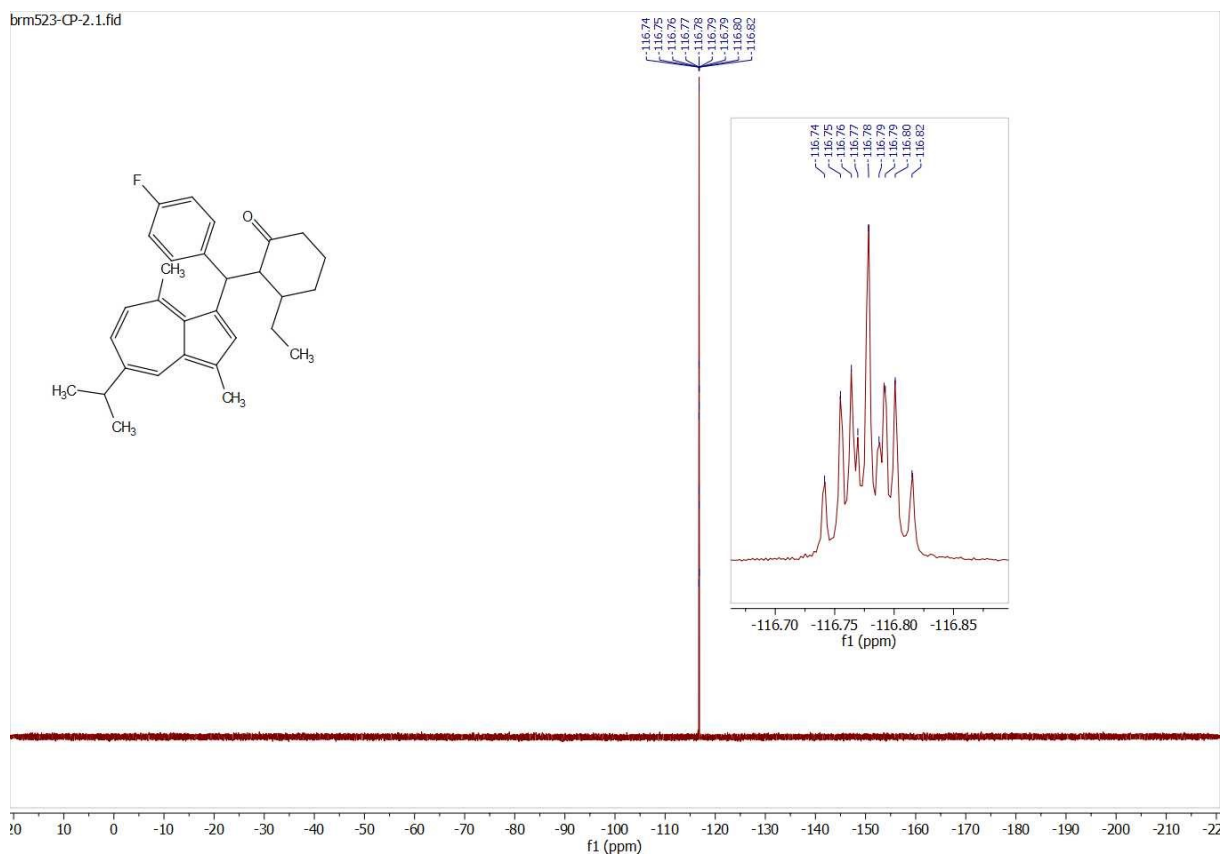

**Figure S66.** <sup>19</sup>F NMR spectrum of compound **5ae/diastereomer 2** (376 MHz, CDCl<sub>3</sub>).

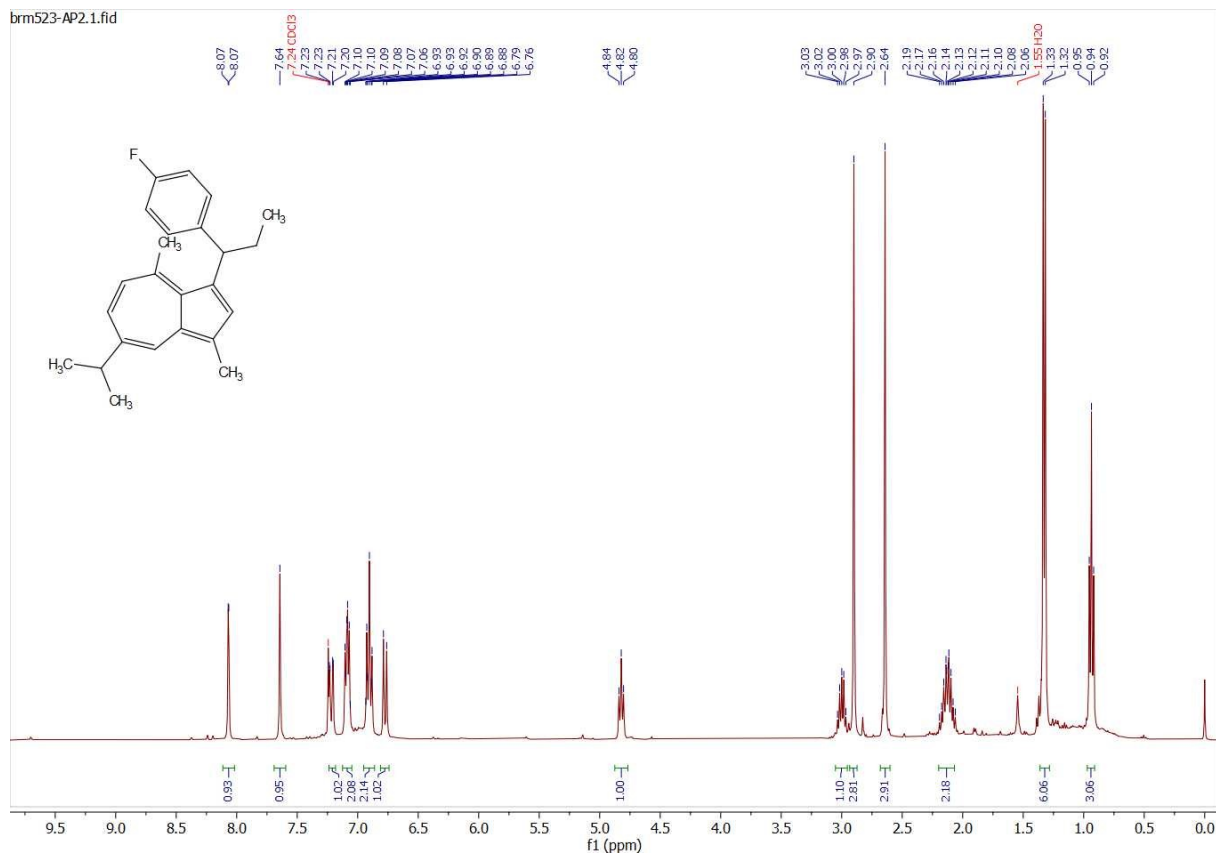

Figure S67.  $^1\text{H}$  NMR spectrum of compound **6e** (400 MHz,  $\text{CDCl}_3$ ).

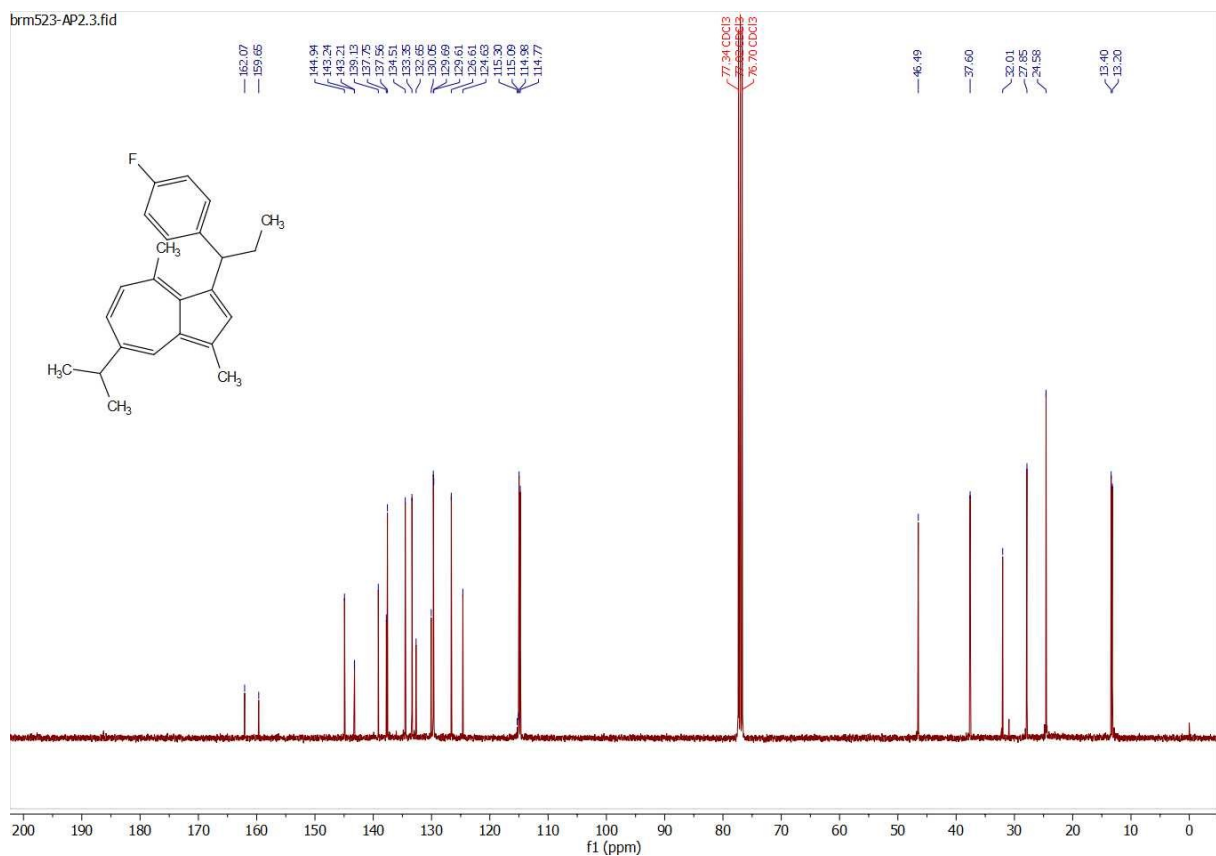

Figure S68.  $^{13}\text{C}$  NMR spectrum of compound **6e** (100 MHz,  $\text{CDCl}_3$ ).

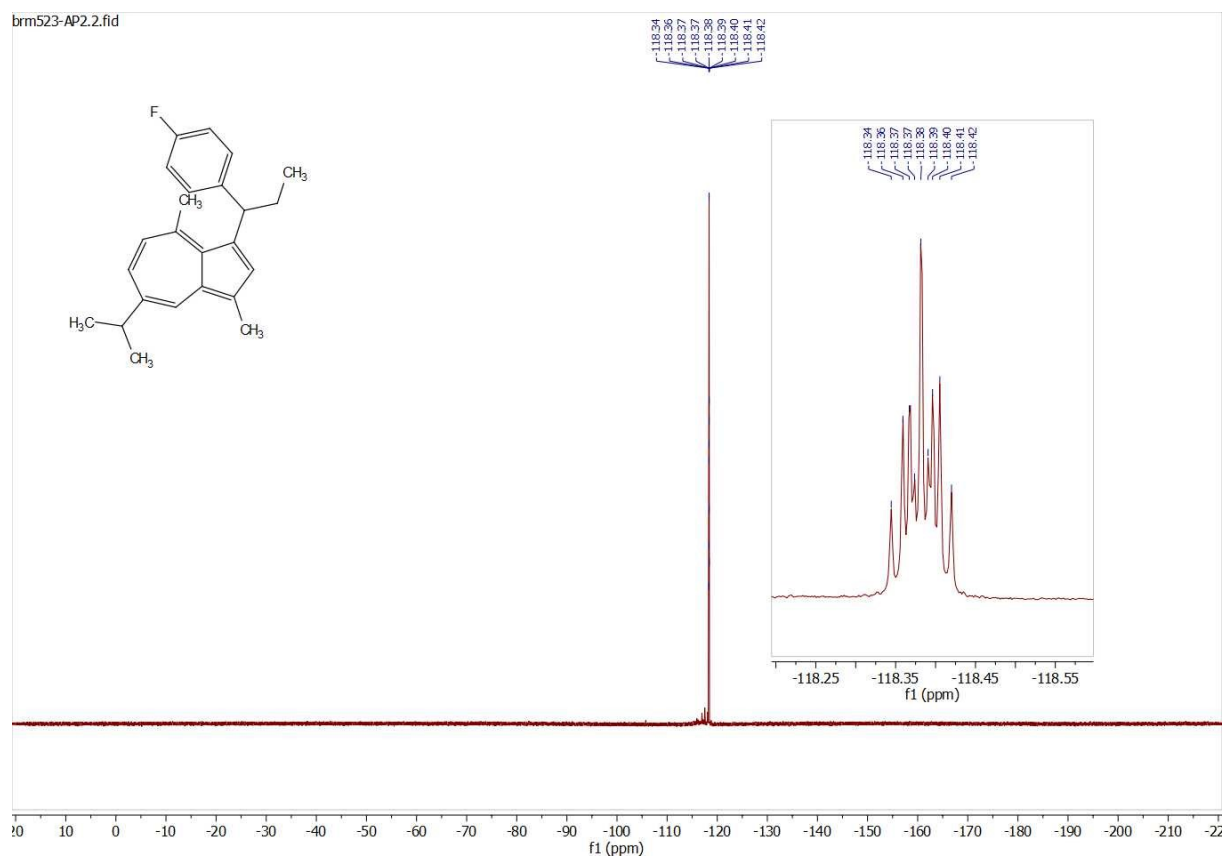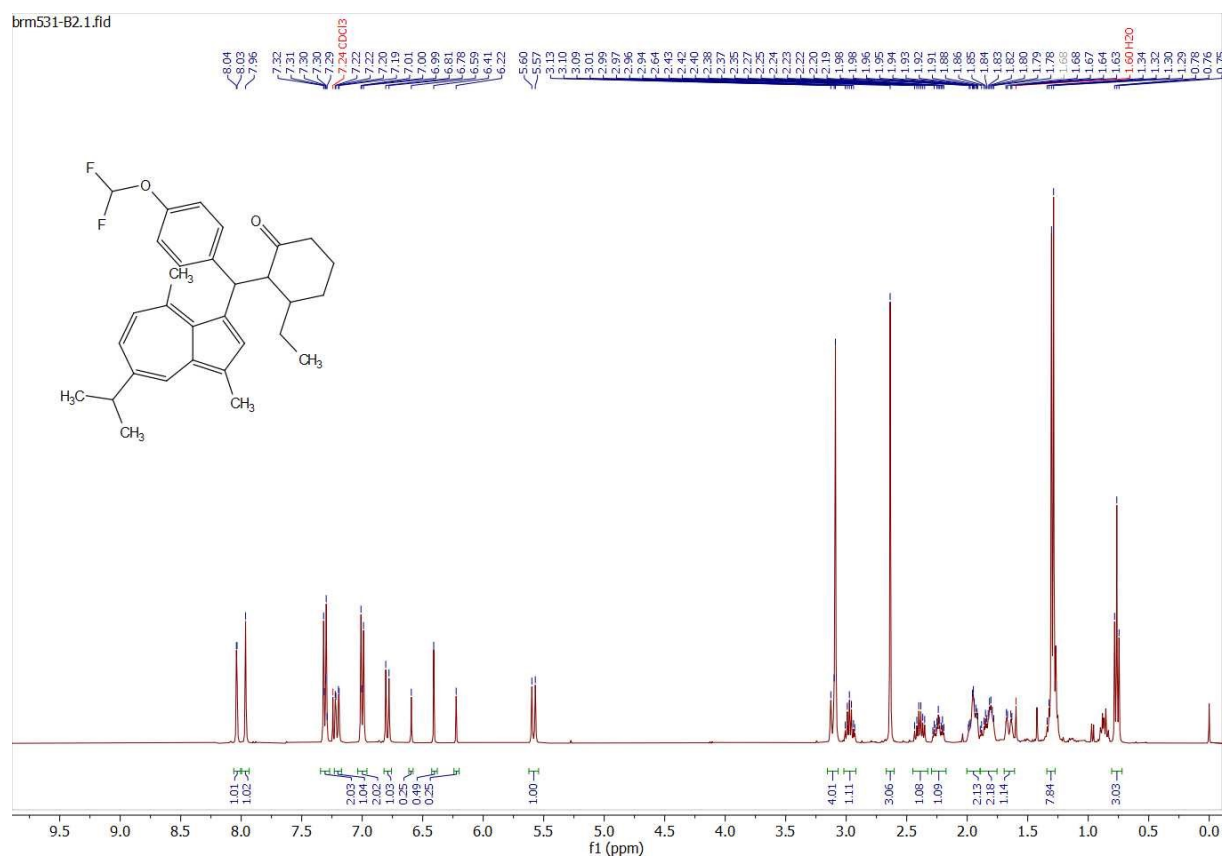

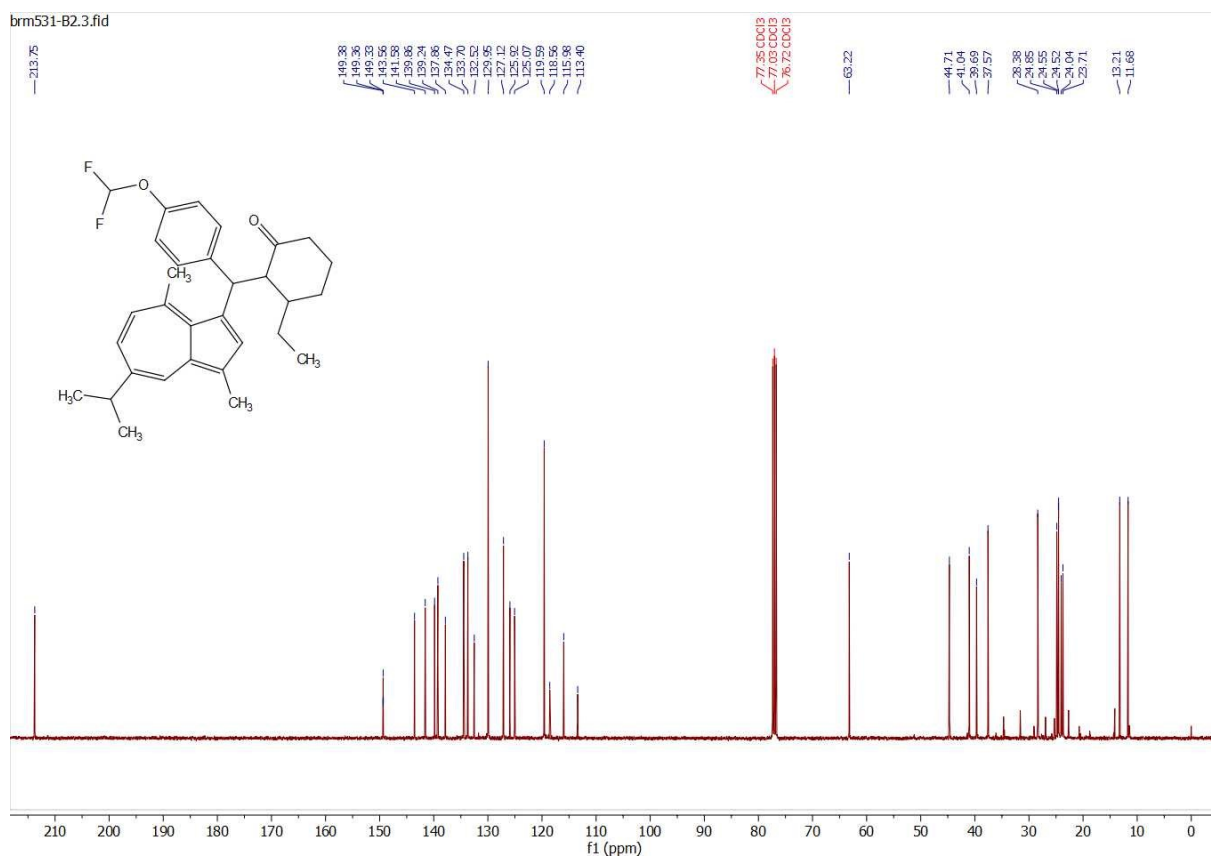

**Figure S71.** <sup>13</sup>C NMR spectrum of compound **Saf/diastereomer 1** (100 MHz, CDCl<sub>3</sub>).

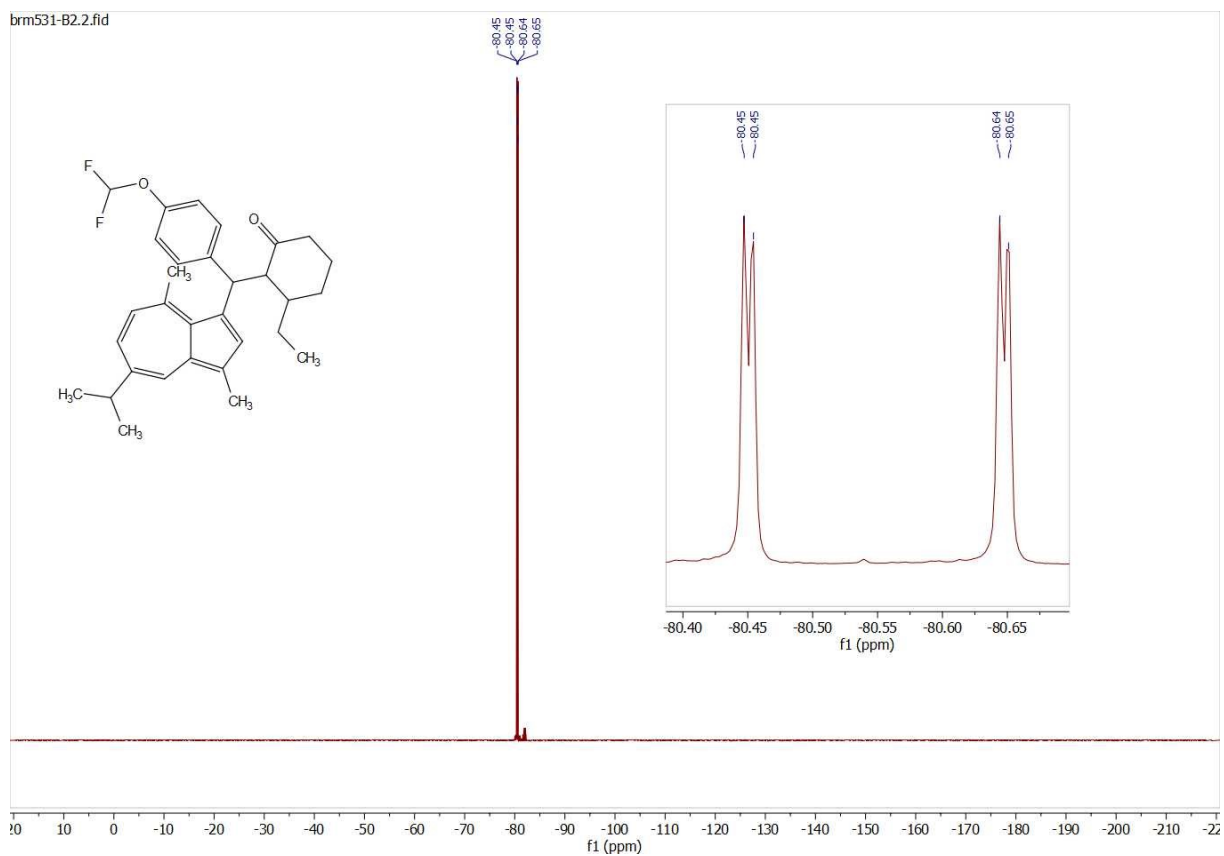

**Figure S72.** <sup>19</sup>F NMR spectrum of compound **Saf/diastereomer 1** (376 MHz, CDCl<sub>3</sub>).

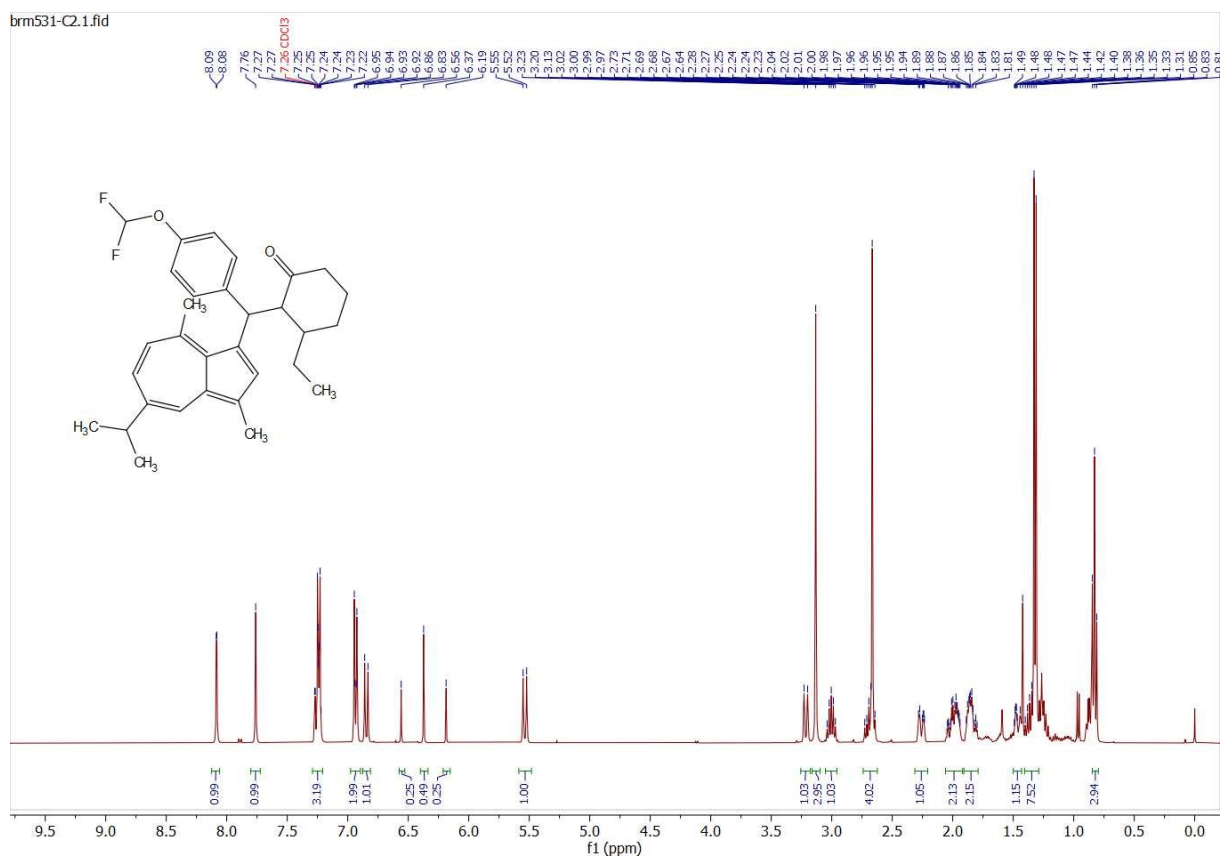

Figure S73.  $^1\text{H}$  NMR spectrum of compound **Saf/diastereomer 2** (400 MHz,  $\text{CDCl}_3$ ).

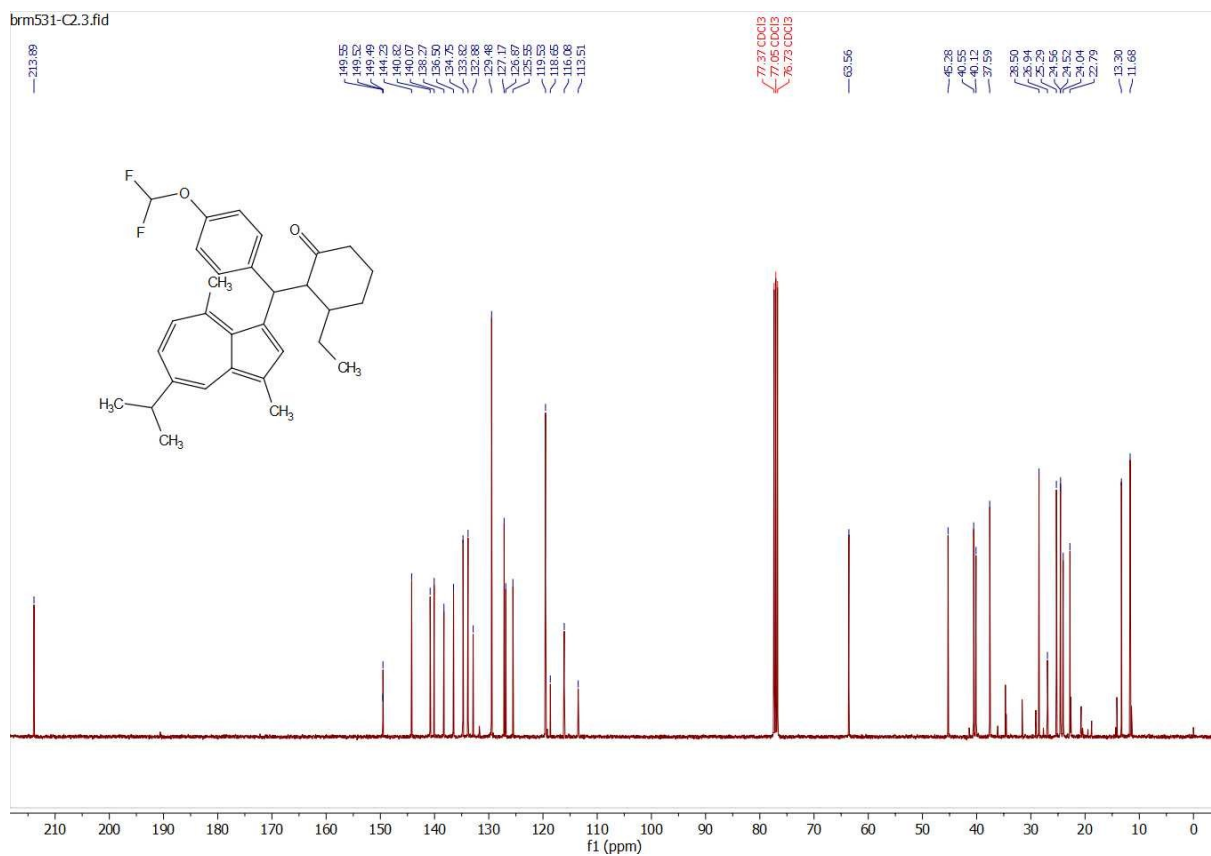

Figure S74.  $^{13}\text{C}$  NMR spectrum of compound **Saf/diastereomer 2** (100 MHz,  $\text{CDCl}_3$ ).



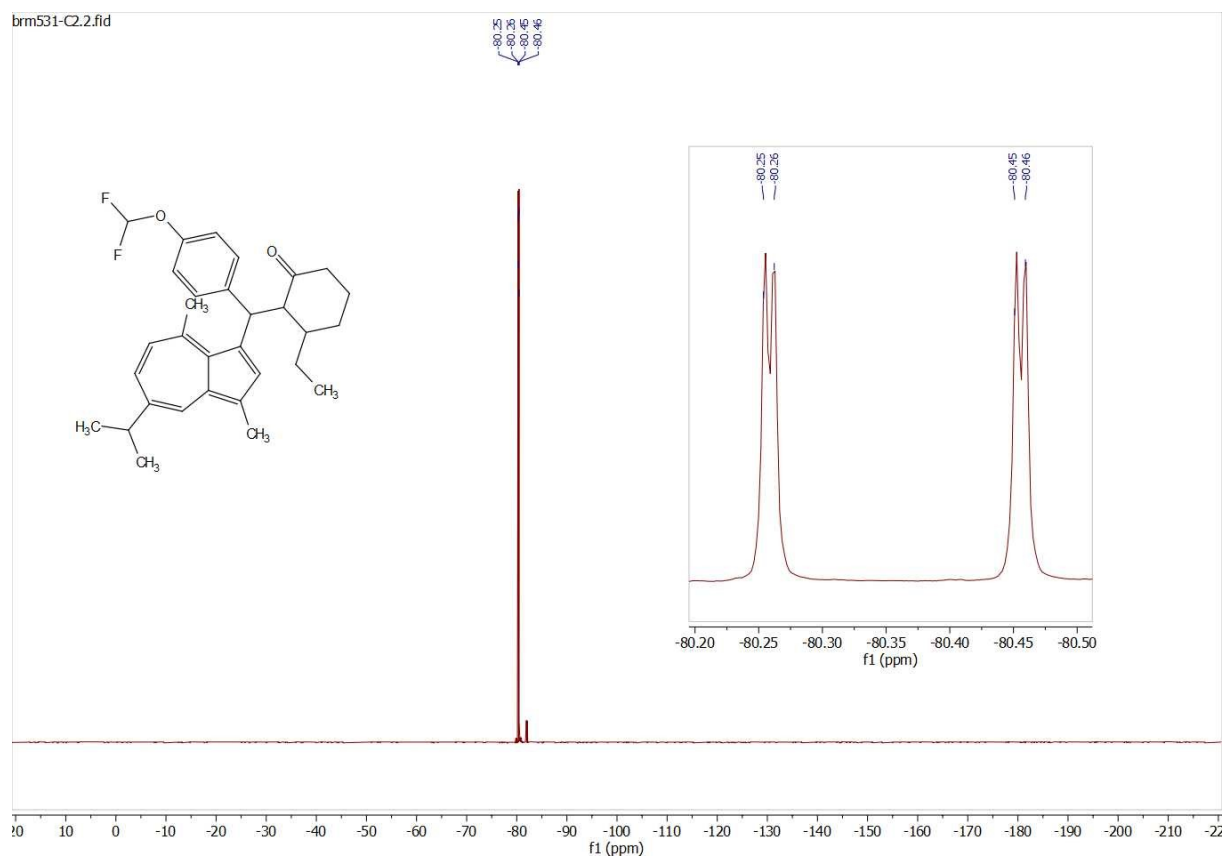

**Figure S75.**  $^{19}\text{F}$  NMR spectrum of compound **Saf/diastereomer 2** (376 MHz,  $\text{CDCl}_3$ ).

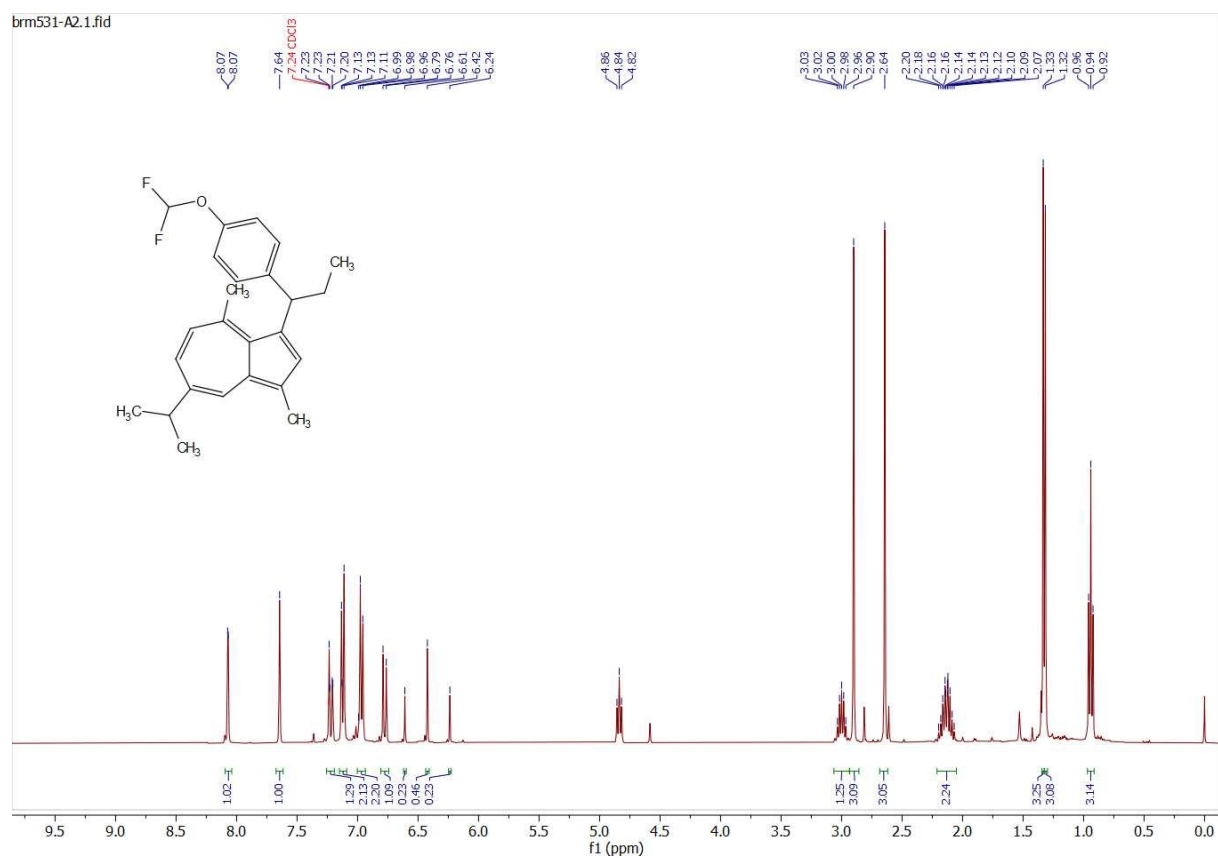

**Figure S76.**  $^1\text{H}$  NMR spectrum of compound **6f** (400 MHz,  $\text{CDCl}_3$ ).

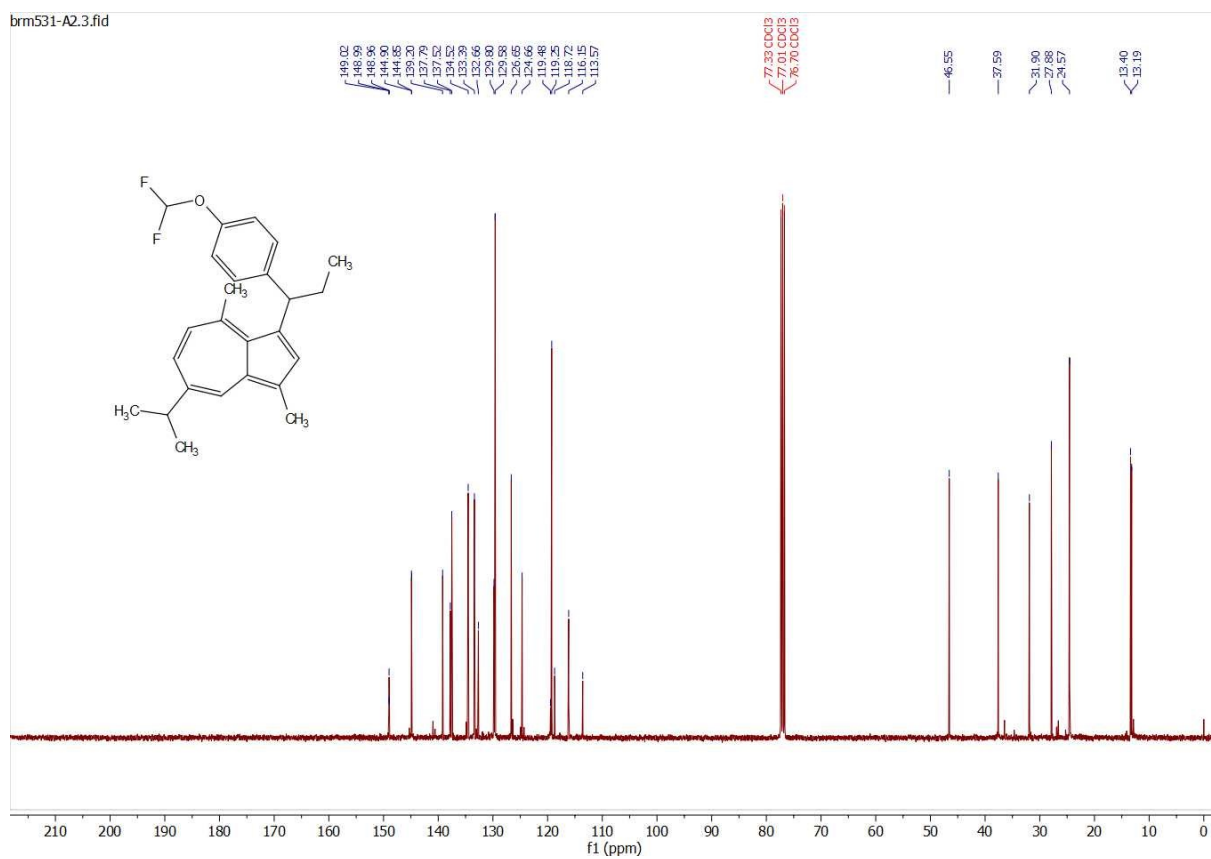

Figure S77.  $^{13}\text{C}$  NMR spectrum of compound **6f** (100 MHz,  $\text{CDCl}_3$ ).

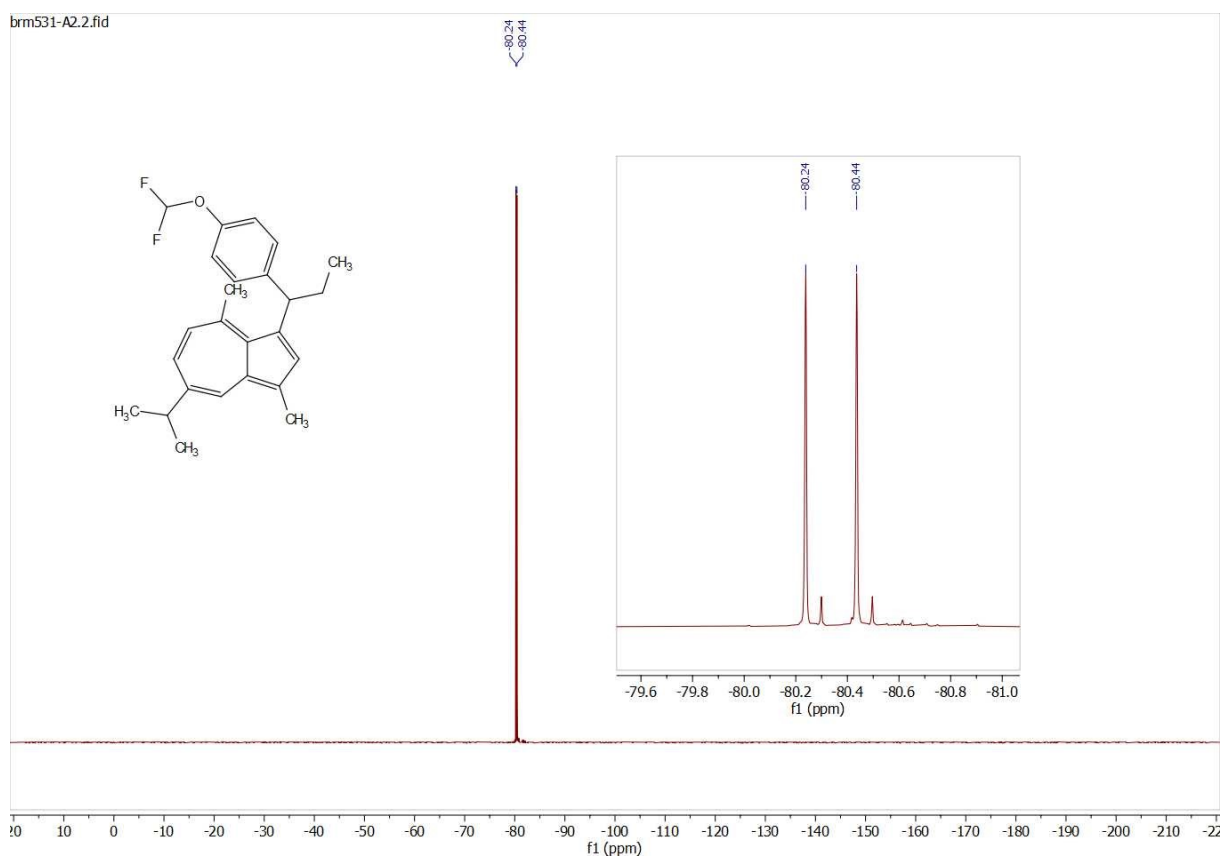

Figure S78.  $^{19}\text{F}$  NMR spectrum of compound **6f** (376 MHz,  $\text{CDCl}_3$ ).

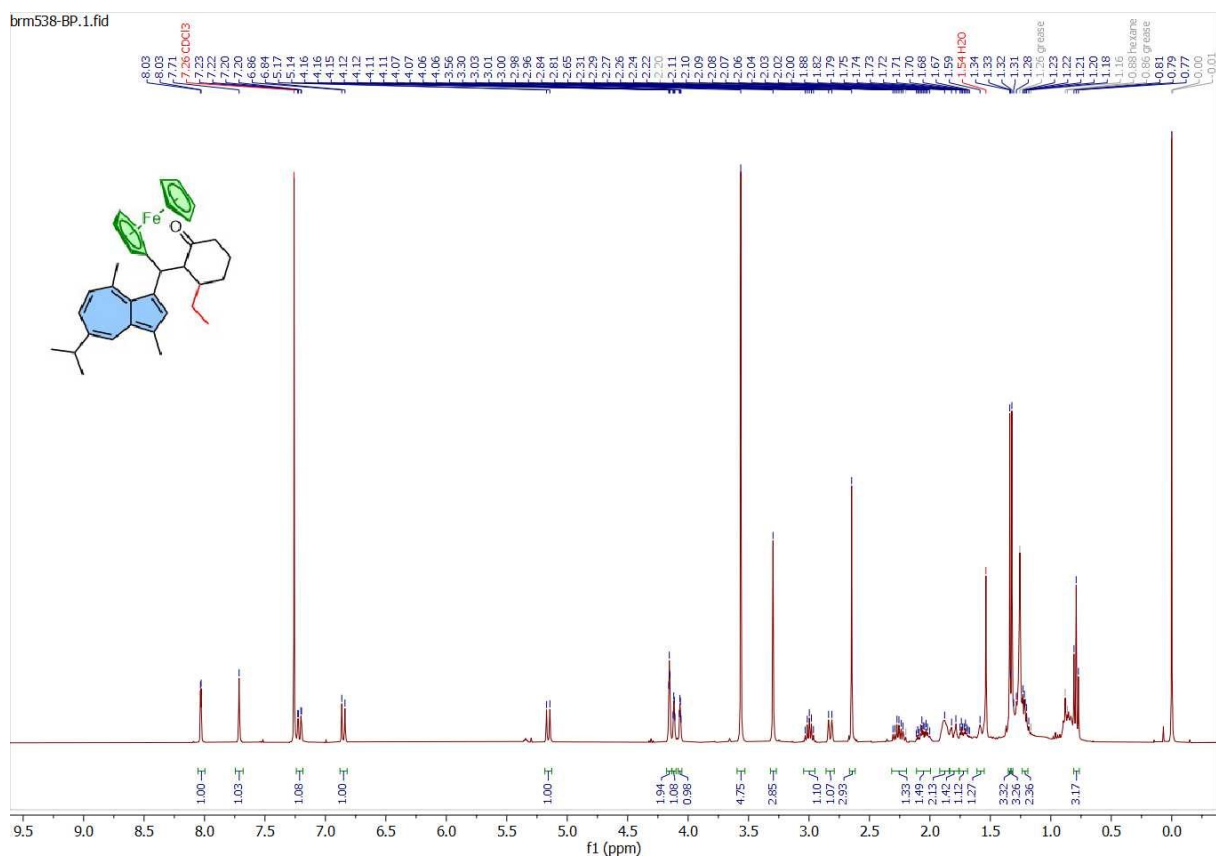

Figure S79.  $^1\text{H}$  NMR spectrum of compound **5ag/diastereomer 1** (400 MHz,  $\text{CDCl}_3$ ).

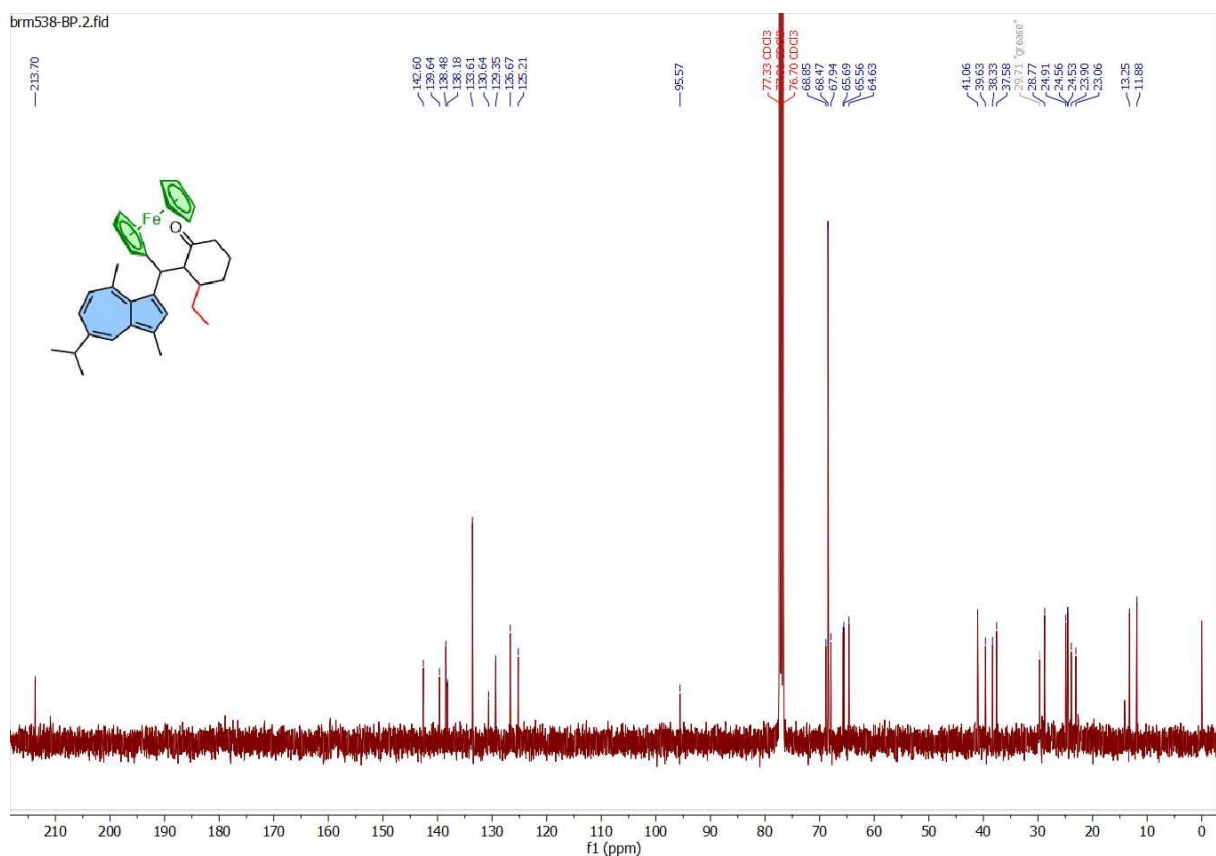

Figure S80.  $^{13}\text{C}$  NMR spectrum of compound **5ag/diastereomer 1** (100 MHz,  $\text{CDCl}_3$ ).



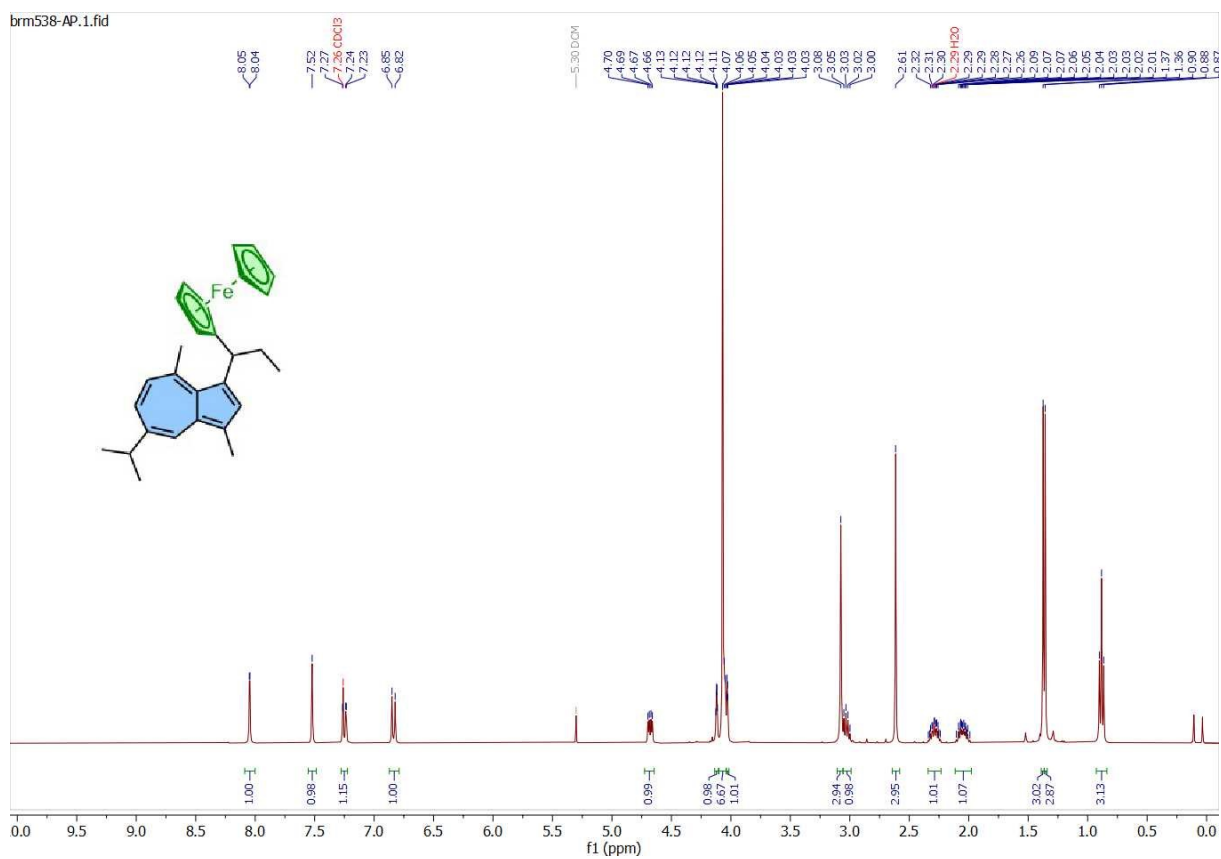

Figure S83.  $^1\text{H}$  NMR spectrum of compound **6g** (400 MHz,  $\text{CDCl}_3$ ).

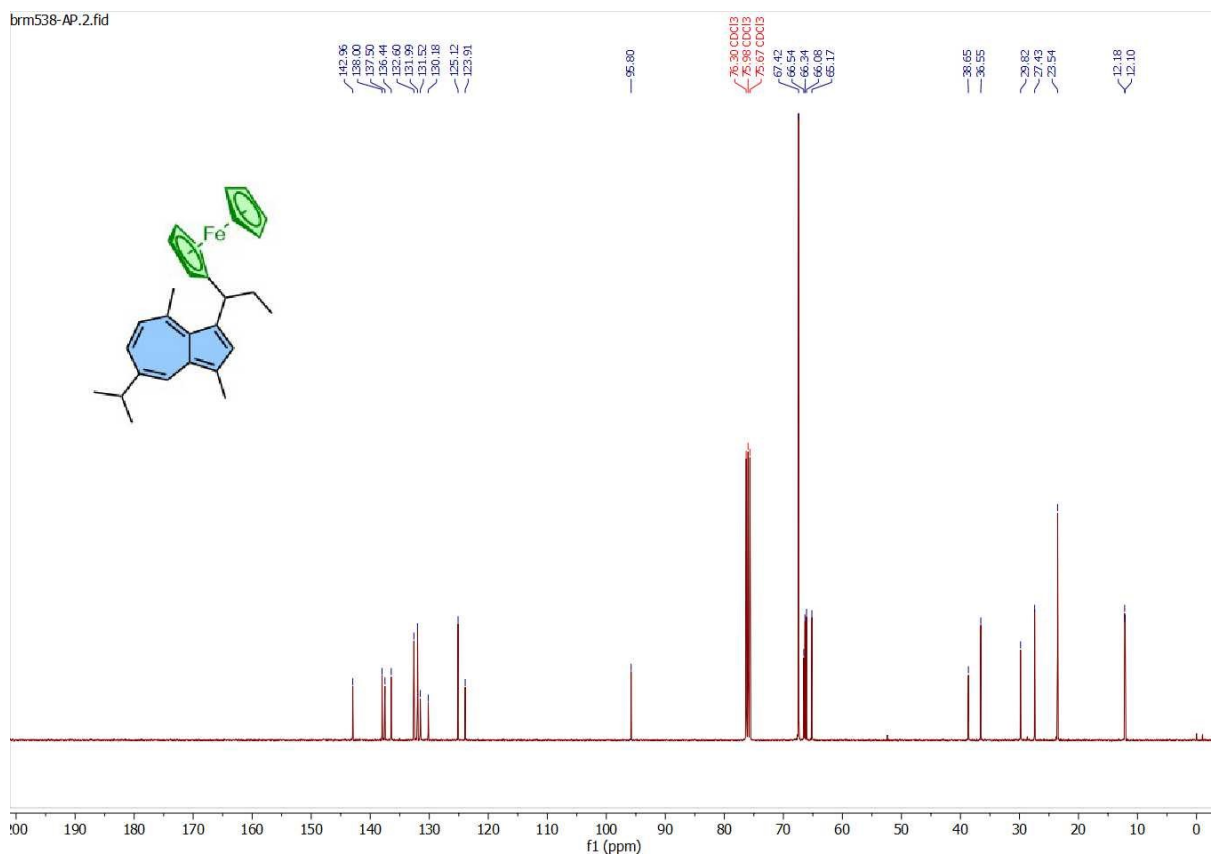

Figure S84.  $^{13}\text{C}$  NMR spectrum of compound **6g** (100 MHz,  $\text{CDCl}_3$ ).

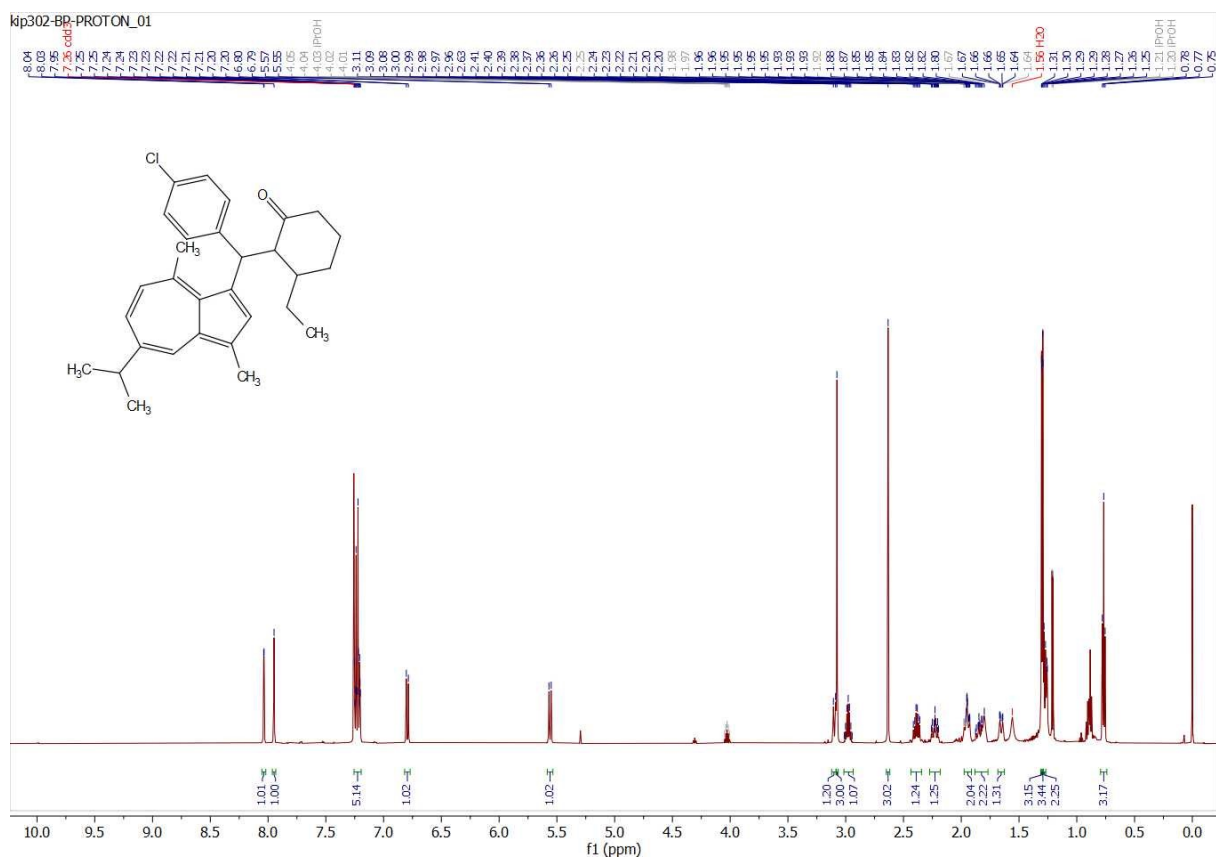

Figure S85.  $^1\text{H}$  NMR spectrum of compound **5ah/diastereomer 1** (600 MHz,  $\text{CDCl}_3$ ).

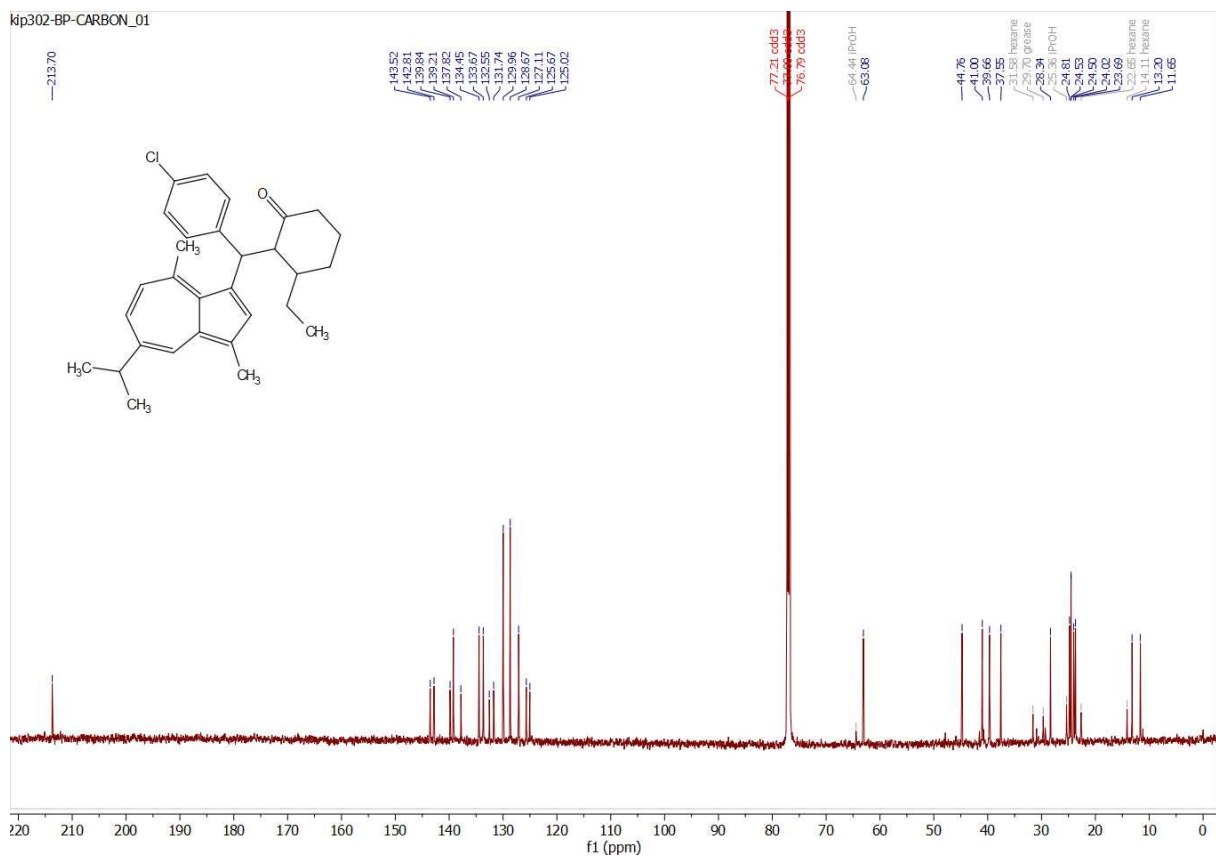

Figure S86.  $^{13}\text{C}$  NMR spectrum of compound **5ah/diastereomer 1** (150 MHz,  $\text{CDCl}_3$ ).

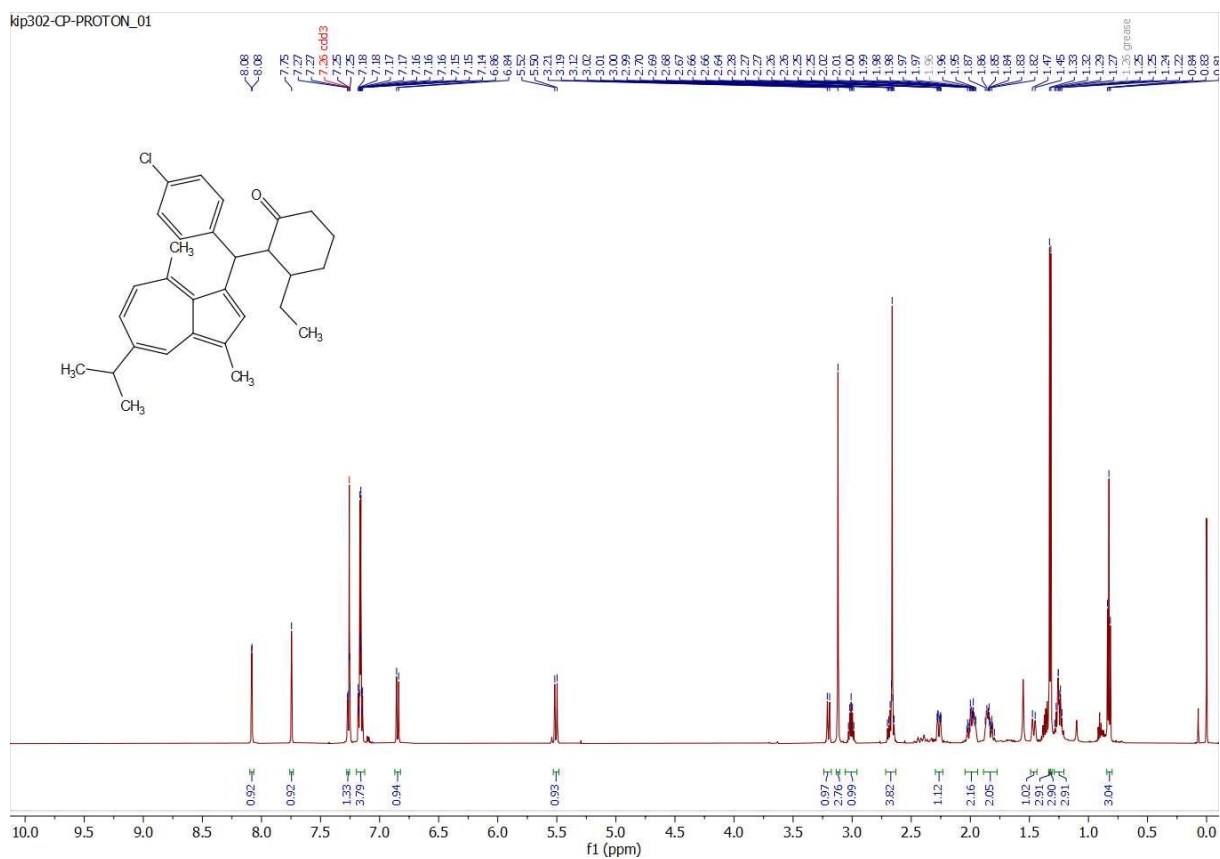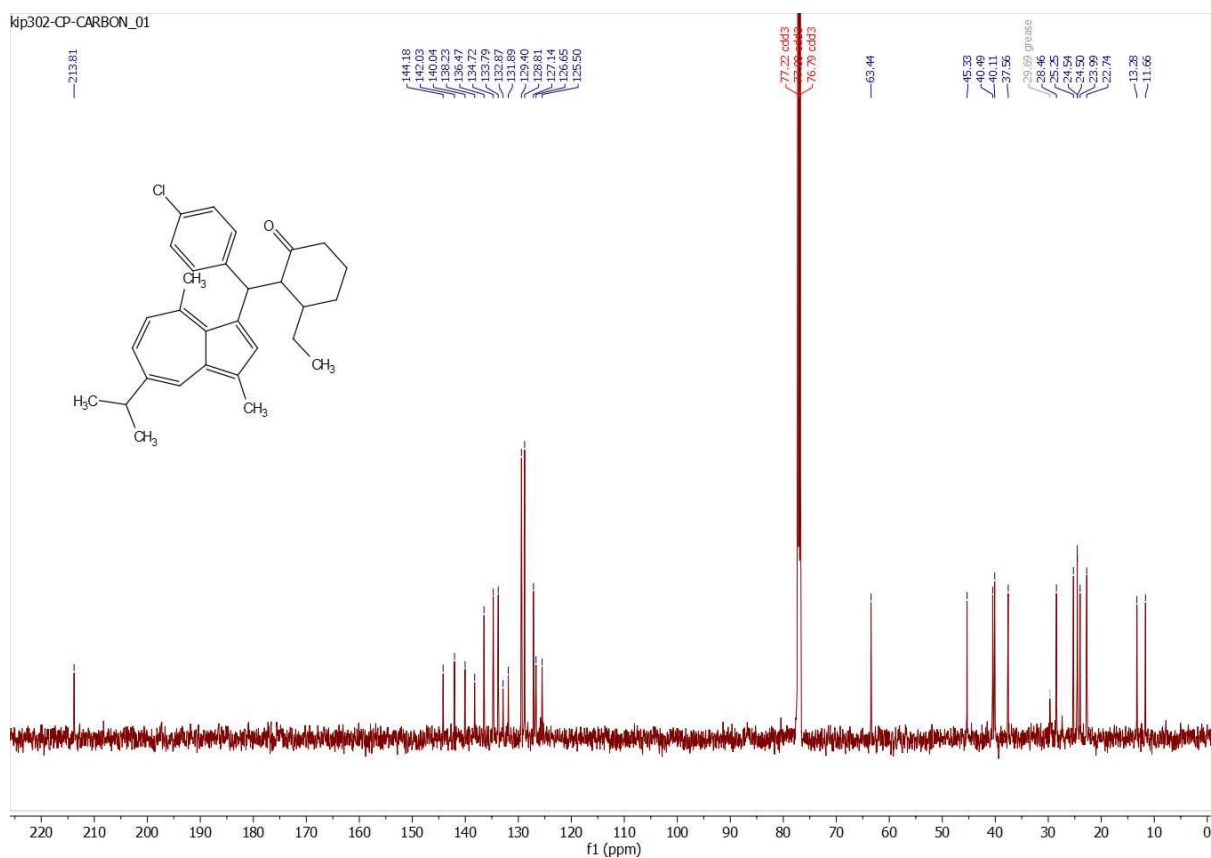

















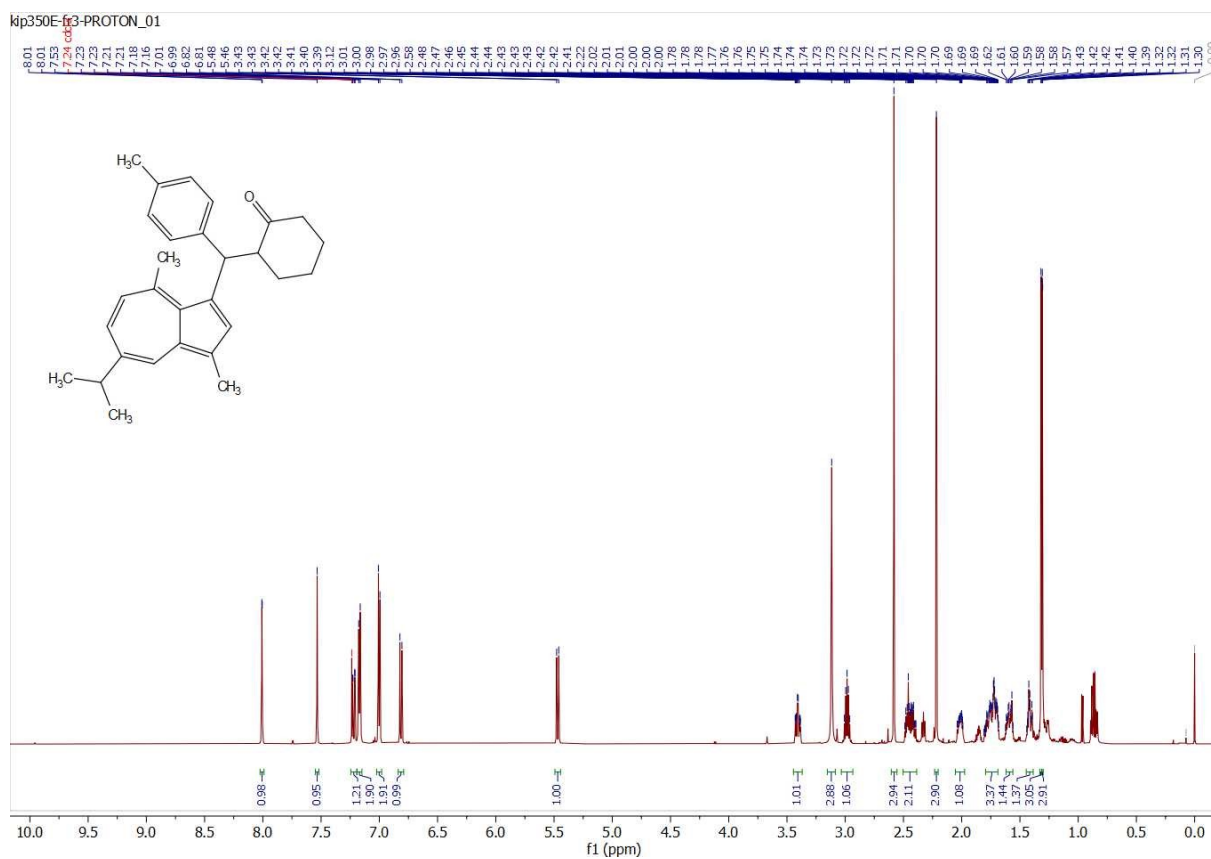

Figure S101.  $^1\text{H}$  NMR spectrum of compound **7a/diastereomer 2** (600 MHz,  $\text{CDCl}_3$ ).

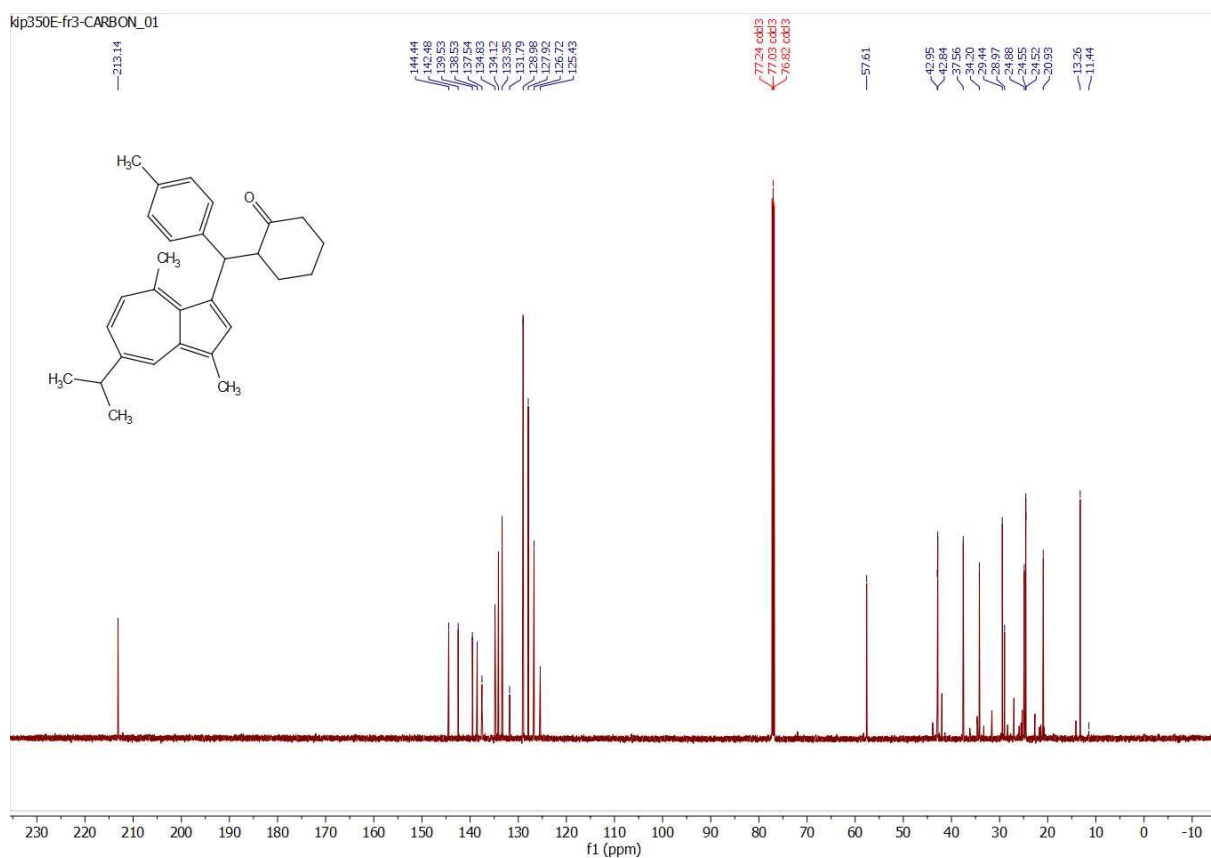

Figure S102.  $^{13}\text{C}$  NMR spectrum of compound **7a/diastereomer 2** (150 MHz,  $\text{CDCl}_3$ ).



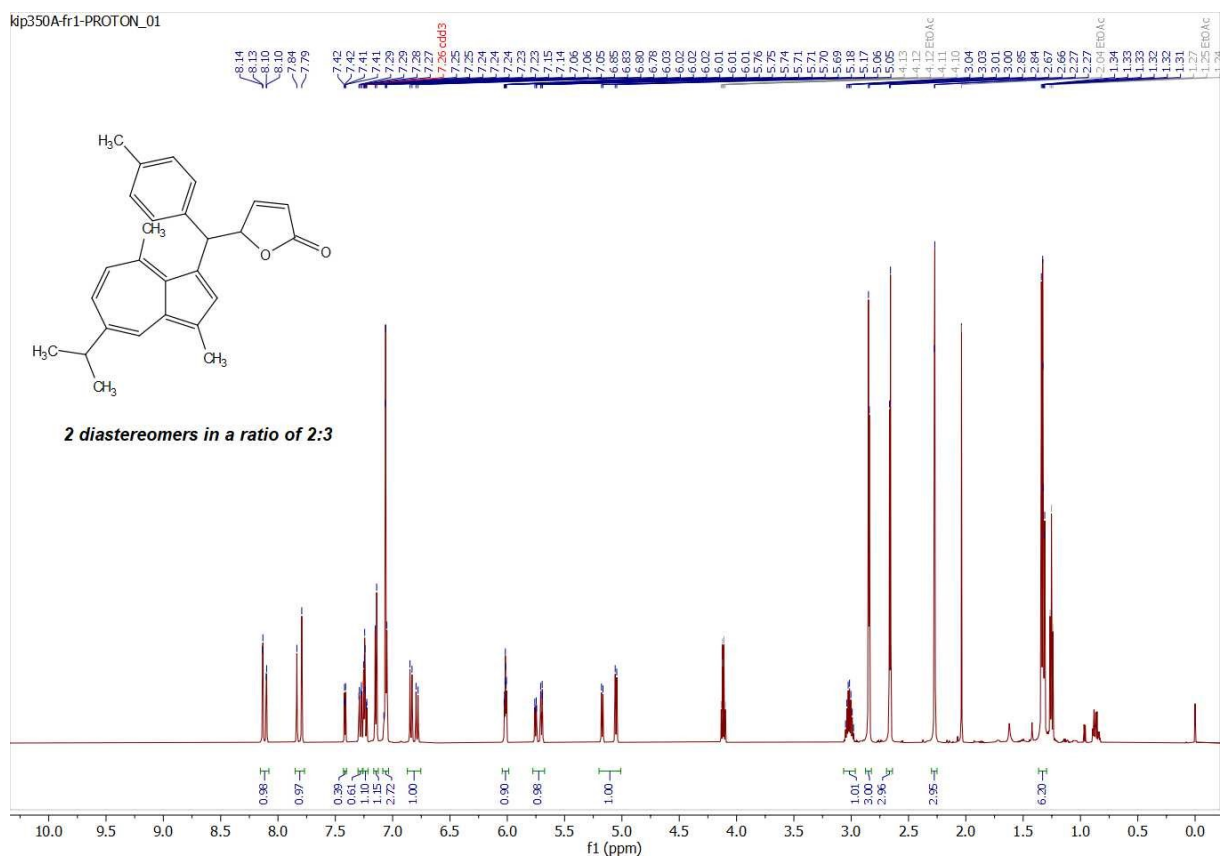

Figure S103.  $^1\text{H}$  NMR spectrum of compound **7b** (600 MHz,  $\text{CDCl}_3$ ).

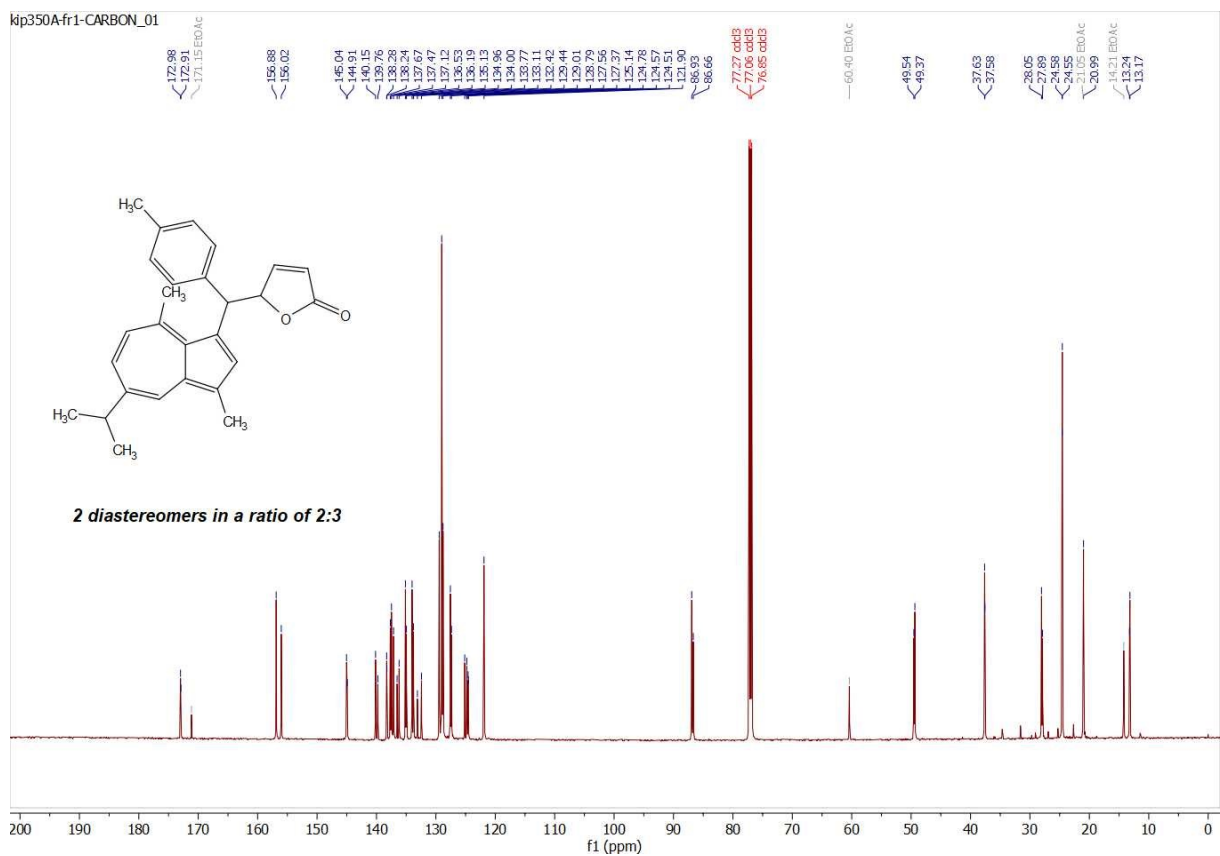

Figure S104.  $^{13}\text{C}$  NMR spectrum of compound **7b** (150 MHz,  $\text{CDCl}_3$ ).



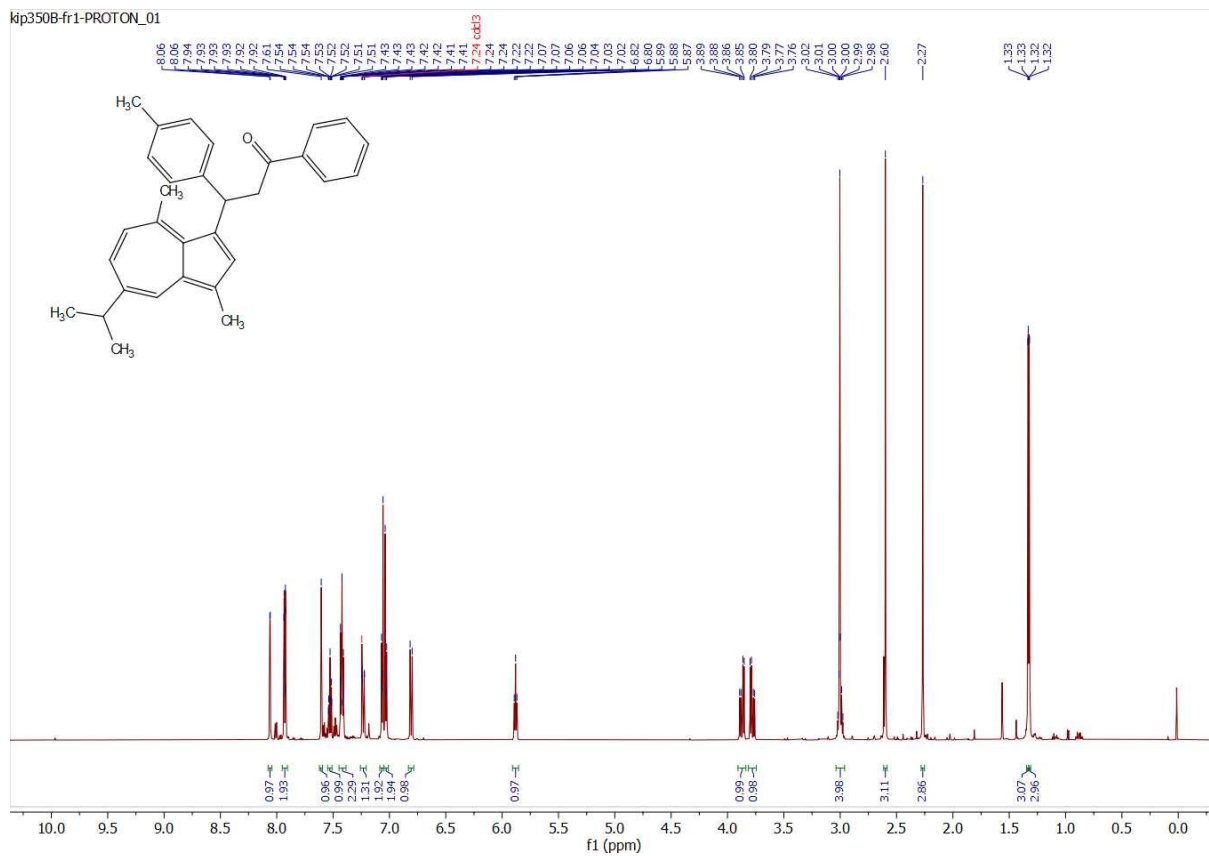

Figure S107.  $^1\text{H}$  NMR spectrum of compound **7d** (600 MHz,  $\text{CDCl}_3$ ).

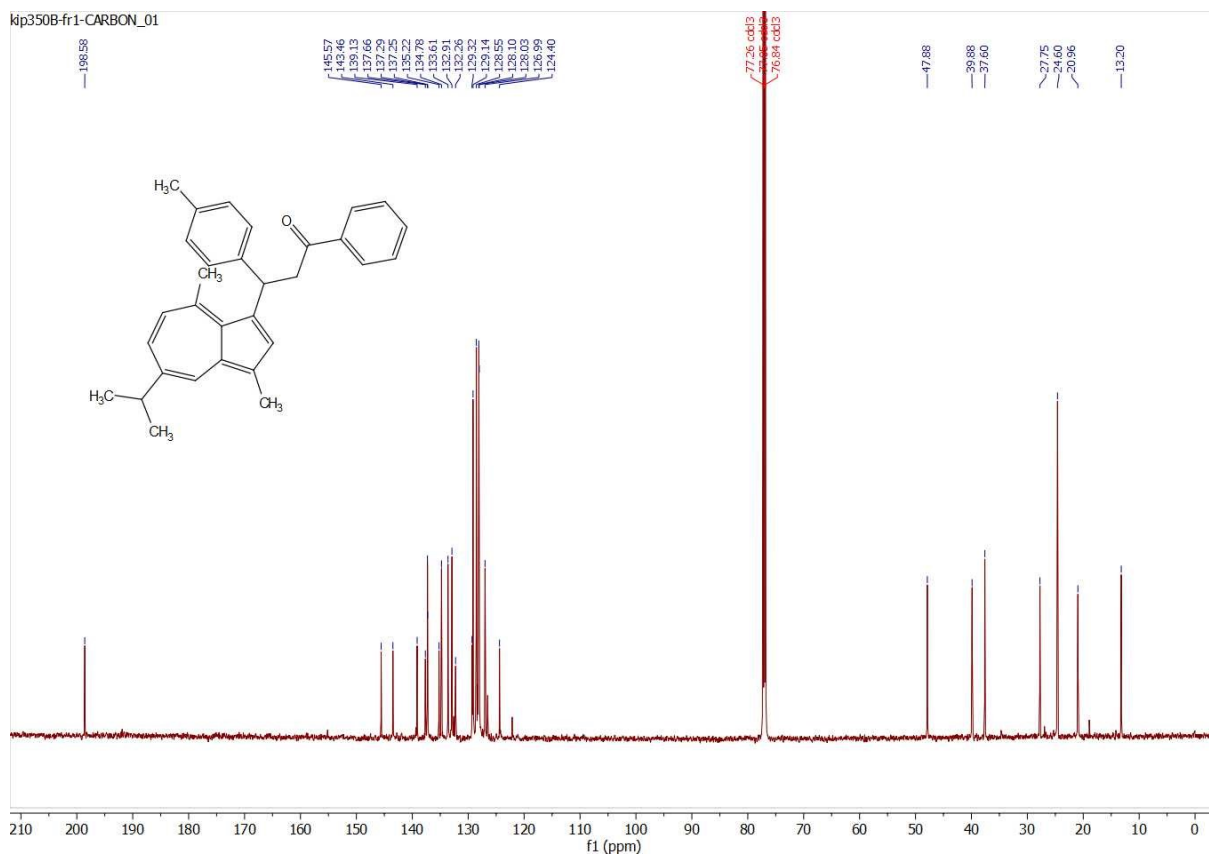

Figure S108.  $^{13}\text{C}$  NMR spectrum of compound **7d** (150 MHz,  $\text{CDCl}_3$ ).

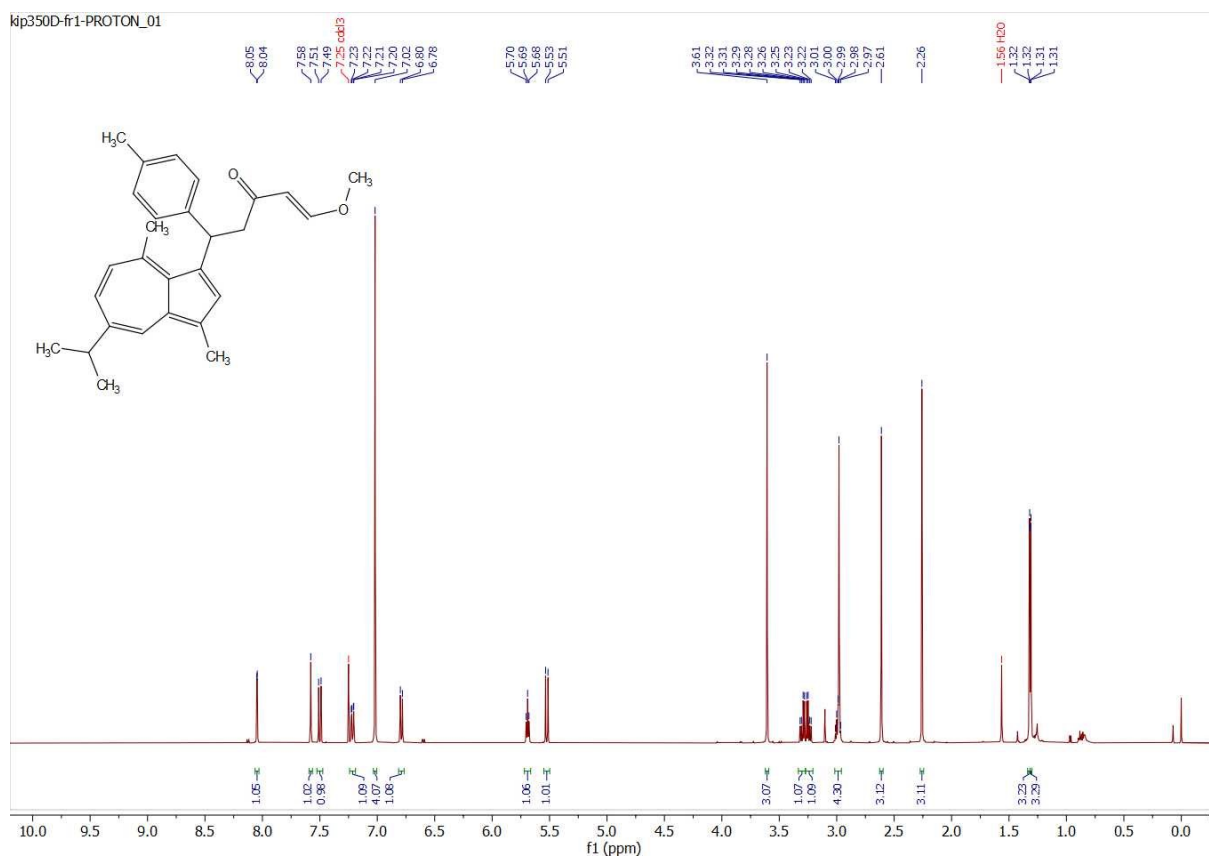

Figure S109.  $^1\text{H}$  NMR spectrum of compound **7e** (600 MHz,  $\text{CDCl}_3$ ).

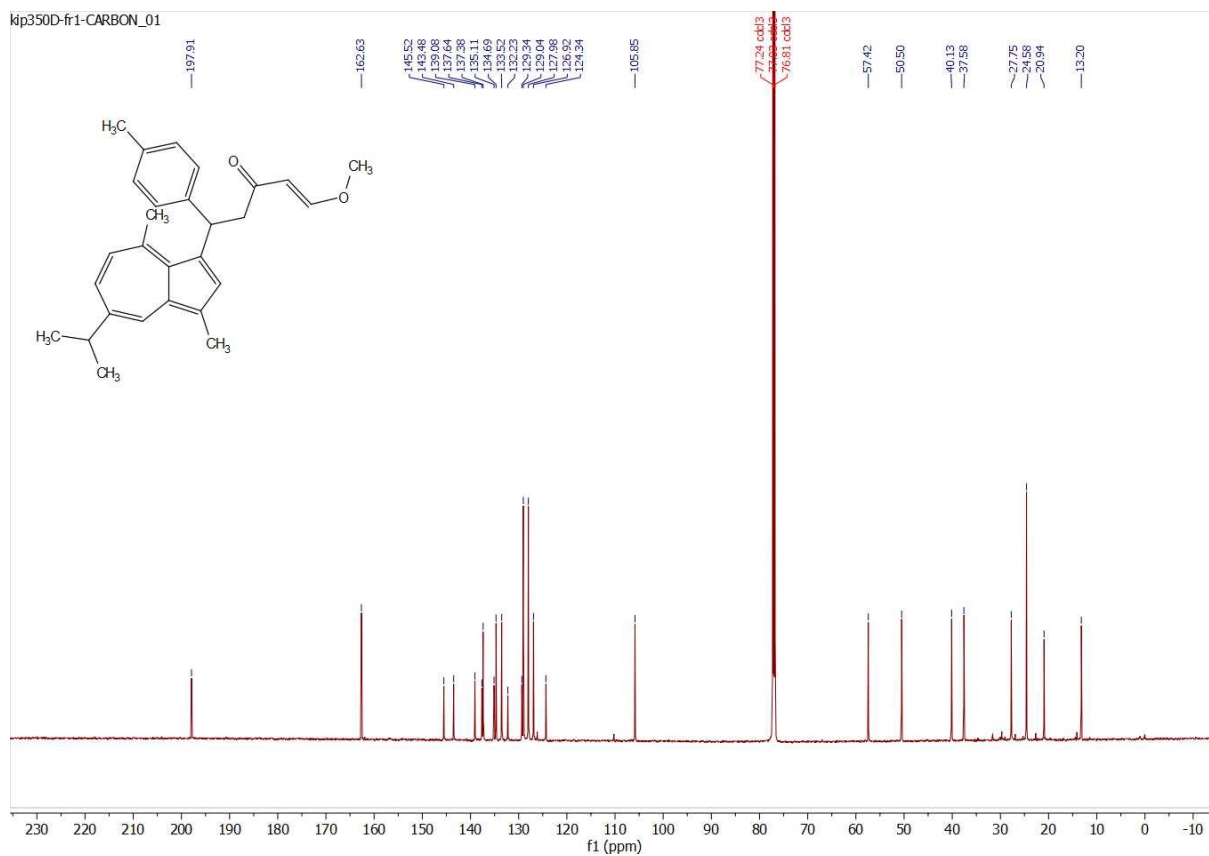

Figure S110.  $^{13}\text{C}$  NMR spectrum of compound **7e** (150 MHz,  $\text{CDCl}_3$ ).

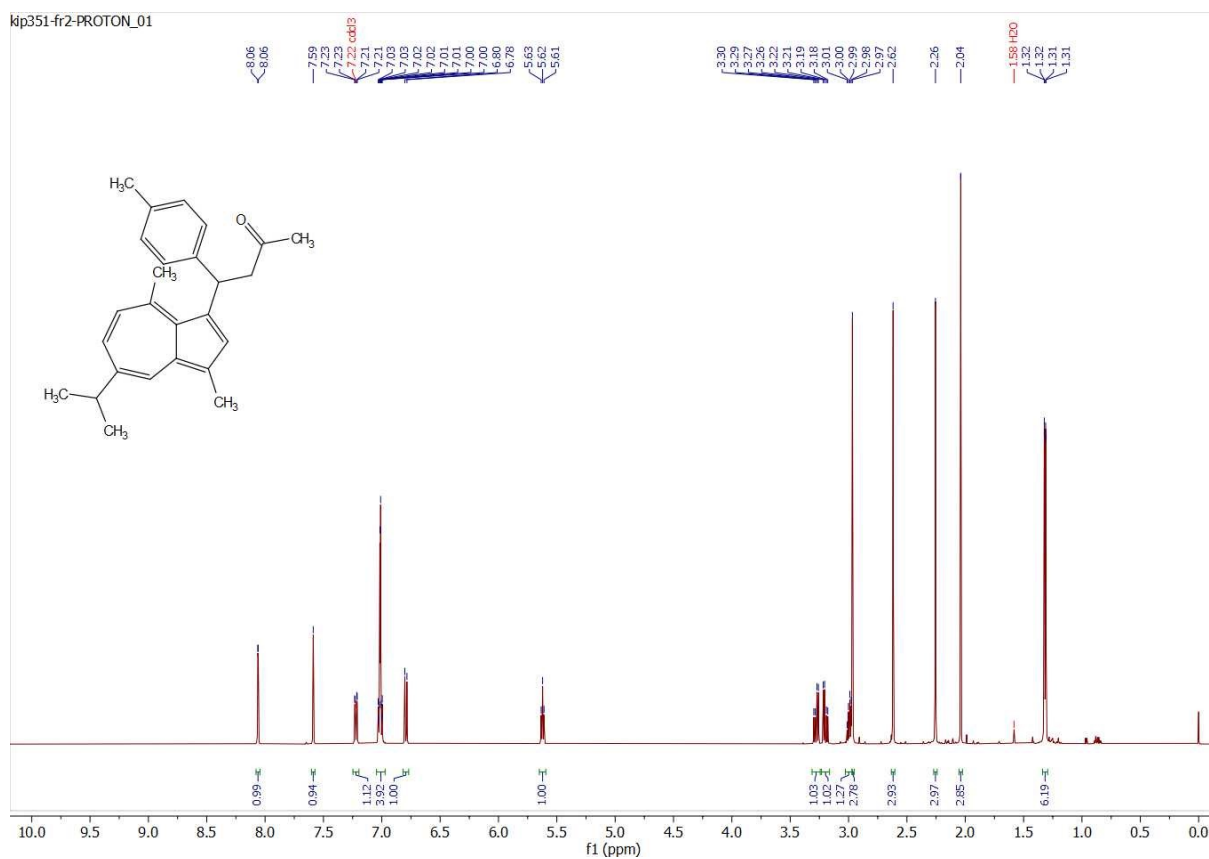

Figure S111.  $^1\text{H}$  NMR spectrum of compound **7f** (600 MHz,  $\text{CDCl}_3$ ).

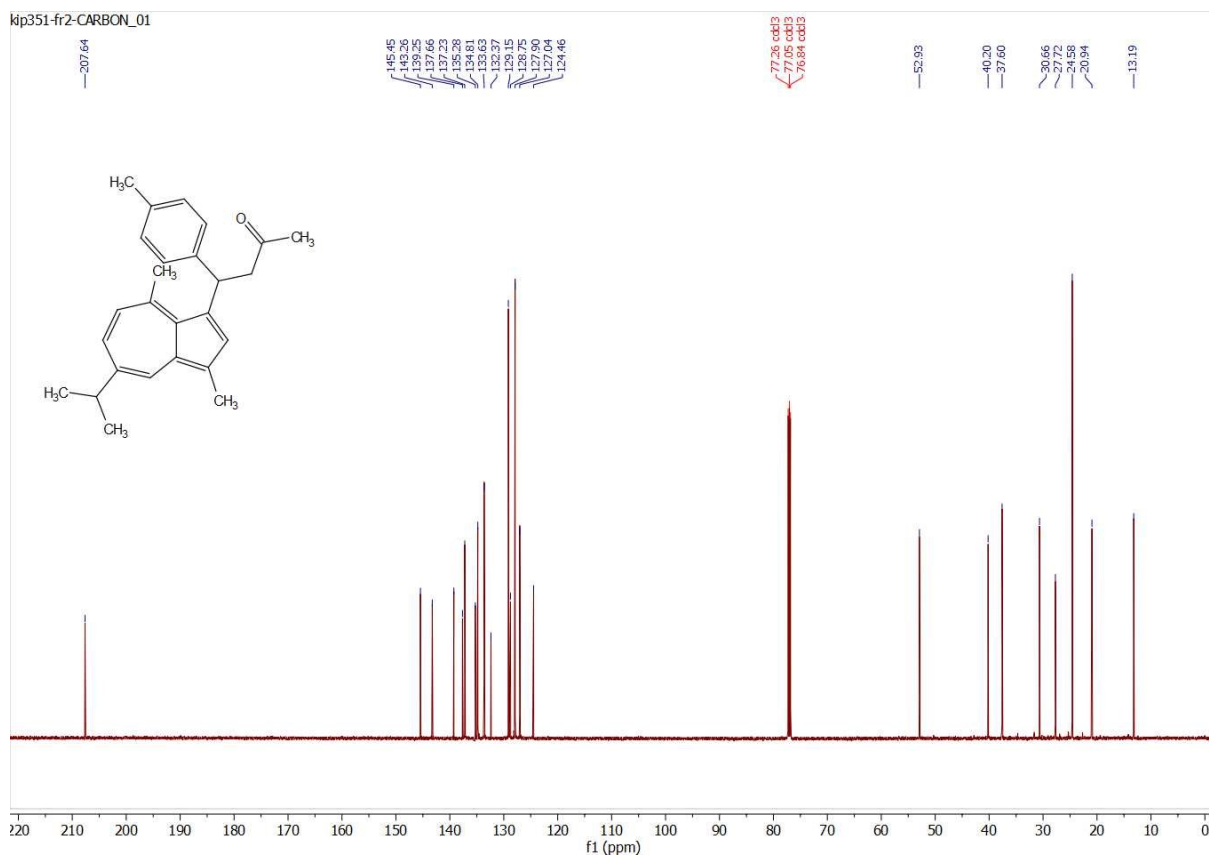

Figure S112.  $^{13}\text{C}$  NMR spectrum of compound **7f** (150 MHz,  $\text{CDCl}_3$ ).

## 8. HPLC chromatograms

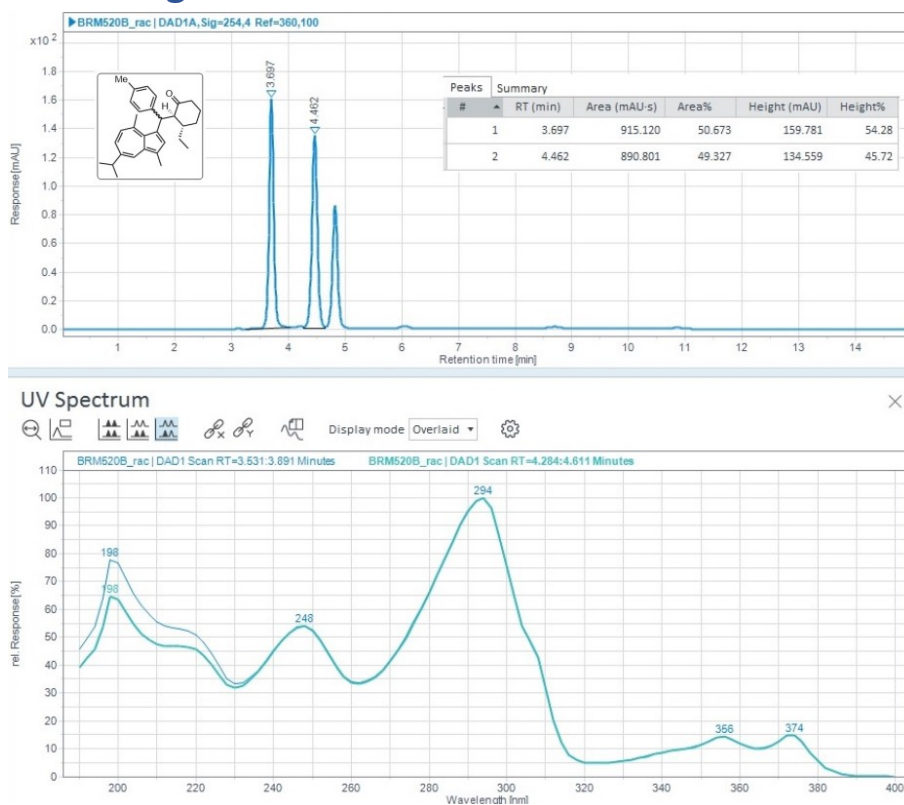

**Figure S113.** HPLC chromatogram of compound [5aa/diastereomer 1](#) (racemic, Chiralpak IA, hexane/*i*-PrOH = 90:10, 1.0 mL/min, 254 nm,  $t_R$ (major) = 3.70 min,  $t_R$ (minor) = 4.46 min).

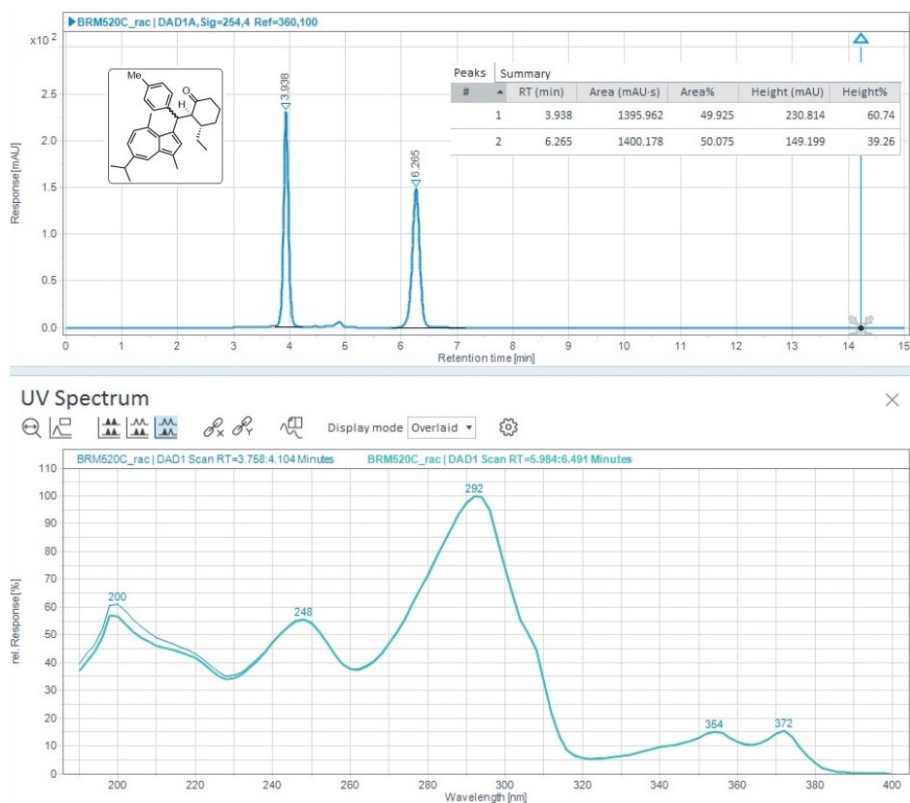

**Figure S114.** HPLC chromatogram of compound [5aa/diastereomer 2](#) (racemic, Chiralpak IA, hexane/*i*-PrOH = 90:10, 1.0 mL/min, 254 nm,  $t_R$ (major) = 3.94 min,  $t_R$ (minor) = 6.27 min).

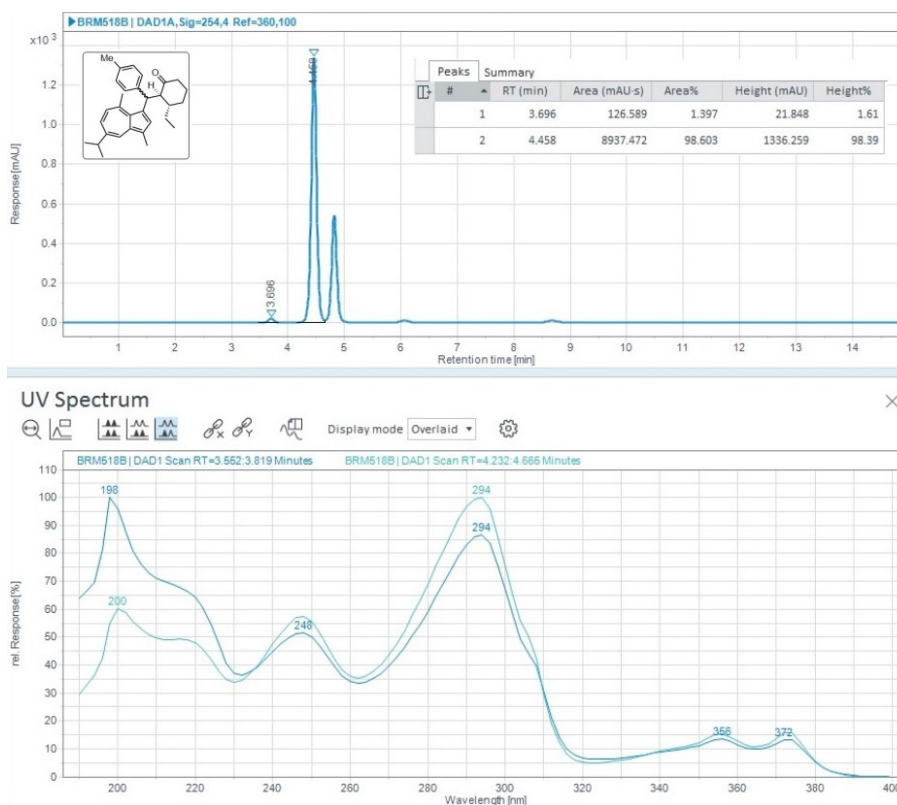

**Figure S115.** HPLC chromatogram of compound **Saa/diastereomer 1** (97% ee, Chiralpak IA, hexane/*i*-PrOH = 90:10, 1.0 mL/min, 254 nm,  $t_R$ (major) = 4.46 min,  $t_R$ (minor)= 3.70 min).

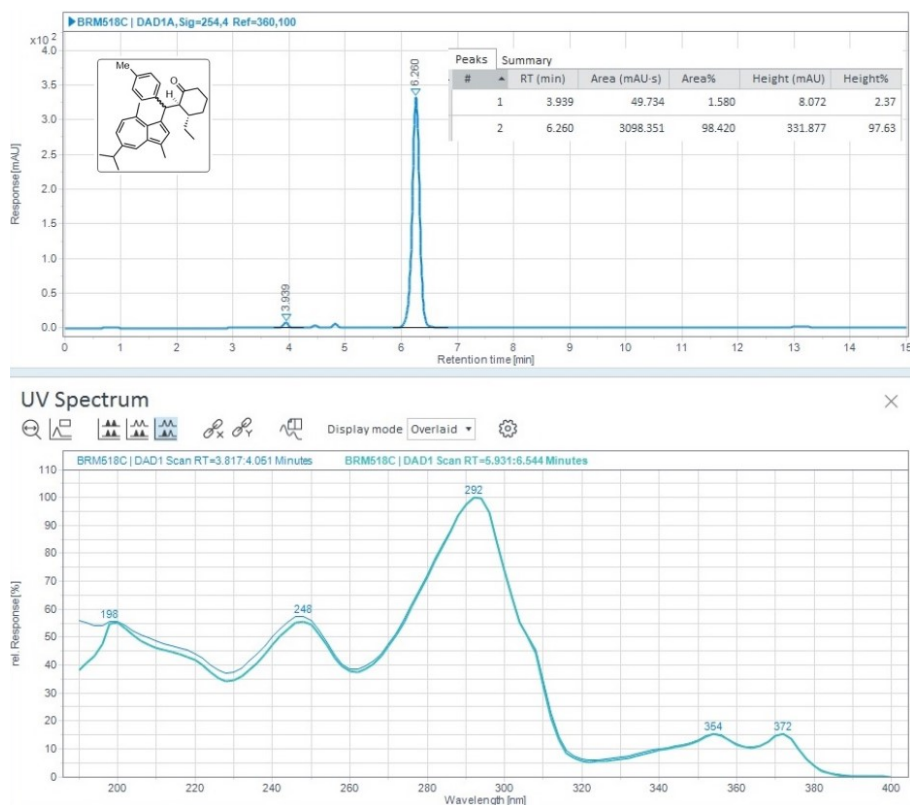

**Figure S116.** HPLC chromatogram of compound **Saa/diastereomer 2** (97% ee, Chiralpak IA, hexane/*i*-PrOH = 90:10, 1.0 mL/min, 254 nm,  $t_R$ (major) = 6.26 min,  $t_R$ (minor)= 3.94 min).



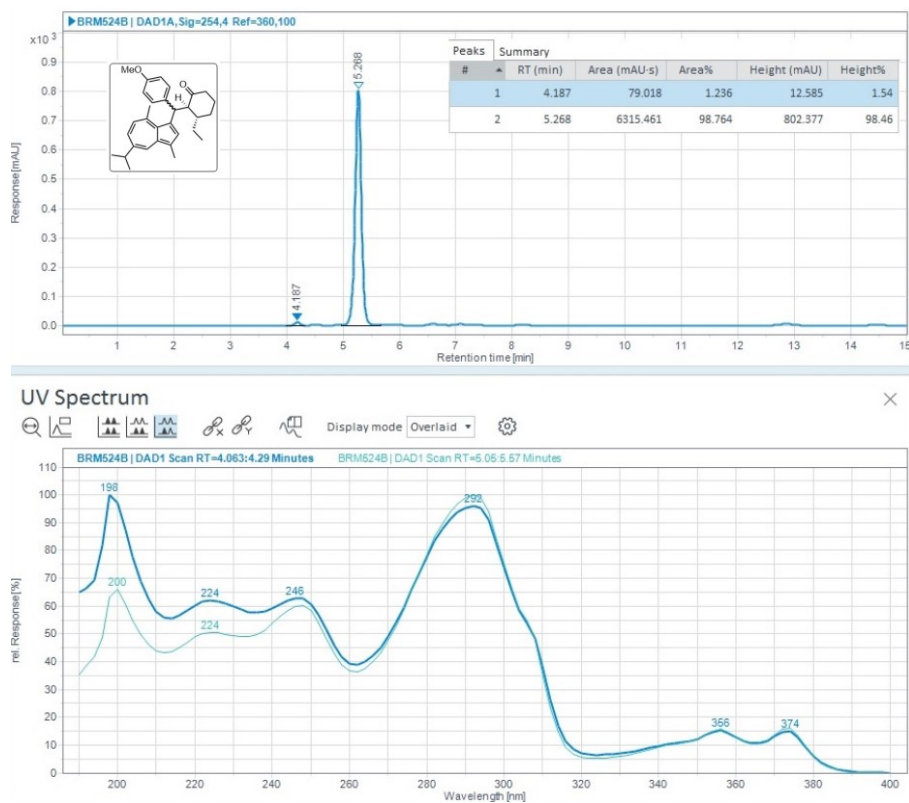

**Figure S117.** HPLC chromatogram of compound [Sab/diastereomer 1](#) (98% ee, Chiralpak IA, hexane/*i*-PrOH = 90:10, 1.0 mL/min, 254 nm,  $t_R$ (major) = 4.19 min,  $t_R$ (minor)= 5.27 min).

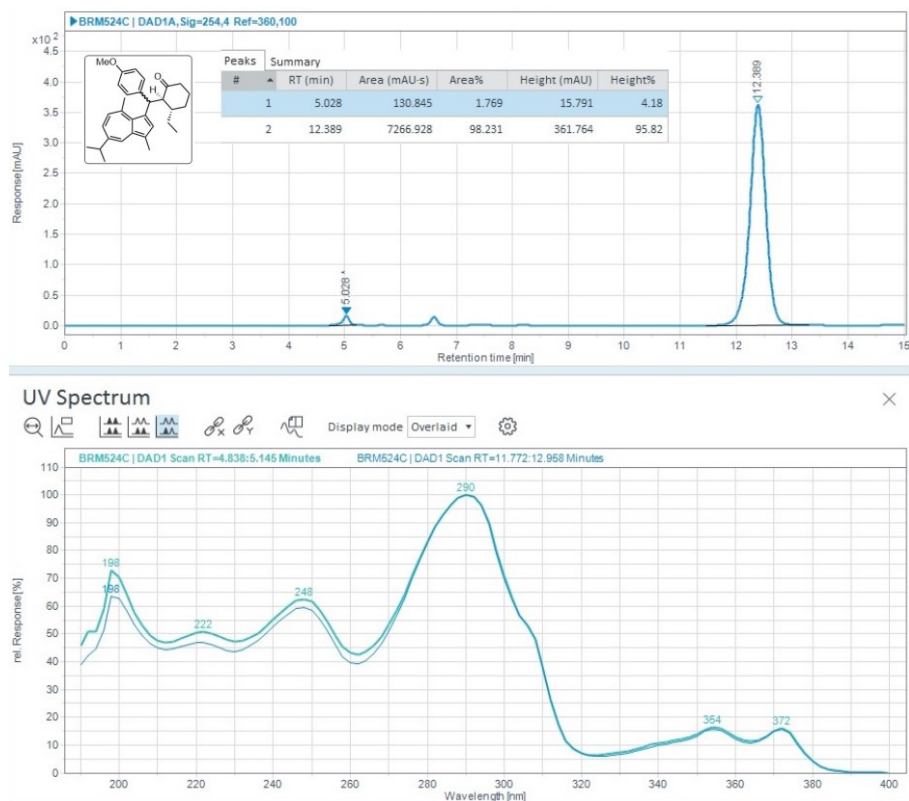

**Figure S118.** HPLC chromatogram of compound [Sab/diastereomer 2](#) (96% ee, Chiralpak IA, hexane/*i*-PrOH = 90:10, 1.0 mL/min, 254 nm,  $t_R$ (major) = 12.39 min,  $t_R$ (minor)= 5.03 min).

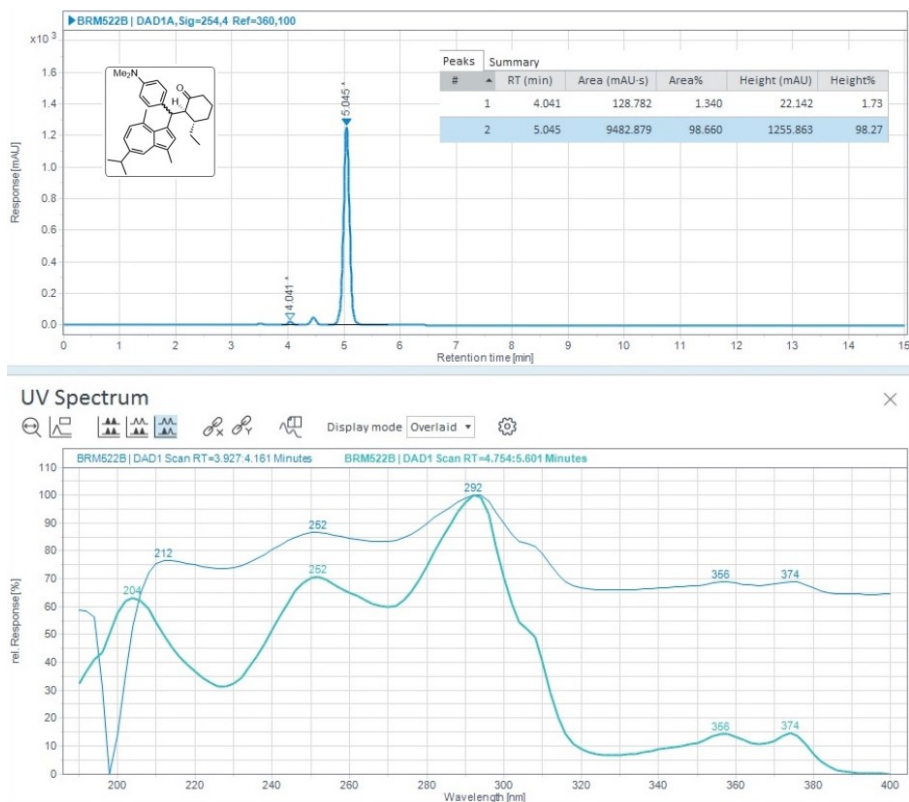

**Figure S119.** HPLC chromatogram of compound [Sac/diastereomer 1](#) (97% ee, Chiralpak IA, hexane/*i*-PrOH = 90:10, 1.0 mL/min, 254 nm,  $t_R$ (major) = 5.05 min,  $t_R$ (minor)= 4.04 min).

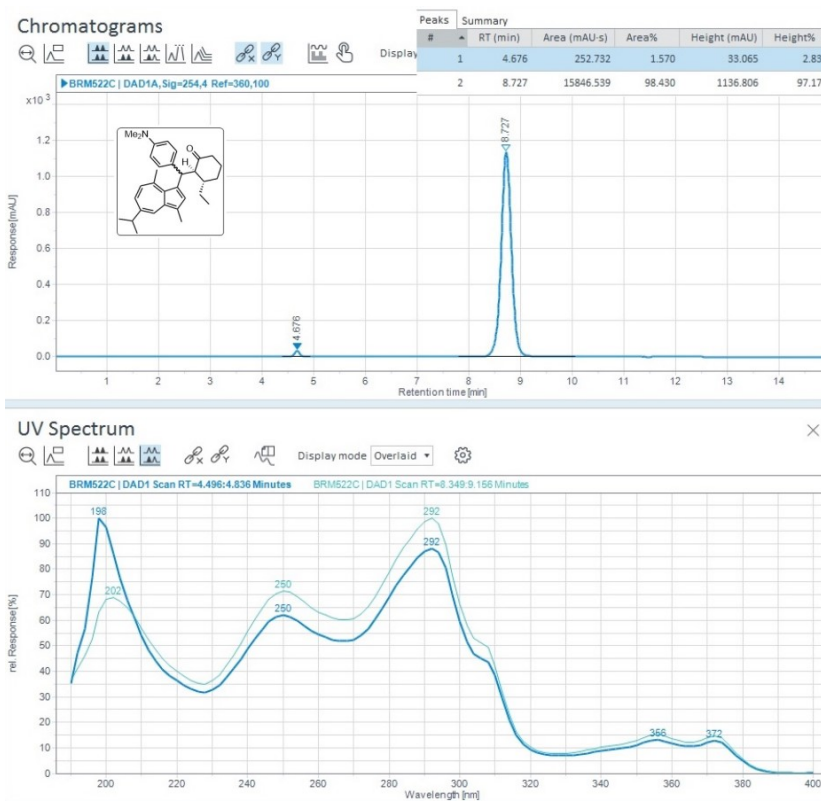

**Figure S120.** HPLC chromatogram of compound [Sac/diastereomer 2](#) (97% ee, Chiralpak IA, hexane/*i*-PrOH = 90:10, 1.0 mL/min, 254 nm,  $t_R$ (major) = 8.73 min,  $t_R$ (minor)= 4.68 min).

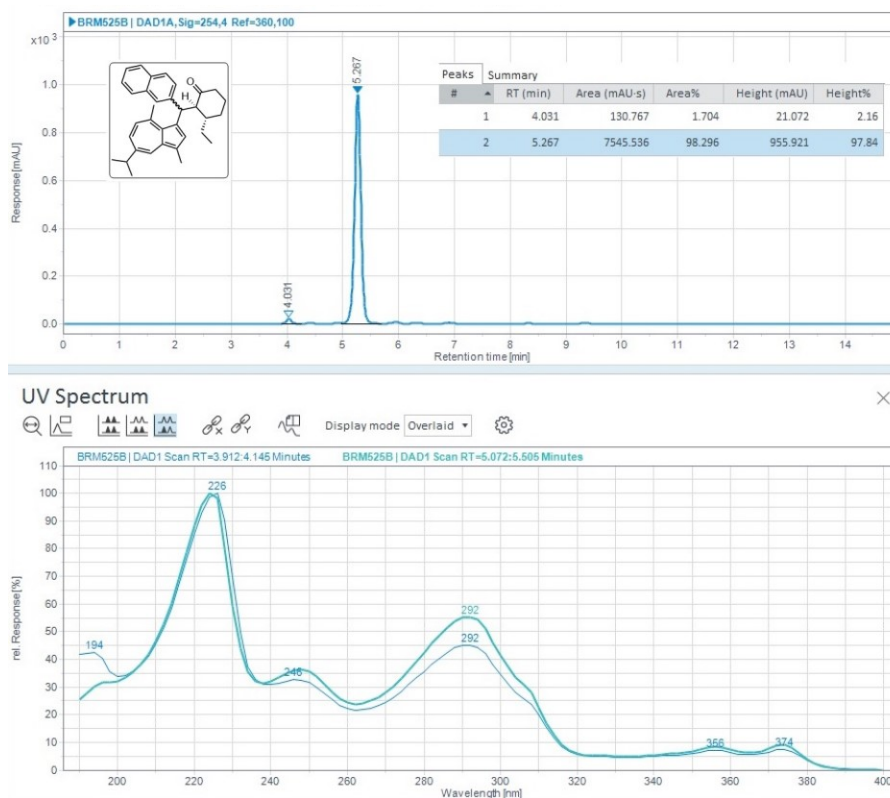

**Figure S121.** HPLC chromatogram of compound [Sad/diastereomer 1](#) (97% ee, Chiralpak IA, hexane/*i*-PrOH = 90:10, 1.0 mL/min, 254 nm,  $t_R$ (major) = 5.27 min,  $t_R$ (minor)= 4.03 min).

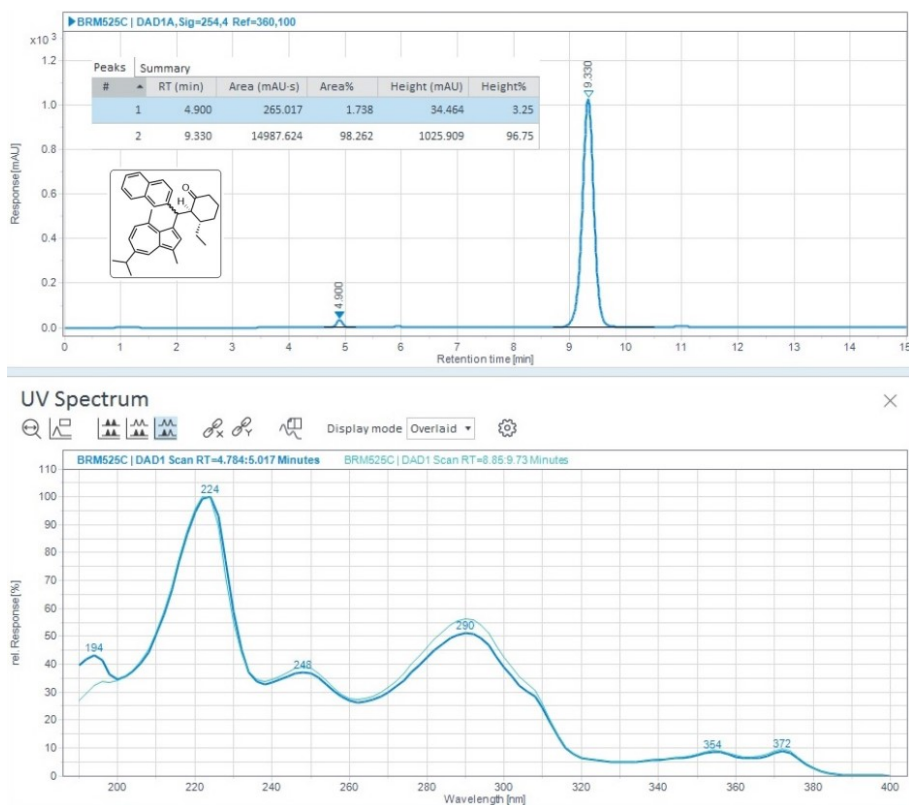

**Figure S122.** HPLC chromatogram of compound [Sad/diastereomer 2](#) (97% ee, Chiralpak IA, hexane/*i*-PrOH = 90:10, 1.0 mL/min, 254 nm,  $t_R$ (major) = 9.33 min,  $t_R$ (minor)= 4.90 min).

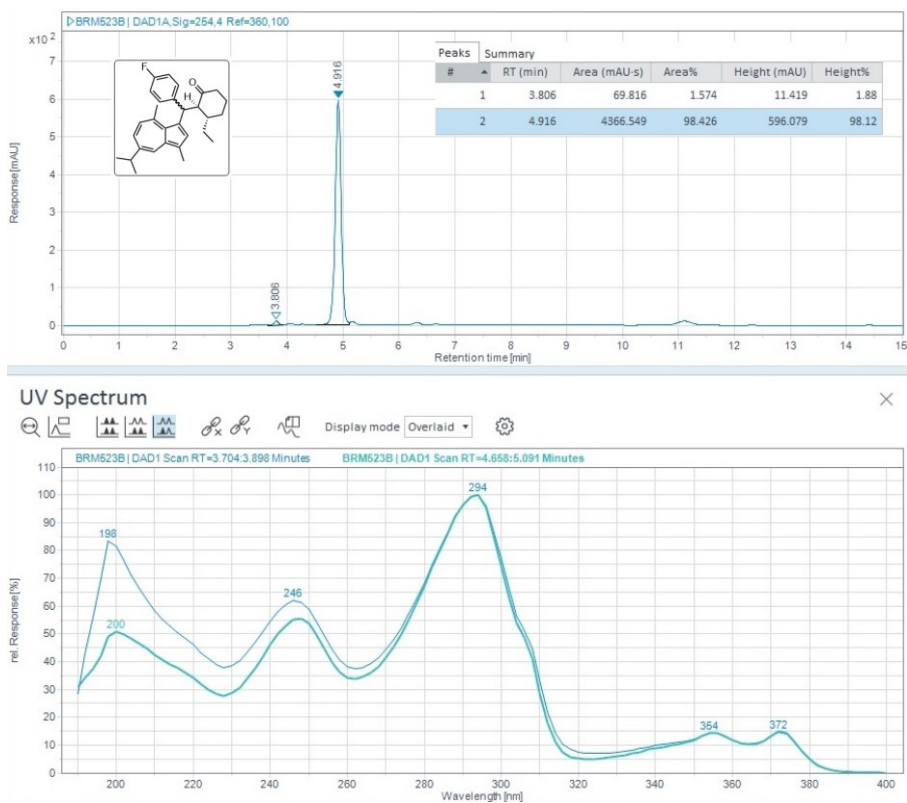

**Figure S123.** HPLC chromatogram of compound **Sae/diastereomer 1** (97% ee, Chiralpak IA, hexane/*i*-PrOH = 90:10, 1.0 mL/min, 254 nm,  $t_R$ (major) = 4.91 min,  $t_R$ (minor) = 3.81 min).

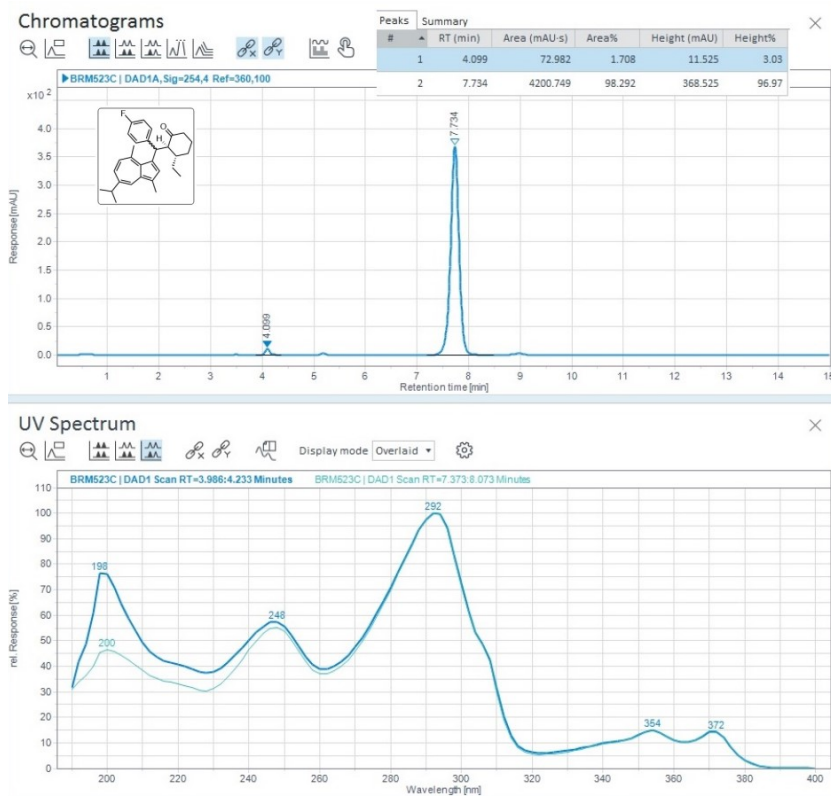

**Figure S124.** HPLC chromatogram of compound **Sae/diastereomer 2** (97% ee, Chiralpak IA, hexane/*i*-PrOH = 90:10, 1.0 mL/min, 254 nm,  $t_R$ (major) = 7.73 min,  $t_R$ (minor) = 4.10 min).

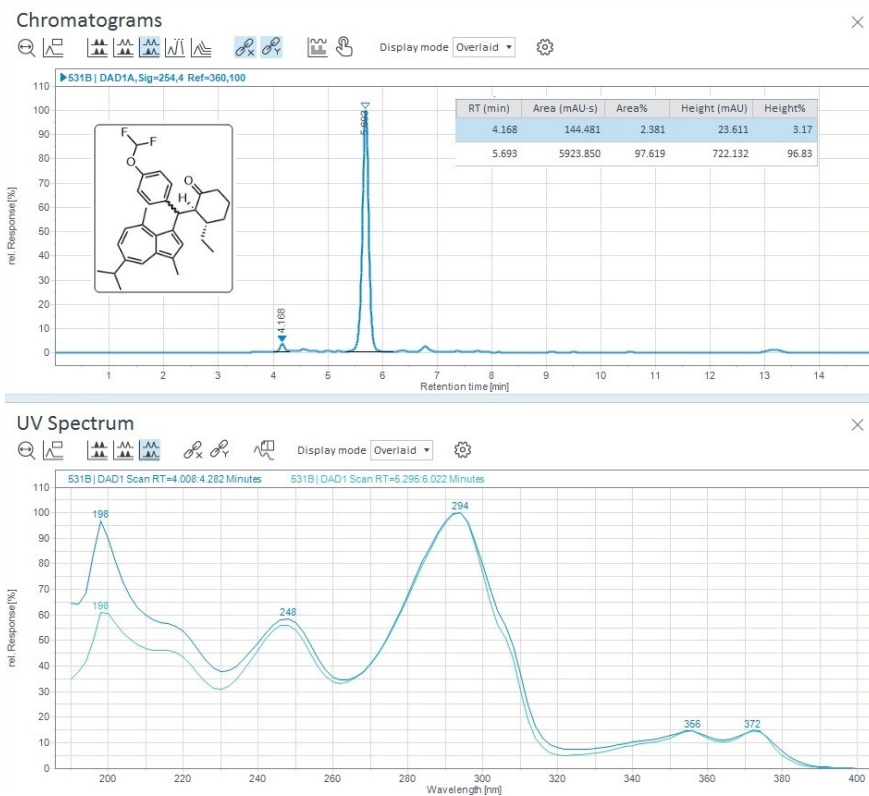

**Figure S125.** HPLC chromatogram of compound [5af/diastereomer 1](#) (95% ee, Chiralpak IA, hexane/*i*-PrOH = 90:10, 1.0 mL/min, 254 nm,  $t_R$ (major) = 5.69 min,  $t_R$ (minor)= 4.17 min).

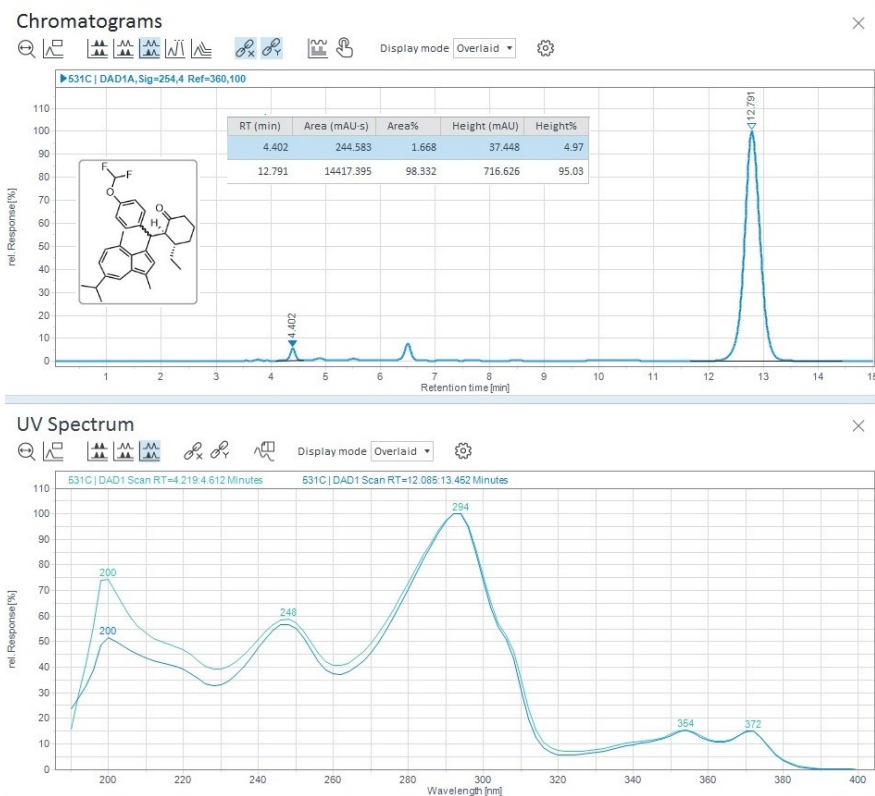

**Figure S126.** HPLC chromatogram of compound [5af/diastereomer 2](#) (97% ee, Chiralpak IA, hexane/*i*-PrOH = 90:10, 1.0 mL/min, 254 nm,  $t_R$ (major) = 12.79 min,  $t_R$ (minor)= 4.40 min).



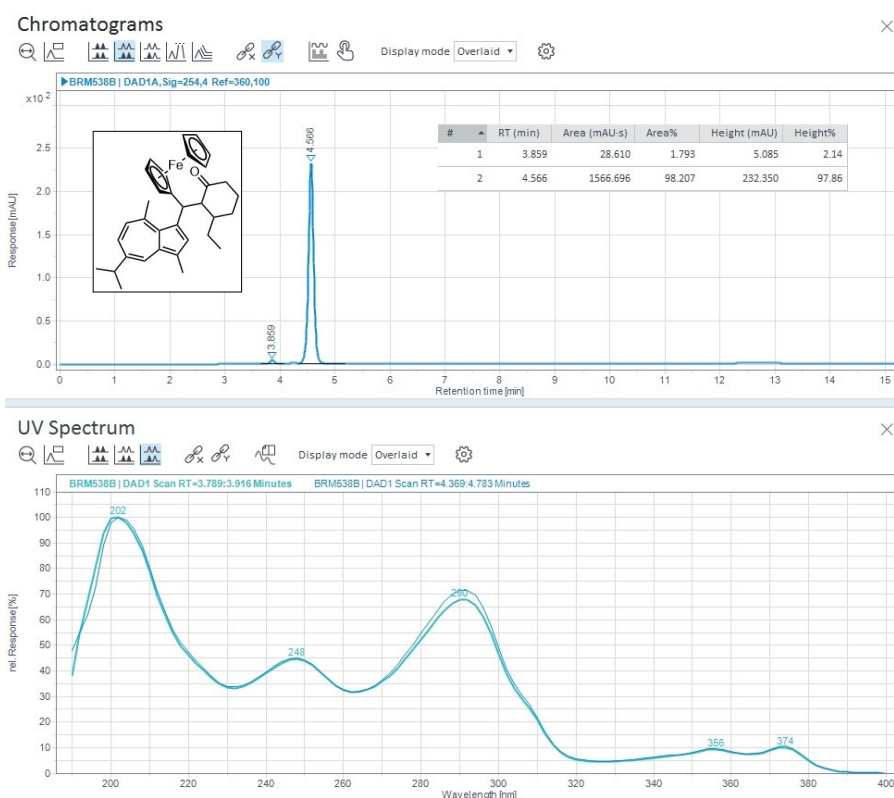

**Figure S127.** HPLC chromatogram of compound [Sag/diastereomer 1](#) (96% ee, Chiralpak IA, hexane/*i*-PrOH = 90:10, 1.0 mL/min, 254 nm,  $t_R$ (major) = 4.57 min,  $t_R$ (minor)= 3.86 min).

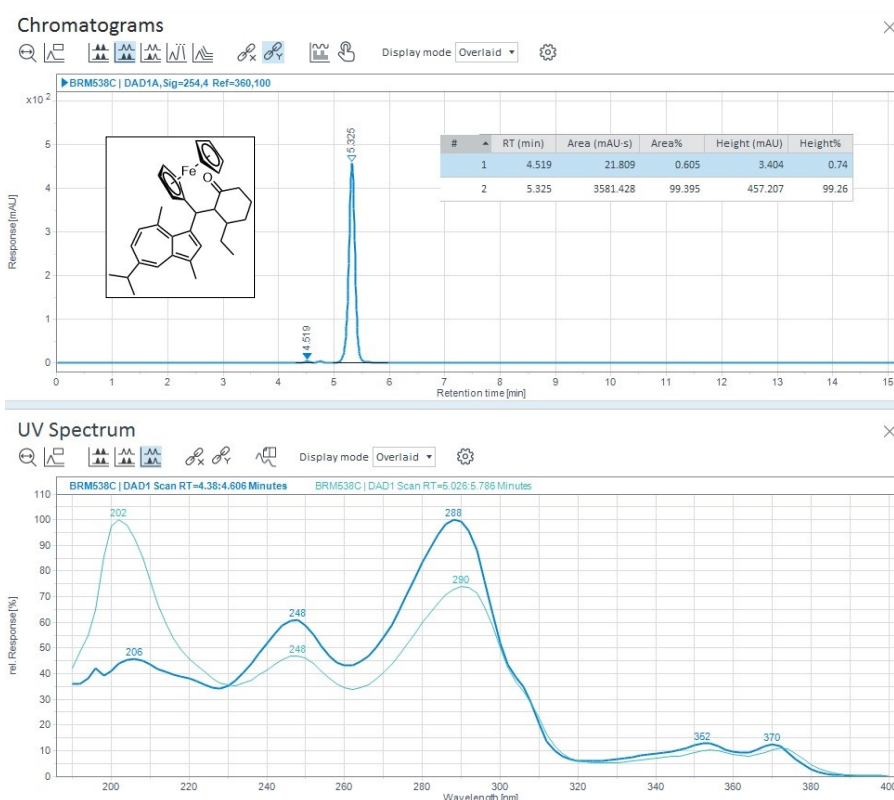

**Figure S128.** HPLC chromatogram of compound [Sag/diastereomer 2](#) (99% ee, Chiralpak IA, hexane/*i*-PrOH = 90:10, 1.0 mL/min, 254 nm,  $t_R$ (major) = 5.33 min,  $t_R$ (minor)= 4.52 min).

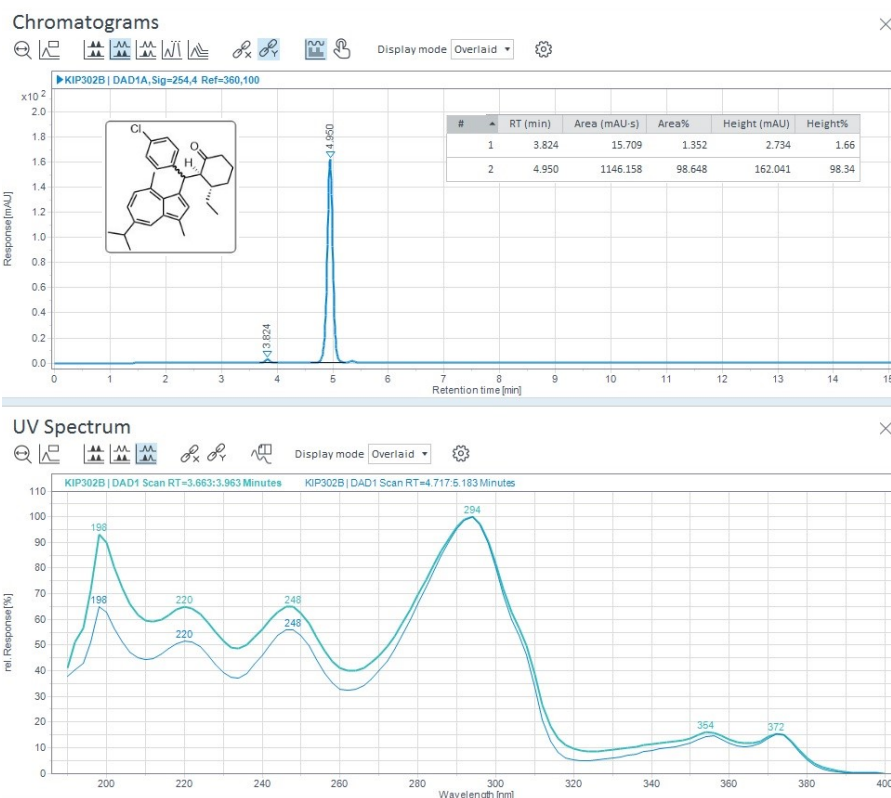

Figure S129. HPLC chromatogram of compound [Sah/diastereomer 1](#) (97% ee, Chiralpak IA, hexane/*i*-PrOH = 90:10, 1.0 mL/min, 254 nm,  $t_R$ (major) = 4.95 min,  $t_R$ (minor)= 3.82 min).

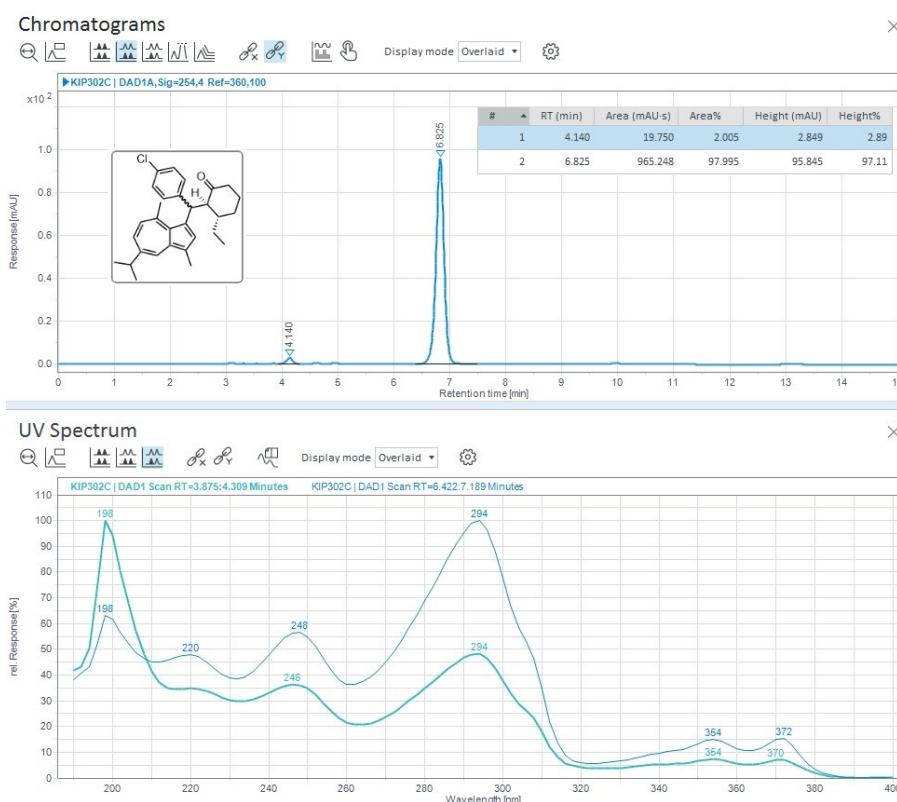

Figure S130. HPLC chromatogram of compound [Sah/diastereomer 2](#) (96% ee, Chiralpak IA, hexane/*i*-PrOH = 90:10, 1.0 mL/min, 254 nm,  $t_R$ (major) = 6.83 min,  $t_R$ (minor)= 4.14 min).



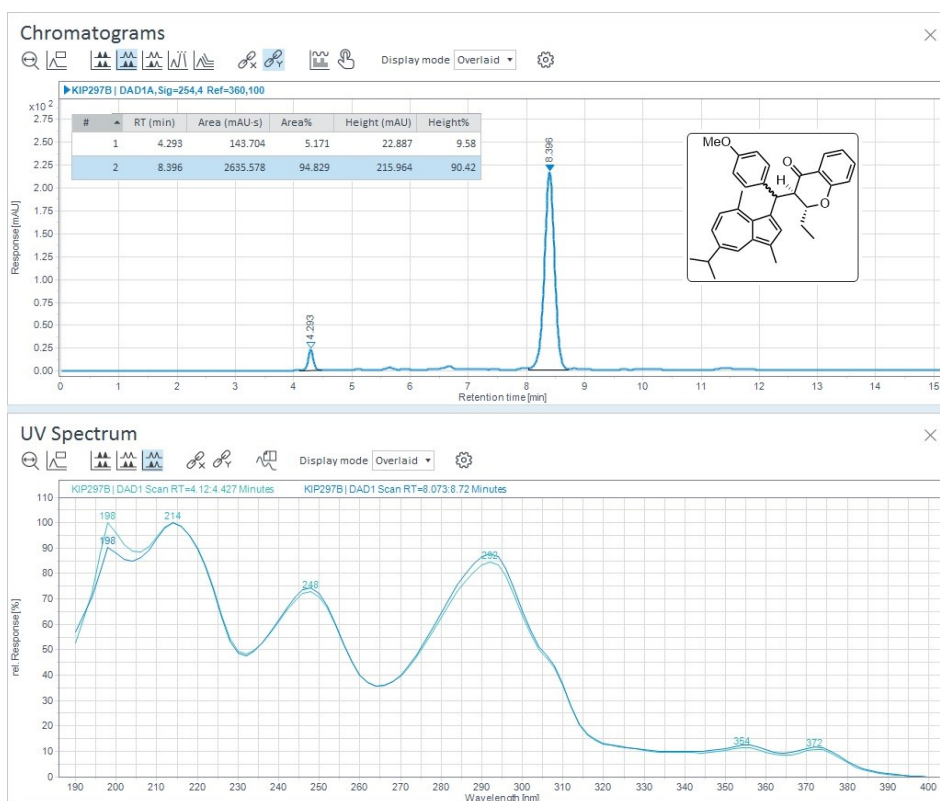

**Figure S131.** HPLC chromatogram of compound [5bb/diastereomer 1](#) (90% ee, Chiralpak IA, hexane/*i*-PrOH = 90:10, 1.0 mL/min, 254 nm,  $t_R$ (major) = 8.40 min,  $t_R$ (minor)= 4.29 min).

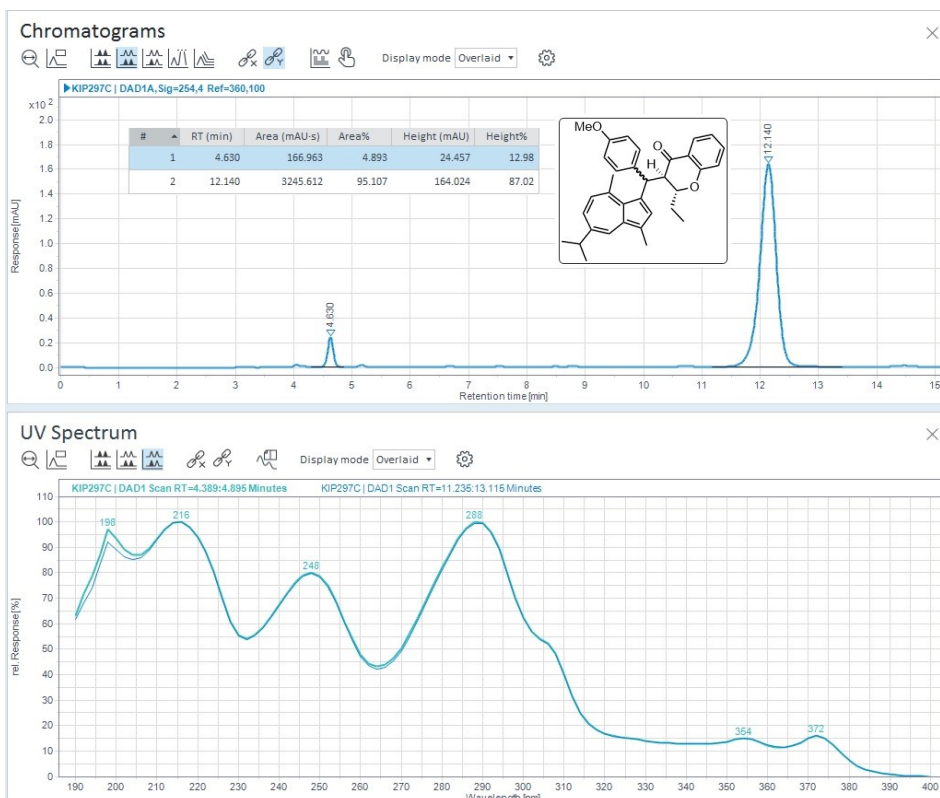

**Figure S132.** HPLC chromatogram of compound [5bb/diastereomer 2](#) (90% ee, Chiralpak IA, hexane/*i*-PrOH = 90:10, 1.0 mL/min, 254 nm,  $t_R$ (major) = 12.14 min,  $t_R$ (minor)= 4.63 min).

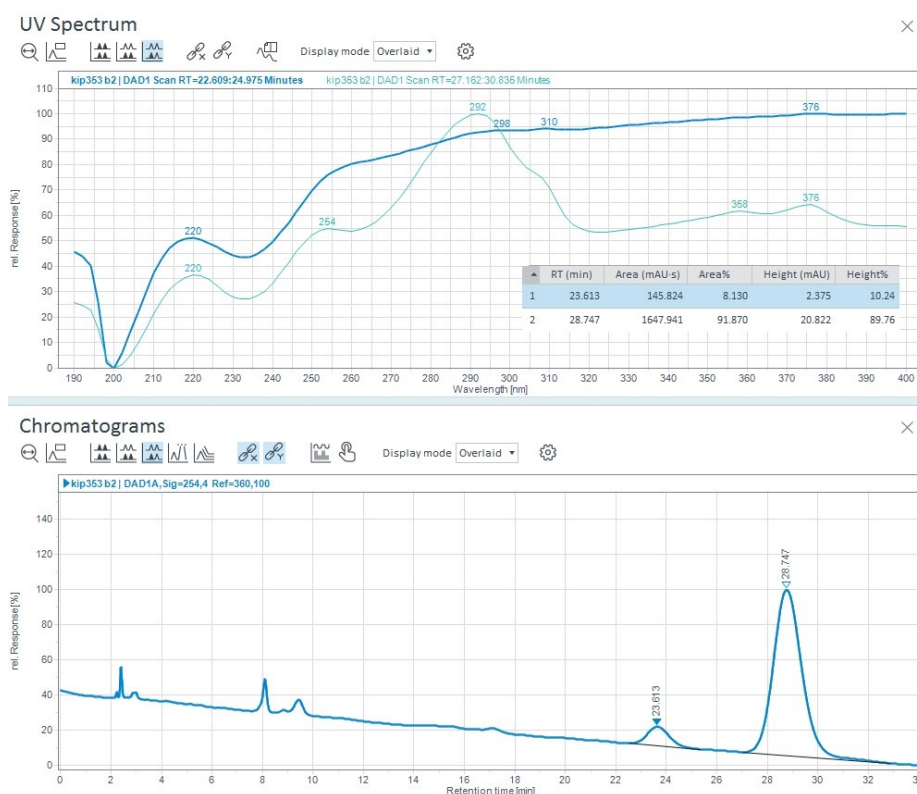

**Figure S133.** HPLC chromatogram of compound [5cb/diastereomer 1](#) (84% ee, Chiralpak IC, hexane/*i*-PrOH = 90:10, 1.5 mL/min, 254 nm,  $t_R$ (major) = 23.61 min,  $t_R$ (minor)= 28.75 min).

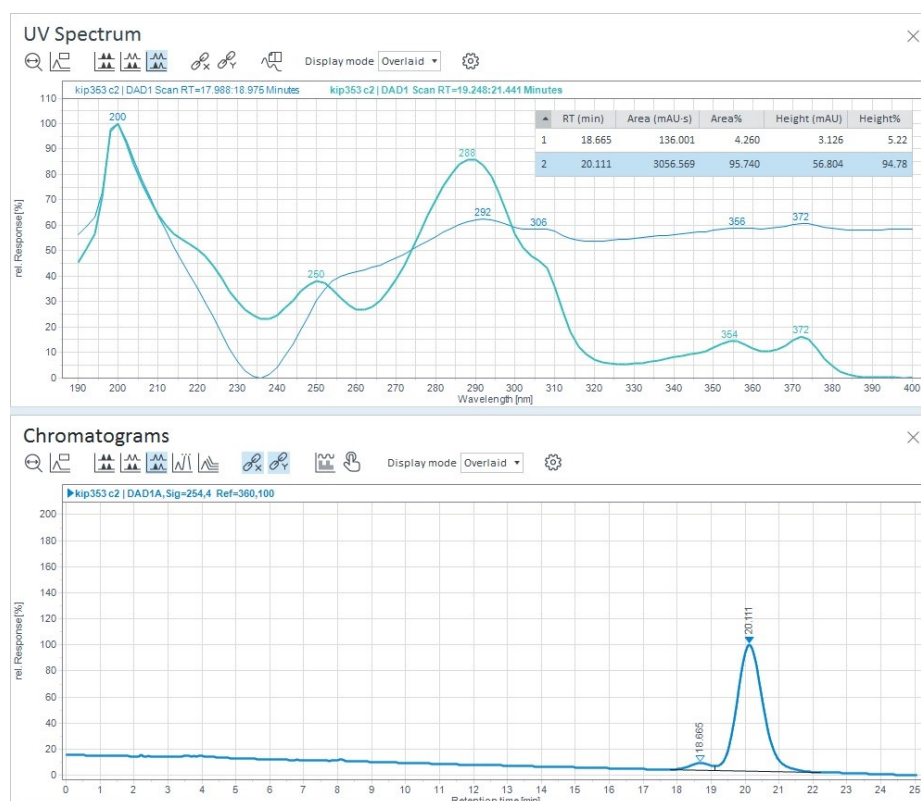

**Figure S134.** HPLC chromatogram of compound [5cb/diastereomer 2](#) (91% ee, Chiralpak IC, hexane/*i*-PrOH = 90:10, 1.5 mL/min, 254 nm,  $t_R$ (major) = 20.11 min,  $t_R$ (minor)= 18.67 min).

## 9. HRMS pictures

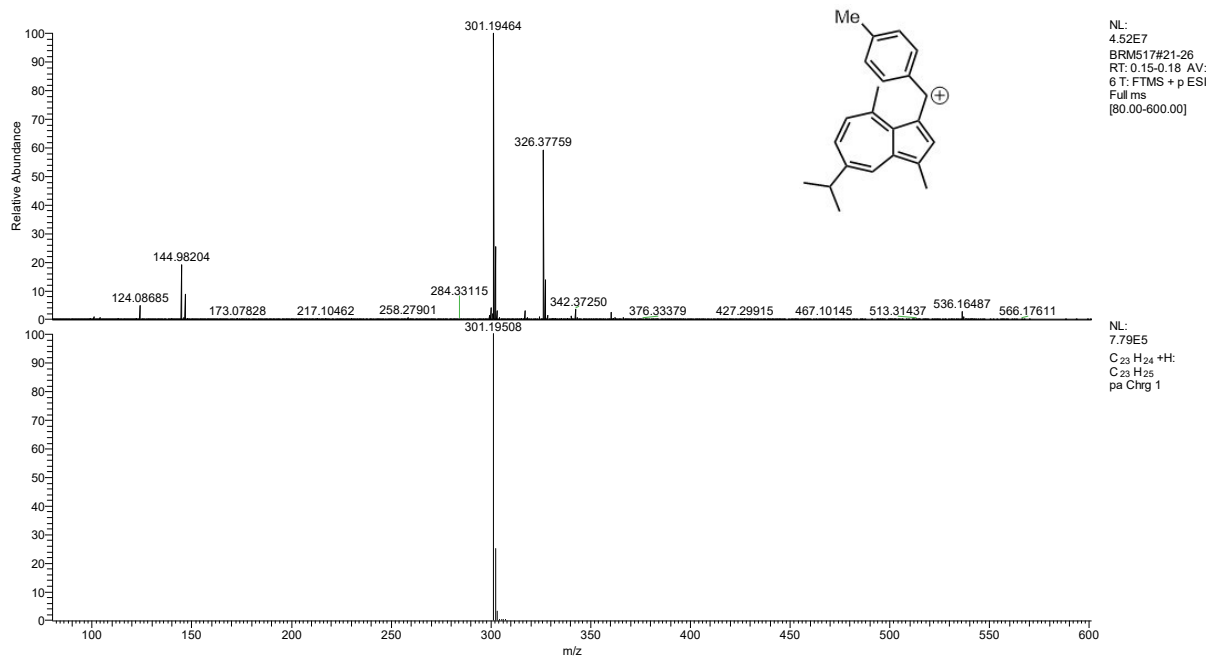

Figure S135. HRMS picture of compound [2a](#).

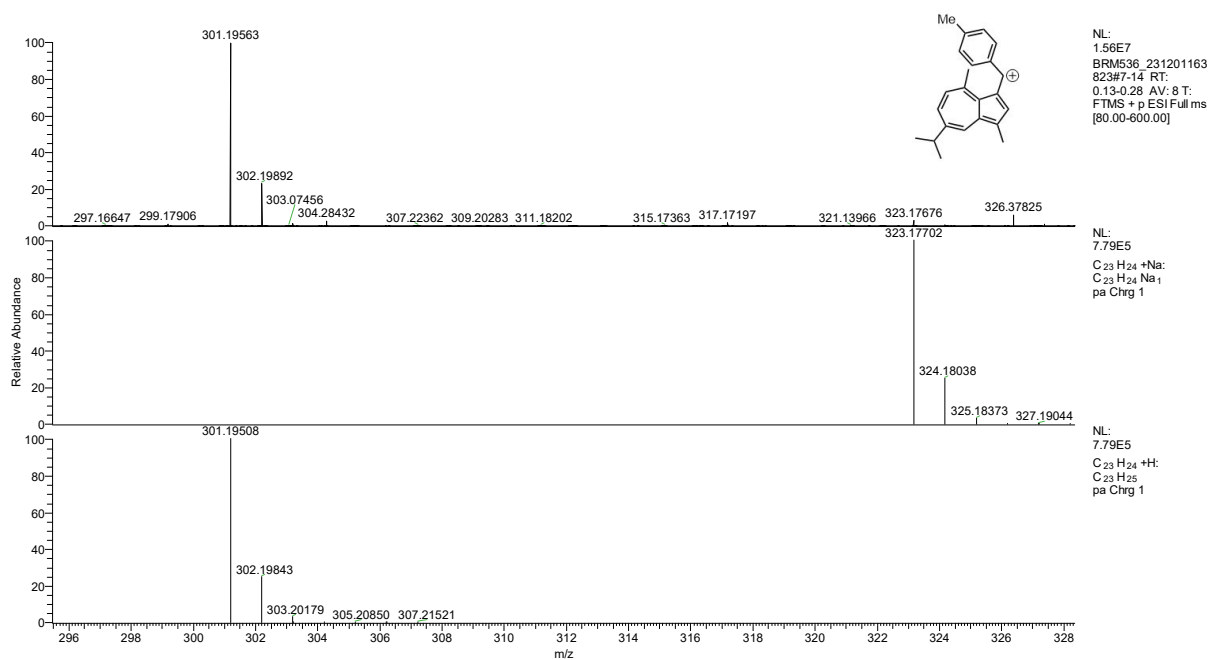

Figure S136. HRMS picture of compound [2a'](#).

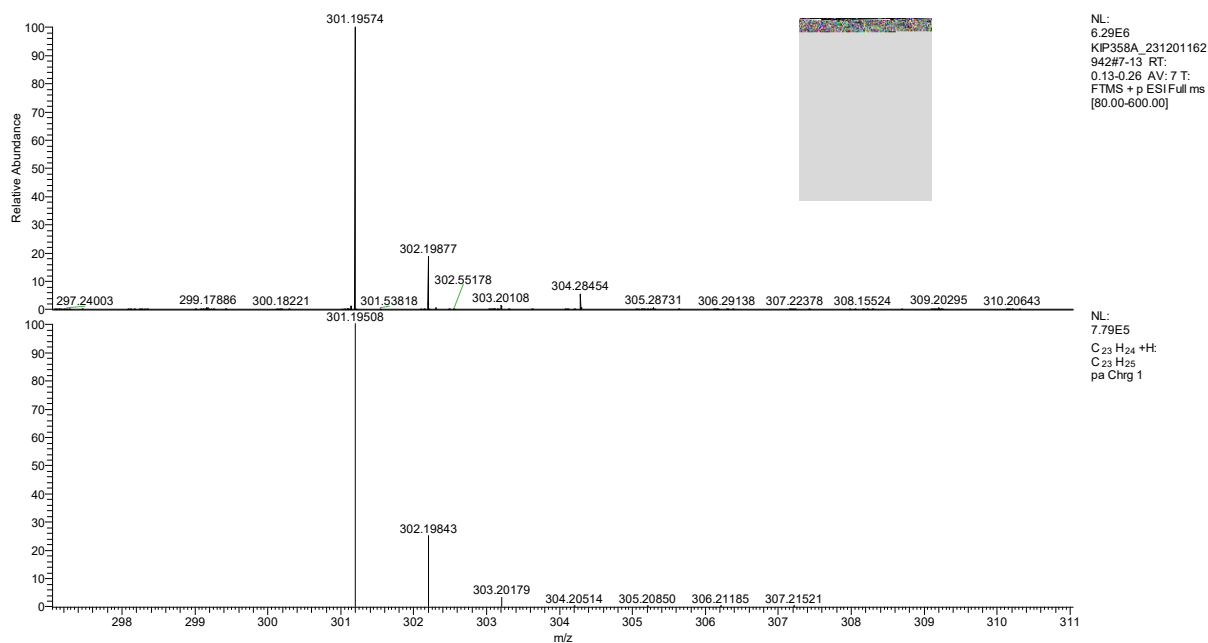

Figure S137. HRMS picture of compound **2a''**.

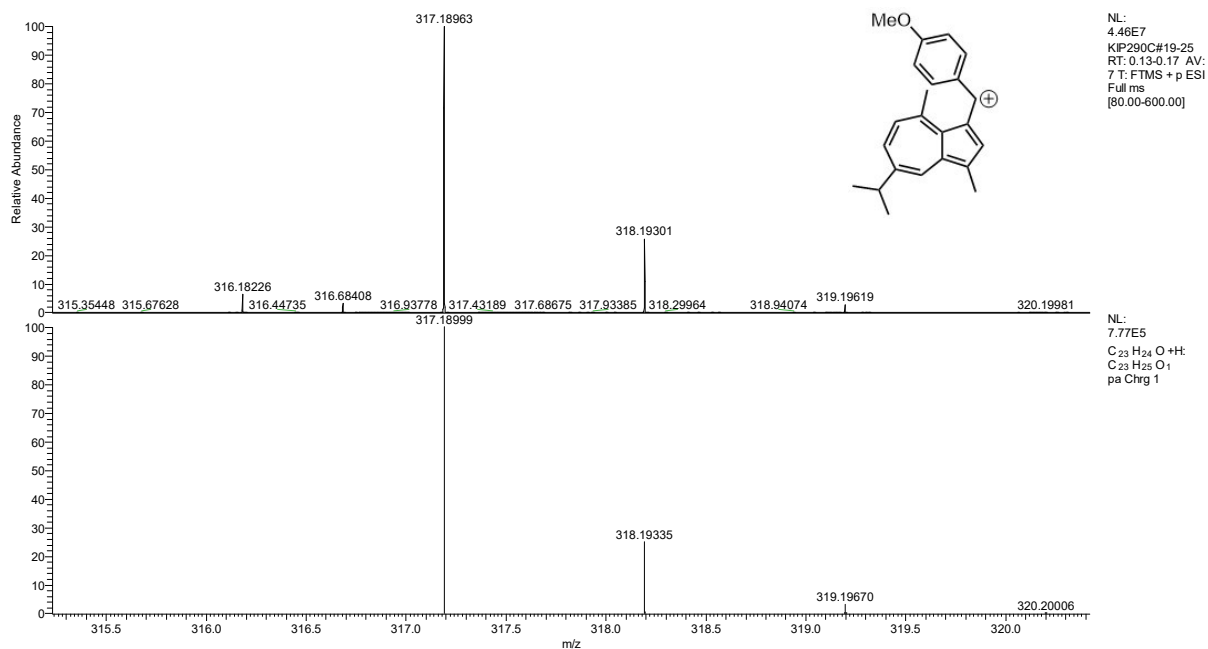

Figure S138. HRMS picture of compound **2b**.

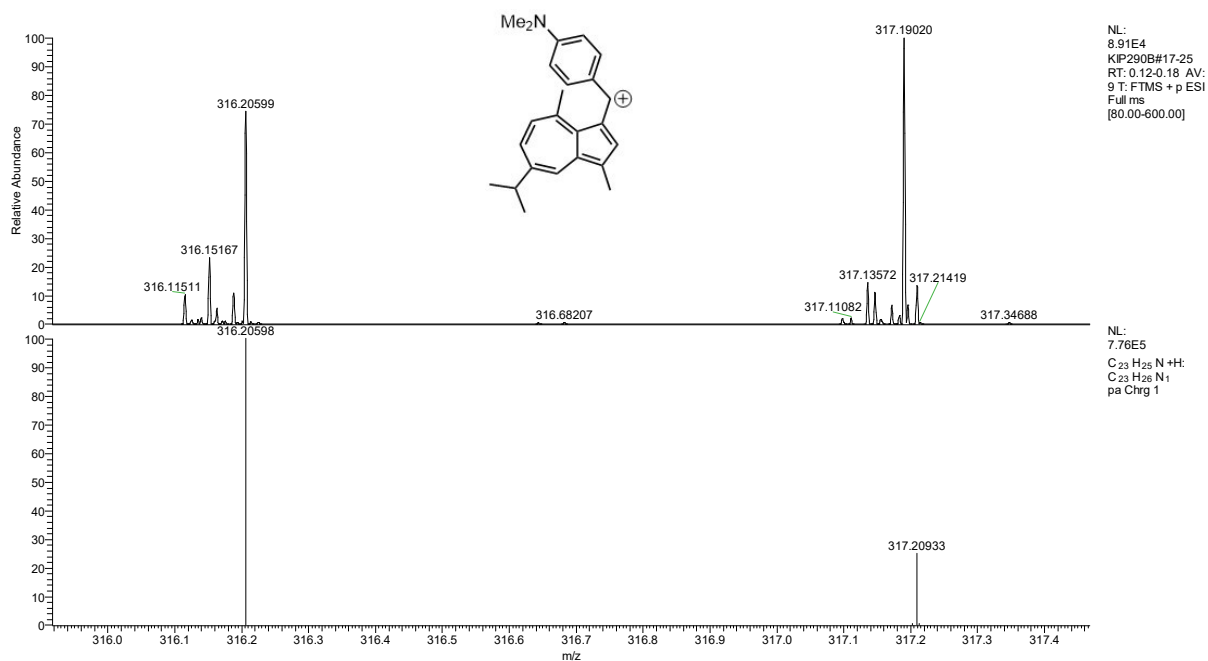

Figure S139. HRMS picture of compound [2c](#).

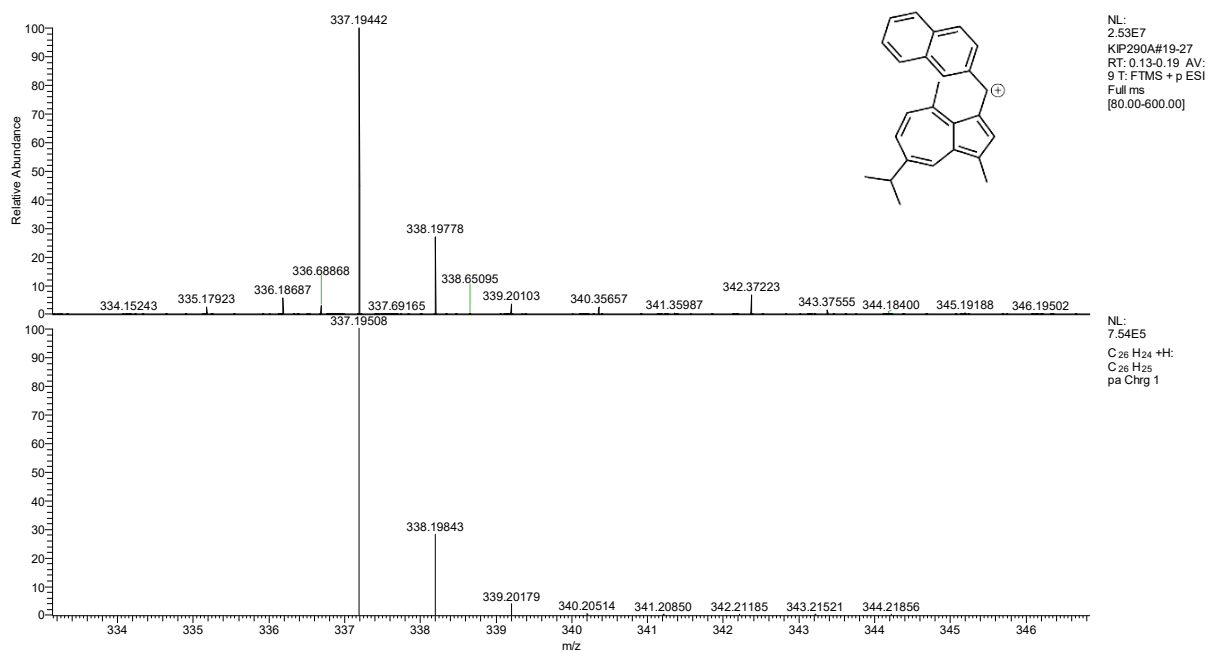

Figure S140. HRMS picture of compound [2d](#).

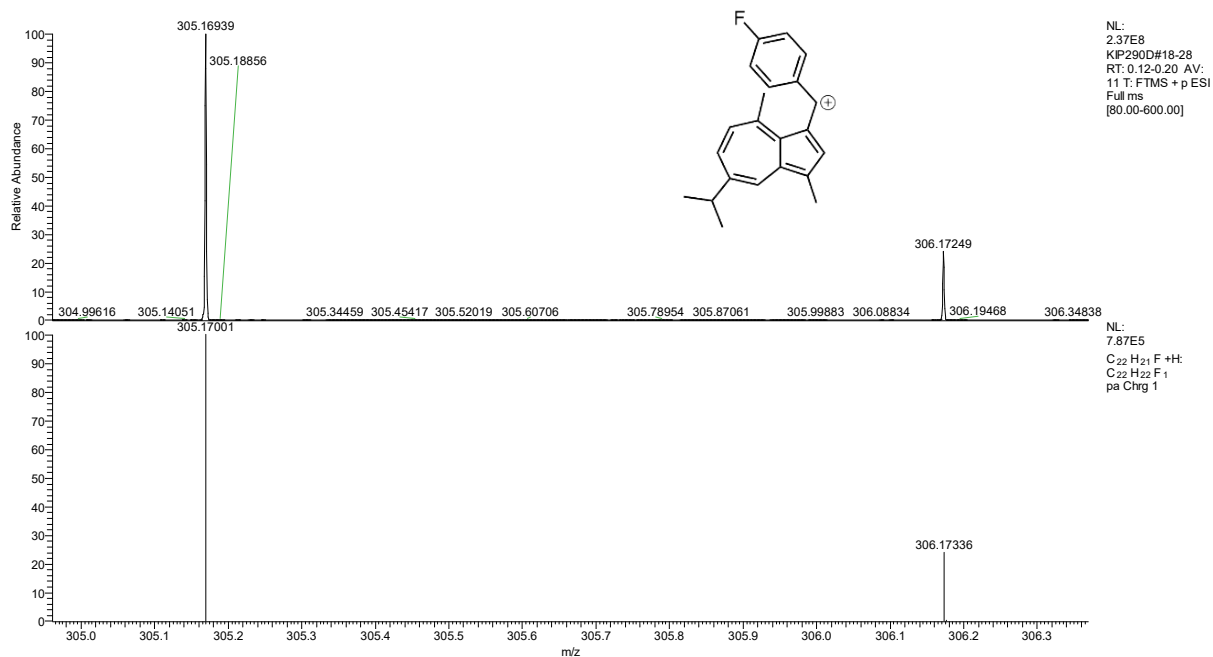

Figure S141. HRMS picture of compound [2e](#).

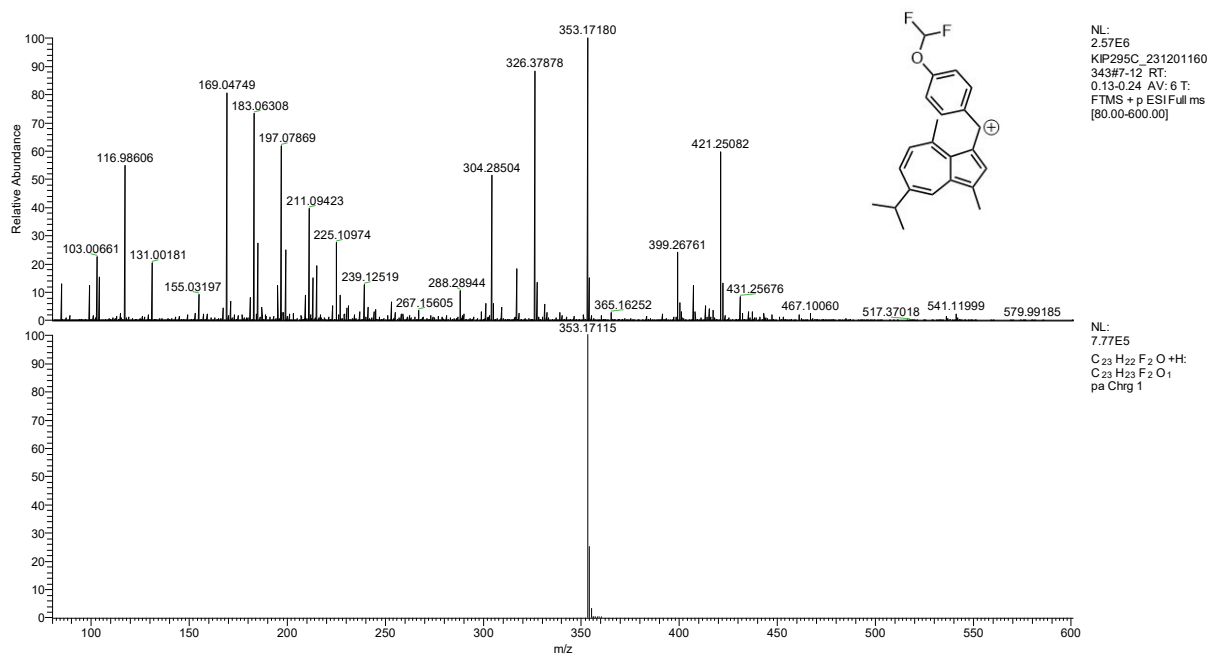

Figure S142. HRMS picture of compound [2f](#).

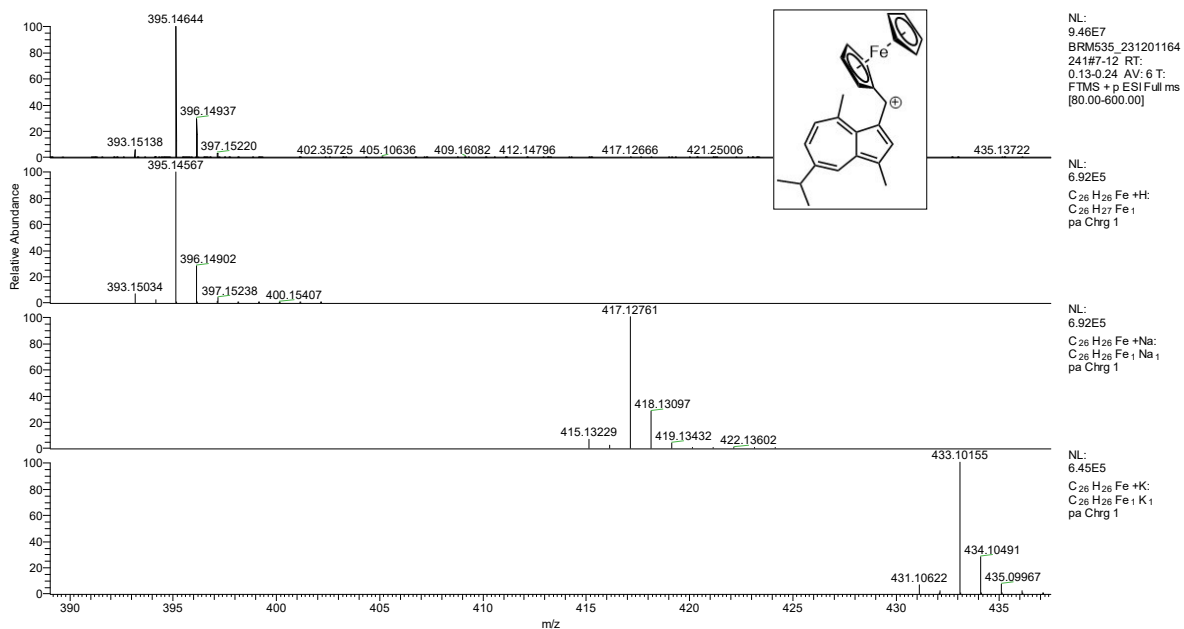

Figure S143. HRMS picture of compound [2g](#).

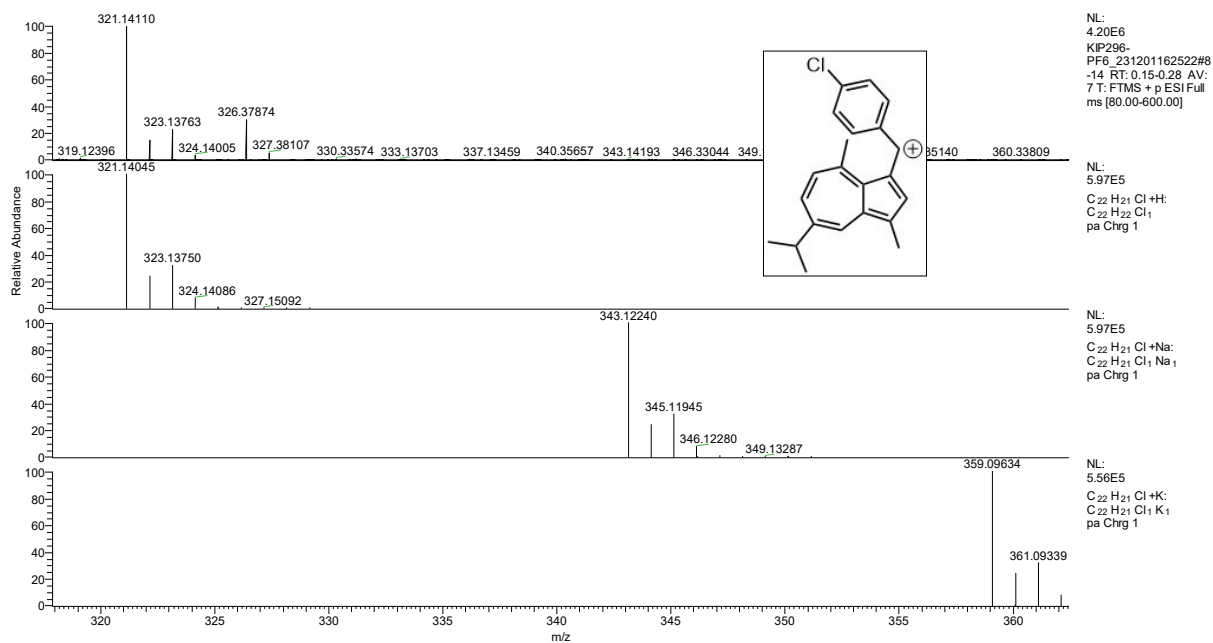

Figure S144. HRMS picture of compound [2h](#).



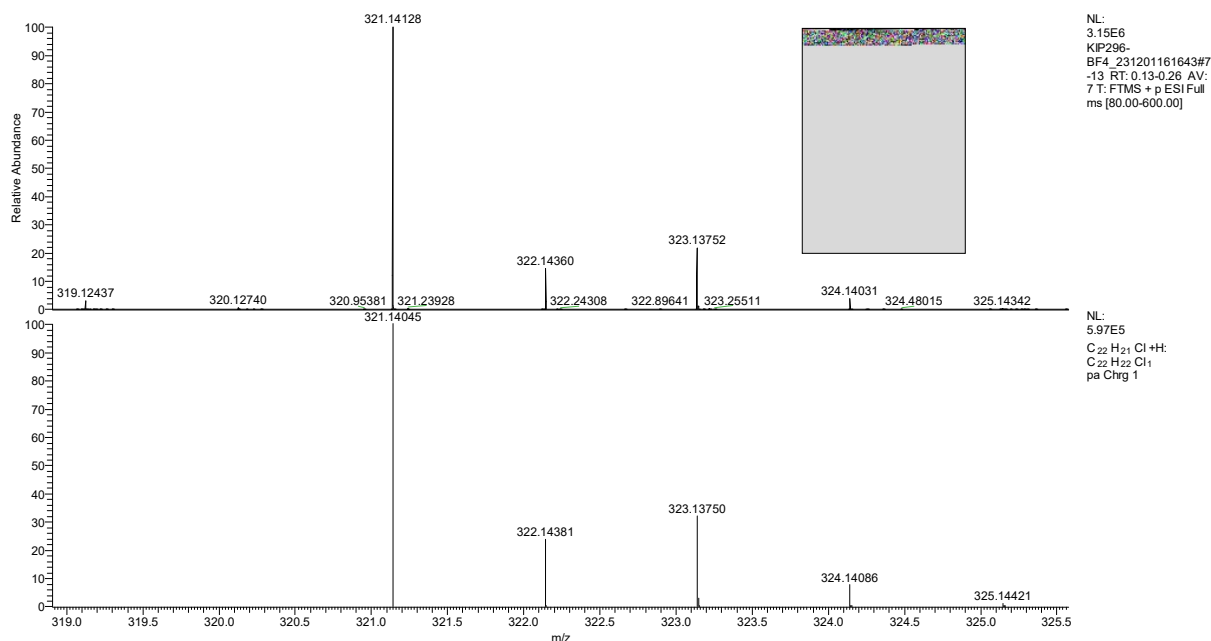

Figure S145. HRMS picture of compound [2h'](#).

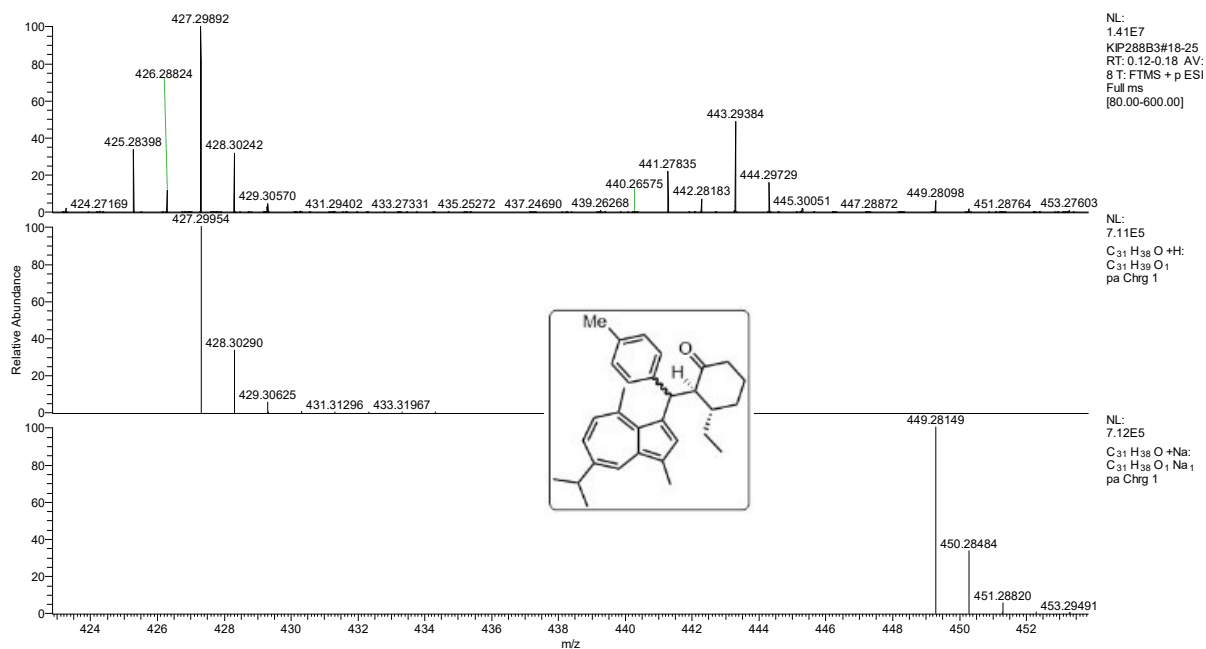

Figure S146. HRMS picture of compound [5aa/diastereomer 1](#).

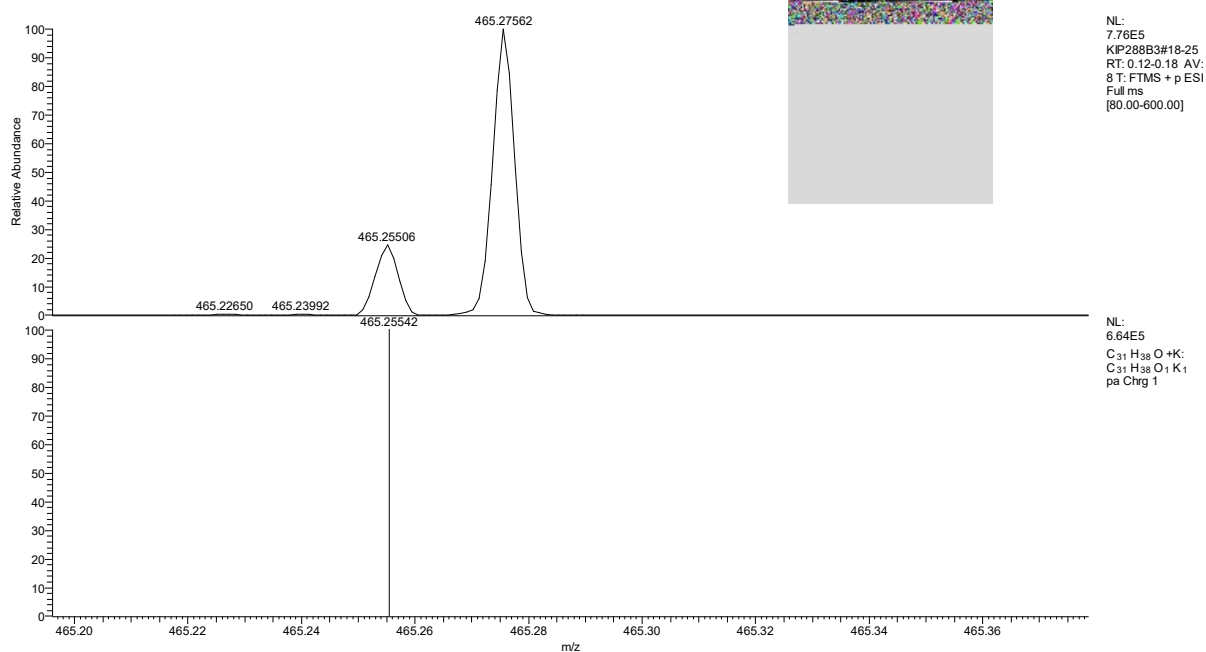

Figure S147. HRMS picture of compound [5aa/diastereomer 1](#) (enlarged).

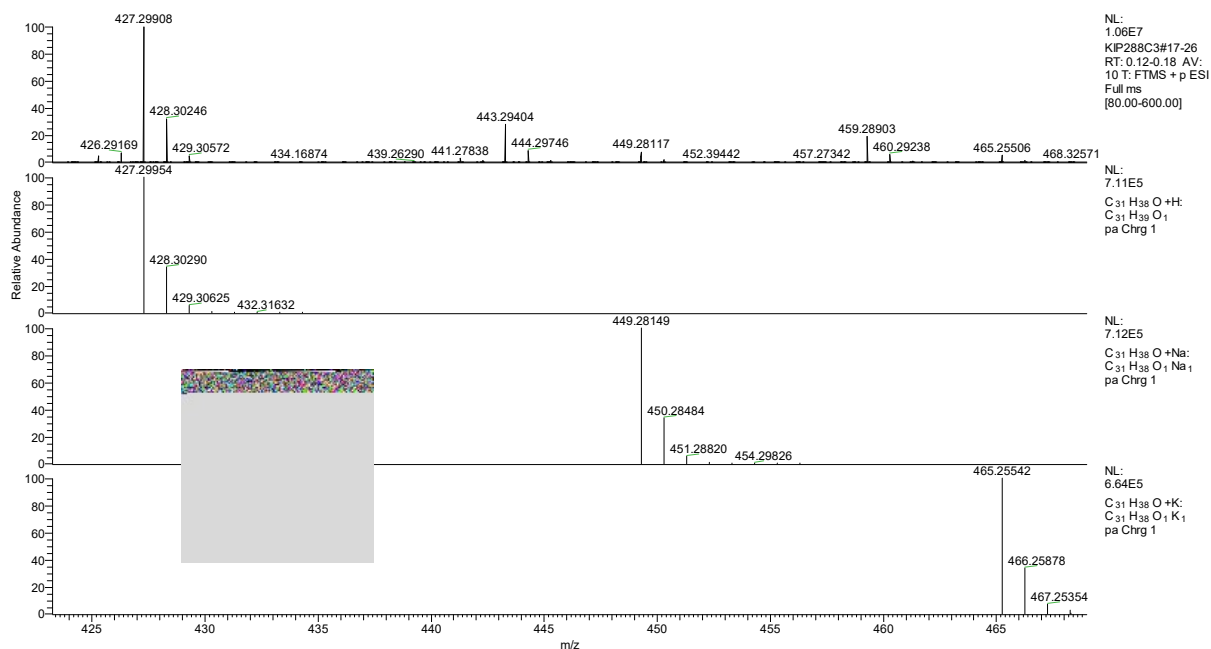

Figure S148. HRMS picture of compound [5aa/diastereomer 2](#).

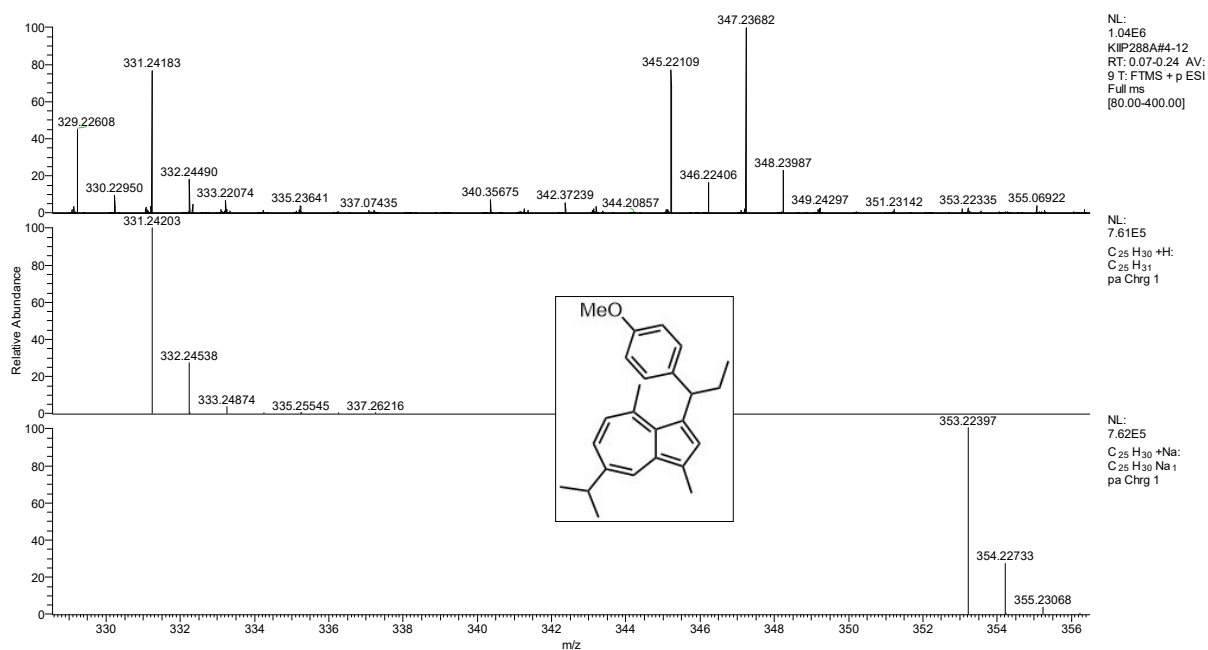

Figure S149. HRMS picture of compound [6a](#).

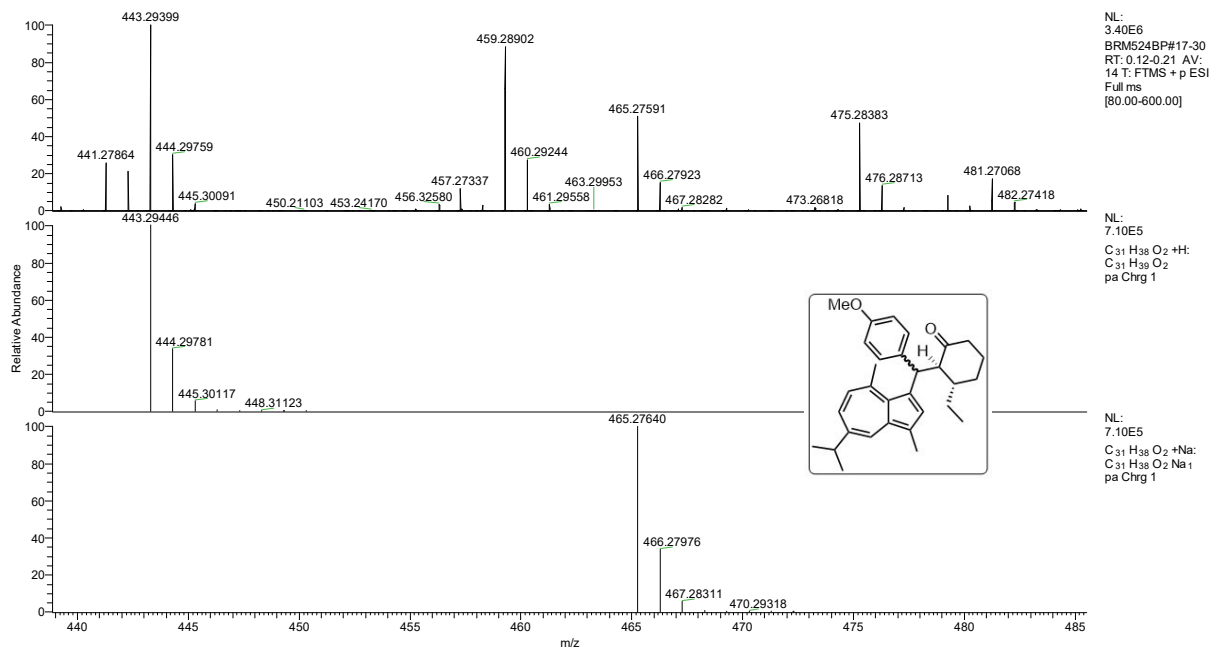

Figure S150. HRMS picture of compound [5ab/diastereomer 1](#).

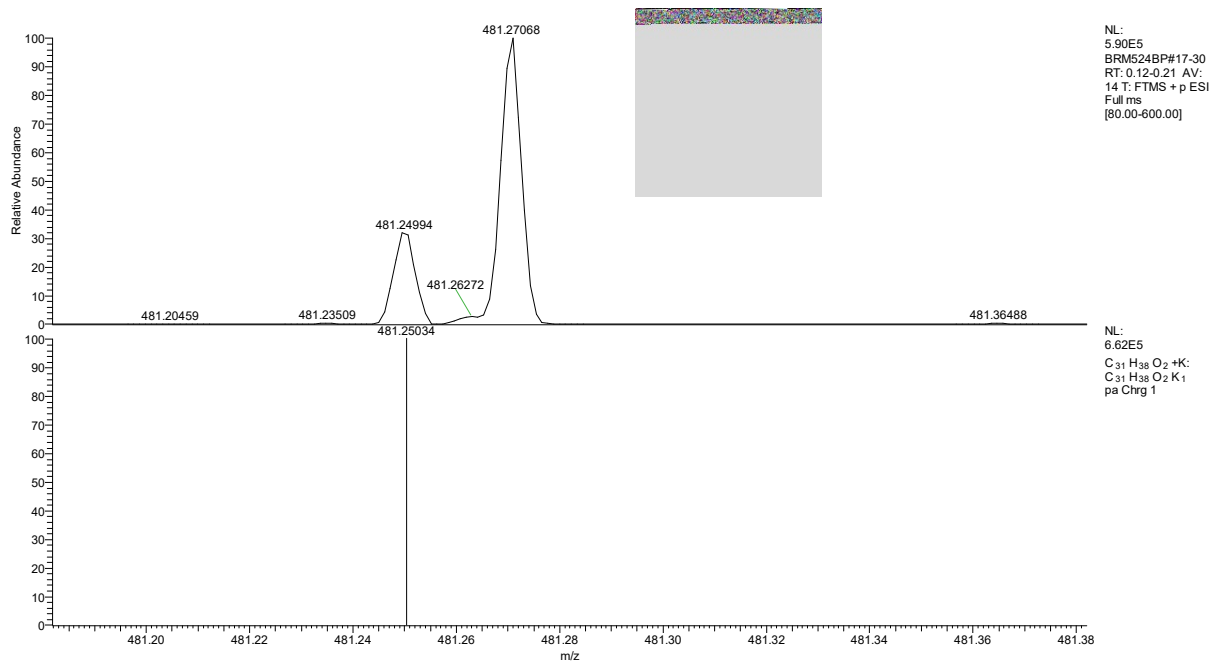

Figure S151. HRMS picture of compound [5ab/diastereomer 1](#) (enlarged).

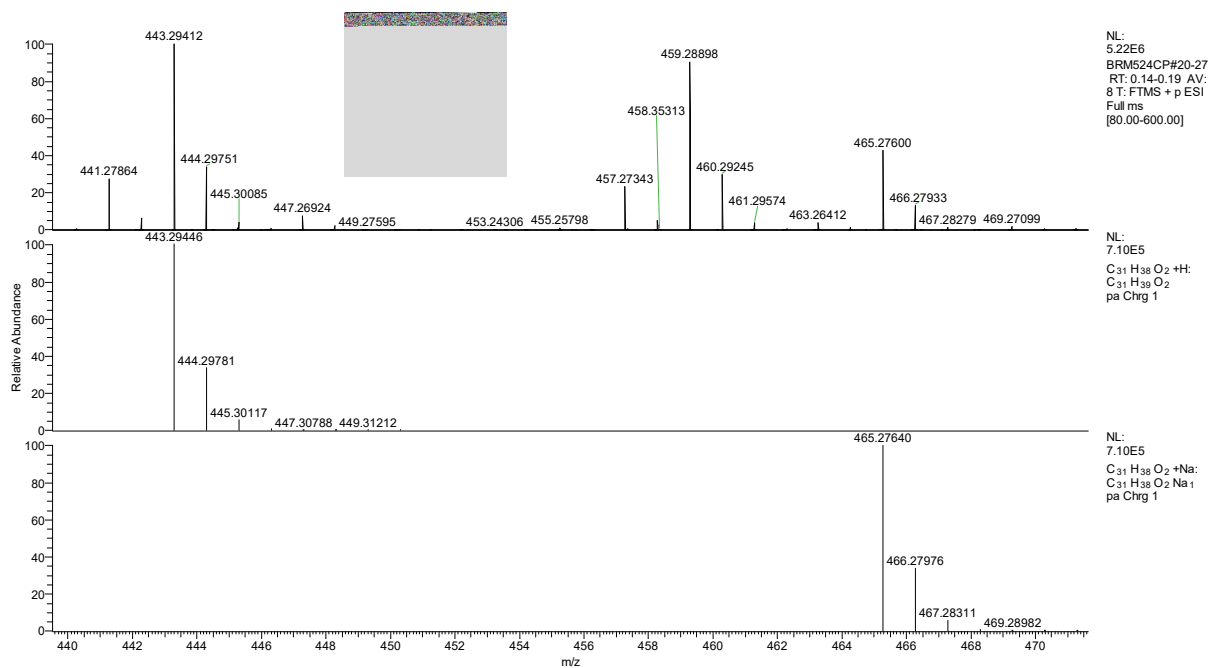

Figure S152. HRMS picture of compound [5ab/diastereomer 2](#).

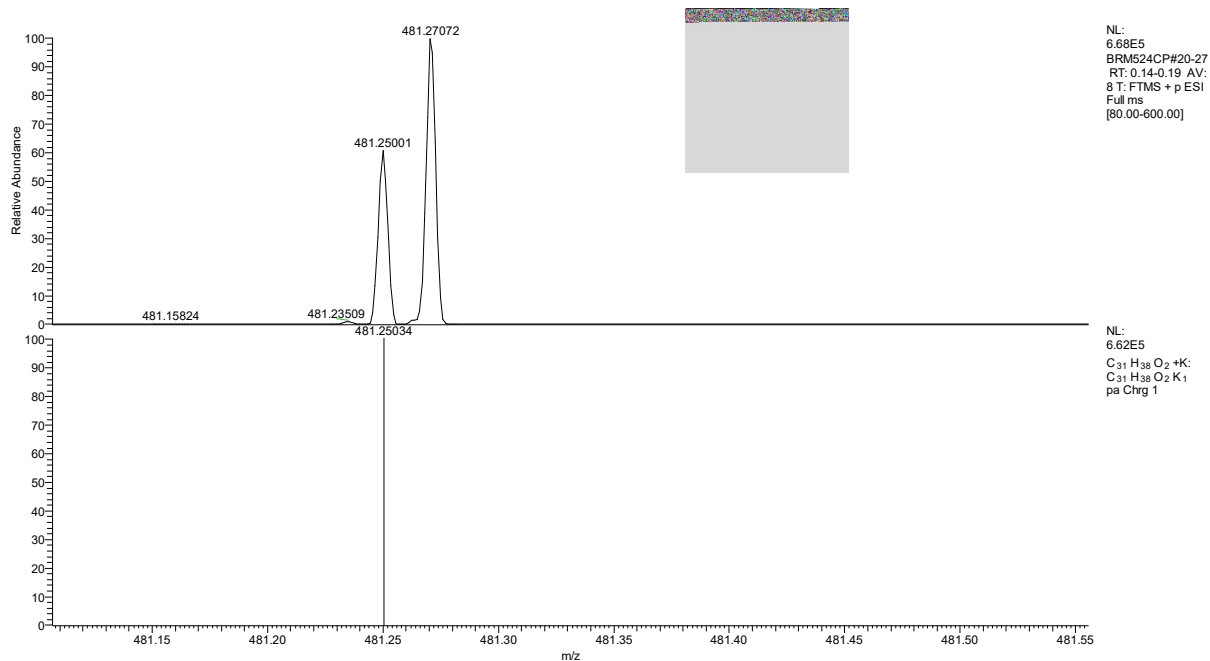

Figure S153. HRMS picture of compound [5ab/diastereomer 2](#) (enlarged).

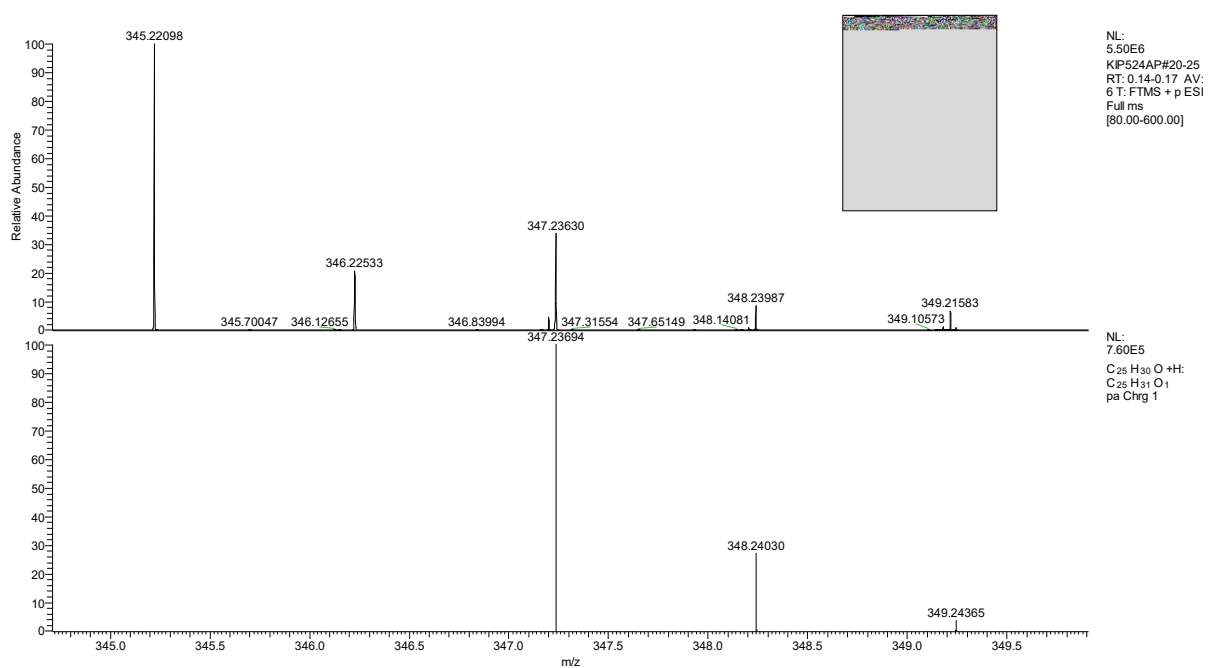

Figure S154. HRMS picture of compound [6b](#).

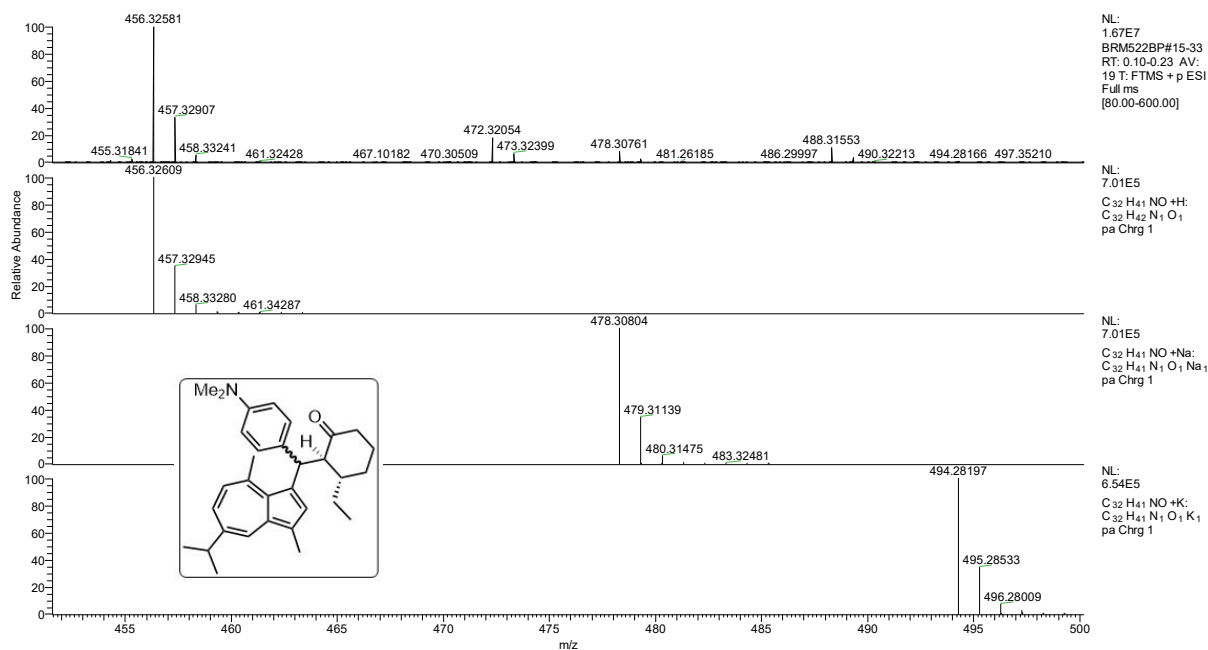

Figure S155. HRMS picture of compound [5ac/diastereomer 1](#).

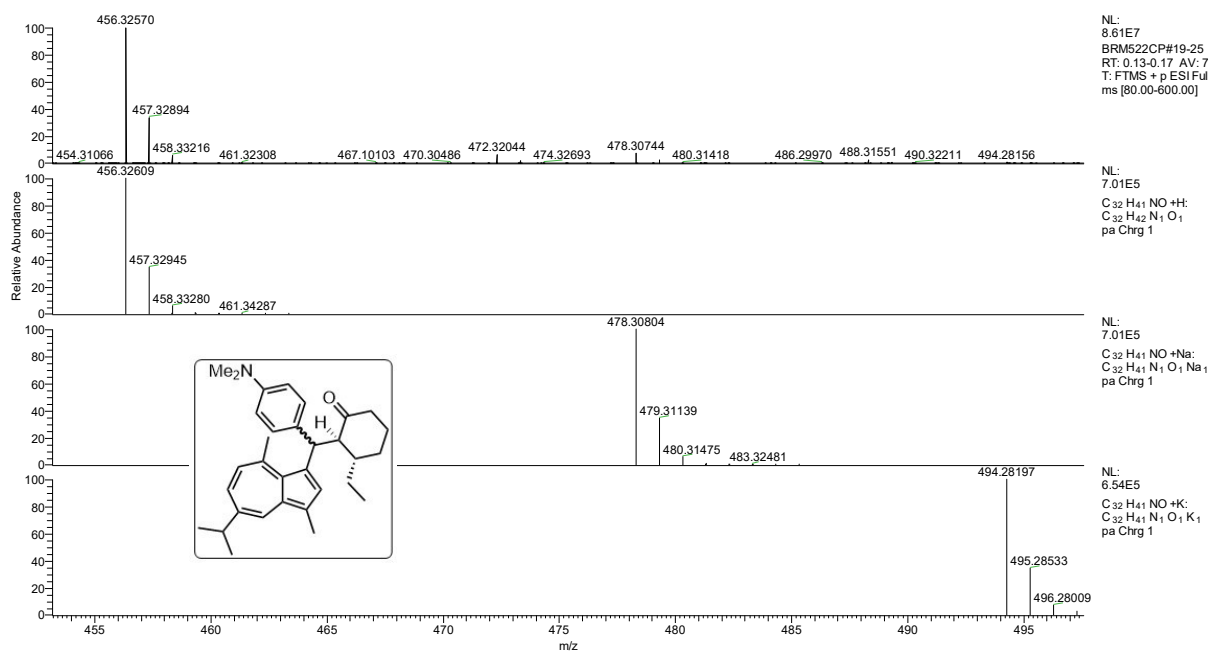

Figure S156. HRMS picture of compound [5ac/diastereomer 2](#).

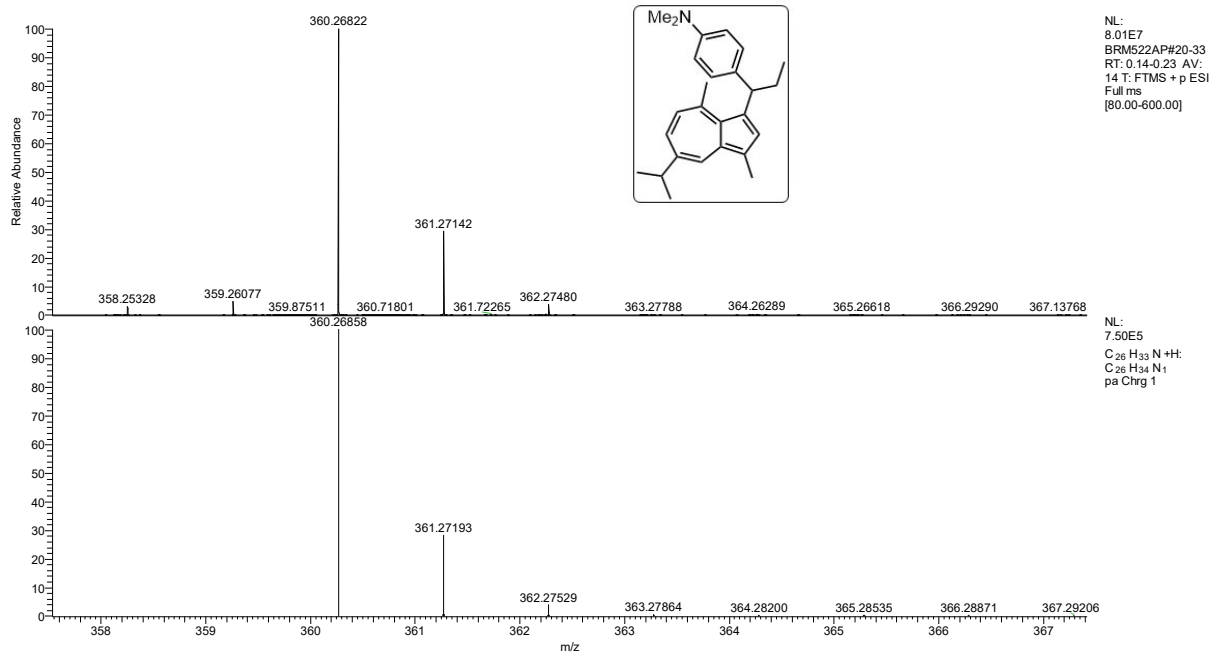

Figure S157. HRMS picture of compound [6c](#).

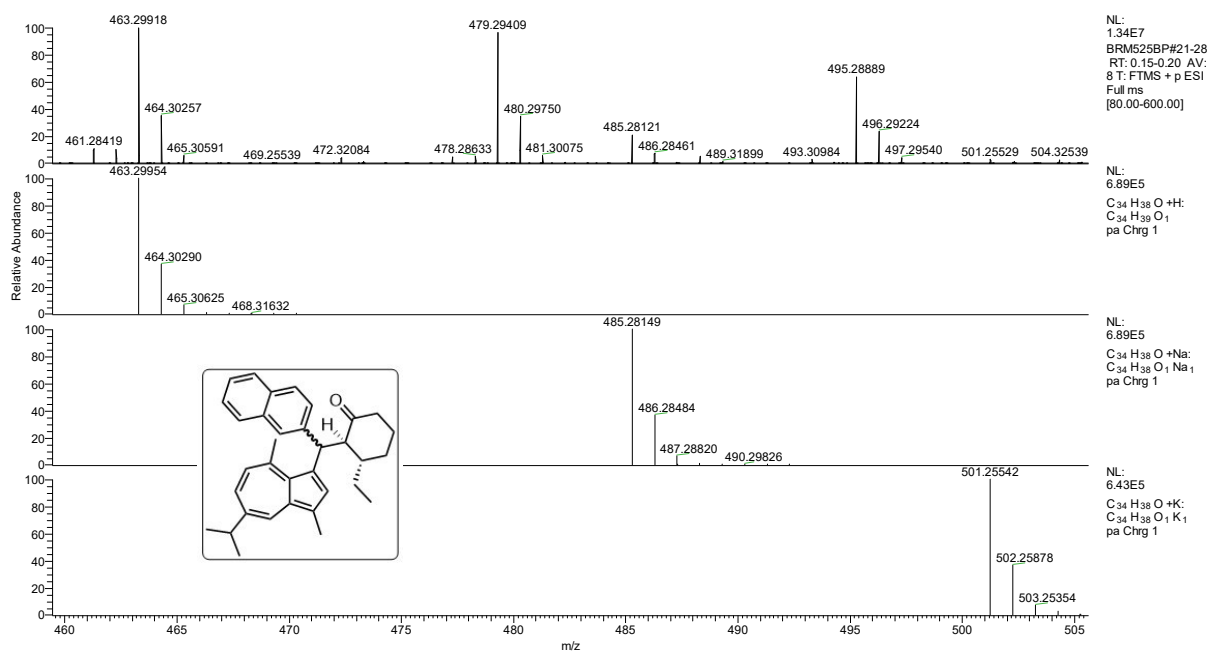

Figure S158. HRMS picture of compound [5ad/diastereomer 1](#).



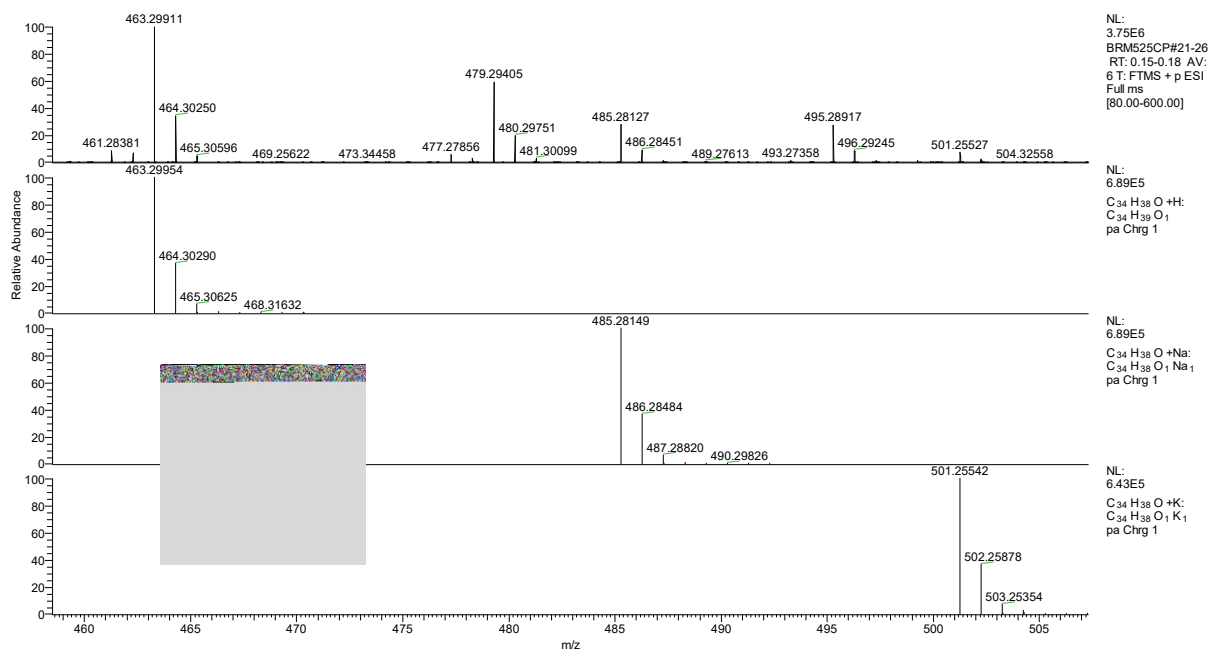

Figure S159. HRMS picture of compound [5ad/diastereomer 2](#).

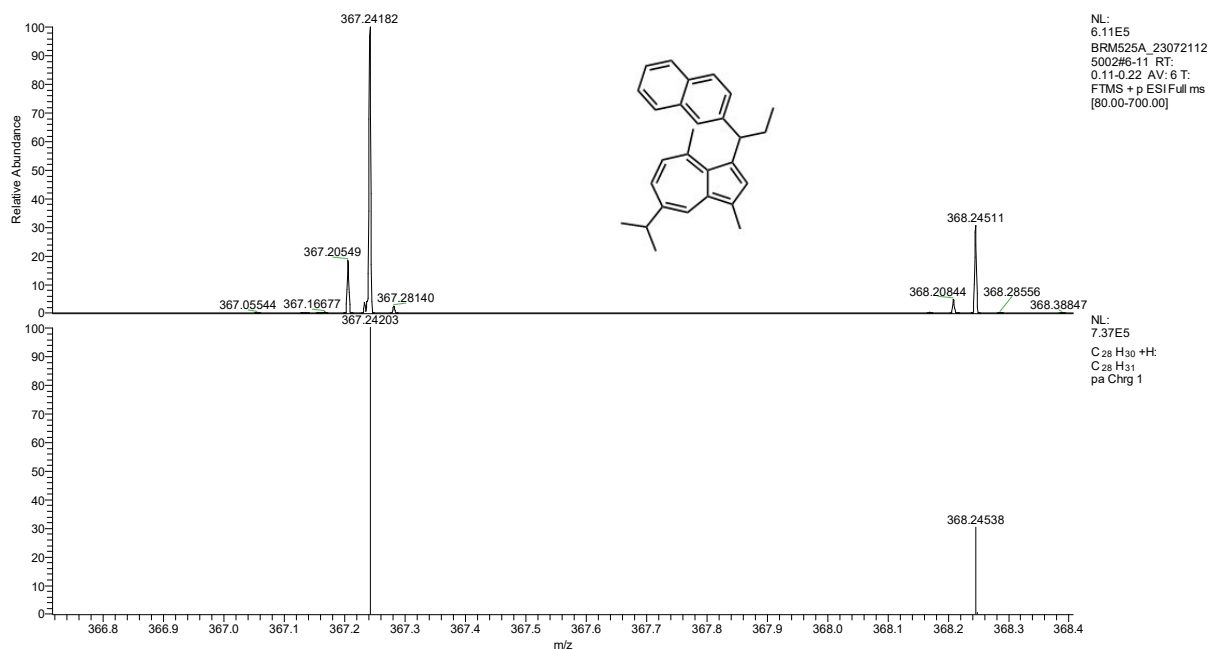

Figure S160. HRMS picture of compound [6d](#).

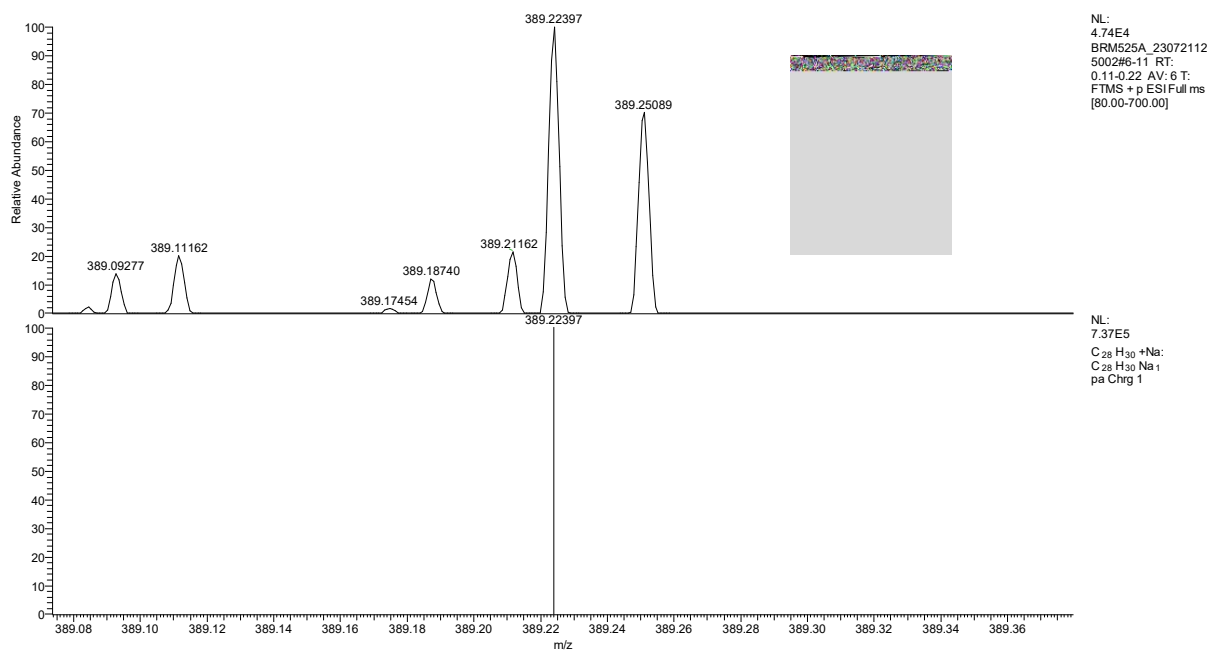

Figure S161. HRMS picture of compound [6d](#) (Na<sup>+</sup> adduct).

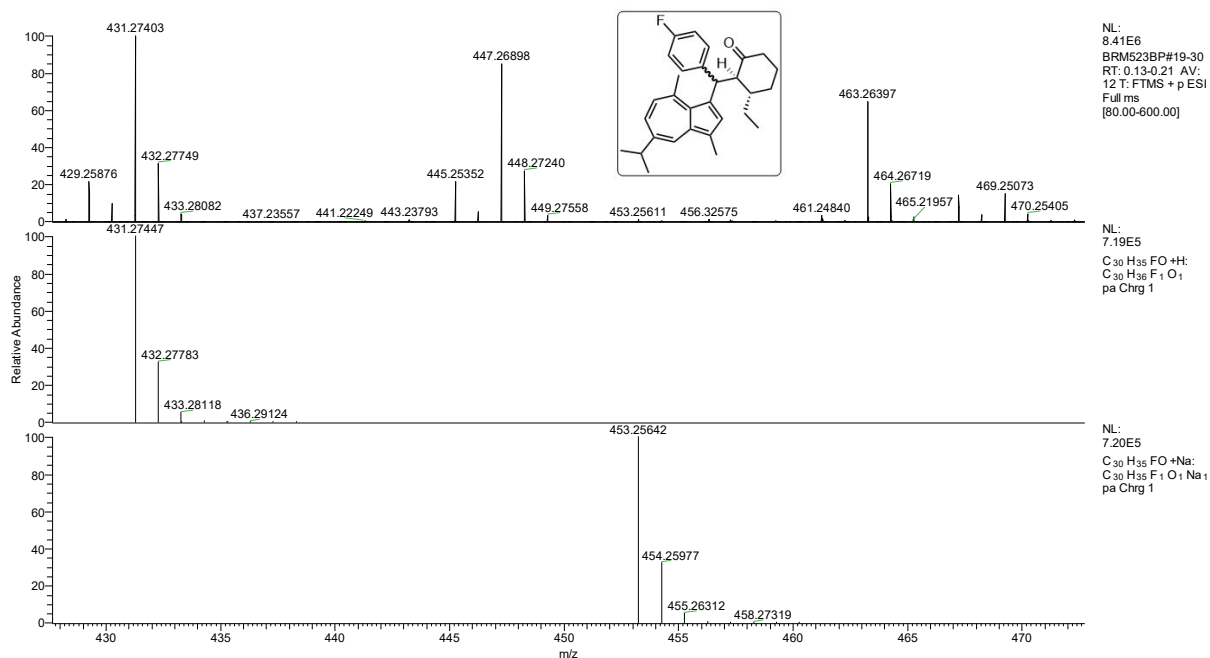

Figure S162. HRMS picture of compound [5ae/diastereomer 1](#).

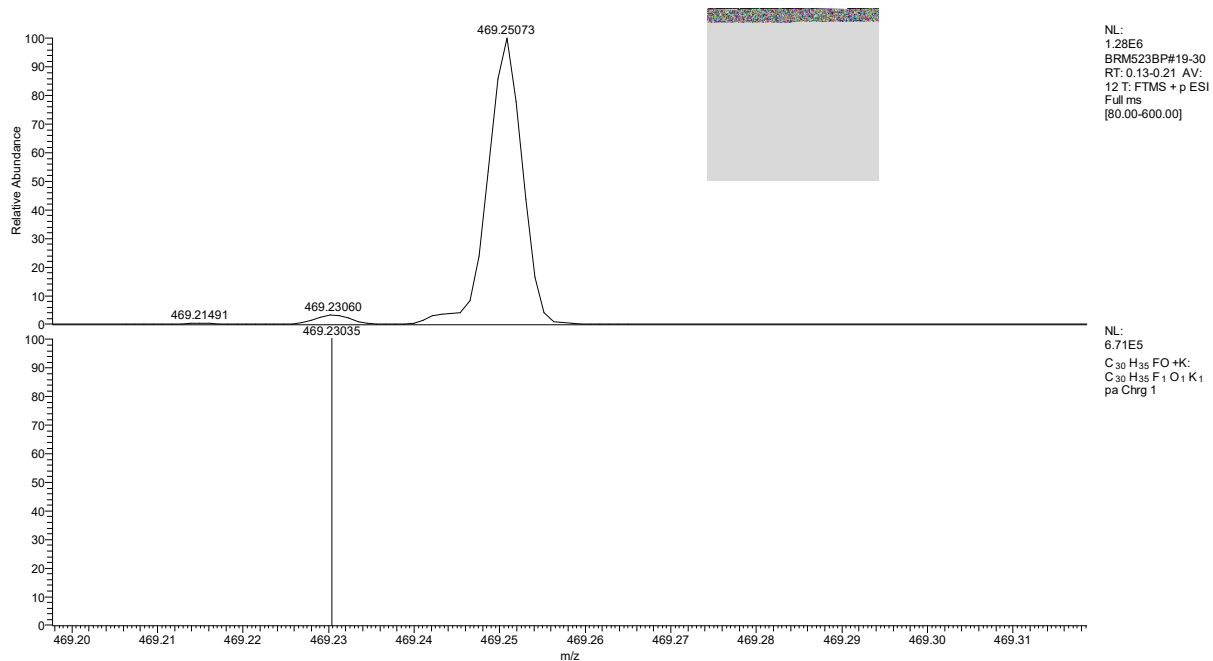

Figure S163. HRMS picture of compound [5ae/diastereomer 1](#) (enlarged).

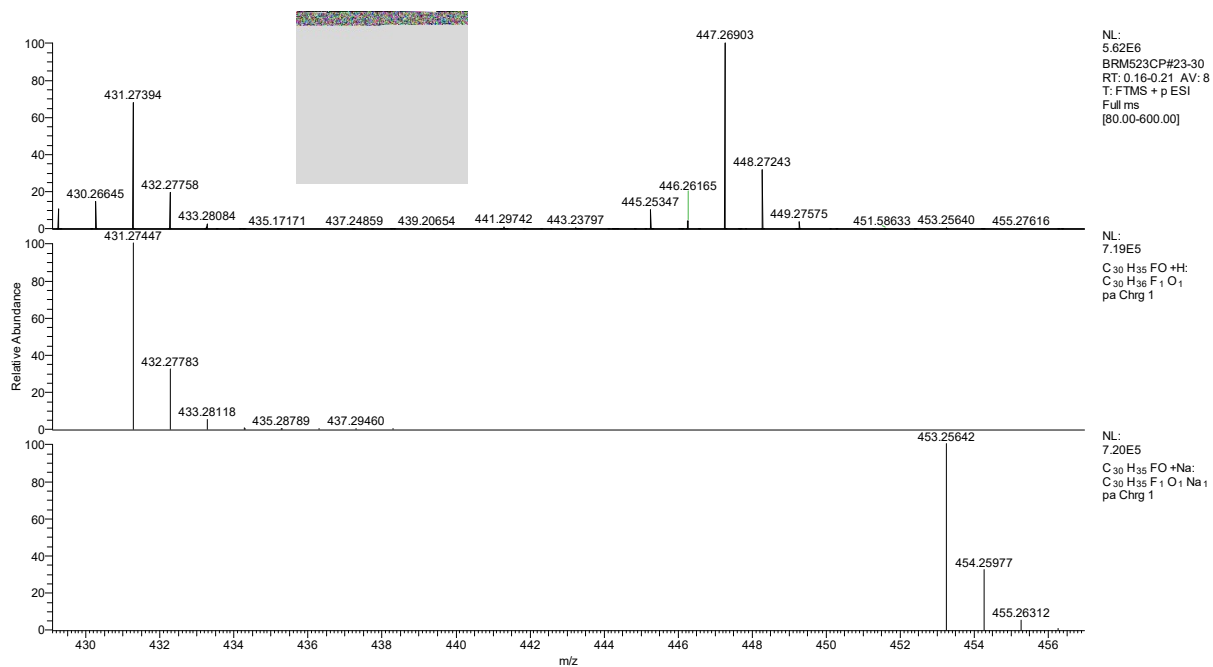

Figure S164. HRMS picture of compound [5ae/diastereomer 2](#).

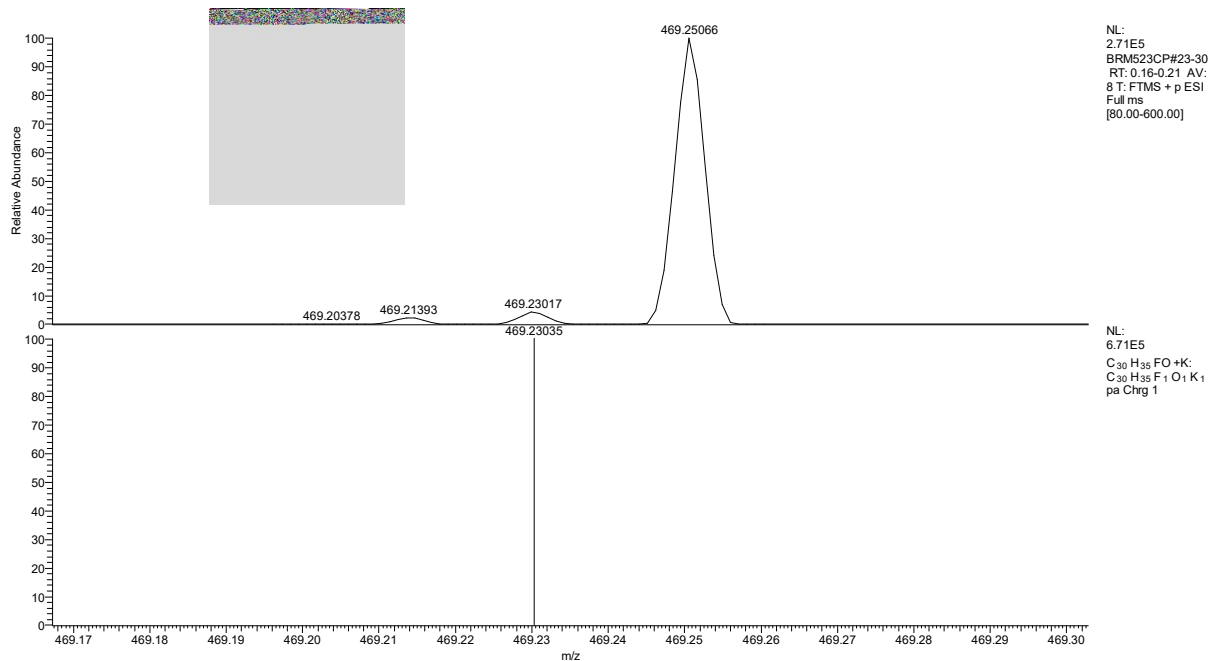

Figure S165. HRMS picture of compound [5ae/diastereomer 2](#) (enlarged).

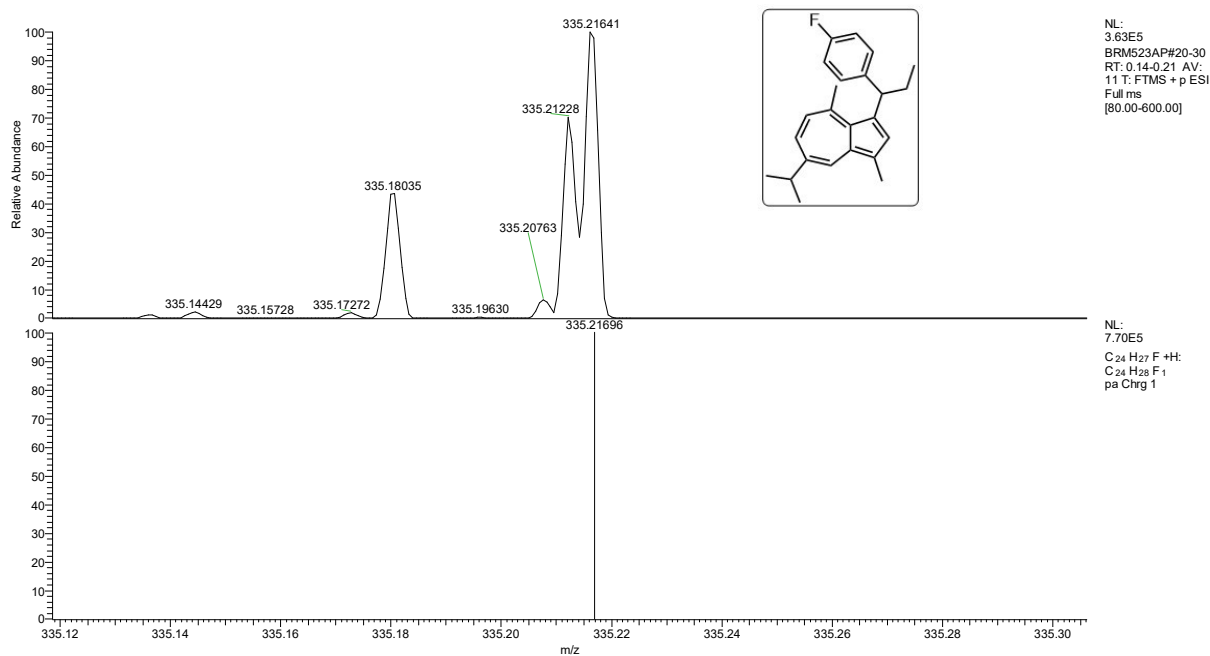

Figure S166. HRMS picture of compound [6e](#).

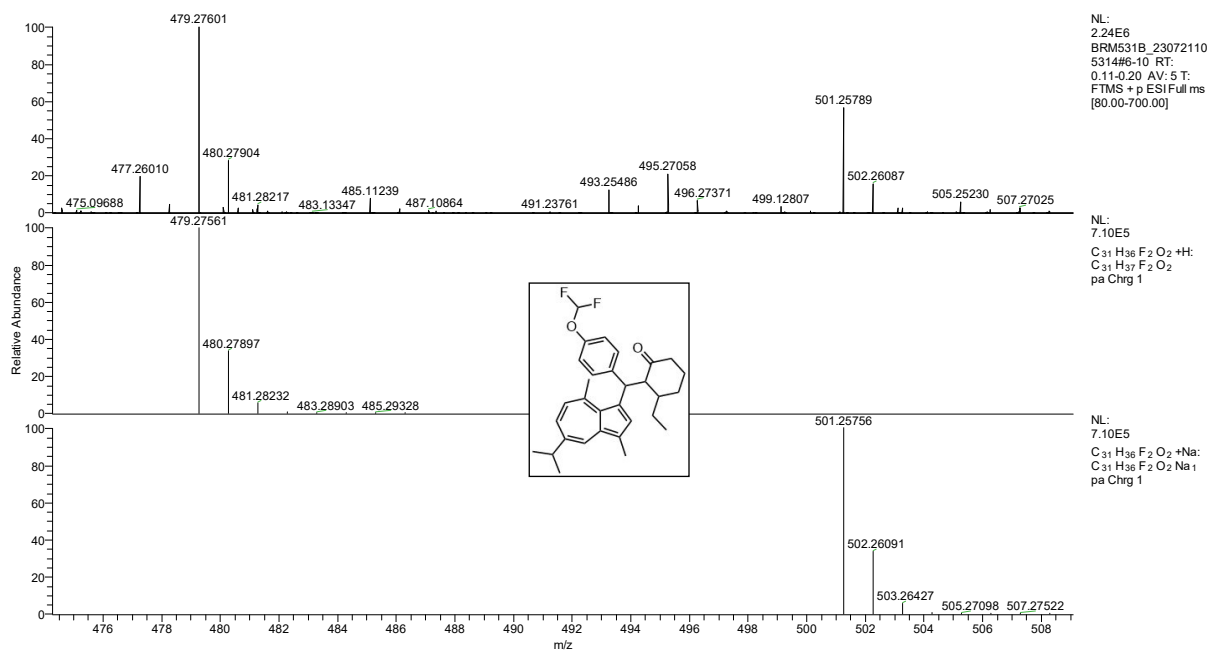

Figure S167. HRMS picture of compound [5af/diastereomer 1](#).

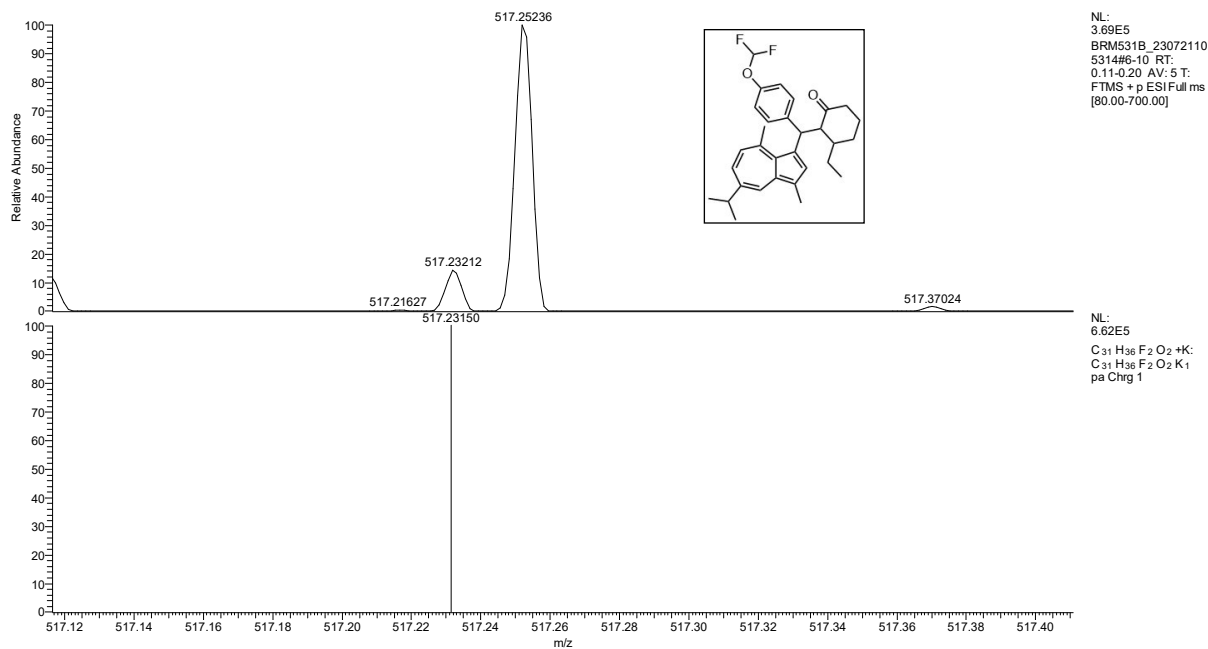

Figure S168. HRMS picture of compound [5af/diastereomer 1](#) (K<sup>+</sup> adduct).

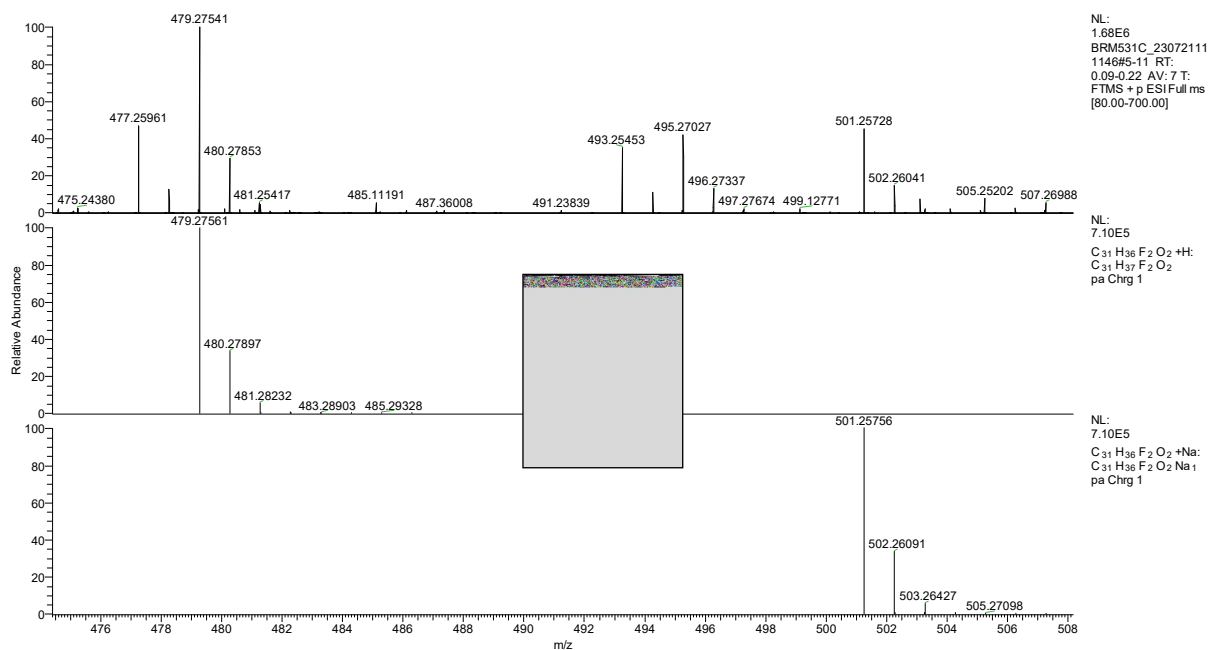

Figure S169. HRMS picture of compound [5af/diastereomer 2](#).

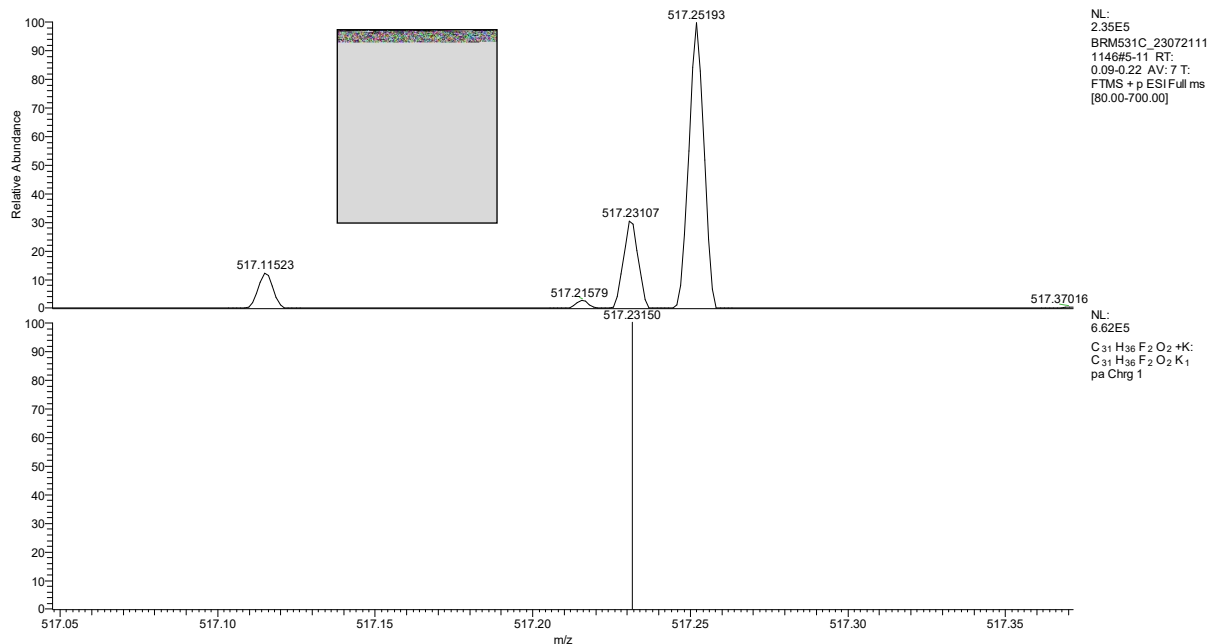

Figure S170. HRMS picture of compound [5af/diastereomer 2](#) (K<sup>+</sup> adduct).

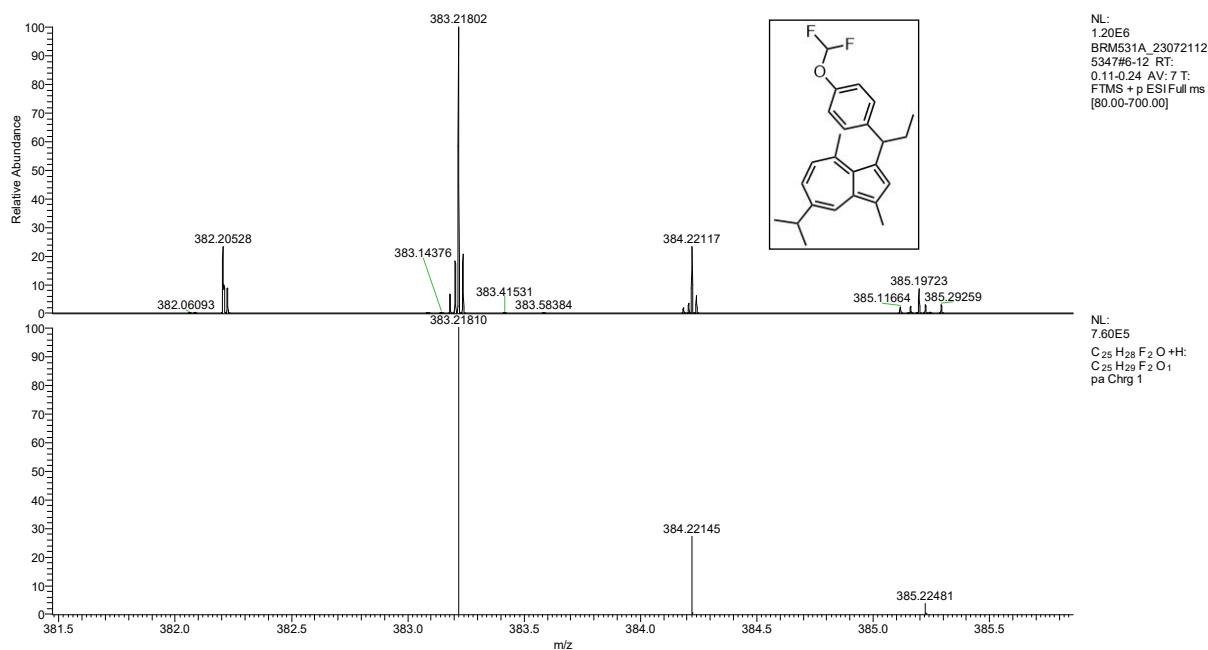

Figure S171. HRMS picture of compound [6f](#).

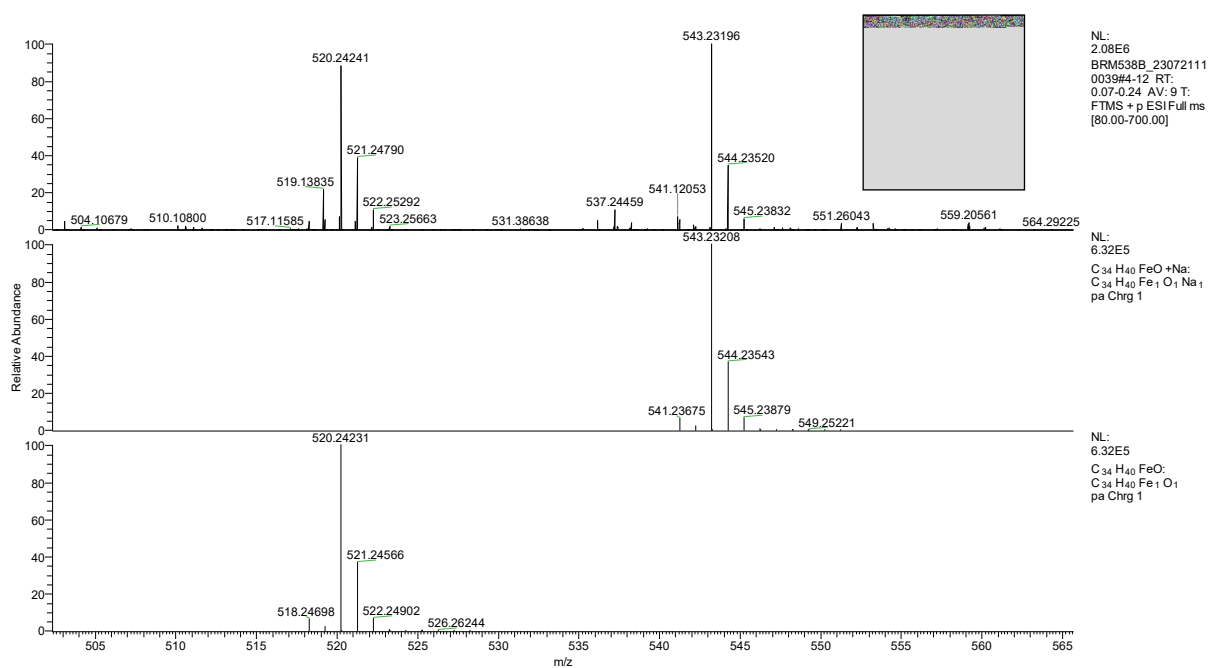

Figure S172. HRMS picture of compound [5ag/diastereomer 1](#) ( $M^+$  and  $Na^+$  adduct).



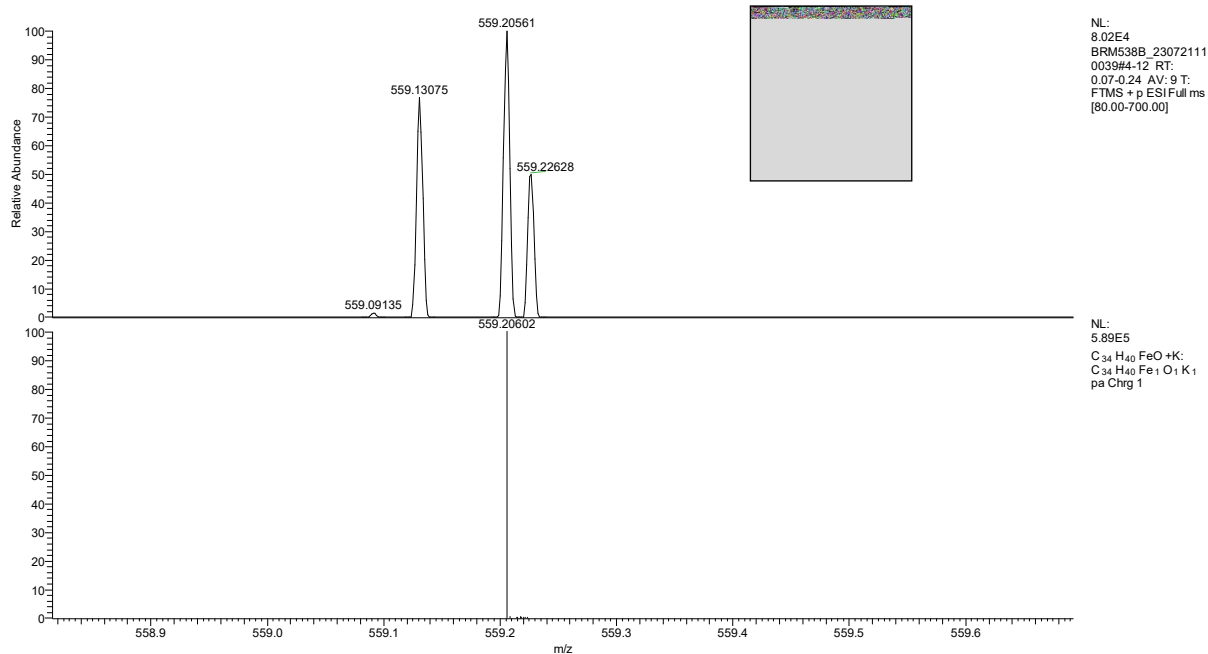

Figure S173. HRMS picture of compound [5ag/diastereomer 1](#) ( $K^+$  adduct).

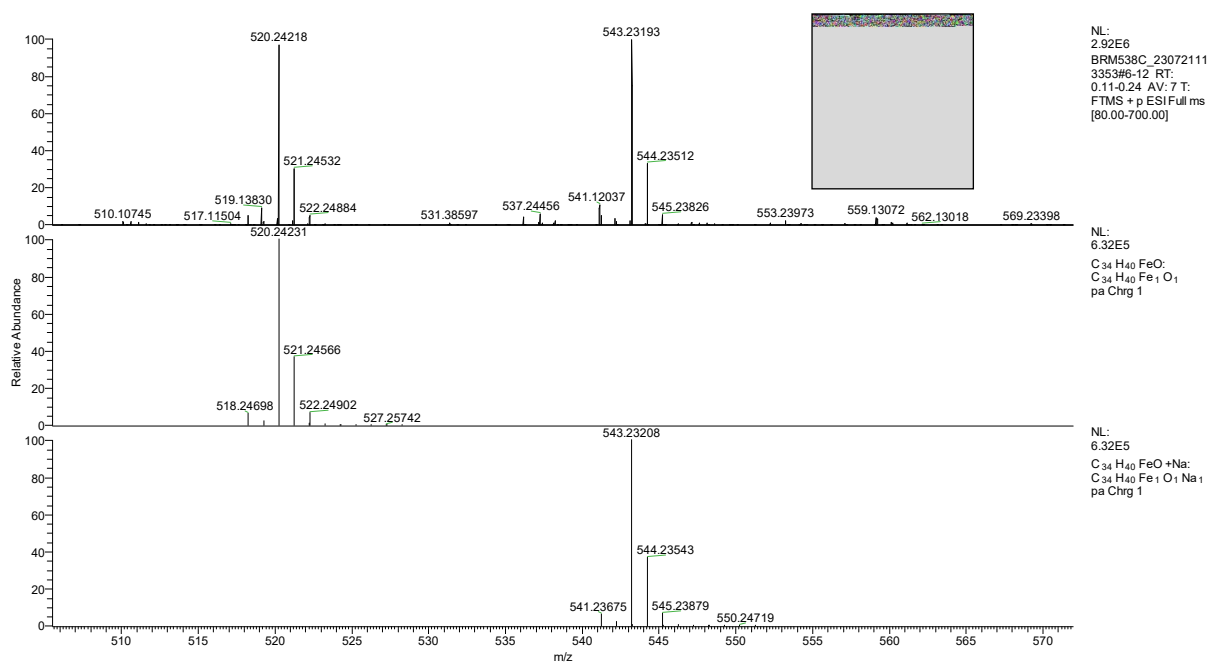

Figure S174. HRMS picture of compound [5ag/diastereomer 2](#) ( $M^+$  and  $Na^+$  adduct).

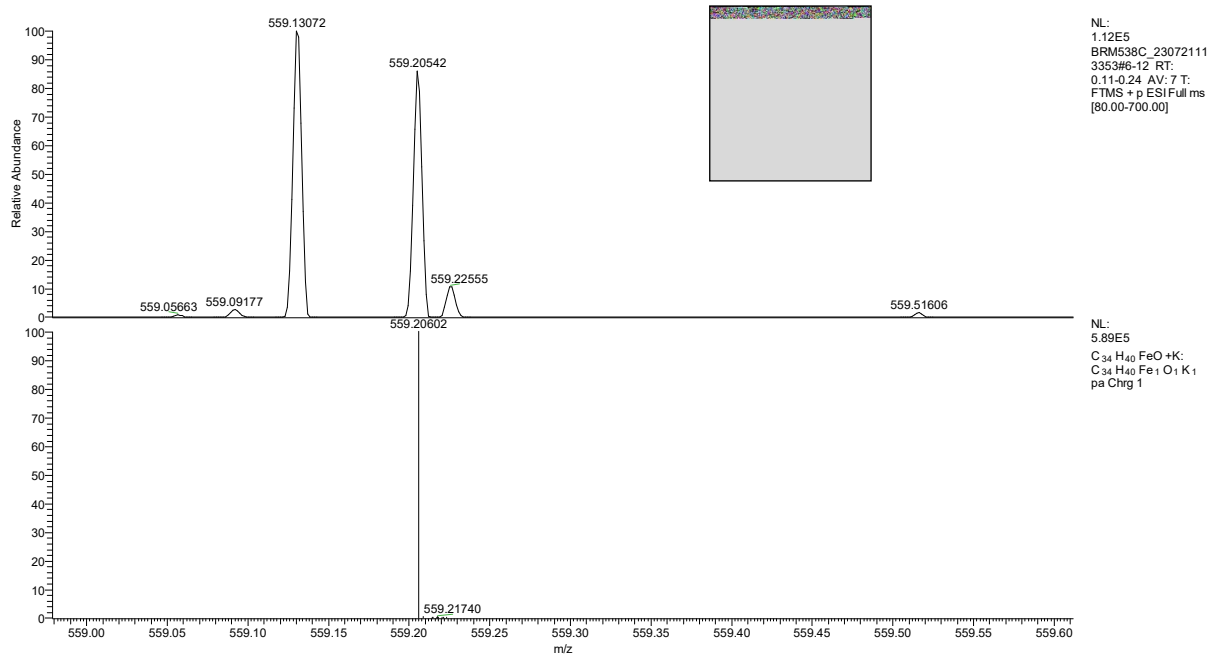

Figure S175. HRMS picture of compound [5ag/diastereomer 2](#) (K<sup>+</sup> adduct).

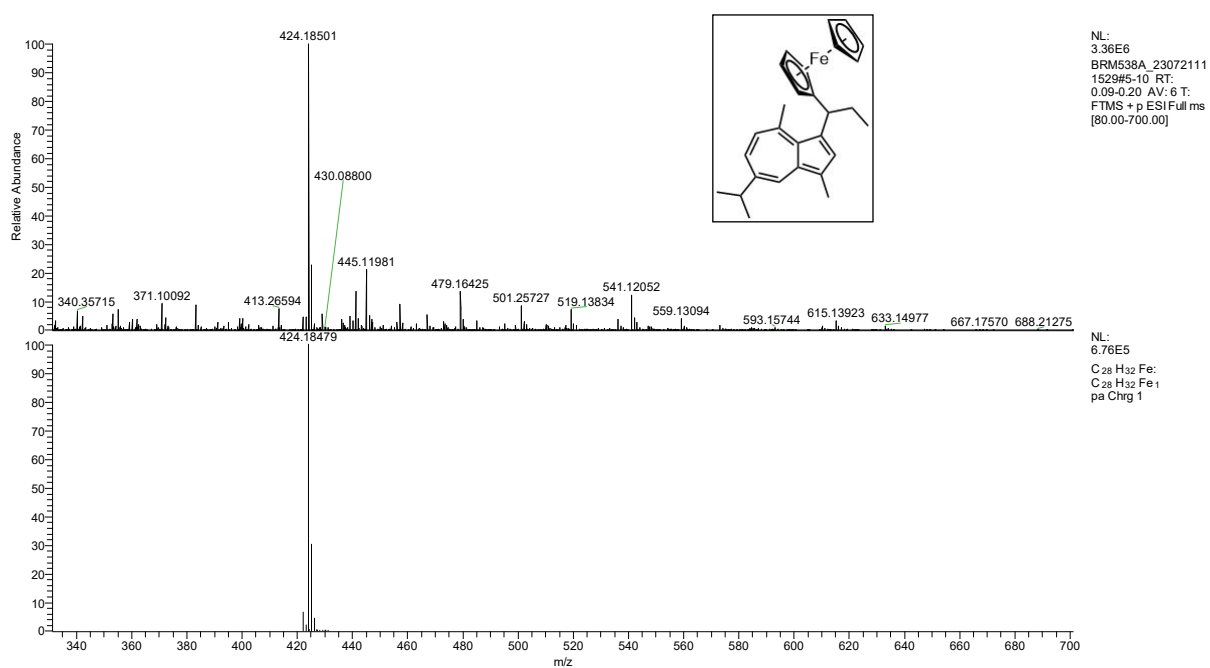

Figure S176. HRMS picture of compound [6g](#).

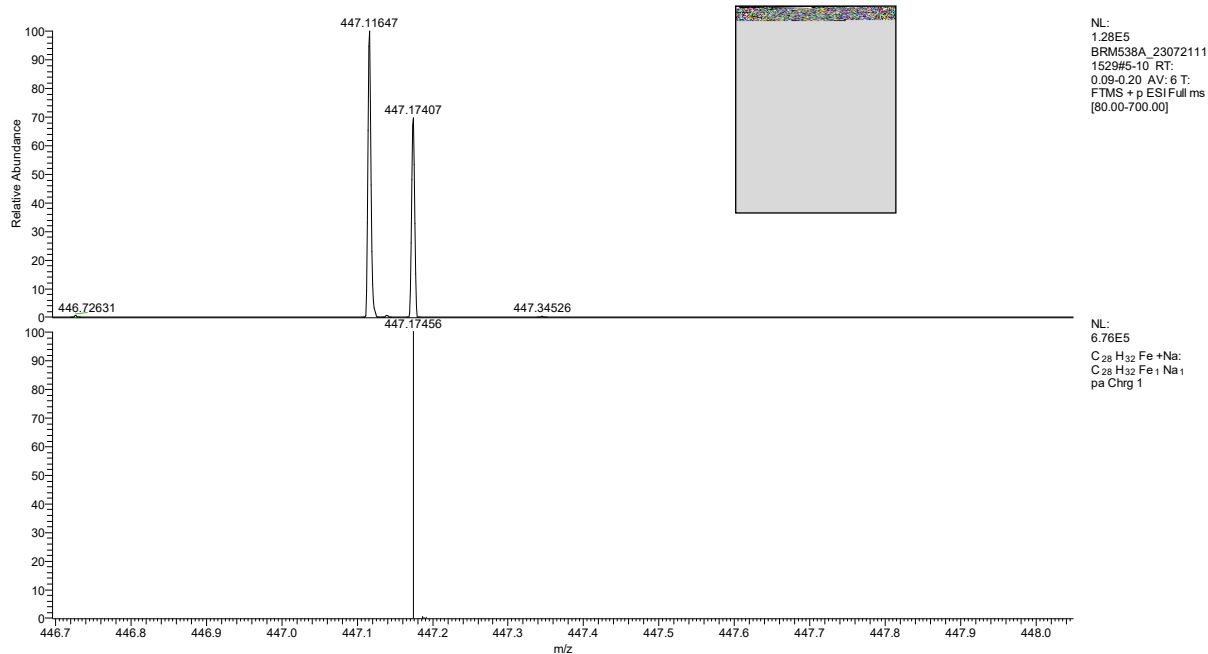

Figure S177. HRMS picture of compound **6g** (Na<sup>+</sup> adduct).

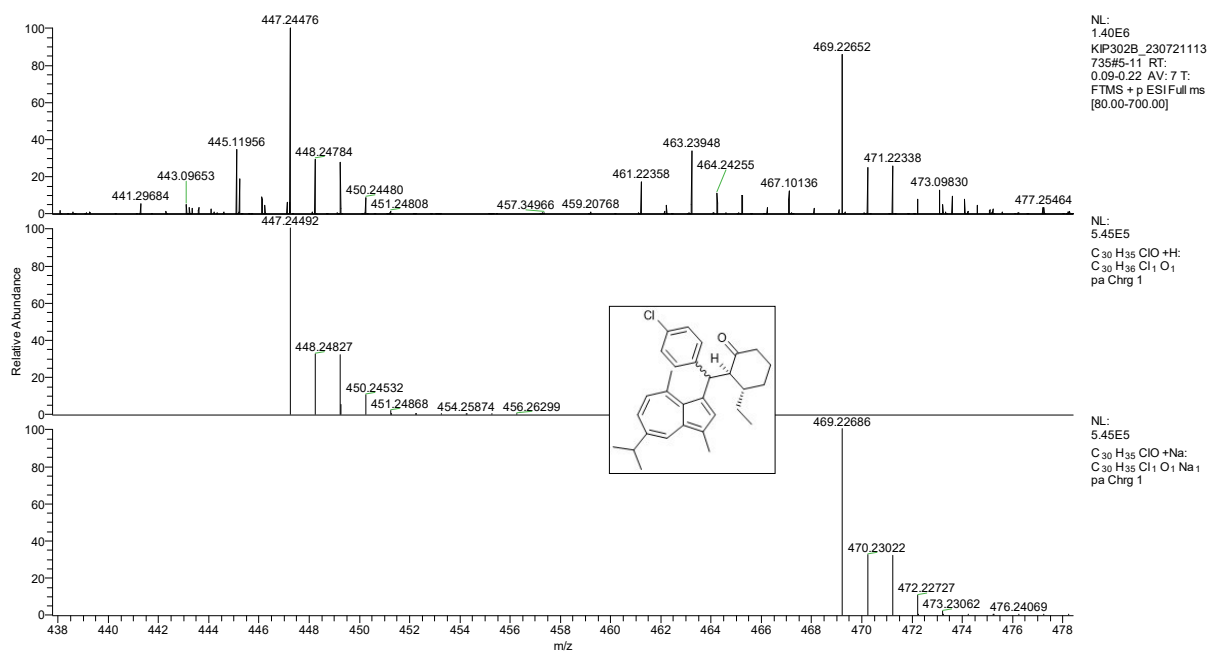

Figure S178. HRMS picture of compound **5ah/diastereomer 1**.

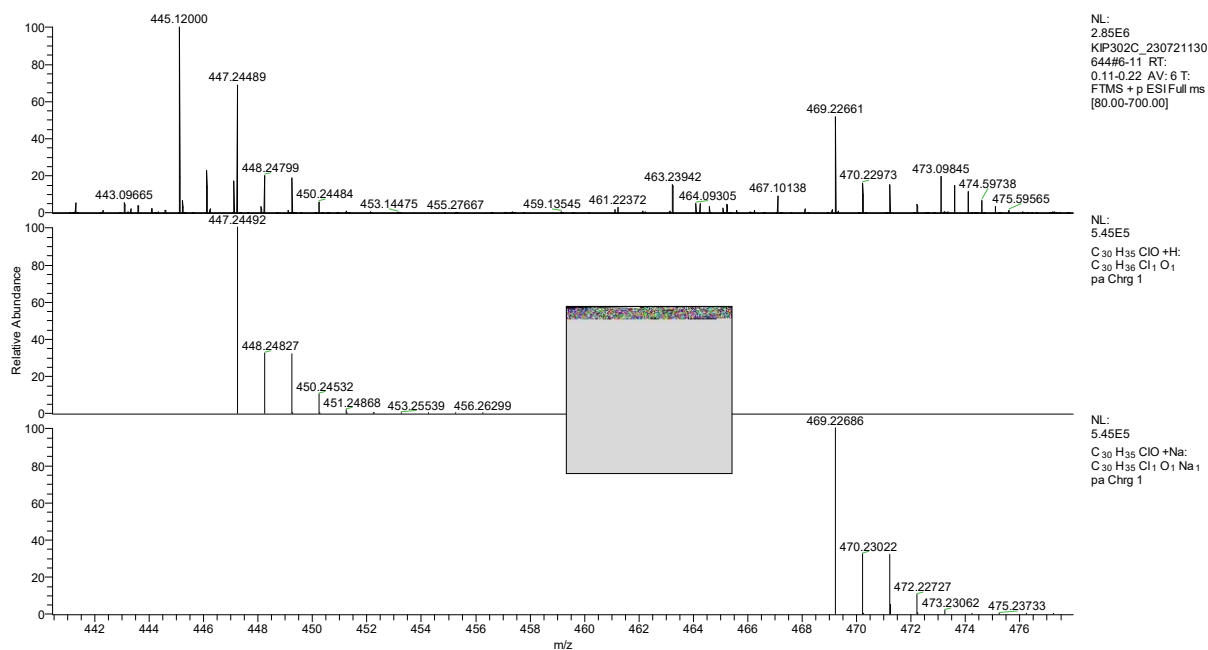

Figure S179. HRMS picture of compound [5ah/diastereomer 2](#).

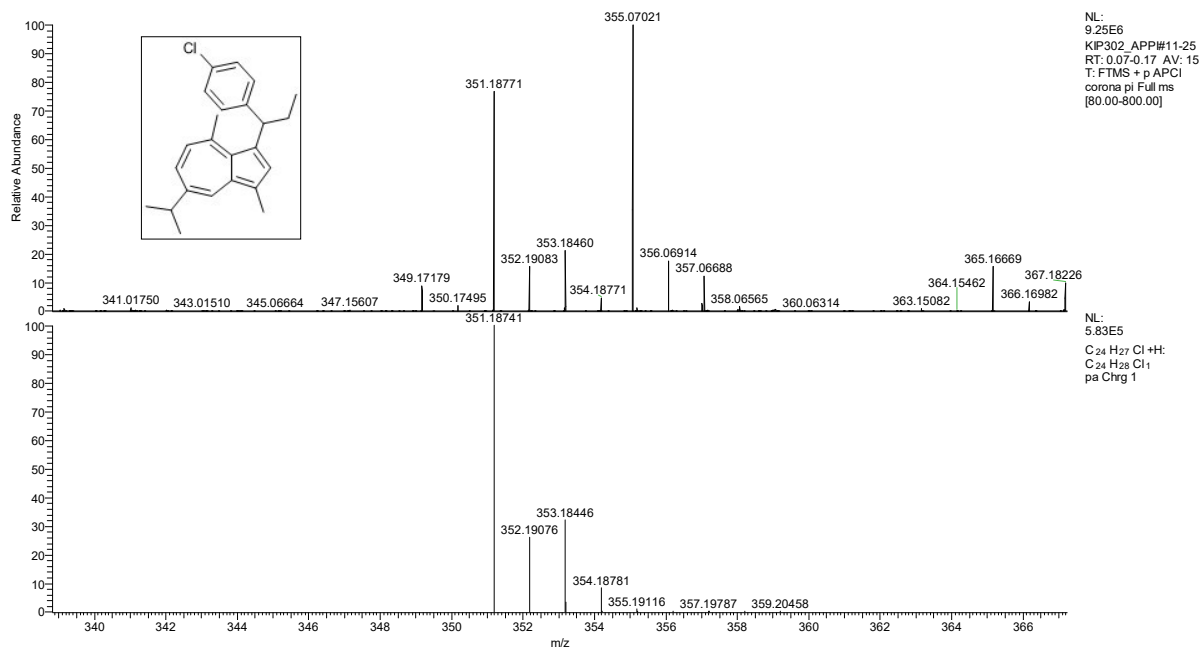

Figure S180. HRMS picture of compound [6h](#).

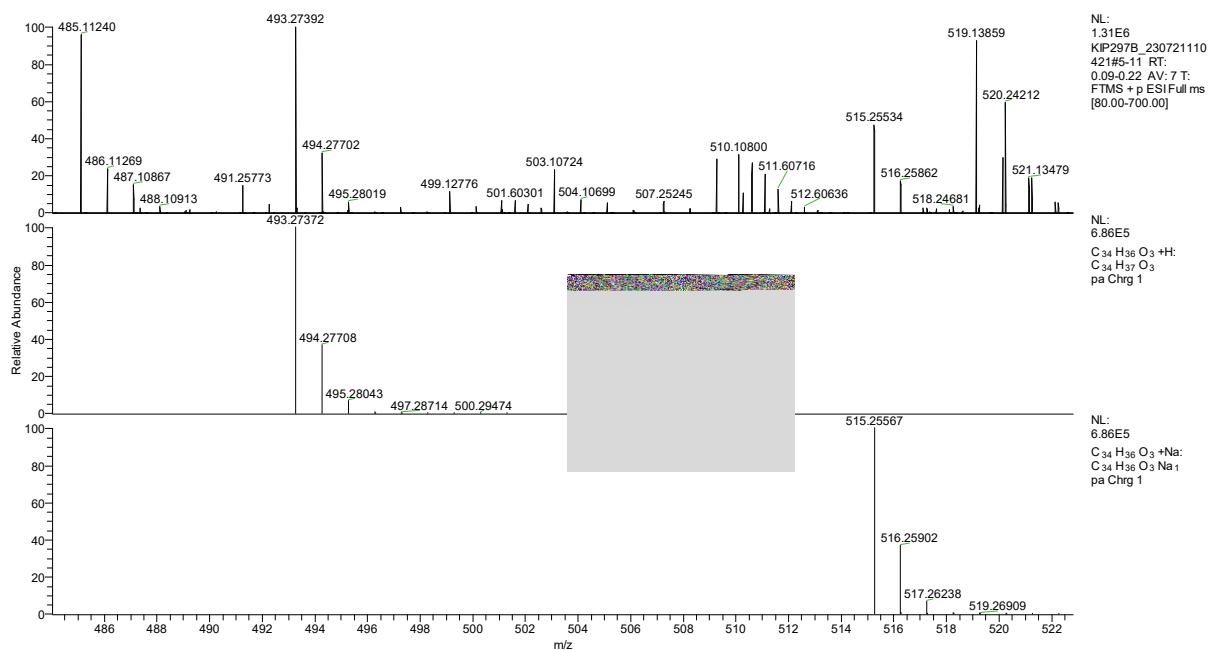

Figure S181. HRMS picture of compound [5bb/diastereomer 1](#).

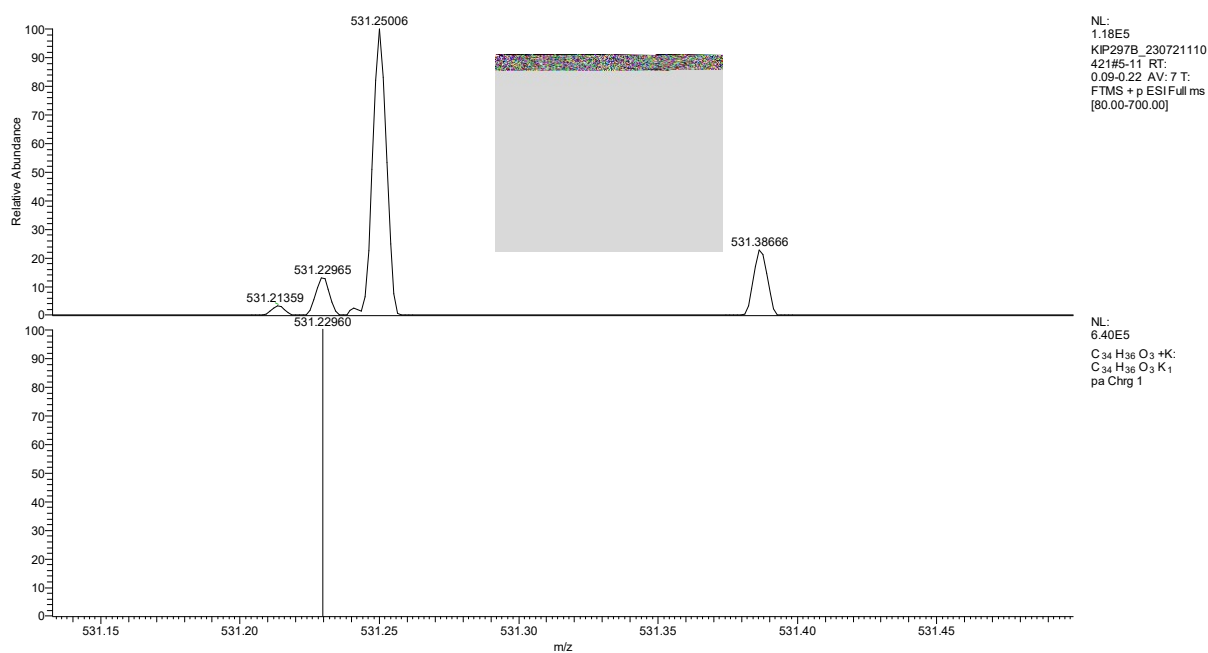

Figure S182. HRMS picture of compound [5bb/diastereomer 1](#) (K<sup>+</sup> adduct).

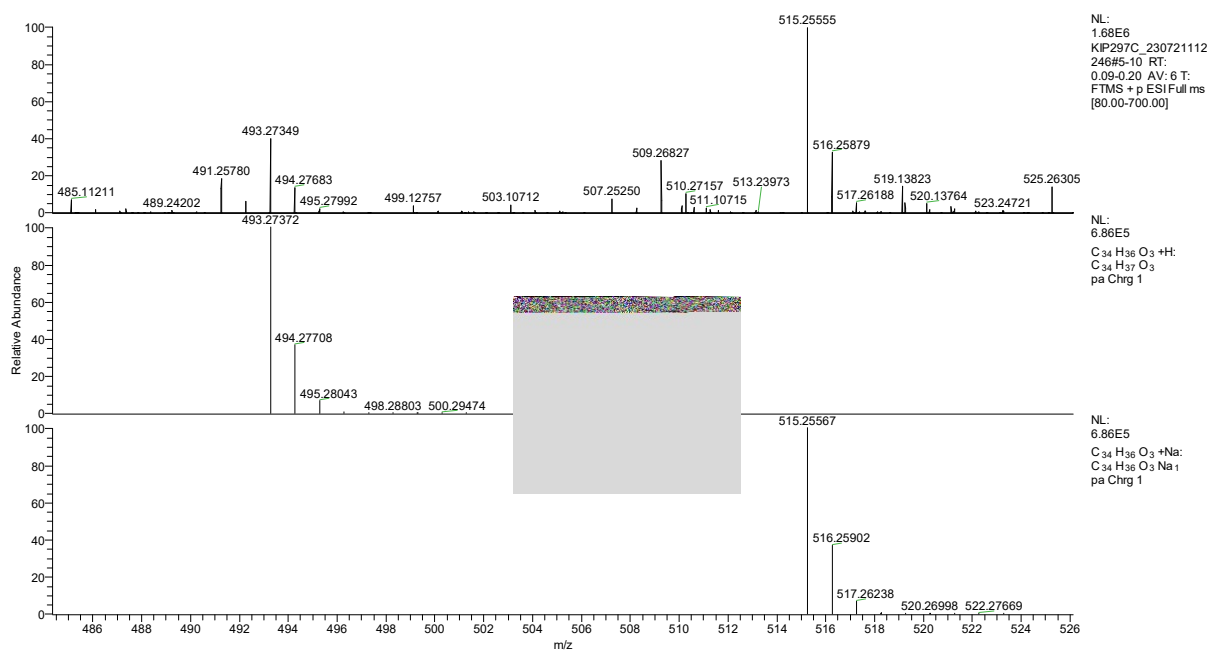

Figure S183. HRMS picture of compound [5bb/diastereomer 2](#).

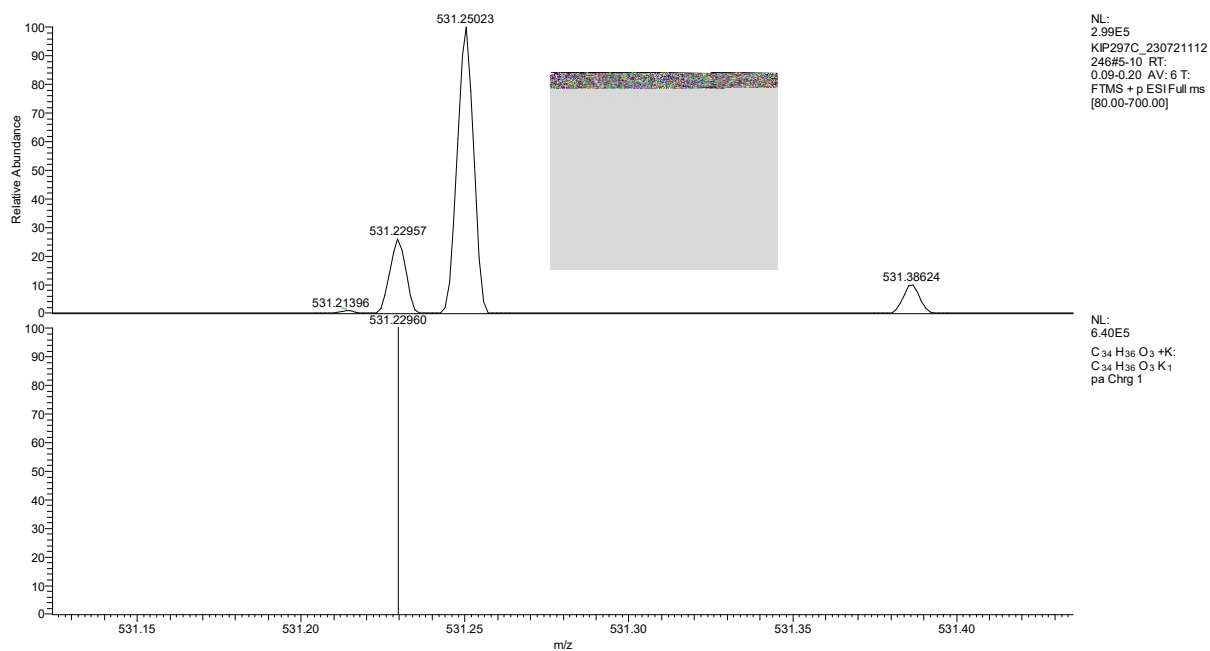

Figure S184. HRMS picture of compound [5bb/diastereomer 2](#) (K<sup>+</sup> adduct).

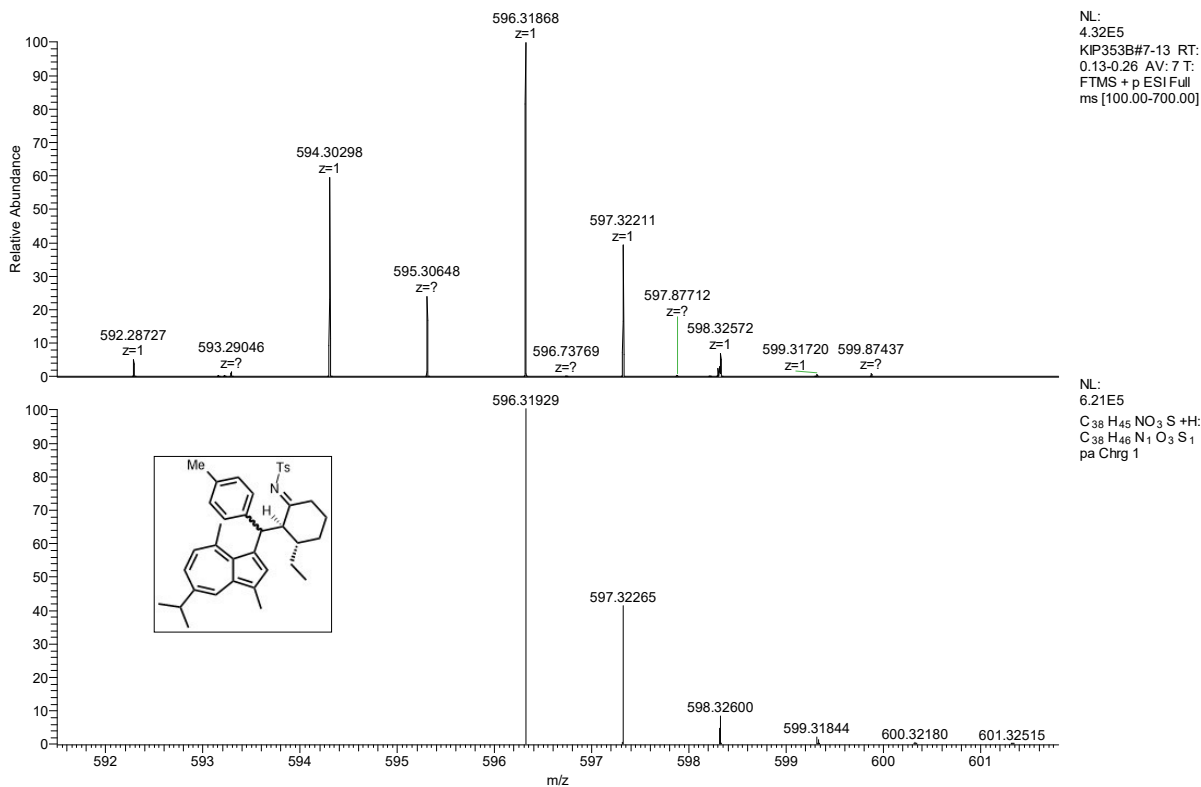

Figure S185. HRMS picture of compound [5cb/diastereomer 1](#).

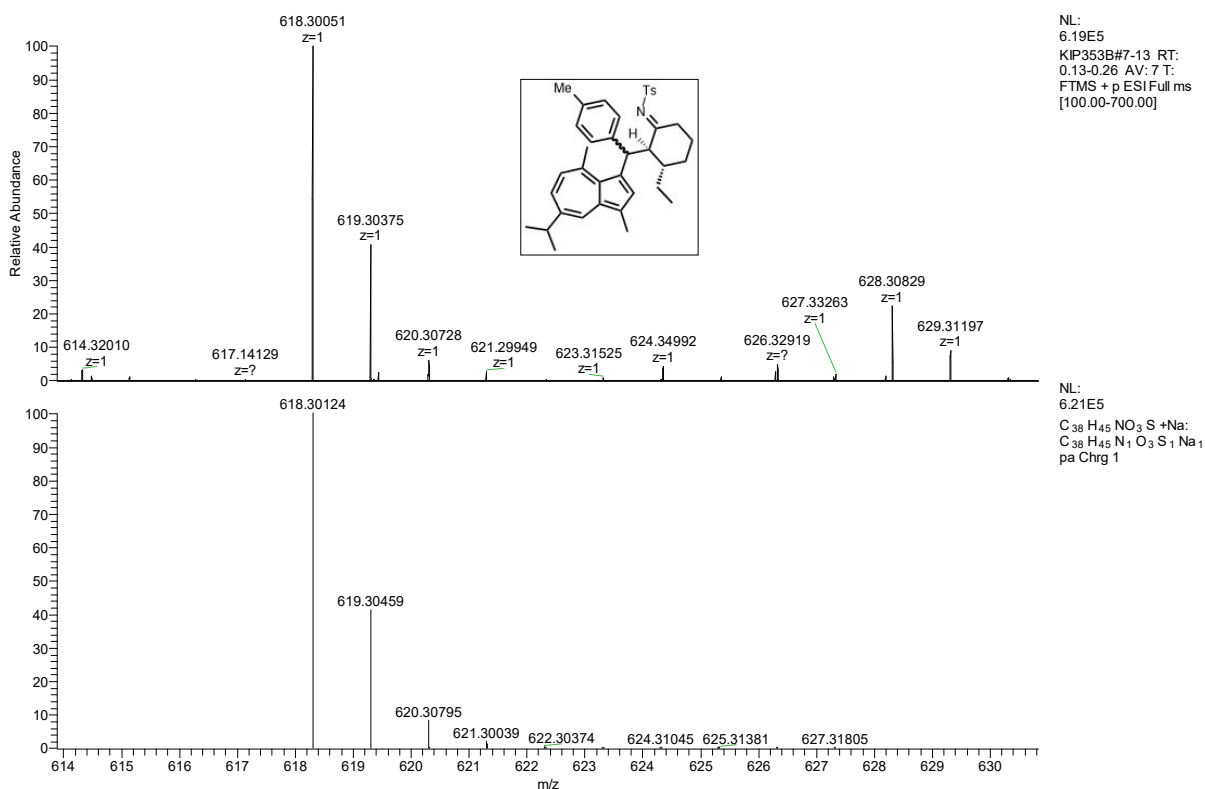

Figure S186. HRMS picture of compound [5cb/diastereomer 1](#) (Na<sup>+</sup> adduct).



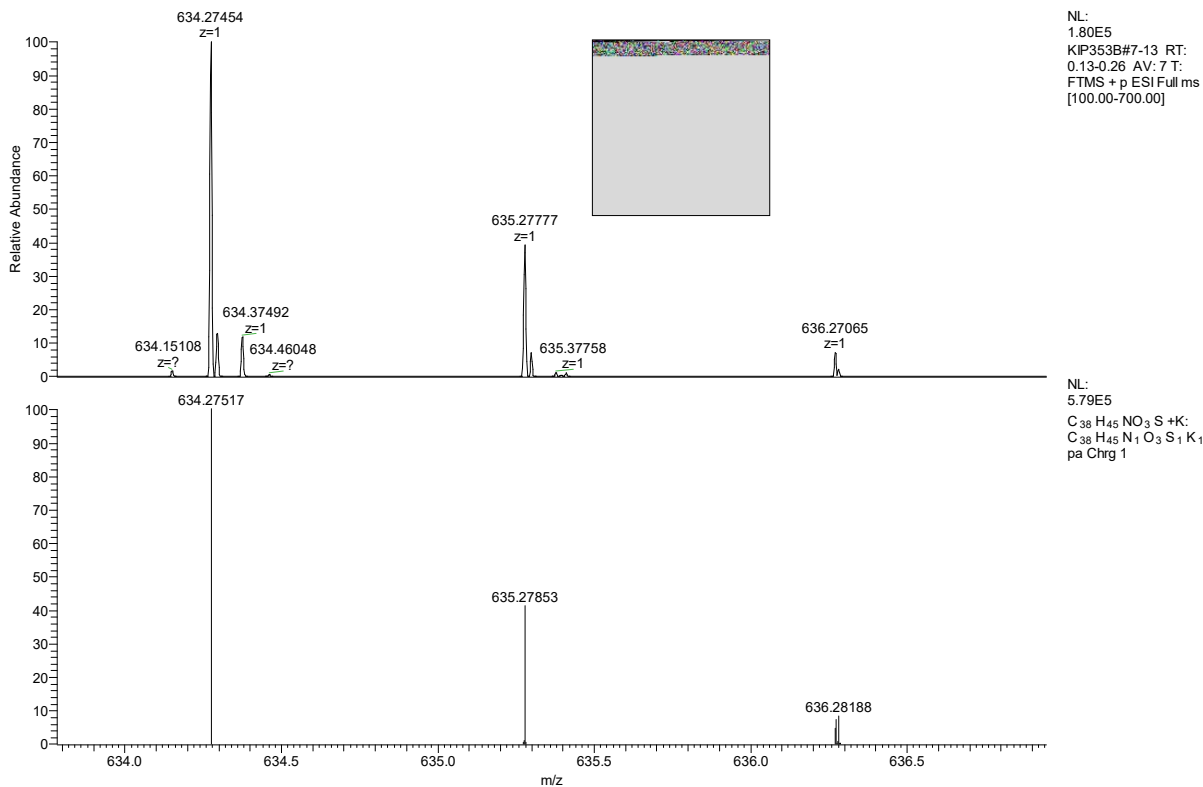

Figure S187. HRMS picture of compound [5cb/diastereomer 1](#) (K<sup>+</sup> adduct).

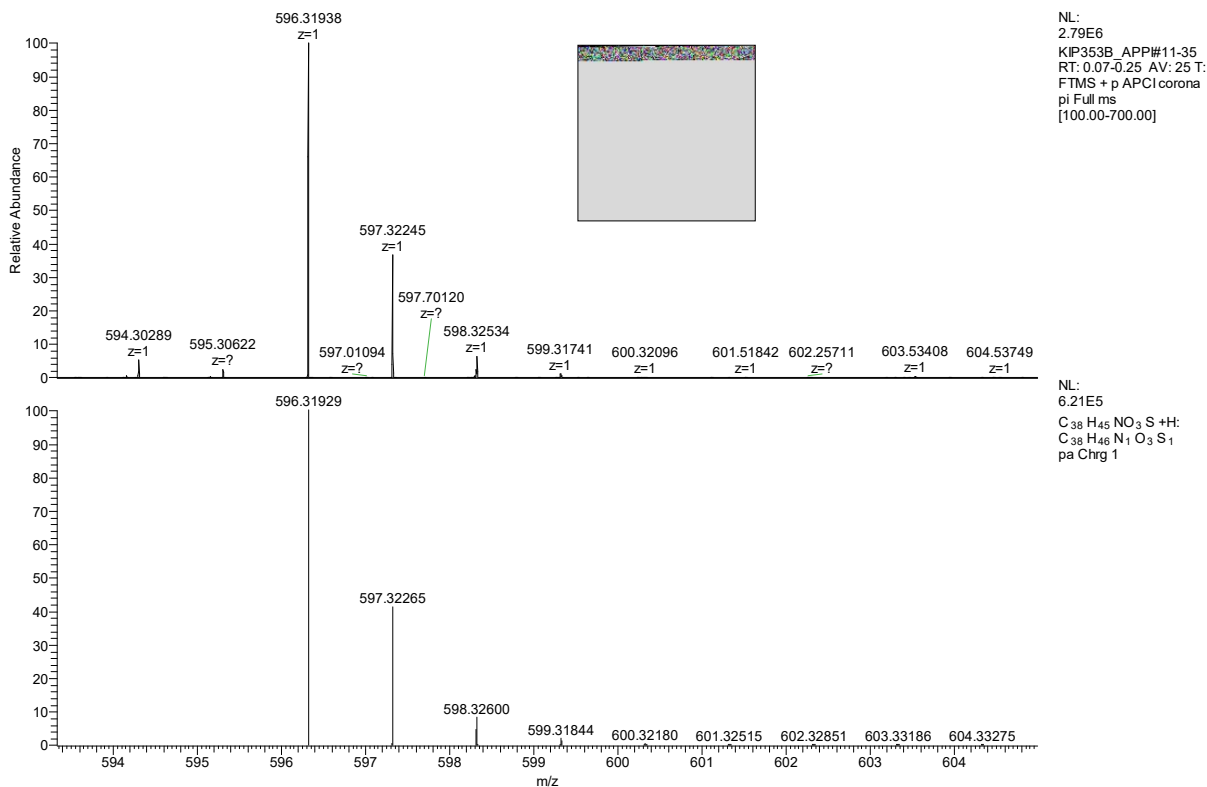

Figure S188. HRMS picture of compound [5cb/diastereomer 1](#) (APPI).

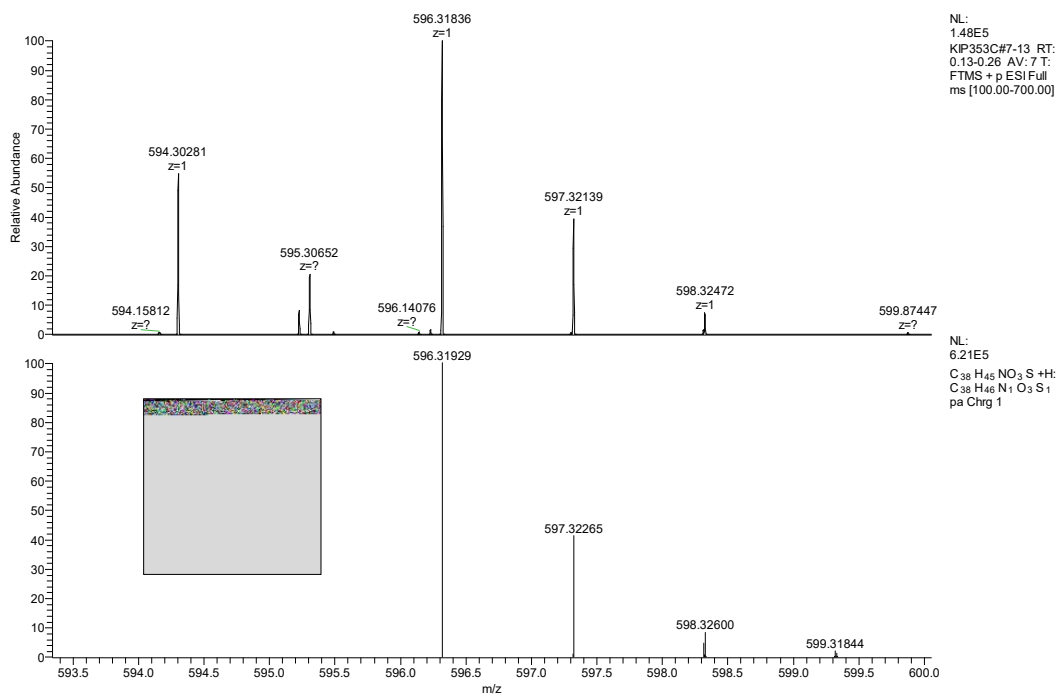

Figure S189. HRMS picture of compound [5cb/diastereomer 2](#).

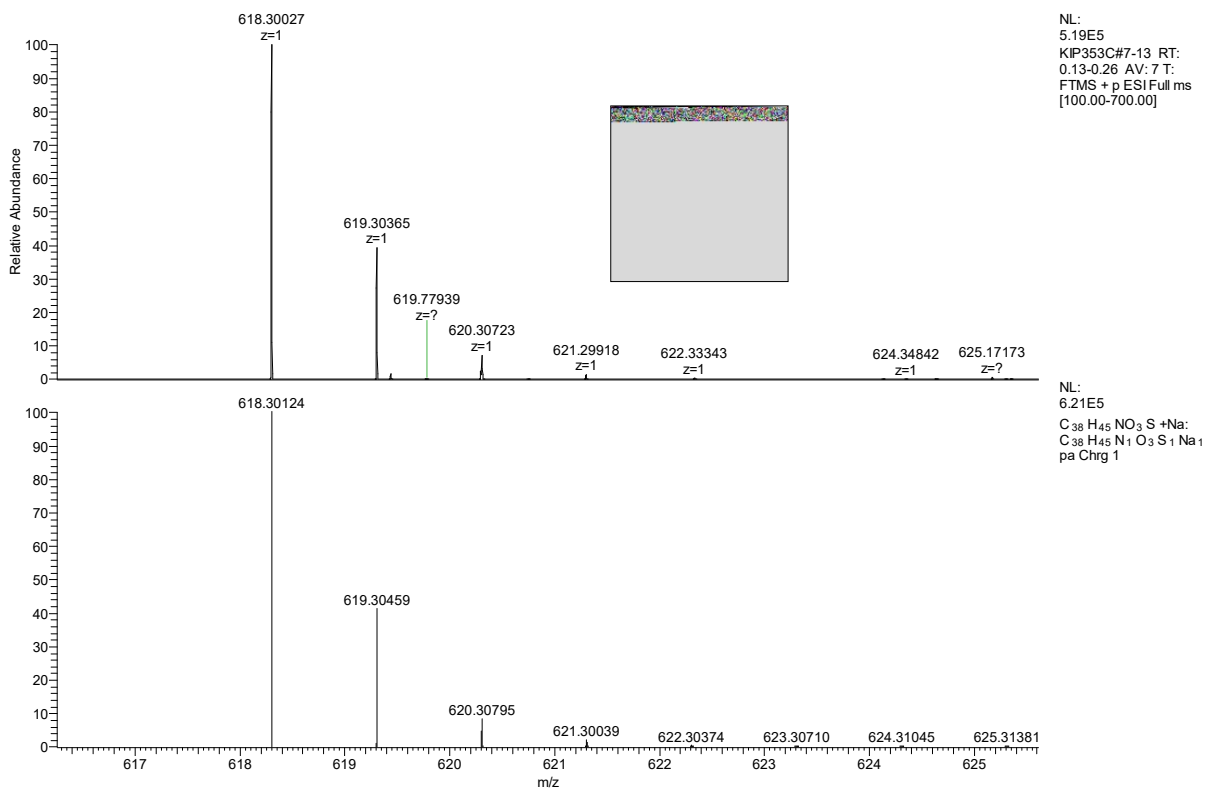

Figure S190. HRMS picture of compound [5cb/diastereomer 2](#) ( $Na^+$  adduct).

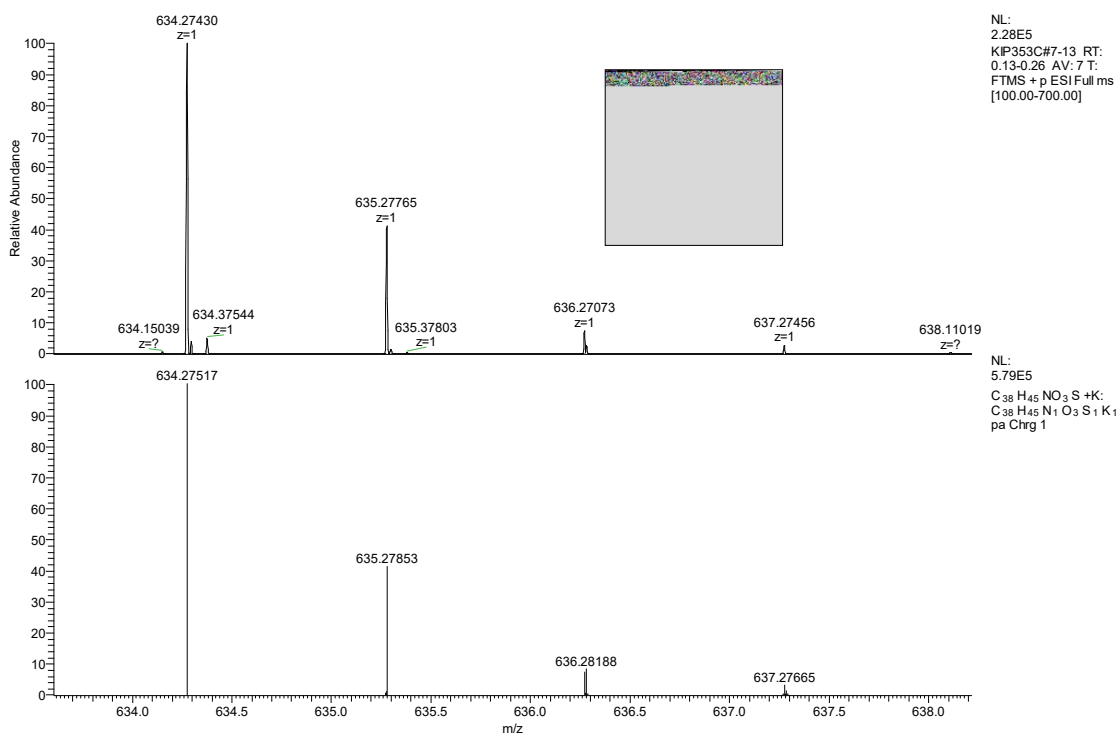

Figure S191. HRMS picture of compound [5cb/diastereomer 2](#) (K<sup>+</sup> adduct).

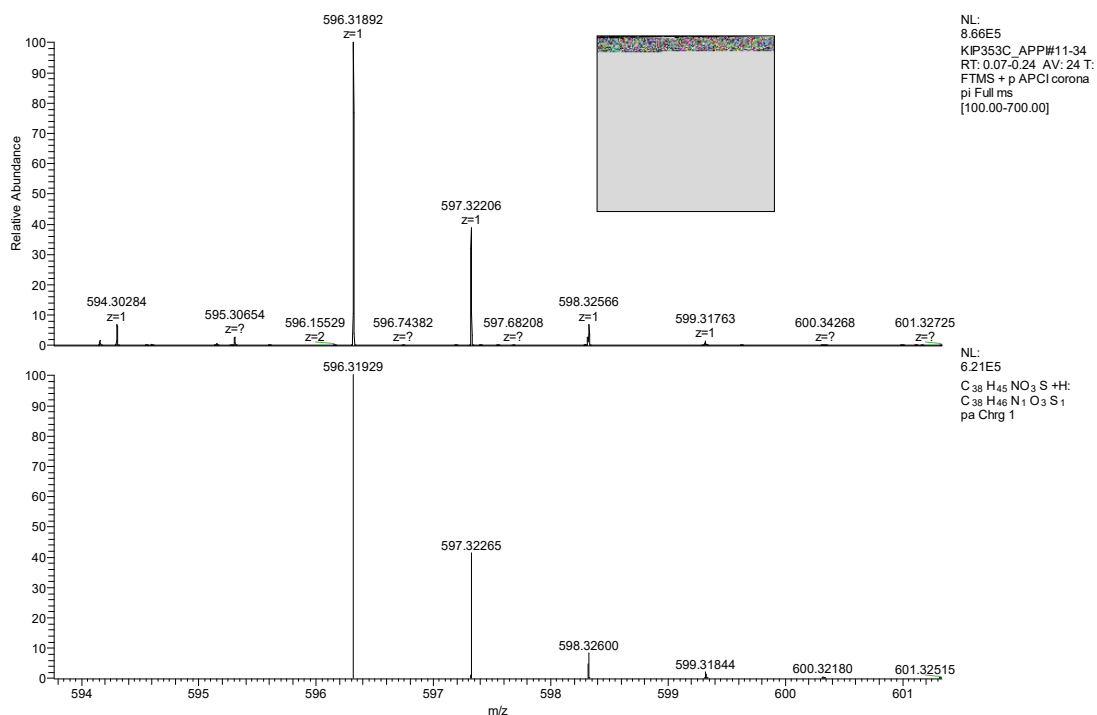

Figure S192. HRMS picture of compound [5cb/diastereomer 2](#) (APPI).

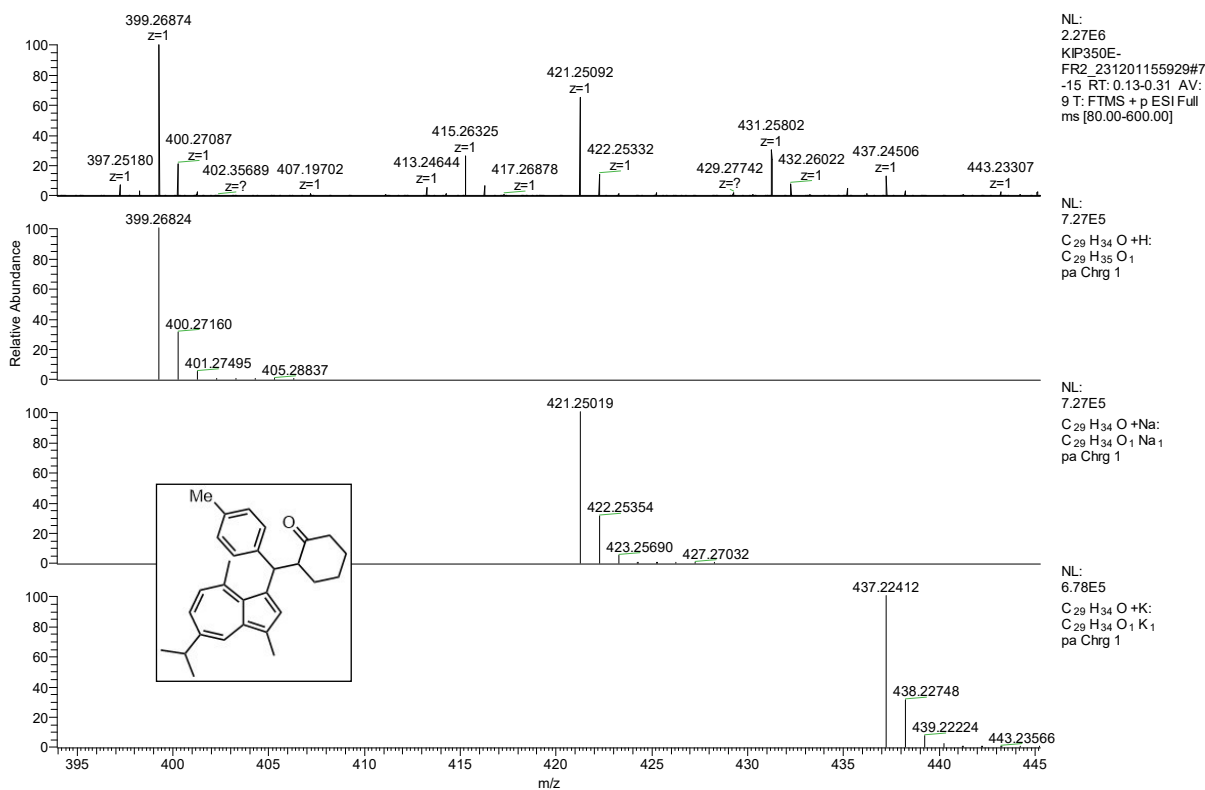

Figure S193. HRMS picture of compound [7a/diastereomer 1](#).

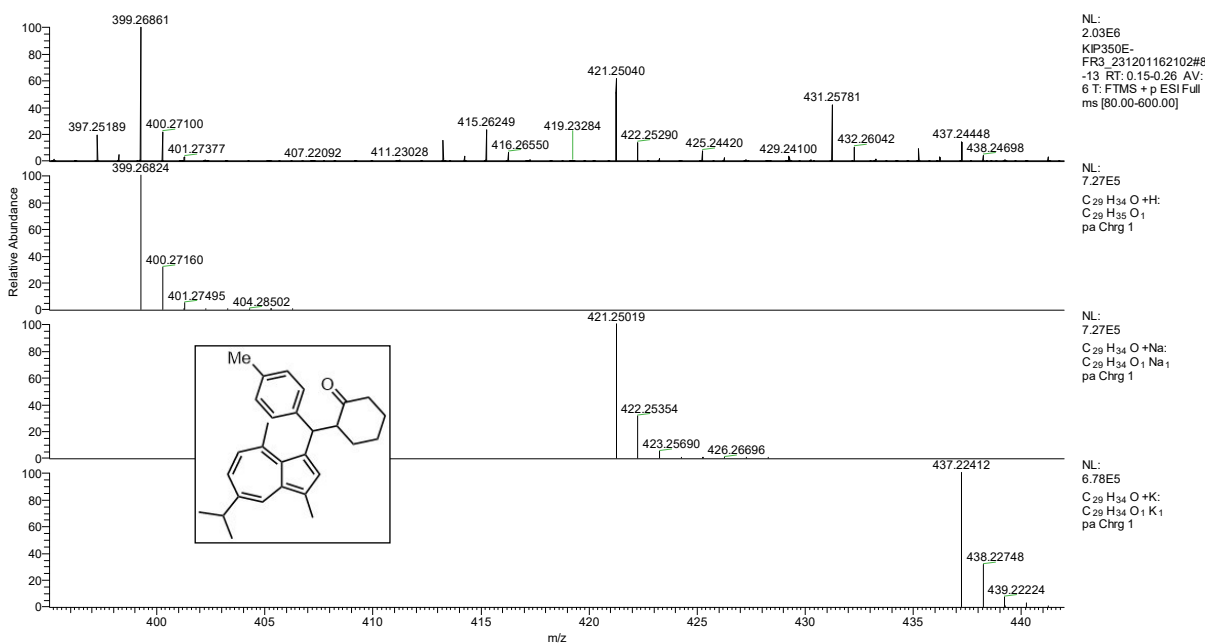

Figure S194. HRMS picture of compound [7a/diastereomer 2](#).

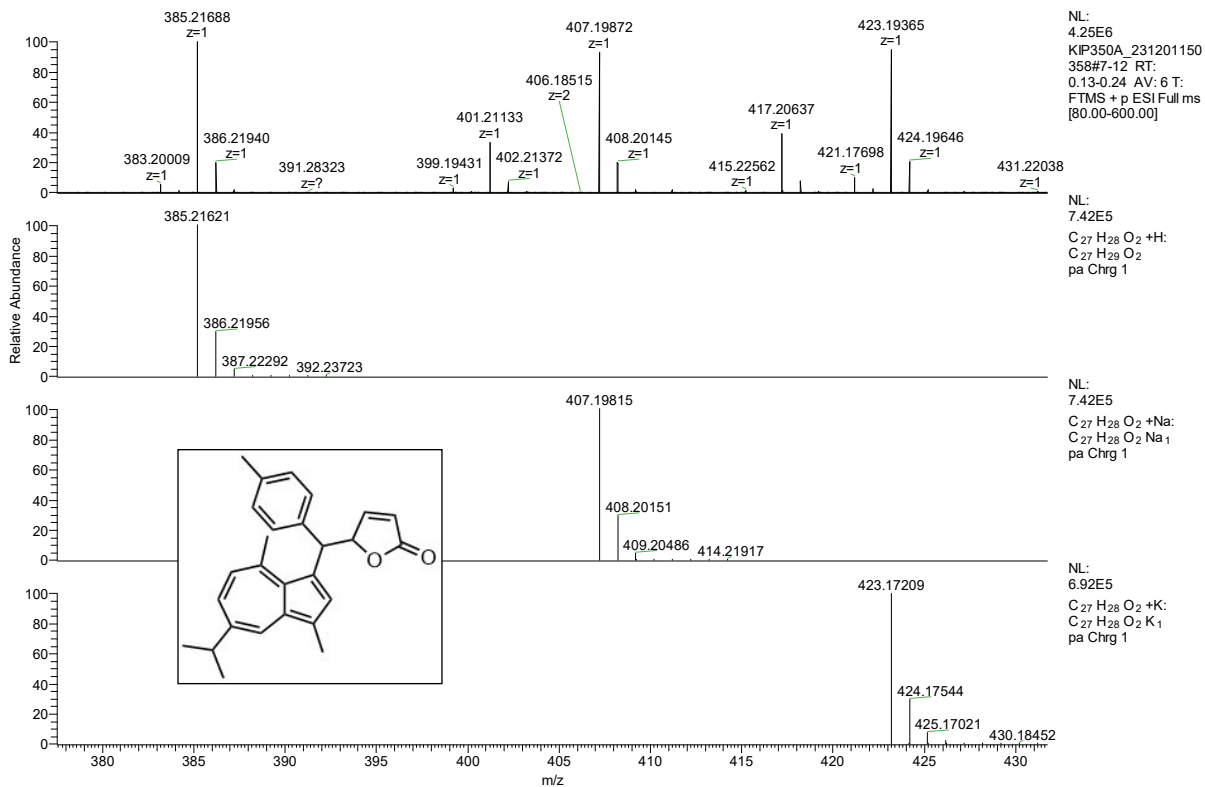

Figure S195. HRMS picture of compound [7b](#).

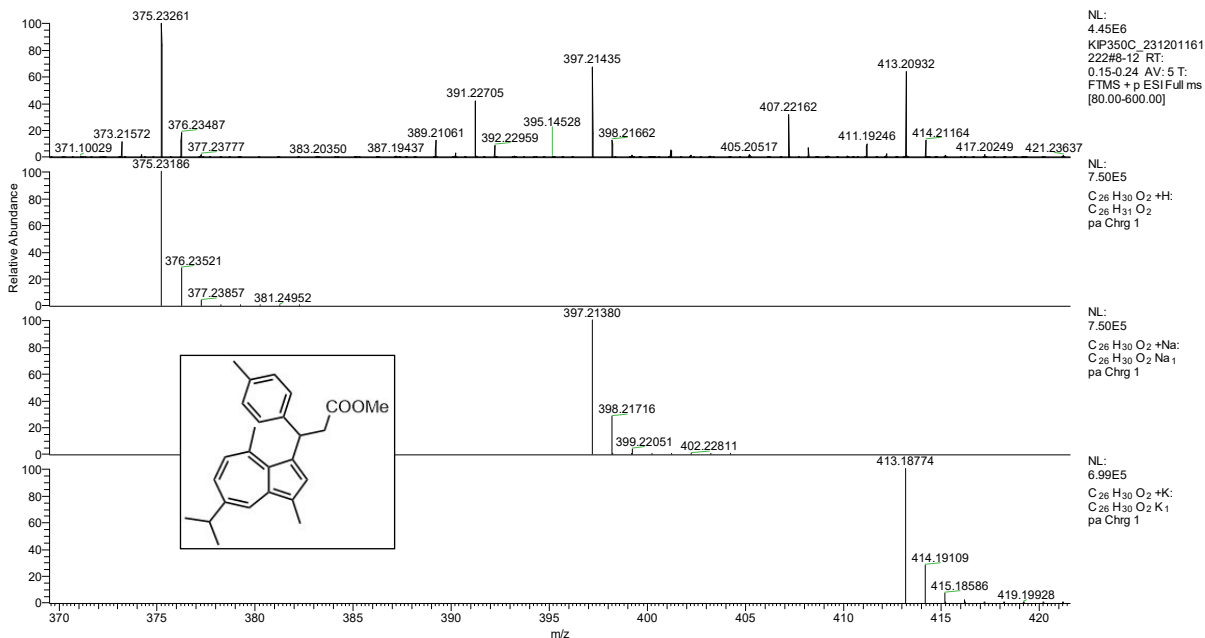

Figure S196. HRMS picture of compound [7c](#).

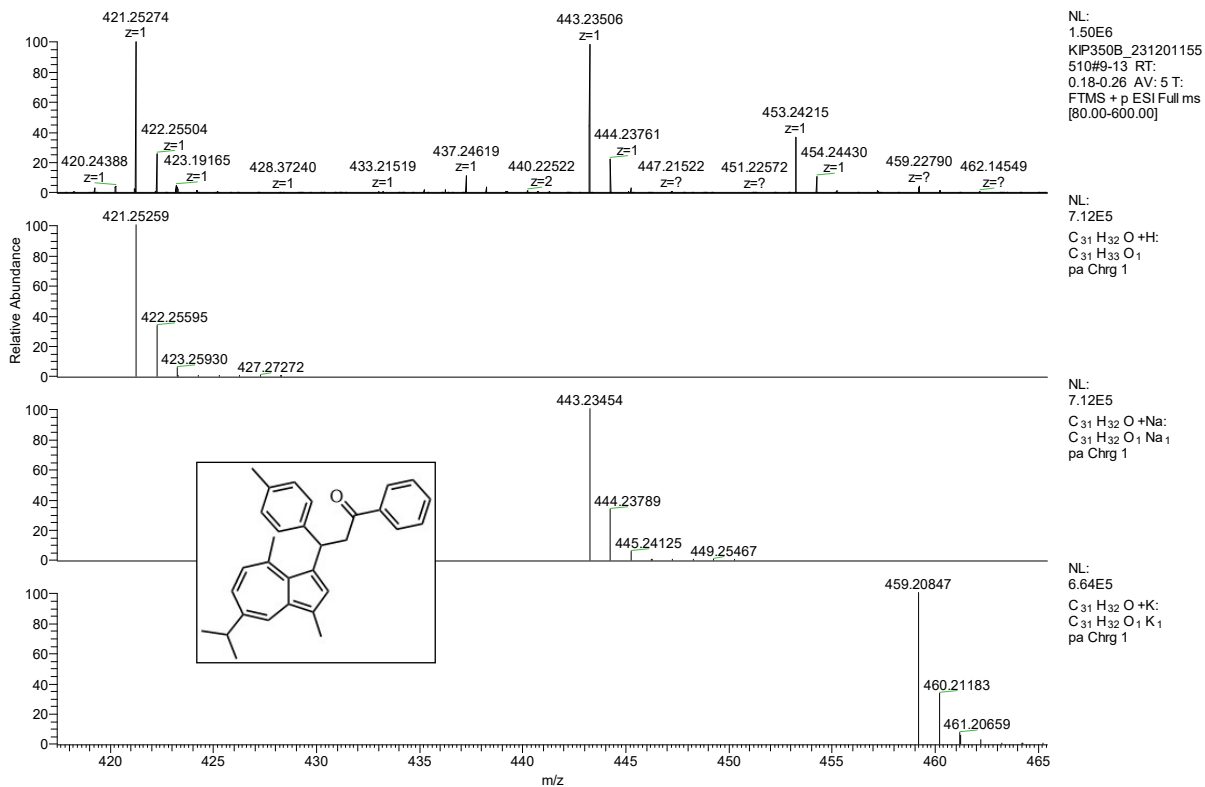

Figure S197. HRMS picture of compound [7d](#).

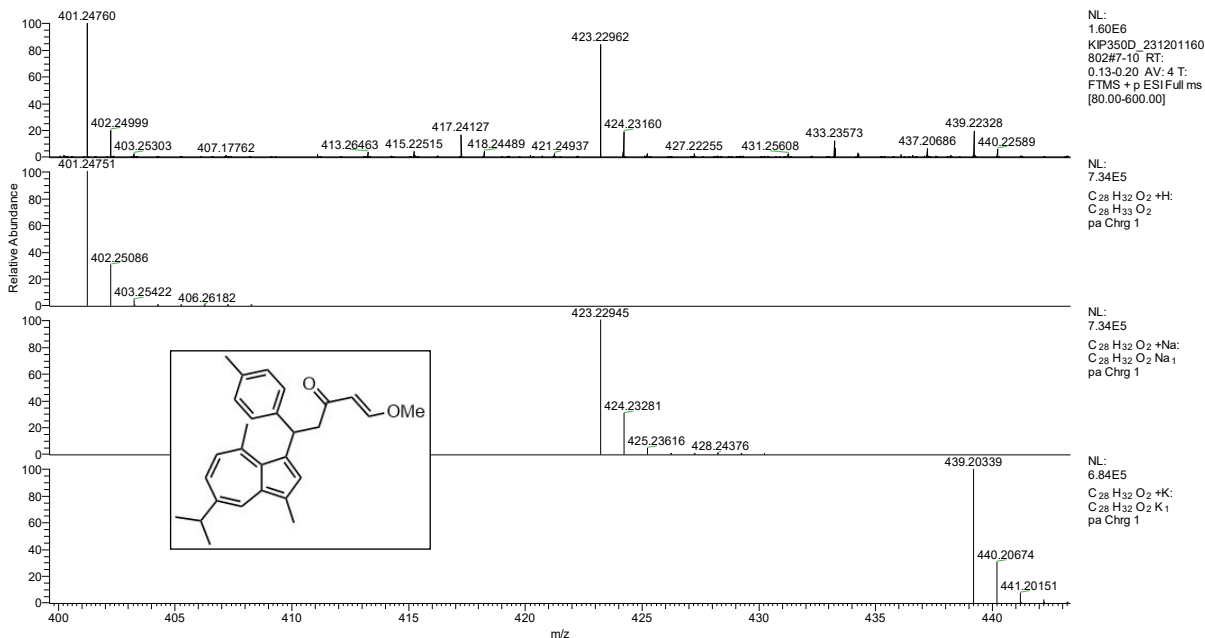

Figure S198. HRMS picture of compound [7e](#).

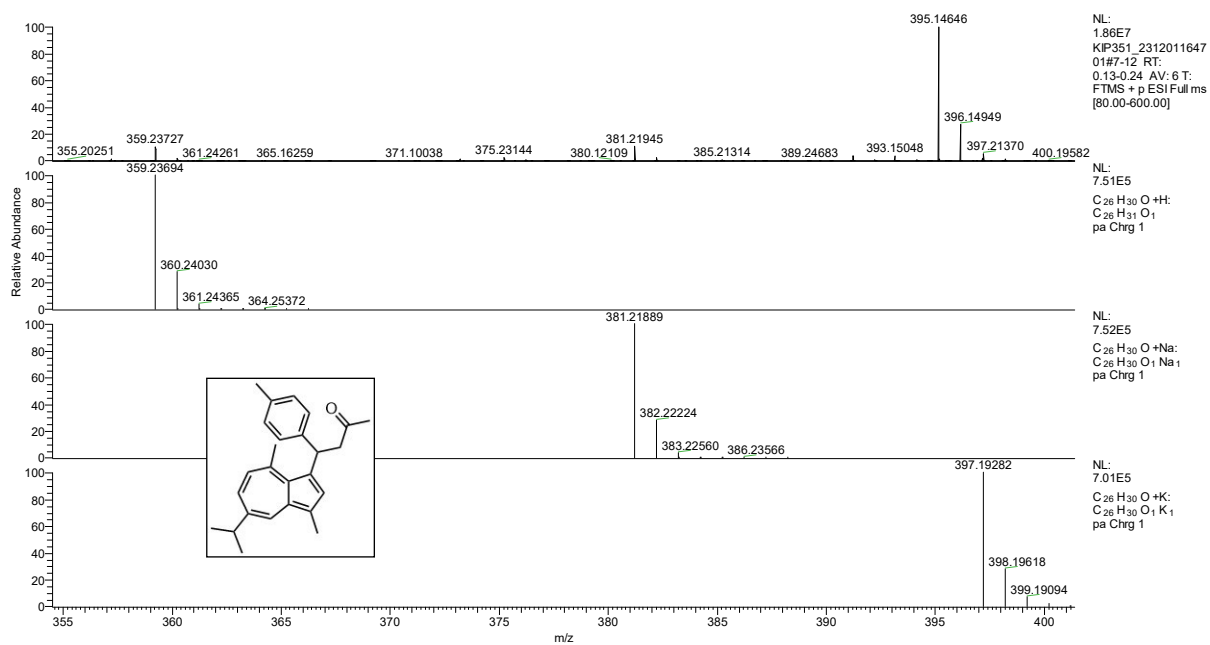

Figure S199. HRMS picture of compound [7f](#).

## 10. Spectroscopic study

Electronic (UV-Vis and fluorescence) spectra were recorded on an Agilent Cary 8454 UV-Visible Spectrophotometer and an Edinburgh Instruments FLS1000 Photoluminescence Spectrometer in 1 cm fluorescence cuvette (sample fluorescence was measured in a right-angle arrangement). Reaction progress was monitored by both UV-Vis and fluorescence spectroscopy through a decrease in absorbance of carbocation **2a** at 530 nm or an increase in fluorescence of guaiazulene product **7c** at its emission maximum.

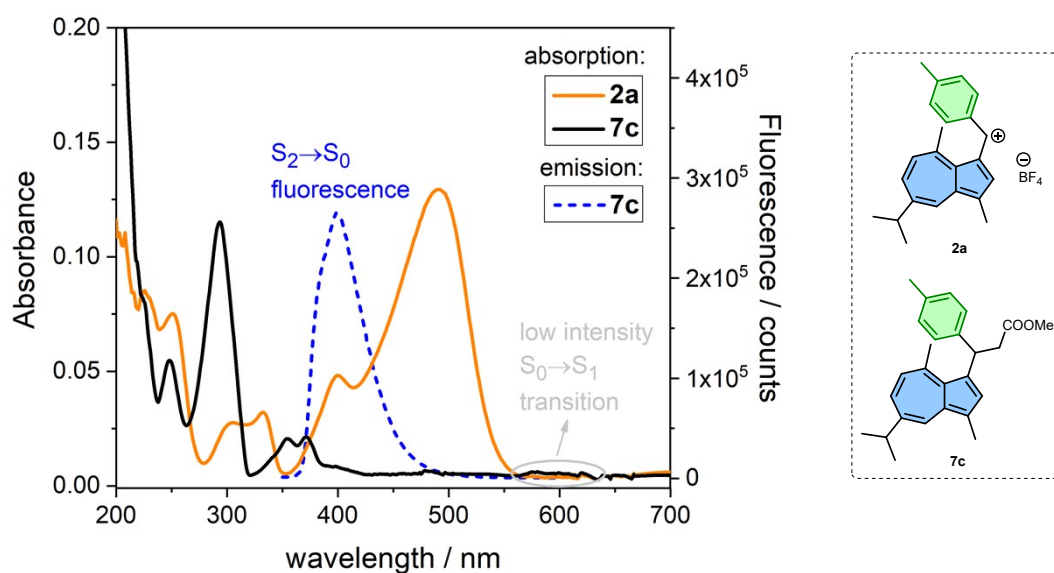

**Figure S200.** UV-Vis absorption spectra of guaiazulene-based carbocation **2a** and guaiazulene product **7c** (the product **7c** shows typical azulene-like low intensity  $S_0 \rightarrow S_1$  transition), and fluorescence spectrum of **7c** (carbocation **2a** is non-emissive).

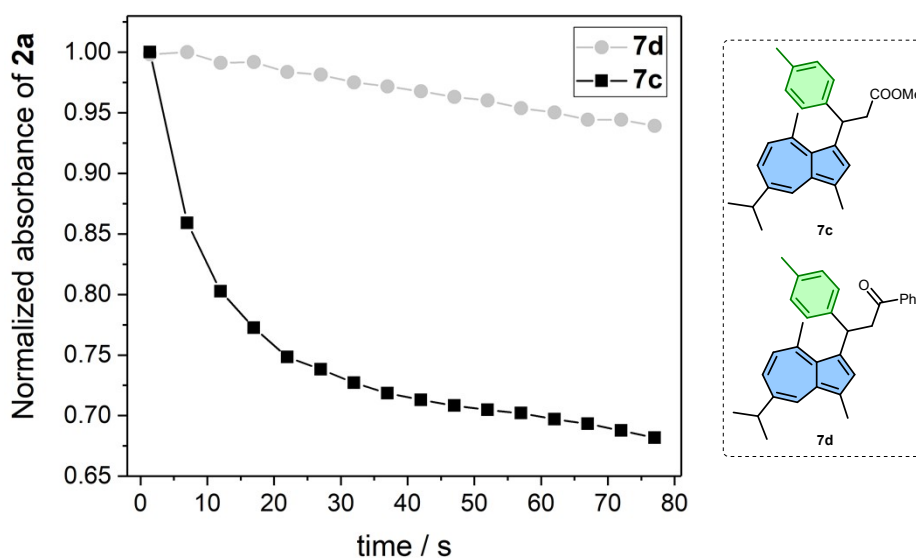

**Figure S201.** Comparison of initial decrease in absorbance at 530 nm of orange guaiazulene-based carbocation **2a** after addition of the strongest (20 eq Nu,  $c_{\text{cation}} = 0.02 \mu\text{mol/mL}$ ) and the weakest nucleophile (13 eq Nu,  $c_{\text{cation}} = 0.22 \mu\text{mol/mL}$ ) in the series (leading to formation of guaiazulene products **7c** and **7d**, respectively).



**Table S2.** Basic UV-Vis absorption characteristics of the studied carbocations.

| Compound    | Absorption maxima $\lambda_A$ [nm] | Extinction coefficient $\epsilon_A$ [ $M^{-1} cm^{-1}$ ] |
|-------------|------------------------------------|----------------------------------------------------------|
| <u>2a</u>   | 488                                | 32400                                                    |
| <u>2a'</u>  | 491                                | 29300                                                    |
| <u>2a''</u> | 487                                | 29500                                                    |
| <u>2b</u>   | 530                                | 45600                                                    |
| <u>2c</u>   | 652                                | 115200                                                   |
| <u>2d</u>   | 518                                | 29500                                                    |
| <u>2e</u>   | 473                                | 22200                                                    |
| <u>2f</u>   | 479                                | 24000                                                    |
| <u>2g</u>   | 473                                | 15300                                                    |
|             | 723 <sup>a</sup>                   | 8600                                                     |
| <u>2h</u>   | 474                                | 21100                                                    |
| <u>2h'</u>  | 474                                | 25200                                                    |

<sup>a</sup> 2<sup>nd</sup> long-wavelength maximum due to the ferrocene arm

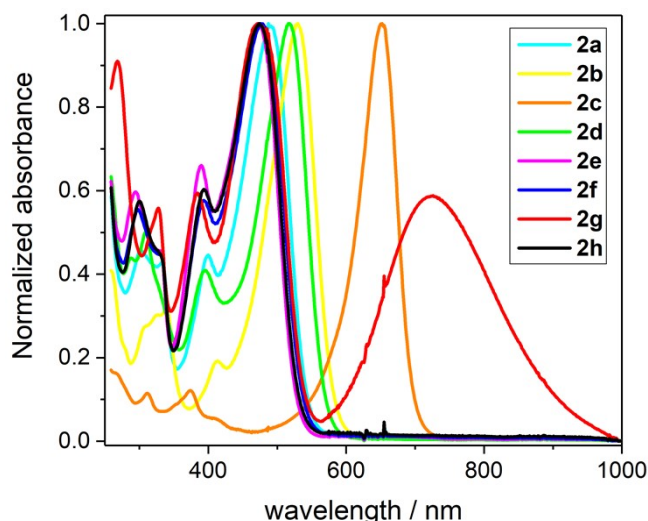

**Figure S202.** UV-Vis absorption spectra of the studied carbocations (spectra of **2a'**, **2a''** and **2h'** are almost identical to **2a** and **2h**, respectively) + photo of stock solutions (below).

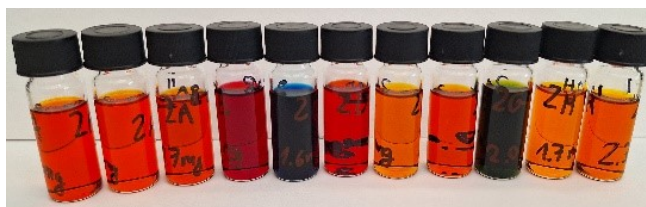

### Electrophilicity parameter

At a nucleophile (Nu) excess, the reaction rate (decrease in concentration of a carbocation C) can be classified as a pseudo-first order reaction with an observed pseudo-first order rate constant  $k_{obs}$ :

$$-\frac{d[C]}{dt} = k_{obs}[C] = k_{bi}[Nu][C] \quad \Rightarrow \quad k_{bi} = \frac{k_{obs}}{[Nu]}$$

where  $k_{bi}$  is the bimolecular rate constant for a reaction between carbocation (C) and a nucleophile (Nu). To determine the electrophilicity parameter (E) of the guaiazulene-based cation **2a**, we used the generally known Mayr-Patz equation:<sup>7</sup>

$$\log k_{bi} = S_N(N + E) \quad \Rightarrow \quad E = \frac{(\log k_{bi} - S_N N)}{S_N}$$

where  $k_{bi}$  is the bimolecular rate constant mentioned above (determined at the temperature of 20 °C), N is the nucleophilicity parameter, and  $S_N$  is the nucleophile-specific sensitivity parameter.

**Figure S203** shows the reaction progress at three different excesses of nucleophile 1-phenyl-1-trimethylsiloxyethylene. The experimentally determined electrophilicity parameter of -7.02 is in relatively good agreement with the DFT-calculated value of -5.85 (Table 1 in the main text;  $k_{bi} = 0.17$  L

$\text{mol}^{-1} \text{s}^{-1}$  - calculated as arithmetic average of  $k_{\text{bi}}$  values determined at each excess of nucleophile;  $S_{\text{N}} = 0.96$  and  $N = 6.22$ ).<sup>8</sup>

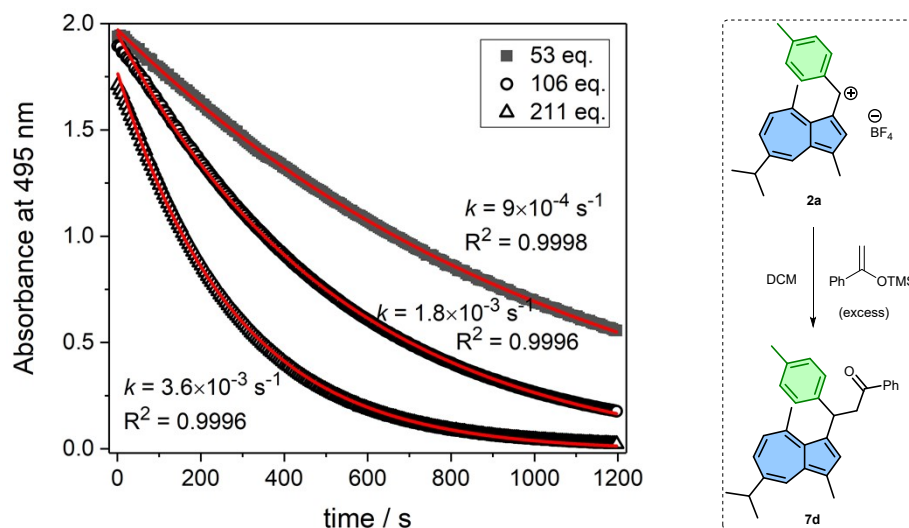

**Figure S203.** Decreased Vis-light absorption of carbocation reactant **2a** due to guaiazole product **7d** formation at different excesses of nucleophile 1-phenyl-1-trimethylsilyloxyethylene (53, 106, and 211 equivalents, which corresponds to concentration of  $5.51 \times 10^{-3} \text{ mol L}^{-1}$ ,  $1.07 \times 10^{-2} \text{ mol L}^{-1}$ , and  $2.0 \times 10^{-2} \text{ mol L}^{-1}$ , respectively). Red lines represent mono-exponential fits of experimental data;  $k$  is a pseudo-first order rate constant at a nucleophile excess.

## 11. Computational study

DFT calculations were realized using Turbomole 7.7 program package.<sup>9</sup> Geometric optimizations were performed using PBEh-3c functional,<sup>10</sup> with def2-mSVP basis set.<sup>11</sup> Energies were refined using PBE0 functional<sup>12</sup> with Grimme's empirical D4 dispersion correction,<sup>13</sup> and def2-TZVP basis set.<sup>14</sup> Influence of solvent was taken into account using COSMO( $\infty$ ) approach.<sup>15</sup>

### Guaiazulene-tol-cation

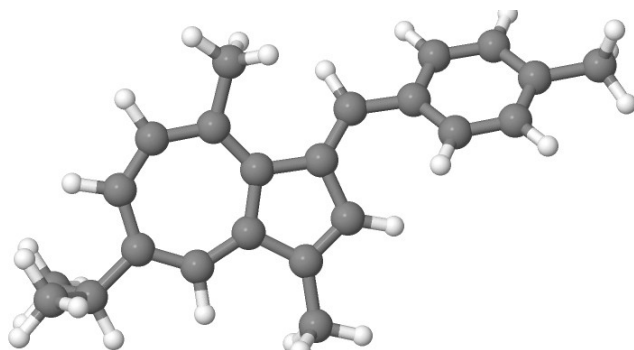

Geometry optimization: PBEh-3c/mSVP  
SCF energy = -889.29975278242 Hartree

Thermochemical properties at 298.15 K  
Chemical potential = 0.372536 Hartree  
Entropy = 0.000254 Hartree/K  
Inner energy = 0.447319 Hartree  
ZPE = 0.4255 Hartree  
Enthalpy = 0.448263 Hartree

Single point energy at PBE0-D4/TZVP COSMO( $\infty$ )  
SCF energy = -890.61208876801 Hartree

Coordinates:

|    | Atom | X       | Y       | Z      |
|----|------|---------|---------|--------|
| 1  | C    | 0.6478  | -0.9052 | 0.2731 |
| 2  | C    | 0.7529  | 0.5319  | 0.2951 |
| 3  | C    | 2.8622  | -0.4432 | 0.1948 |
| 4  | C    | 1.9756  | -1.4666 | 0.2186 |
| 5  | C    | 2.1825  | 0.8273  | 0.2123 |
| 6  | C    | -0.4695 | -1.7335 | 0.2718 |
| 7  | C    | -0.2943 | 1.4306  | 0.4803 |
| 8  | C    | -1.6580 | 1.0799  | 0.4914 |
| 9  | C    | -1.8186 | -1.4265 | 0.2895 |
| 10 | C    | -2.3170 | -0.1223 | 0.3807 |
| 11 | H    | 3.9286  | -0.5595 | 0.0762 |
| 12 | C    | 2.2912  | -2.9199 | 0.1512 |
| 13 | C    | 2.7934  | 2.0329  | 0.0075 |
| 14 | H    | -0.2428 | -2.7932 | 0.2354 |

|    |   |         |         |         |
|----|---|---------|---------|---------|
| 15 | C | -0.0405 | 2.8993  | 0.6845  |
| 16 | H | -2.3254 | 1.9259  | 0.6045  |
| 17 | C | -2.8168 | -2.5616 | 0.2301  |
| 18 | H | -3.3972 | -0.0343 | 0.3980  |
| 19 | H | -0.9155 | 3.3887  | 1.1055  |
| 20 | H | 0.7905  | 3.0817  | 1.3631  |
| 21 | H | 0.1718  | 3.4023  | -0.2611 |
| 22 | H | -2.2484 | -3.4929 | 0.1620  |
| 23 | C | -3.6923 | -2.4637 | -1.0203 |
| 24 | C | -3.6601 | -2.6283 | 1.5046  |
| 25 | H | -4.3454 | -3.3336 | -1.0837 |
| 26 | H | -4.3339 | -1.5813 | -1.0046 |
| 27 | H | -3.0960 | -2.4293 | -1.9316 |
| 28 | H | -3.0405 | -2.7128 | 2.3970  |
| 29 | H | -4.2989 | -1.7513 | 1.6208  |
| 30 | H | -4.3141 | -3.4992 | 1.4706  |
| 31 | H | 1.8548  | -3.3903 | -0.7319 |
| 32 | H | 3.3664  | -3.0794 | 0.1057  |
| 33 | H | 1.9210  | -3.4562 | 1.0271  |
| 34 | H | 2.1791  | 2.8787  | -0.2662 |
| 35 | C | 4.2013  | 2.3241  | 0.0531  |
| 36 | C | 4.6881  | 3.3848  | -0.7247 |
| 37 | C | 6.0303  | 3.6982  | -0.7335 |
| 38 | C | 6.9346  | 2.9997  | 0.0673  |
| 39 | C | 6.4433  | 1.9767  | 0.8810  |
| 40 | C | 5.1067  | 1.6396  | 0.8773  |
| 41 | H | 4.0054  | 3.9486  | -1.3488 |
| 42 | H | 6.3857  | 4.5042  | -1.3628 |
| 43 | C | 8.3824  | 3.3729  | 0.0943  |
| 44 | H | 7.1219  | 1.4481  | 1.5384  |
| 45 | H | 4.7524  | 0.8796  | 1.5609  |
| 46 | H | 8.5612  | 4.1521  | 0.8383  |
| 47 | H | 8.7162  | 3.7610  | -0.8666 |
| 48 | H | 9.0136  | 2.5251  | 0.3554  |

### Methyl-anion

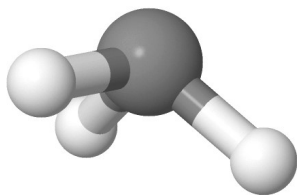

Geometry optimization: PBEh-3c/mSVP  
SCF energy = -39.70861194145 Hartree

Thermochemical properties at 298.15 K  
Chemical potential = 0.010369 Hartree  
Entropy = 0.000077 Hartree/K  
Inner energy = 0.032414 Hartree  
ZPE = 0.029545 Hartree  
Enthalpy = 0.033358 Hartree

Single point energy at PBE0-D4/TZVP COSMO( $\infty$ )  
SCF energy = -39.90919462669 Hartree

Coordinates:

|   | Atom | X       | Y       | Z       |
|---|------|---------|---------|---------|
| 1 | C    | 0.0225  | 0.0736  | -0.0101 |
| 2 | H    | -0.4527 | -0.3968 | -0.8966 |
| 3 | H    | -0.7245 | -0.0826 | 0.7966  |
| 4 | H    | 0.8372  | -0.6341 | 0.2521  |

### Guaiazulene-tol-Me-product

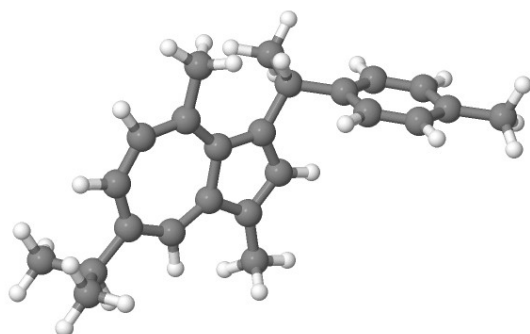

Geometry optimization: PBEh-3c/mSVP  
SCF energy = -929.35289315336 Hartree

Thermochemical properties at 298.15 K  
Chemical potential = 0.409731 Hartree  
Entropy = 0.000266 Hartree/K  
Inner energy = 0.488225 Hartree  
ZPE = 0.464697 Hartree  
Enthalpy = 0.489169 Hartree

Single point energy at PBE0-D4/TZVP COSMO( $\infty$ )  
SCF energy = -930.65910166939 Hartree

Coordinates:

|    | Atom | X       | Y       | Z       |
|----|------|---------|---------|---------|
| 1  | C    | 0.6333  | -0.9555 | -0.0844 |
| 2  | C    | 0.7736  | 0.5291  | 0.0396  |
| 3  | C    | 2.7686  | -0.4056 | -0.5066 |
| 4  | C    | 1.8971  | -1.4747 | -0.4239 |
| 5  | C    | 2.1223  | 0.8136  | -0.2322 |
| 6  | C    | -0.4663 | -1.7707 | 0.0805  |
| 7  | C    | -0.2779 | 1.4000  | 0.3656  |
| 8  | C    | -1.5991 | 1.0324  | 0.6214  |
| 9  | C    | -1.7885 | -1.4770 | 0.4087  |
| 10 | C    | -2.2515 | -0.1946 | 0.6432  |
| 11 | H    | 3.8221  | -0.4906 | -0.7405 |
| 12 | C    | 2.2450  | -2.9094 | -0.6437 |
| 13 | C    | 2.8777  | 2.1185  | -0.3408 |
| 14 | H    | -0.2614 | -2.8263 | -0.0762 |
| 15 | C    | -0.0229 | 2.8816  | 0.4802  |
| 16 | H    | -2.2537 | 1.8644  | 0.8527  |
| 17 | C    | -2.7721 | -2.6298 | 0.5097  |
| 18 | H    | -3.3067 | -0.1147 | 0.8866  |
| 19 | H    | -0.9485 | 3.4249  | 0.6586  |
| 20 | H    | 0.6458  | 3.1056  | 1.3121  |
| 21 | H    | 0.4233  | 3.2939  | -0.4235 |
| 22 | H    | -2.2178 | -3.5479 | 0.2917  |
| 23 | C    | -3.8884 | -2.5196 | -0.5285 |
| 24 | C    | -3.3422 | -2.7715 | 1.9204  |
| 25 | H    | -4.5408 | -3.3934 | -0.4891 |
| 26 | H    | -4.5121 | -1.6406 | -0.3577 |
| 27 | H    | -3.4849 | -2.4463 | -1.5383 |
| 28 | H    | -2.5487 | -2.8777 | 2.6600  |

|    |   |         |         |         |
|----|---|---------|---------|---------|
| 29 | H | -3.9416 | -1.9038 | 2.2017  |
| 30 | H | -3.9876 | -3.6485 | 1.9908  |
| 31 | H | 1.6759  | -3.3536 | -1.4635 |
| 32 | H | 3.3003  | -3.0126 | -0.8935 |
| 33 | H | 2.0645  | -3.5206 | 0.2434  |
| 34 | C | 4.2787  | 1.9686  | 0.2231  |
| 35 | C | 5.4320  | 2.0913  | -0.5389 |
| 36 | C | 6.6893  | 1.9385  | 0.0337  |
| 37 | C | 6.8377  | 1.6628  | 1.3853  |
| 38 | C | 5.6790  | 1.5370  | 2.1497  |
| 39 | C | 4.4286  | 1.6851  | 1.5798  |
| 40 | H | 5.3681  | 2.3064  | -1.5974 |
| 41 | H | 7.5694  | 2.0368  | -0.5912 |
| 42 | C | 8.1960  | 1.5319  | 2.0102  |
| 43 | H | 5.7584  | 1.3158  | 3.2078  |
| 44 | H | 3.5442  | 1.5629  | 2.1947  |
| 45 | H | 8.5481  | 2.4916  | 2.3941  |
| 46 | H | 8.9366  | 1.1797  | 1.2927  |
| 47 | H | 8.1879  | 0.8337  | 2.8471  |
| 48 | C | 2.8481  | 2.6252  | -1.7832 |
| 49 | H | 2.4002  | 2.8773  | 0.2772  |
| 50 | H | 3.2987  | 1.9055  | -2.4678 |
| 51 | H | 1.8189  | 2.7685  | -2.1119 |
| 52 | H | 3.3710  | 3.5773  | -1.8889 |

### Guaiazulene-F-Ph-cation

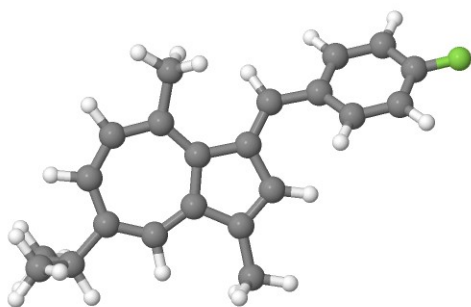

Geometry optimization: PBEh-3c/mSVP  
 SCF energy = -949.11480634047 Hartree

Thermochemical properties at 298.15 K  
 Chemical potential = 0.338565 Hartree  
 Entropy = 0.000242 Hartree/K

Inner energy = 0.409847 Hartree  
ZPE = 0.389148 Hartree  
Enthalpy = 0.410791 Hartree

Single point energy at PBE0-D4/TZVP COSMO( $\infty$ )  
SCF energy = -950.51957606034 Hartree

Coordinates:

|    | Atom | X       | Y       | Z       |
|----|------|---------|---------|---------|
| 1  | C    | 0.6418  | -0.9103 | 0.2772  |
| 2  | C    | 0.7495  | 0.5252  | 0.3018  |
| 3  | C    | 2.8586  | -0.4554 | 0.2022  |
| 4  | C    | 1.9697  | -1.4756 | 0.2237  |
| 5  | C    | 2.1814  | 0.8177  | 0.2192  |
| 6  | C    | -0.4770 | -1.7366 | 0.2728  |
| 7  | C    | -0.2949 | 1.4268  | 0.4872  |
| 8  | C    | -1.6596 | 1.0791  | 0.4979  |
| 9  | C    | -1.8255 | -1.4265 | 0.2896  |
| 10 | C    | -2.3211 | -0.1211 | 0.3840  |
| 11 | H    | 3.9248  | -0.5755 | 0.0847  |
| 12 | C    | 2.2807  | -2.9296 | 0.1562  |
| 13 | C    | 2.7934  | 2.0206  | 0.0157  |
| 14 | H    | -0.2525 | -2.7967 | 0.2339  |
| 15 | C    | -0.0375 | 2.8947  | 0.6923  |
| 16 | H    | -2.3250 | 1.9264  | 0.6123  |
| 17 | C    | -2.8261 | -2.5586 | 0.2253  |
| 18 | H    | -3.4011 | -0.0309 | 0.4014  |
| 19 | H    | -0.9129 | 3.3872  | 1.1087  |
| 20 | H    | 0.7906  | 3.0745  | 1.3752  |
| 21 | H    | 0.1807  | 3.3968  | -0.2524 |
| 22 | H    | -2.2603 | -3.4914 | 0.1560  |
| 23 | C    | -3.6986 | -2.4543 | -1.0269 |
| 24 | C    | -3.6723 | -2.6257 | 1.4981  |
| 25 | H    | -4.3539 | -3.3223 | -1.0940 |
| 26 | H    | -4.3378 | -1.5703 | -1.0101 |
| 27 | H    | -3.1002 | -2.4193 | -1.9369 |
| 28 | H    | -3.0551 | -2.7138 | 2.3917  |
| 29 | H    | -4.3094 | -1.7476 | 1.6147  |
| 30 | H    | -4.3283 | -3.4949 | 1.4605  |
| 31 | H    | 1.8439  | -3.3982 | -0.7276 |
| 32 | H    | 3.3553  | -3.0929 | 0.1123  |
| 33 | H    | 1.9071  | -3.4645 | 1.0315  |
| 34 | H    | 2.1823  | 2.8706  | -0.2516 |



|    |   |        |        |         |
|----|---|--------|--------|---------|
| 35 | C | 4.2056 | 2.3032 | 0.0552  |
| 36 | C | 4.6984 | 3.3504 | -0.7376 |
| 37 | C | 6.0405 | 3.6644 | -0.7542 |
| 38 | C | 6.8968 | 2.9488 | 0.0670  |
| 39 | C | 6.4425 | 1.9417 | 0.9048  |
| 40 | C | 5.1014 | 1.6229 | 0.8939  |
| 41 | H | 4.0198 | 3.9101 | -1.3690 |
| 42 | H | 6.4242 | 4.4574 | -1.3812 |
| 43 | F | 8.1840 | 3.2514 | 0.0706  |
| 44 | H | 7.1323 | 1.4357 | 1.5663  |
| 45 | H | 4.7372 | 0.8764 | 1.5866  |

### Guaiazulene-F-Ph-Me-product

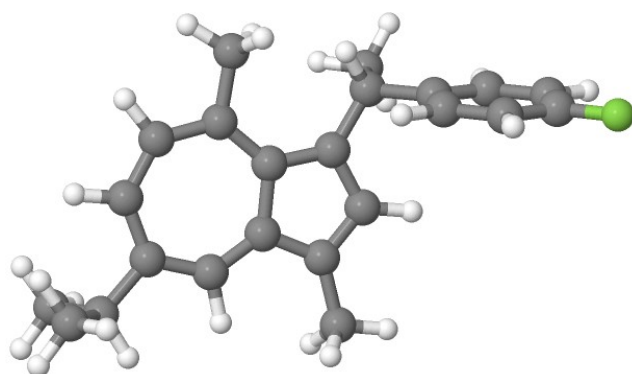

Geometry optimization: PBEh-3c/mSVP  
 SCF energy = -989.17319690534 Hartree

Thermochemical properties at 298.15 K  
 Chemical potential = 0.375523 Hartree  
 Entropy = 0.000255 Hartree/K  
 Inner energy = 0.450744 Hartree  
 ZPE = 0.42834 Hartree  
 Enthalpy = 0.451689 Hartree

Single point energy at PBE0-D4/TZVP COSMO( $\infty$ )  
 SCF energy = -990.56823012423 Hartree

Coordinates:

|   | Atom | X      | Y       | Z       |
|---|------|--------|---------|---------|
| 1 | C    | 0.6375 | -0.9508 | -0.0907 |
| 2 | C    | 0.7766 | 0.5337  | 0.0281  |
| 3 | C    | 2.7675 | -0.4001 | -0.5356 |

|    |   |         |         |         |
|----|---|---------|---------|---------|
| 4  | C | 1.8987  | -1.4697 | -0.4424 |
| 5  | C | 2.1220  | 0.8190  | -0.2558 |
| 6  | C | -0.4591 | -1.7672 | 0.0866  |
| 7  | C | -0.2748 | 1.4053  | 0.3551  |
| 8  | C | -1.5931 | 1.0369  | 0.6213  |
| 9  | C | -1.7793 | -1.4741 | 0.4241  |
| 10 | C | -2.2429 | -0.1916 | 0.6552  |
| 11 | H | 3.8186  | -0.4848 | -0.7807 |
| 12 | C | 2.2456  | -2.9045 | -0.6637 |
| 13 | C | 2.8784  | 2.1231  | -0.3652 |
| 14 | H | -0.2538 | -2.8231 | -0.0676 |
| 15 | C | -0.0216 | 2.8882  | 0.4561  |
| 16 | H | -2.2483 | 1.8691  | 0.8502  |
| 17 | C | -2.7602 | -2.6282 | 0.5364  |
| 18 | H | -3.2965 | -0.1123 | 0.9057  |
| 19 | H | -0.9471 | 3.4316  | 0.6347  |
| 20 | H | 0.6507  | 3.1211  | 1.2828  |
| 21 | H | 0.4189  | 3.2932  | -0.4538 |
| 22 | H | -2.2045 | -3.5468 | 0.3244  |
| 23 | C | -3.8782 | -2.5272 | -0.5009 |
| 24 | C | -3.3275 | -2.7603 | 1.9492  |
| 25 | H | -4.5293 | -3.4016 | -0.4540 |
| 26 | H | -4.5027 | -1.6476 | -0.3356 |
| 27 | H | -3.4764 | -2.4609 | -1.5119 |
| 28 | H | -2.5325 | -2.8591 | 2.6883  |
| 29 | H | -3.9287 | -1.8922 | 2.2250  |
| 30 | H | -3.9705 | -3.6383 | 2.0270  |
| 31 | H | 1.6695  | -3.3502 | -1.4776 |
| 32 | H | 3.2987  | -3.0074 | -0.9228 |
| 33 | H | 2.0737  | -3.5143 | 0.2260  |
| 34 | C | 4.2738  | 1.9719  | 0.2128  |
| 35 | C | 5.4342  | 2.1260  | -0.5335 |
| 36 | C | 6.6913  | 1.9736  | 0.0410  |
| 37 | C | 6.7774  | 1.6652  | 1.3803  |
| 38 | C | 5.6451  | 1.5053  | 2.1589  |
| 39 | C | 4.4057  | 1.6578  | 1.5655  |
| 40 | H | 5.3794  | 2.3689  | -1.5860 |
| 41 | H | 7.5900  | 2.0939  | -0.5489 |
| 42 | F | 7.9827  | 1.5155  | 1.9443  |
| 43 | H | 5.7361  | 1.2616  | 3.2089  |
| 44 | H | 3.5137  | 1.5155  | 2.1641  |
| 45 | C | 2.8636  | 2.6228  | -1.8100 |
| 46 | H | 2.3965  | 2.8862  | 0.2437  |
| 47 | H | 3.3283  | 1.9036  | -2.4859 |

|    |   |        |        |         |
|----|---|--------|--------|---------|
| 48 | H | 1.8371 | 2.7557 | -2.1508 |
| 49 | H | 3.3786 | 3.5795 | -1.9144 |

**Guaiazulene-MeOPh-cation**

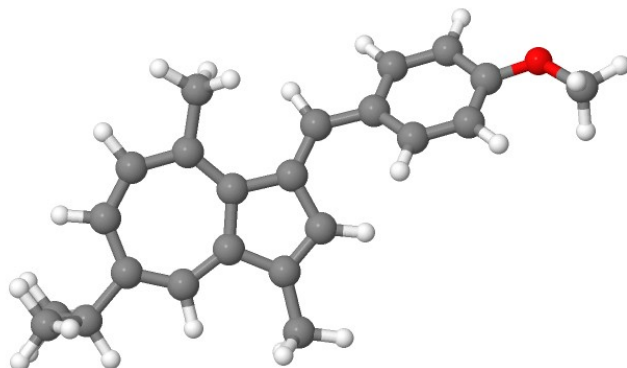

Geometry optimization: PBEh-3c/mSVP  
 SCF energy = -964.35210770465 Hartree

Thermochemical properties at 298.15 K  
 Chemical potential = 0.378772 Hartree  
 Entropy = 0.000254 Hartree/K  
 Inner energy = 0.453614 Hartree  
 ZPE = 0.431212 Hartree  
 Enthalpy = 0.454558 Hartree

Single point energy at PBE0-D4/TZVP COSMO( $\infty$ )  
 SCF energy = -965.78003448052 Hartree

Coordinates:

|    | Atom | X       | Y       | Z      |
|----|------|---------|---------|--------|
| 1  | C    | 0.6561  | -0.8856 | 0.3149 |
| 2  | C    | 0.7387  | 0.5563  | 0.2976 |
| 3  | C    | 2.8607  | -0.3836 | 0.2811 |
| 4  | C    | 1.9912  | -1.4240 | 0.3108 |
| 5  | C    | 2.1607  | 0.8725  | 0.2482 |
| 6  | C    | -0.4477 | -1.7308 | 0.3050 |
| 7  | C    | -0.3298 | 1.4409  | 0.4277 |
| 8  | C    | -1.6863 | 1.0674  | 0.4139 |
| 9  | C    | -1.8018 | -1.4463 | 0.2763 |
| 10 | C    | -2.3225 | -0.1495 | 0.3192 |
| 11 | H    | 3.9311  | -0.4863 | 0.1872 |
| 12 | C    | 2.3362  | -2.8723 | 0.2891 |

|    |   |         |         |         |
|----|---|---------|---------|---------|
| 13 | C | 2.7587  | 2.0891  | 0.0305  |
| 14 | H | -0.2033 | -2.7874 | 0.3037  |
| 15 | C | -0.1062 | 2.9197  | 0.5931  |
| 16 | H | -2.3707 | 1.9040  | 0.4862  |
| 17 | C | -2.7794 | -2.5998 | 0.2195  |
| 18 | H | -3.4041 | -0.0788 | 0.3060  |
| 19 | H | -1.0014 | 3.4070  | 0.9722  |
| 20 | H | 0.7011  | 3.1370  | 1.2900  |
| 21 | H | 0.1266  | 3.3971  | -0.3608 |
| 22 | H | -2.1939 | -3.5226 | 0.1881  |
| 23 | C | -3.6250 | -2.5478 | -1.0538 |
| 24 | C | -3.6534 | -2.6512 | 1.4738  |
| 25 | H | -4.2622 | -3.4299 | -1.1123 |
| 26 | H | -4.2812 | -1.6762 | -1.0760 |
| 27 | H | -3.0065 | -2.5248 | -1.9506 |
| 28 | H | -3.0549 | -2.7045 | 2.3828  |
| 29 | H | -4.3079 | -1.7817 | 1.5535  |
| 30 | H | -4.2932 | -3.5328 | 1.4448  |
| 31 | H | 1.9313  | -3.3745 | -0.5916 |
| 32 | H | 3.4151  | -3.0118 | 0.2738  |
| 33 | H | 1.9549  | -3.3935 | 1.1694  |
| 34 | H | 2.1362  | 2.9050  | -0.3082 |
| 35 | C | 4.1435  | 2.4246  | 0.1343  |
| 36 | C | 4.6248  | 3.5275  | -0.6002 |
| 37 | C | 5.9429  | 3.8949  | -0.5603 |
| 38 | C | 6.8418  | 3.1953  | 0.2600  |
| 39 | C | 6.3731  | 2.1335  | 1.0456  |
| 40 | C | 5.0498  | 1.7602  | 0.9754  |
| 41 | H | 3.9437  | 4.0834  | -1.2330 |
| 42 | H | 6.3062  | 4.7282  | -1.1463 |
| 43 | H | 7.0282  | 1.6113  | 1.7284  |
| 44 | H | 4.7013  | 0.9765  | 1.6344  |
| 45 | O | 8.0938  | 3.6213  | 0.2455  |
| 46 | C | 9.0690  | 2.9826  | 1.0482  |
| 47 | H | 8.8364  | 3.0700  | 2.1121  |
| 48 | H | 9.1809  | 1.9282  | 0.7853  |
| 49 | H | 10.0060 | 3.4949  | 0.8514  |

**Guaiazulene-MeOPh-Me-product**

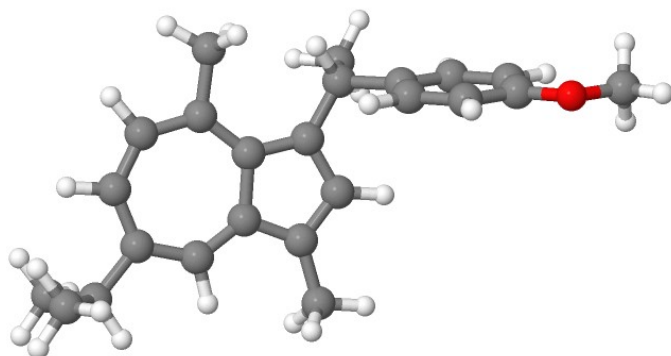

Geometry optimization: PBEh-3c/mSVP  
 SCF energy = -1004.40111676642 Hartree

Thermochemical properties at 298.15 K  
 Chemical potential = 0.415366 Hartree  
 Entropy = 0.000268 Hartree/K  
 Inner energy = 0.494367 Hartree  
 ZPE = 0.470237 Hartree  
 Enthalpy = 0.495311 Hartree

Single point energy at PBE0-D4/TZVP COSMO( $\infty$ )  
 SCF energy = -1005.82471792023 Hartree

Coordinates:

|    | Atom | X       | Y       | Z       |
|----|------|---------|---------|---------|
| 1  | C    | 0.6542  | -0.9078 | -0.0950 |
| 2  | C    | 0.7446  | 0.5824  | 0.0074  |
| 3  | C    | 2.7707  | -0.2930 | -0.5215 |
| 4  | C    | 1.9352  | -1.3889 | -0.4285 |
| 5  | C    | 2.0835  | 0.9078  | -0.2628 |
| 6  | C    | -0.4153 | -1.7576 | 0.0885  |
| 7  | C    | -0.3395 | 1.4231  | 0.3072  |
| 8  | C    | -1.6464 | 1.0147  | 0.5717  |
| 9  | C    | -1.7458 | -1.5043 | 0.4191  |
| 10 | C    | -2.2536 | -0.2349 | 0.6269  |
| 11 | H    | 3.8277  | -0.3448 | -0.7492 |
| 12 | C    | 2.3305  | -2.8142 | -0.6293 |
| 13 | C    | 2.8027  | 2.2331  | -0.3709 |
| 14 | H    | -0.1742 | -2.8083 | -0.0494 |
| 15 | C    | -0.1390 | 2.9158  | 0.3784  |
| 16 | H    | -2.3314 | 1.8280  | 0.7800  |

|    |   |         |         |         |
|----|---|---------|---------|---------|
| 17 | C | -2.6861 | -2.6897 | 0.5524  |
| 18 | H | -3.3101 | -0.1873 | 0.8734  |
| 19 | H | -1.0863 | 3.4308  | 0.5245  |
| 20 | H | 0.5070  | 3.1907  | 1.2130  |
| 21 | H | 0.3076  | 3.3143  | -0.5313 |
| 22 | H | -2.0995 | -3.5918 | 0.3531  |
| 23 | C | -3.8107 | -2.6452 | -0.4816 |
| 24 | C | -3.2437 | -2.8182 | 1.9695  |
| 25 | H | -4.4312 | -3.5404 | -0.4172 |
| 26 | H | -4.4646 | -1.7849 | -0.3286 |
| 27 | H | -3.4152 | -2.5822 | -1.4954 |
| 28 | H | -2.4429 | -2.8777 | 2.7066  |
| 29 | H | -3.8726 | -1.9663 | 2.2336  |
| 30 | H | -3.8563 | -3.7161 | 2.0646  |
| 31 | H | 1.7729  | -3.2896 | -1.4393 |
| 32 | H | 3.3875  | -2.8853 | -0.8827 |
| 33 | H | 2.1750  | -3.4178 | 0.2677  |
| 34 | C | 4.1904  | 2.1342  | 0.2353  |
| 35 | C | 5.3599  | 2.3357  | -0.4762 |
| 36 | C | 6.6135  | 2.2378  | 0.1254  |
| 37 | C | 6.7111  | 1.9327  | 1.4748  |
| 38 | C | 5.5403  | 1.7256  | 2.2079  |
| 39 | C | 4.3122  | 1.8240  | 1.5928  |
| 40 | H | 5.3234  | 2.5772  | -1.5303 |
| 41 | H | 7.4932  | 2.4051  | -0.4810 |
| 42 | H | 5.6127  | 1.4847  | 3.2606  |
| 43 | H | 3.4161  | 1.6440  | 2.1755  |
| 44 | C | 2.8009  | 2.7163  | -1.8215 |
| 45 | H | 2.2829  | 2.9866  | 0.2186  |
| 46 | H | 3.3074  | 2.0076  | -2.4782 |
| 47 | H | 1.7783  | 2.8087  | -2.1871 |
| 48 | H | 3.2840  | 3.6895  | -1.9250 |
| 49 | C | 9.0727  | 2.0142  | 1.4645  |
| 50 | O | 7.8695  | 1.8155  | 2.1564  |
| 51 | H | 9.8745  | 1.8763  | 2.1868  |
| 52 | H | 9.1508  | 3.0239  | 1.0479  |
| 53 | H | 9.2095  | 1.2923  | 0.6525  |

**Guaiazulene-Me2N-Ph-cation**

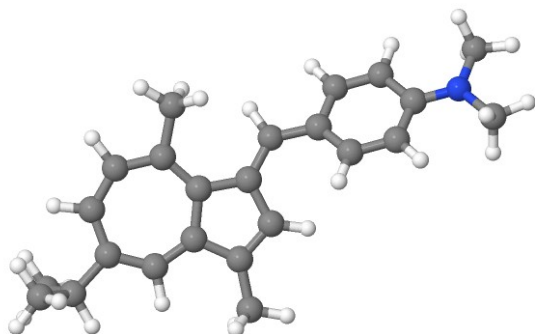

Geometry optimization: PBEh-3c/mSVP  
 SCF energy = -983.76073486451 Hartree

Thermochemical properties at 298.15 K  
 Chemical potential = 0.418637 Hartree  
 Entropy = 0.000267 Hartree/K  
 Inner energy = 0.497345 Hartree  
 ZPE = 0.473217 Hartree  
 Enthalpy = 0.49829 Hartree

Single point energy at PBE0-D4/TZVP COSMO( $\infty$ )  
 SCF energy = -985.20506378291 Hartree

Coordinates:

|    | Atom | X       | Y       | Z       |
|----|------|---------|---------|---------|
| 1  | C    | 0.6331  | -0.9632 | 0.3189  |
| 2  | C    | 0.7689  | 0.4758  | 0.2003  |
| 3  | C    | 2.8486  | -0.5346 | 0.2366  |
| 4  | C    | 1.9439  | -1.5442 | 0.3436  |
| 5  | C    | 2.1932  | 0.7358  | 0.1248  |
| 6  | C    | -0.5009 | -1.7639 | 0.3722  |
| 7  | C    | -0.2698 | 1.4031  | 0.2768  |
| 8  | C    | -1.6370 | 1.0791  | 0.2981  |
| 9  | C    | -1.8449 | -1.4327 | 0.3318  |
| 10 | C    | -2.3170 | -0.1194 | 0.2909  |
| 11 | H    | 3.9137  | -0.6821 | 0.1402  |
| 12 | C    | 2.2447  | -3.0013 | 0.4184  |
| 13 | C    | 2.8351  | 1.9243  | -0.1753 |
| 14 | H    | -0.2951 | -2.8267 | 0.4417  |
| 15 | C    | 0.0076  | 2.8813  | 0.3395  |
| 16 | H    | -2.2912 | 1.9424  | 0.3200  |
| 17 | C    | -2.8635 | -2.5527 | 0.3601  |
| 18 | H    | -3.3956 | -0.0099 | 0.2811  |
| 19 | H    | -0.8634 | 3.4235  | 0.7002  |

|    |   |         |         |         |
|----|---|---------|---------|---------|
| 20 | H | 0.8350  | 3.1156  | 1.0066  |
| 21 | H | 0.2389  | 3.2860  | -0.6477 |
| 22 | H | -2.3103 | -3.4956 | 0.3798  |
| 23 | C | -3.7269 | -2.5536 | -0.9018 |
| 24 | C | -3.7195 | -2.4957 | 1.6261  |
| 25 | H | -4.3952 | -3.4145 | -0.8956 |
| 26 | H | -4.3525 | -1.6623 | -0.9716 |
| 27 | H | -3.1214 | -2.6092 | -1.8061 |
| 28 | H | -3.1087 | -2.5126 | 2.5284  |
| 29 | H | -4.3410 | -1.5994 | 1.6593  |
| 30 | H | -4.3905 | -3.3538 | 1.6625  |
| 31 | H | 1.8155  | -3.5509 | -0.4215 |
| 32 | H | 3.3188  | -3.1748 | 0.4026  |
| 33 | H | 1.8585  | -3.4496 | 1.3358  |
| 34 | H | 2.2374  | 2.7171  | -0.6031 |
| 35 | C | 4.2069  | 2.2456  | -0.0571 |
| 36 | C | 4.7086  | 3.3487  | -0.7822 |
| 37 | C | 6.0245  | 3.7120  | -0.7436 |
| 38 | C | 6.9470  | 3.0059  | 0.0699  |
| 39 | C | 6.4350  | 1.9411  | 0.8585  |
| 40 | C | 5.1203  | 1.5784  | 0.7889  |
| 41 | H | 4.0339  | 3.9137  | -1.4142 |
| 42 | H | 6.3470  | 4.5521  | -1.3401 |
| 43 | H | 7.0762  | 1.4170  | 1.5514  |
| 44 | H | 4.7697  | 0.8000  | 1.4527  |
| 45 | N | 8.2452  | 3.3462  | 0.1147  |
| 46 | C | 9.1686  | 2.6139  | 0.9578  |
| 47 | H | 8.9202  | 2.7133  | 2.0167  |
| 48 | H | 9.1902  | 1.5530  | 0.7026  |
| 49 | H | 10.1716 | 3.0036  | 0.8178  |
| 50 | C | 8.7363  | 4.4660  | -0.6630 |
| 51 | H | 8.2557  | 5.4024  | -0.3730 |
| 52 | H | 9.8028  | 4.5799  | -0.4981 |
| 53 | H | 8.5827  | 4.3119  | -1.7329 |



### Guaiazulene-Me<sub>2</sub>N-Ph-Me-product

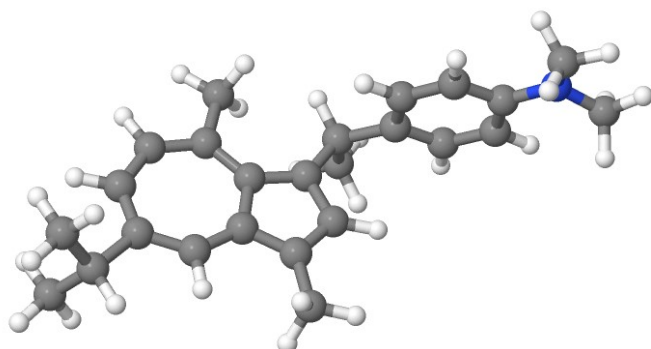

Geometry optimization: PBEh-3c/mSVP  
SCF energy = -1023.79833045501 Hartree

Thermochemical properties at 298.15 K  
Chemical potential = 0.454238 Hartree  
Entropy = 0.000283 Hartree/K  
Inner energy = 0.537744 Hartree  
ZPE = 0.511792 Hartree  
Enthalpy = 0.538689 Hartree

Single point energy at PBE0-D4/TZVP COSMO( $\infty$ )  
SCF energy = -1025.24143518534 Hartree

Coordinates:

|    | Atom | X       | Y       | Z       |
|----|------|---------|---------|---------|
| 1  | C    | 0.6054  | -0.9354 | -0.1195 |
| 2  | C    | 0.7199  | 0.5479  | 0.0460  |
| 3  | C    | 2.7277  | -0.3339 | -0.5376 |
| 4  | C    | 1.8768  | -1.4208 | -0.4811 |
| 5  | C    | 2.0608  | 0.8655  | -0.2252 |
| 6  | C    | -0.4779 | -1.7748 | 0.0270  |
| 7  | C    | -0.3460 | 1.3896  | 0.4024  |
| 8  | C    | -1.6590 | 0.9909  | 0.6528  |
| 9  | C    | -1.8043 | -1.5143 | 0.3687  |
| 10 | C    | -2.2892 | -0.2482 | 0.6417  |
| 11 | H    | 3.7816  | -0.3906 | -0.7781 |
| 12 | C    | 2.2492  | -2.8419 | -0.7452 |
| 13 | C    | 2.7939  | 2.1859  | -0.3015 |
| 14 | H    | -0.2548 | -2.8218 | -0.1605 |
| 15 | C    | -0.1161 | 2.8713  | 0.5599  |
| 16 | H    | -2.3276 | 1.8039  | 0.9100  |
| 17 | C    | -2.7663 | -2.6875 | 0.4402  |

|    |   |         |         |         |
|----|---|---------|---------|---------|
| 18 | H | -3.3445 | -0.1945 | 0.8920  |
| 19 | H | -1.0489 | 3.3917  | 0.7675  |
| 20 | H | 0.5604  | 3.0819  | 1.3887  |
| 21 | H | 0.3107  | 3.3186  | -0.3366 |
| 22 | H | -2.1961 | -3.5889 | 0.1948  |
| 23 | C | -3.8881 | -2.5688 | -0.5910 |
| 24 | C | -3.3291 | -2.8794 | 1.8480  |
| 25 | H | -4.5249 | -3.4549 | -0.5740 |
| 26 | H | -4.5265 | -1.7059 | -0.3941 |
| 27 | H | -3.4894 | -2.4603 | -1.5996 |
| 28 | H | -2.5312 | -2.9927 | 2.5819  |
| 29 | H | -3.9422 | -2.0306 | 2.1557  |
| 30 | H | -3.9590 | -3.7692 | 1.8953  |
| 31 | H | 1.6838  | -3.2720 | -1.5751 |
| 32 | H | 3.3049  | -2.9182 | -1.0030 |
| 33 | H | 2.0843  | -3.4823 | 0.1241  |
| 34 | C | 4.2026  | 2.0488  | 0.2440  |
| 35 | C | 5.3511  | 2.2326  | -0.5108 |
| 36 | C | 6.6202  | 2.0937  | 0.0332  |
| 37 | C | 6.7994  | 1.7692  | 1.3830  |
| 38 | C | 5.6361  | 1.5699  | 2.1460  |
| 39 | C | 4.3840  | 1.7098  | 1.5827  |
| 40 | H | 5.2794  | 2.4891  | -1.5599 |
| 41 | H | 7.4702  | 2.2451  | -0.6168 |
| 42 | H | 5.6993  | 1.2990  | 3.1903  |
| 43 | H | 3.5135  | 1.5329  | 2.2047  |
| 44 | C | 2.7437  | 2.7290  | -1.7303 |
| 45 | H | 2.3039  | 2.9197  | 0.3366  |
| 46 | H | 3.2121  | 2.0402  | -2.4348 |
| 47 | H | 1.7098  | 2.8532  | -2.0524 |
| 48 | H | 3.2410  | 3.6971  | -1.8120 |
| 49 | C | 9.2063  | 1.6639  | 1.0796  |
| 50 | N | 8.0547  | 1.6549  | 1.9410  |
| 51 | H | 10.1087 | 1.5802  | 1.6808  |
| 52 | H | 9.2813  | 2.6012  | 0.5235  |
| 53 | H | 9.2110  | 0.8424  | 0.3523  |
| 54 | C | 8.1885  | 1.1084  | 3.2650  |
| 55 | H | 7.8108  | 0.0823  | 3.3516  |
| 56 | H | 9.2387  | 1.1002  | 3.5478  |
| 57 | H | 7.6664  | 1.7193  | 4.0048  |

## Guaiazulene-Naphth-cation

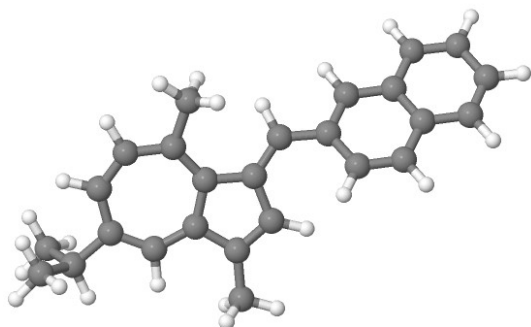

Geometry optimization: PBEh-3c/mSVP  
SCF energy = -1003.37070726947 Hartree

Thermochemical properties at 298.15 K  
Chemical potential = 0.393078 Hartree  
Entropy = 0.000255 Hartree/K  
Inner energy = 0.468278 Hartree  
ZPE = 0.445833 Hartree  
Enthalpy = 0.469222 Hartree

Single point energy at PBE0-D4/TZVP COSMO( $\infty$ )  
SCF energy = -1004.85298289034 Hartree

Coordinates:

|    | Atom | X       | Y       | Z       |
|----|------|---------|---------|---------|
| 1  | C    | 0.6845  | -0.9119 | 0.2681  |
| 2  | C    | 0.8132  | 0.5103  | 0.4651  |
| 3  | C    | 2.9057  | -0.4759 | 0.2354  |
| 4  | C    | 2.0031  | -1.4820 | 0.1418  |
| 5  | C    | 2.2453  | 0.7933  | 0.4033  |
| 6  | C    | -0.4466 | -1.7146 | 0.1681  |
| 7  | C    | -0.2166 | 1.3932  | 0.7784  |
| 8  | C    | -1.5861 | 1.0679  | 0.7492  |
| 9  | C    | -1.7902 | -1.3878 | 0.2229  |
| 10 | C    | -2.2659 | -0.0977 | 0.4815  |
| 11 | H    | 3.9694  | -0.5960 | 0.0989  |
| 12 | C    | 2.2974  | -2.9218 | -0.0961 |
| 13 | C    | 2.8613  | 2.0114  | 0.3098  |
| 14 | H    | -0.2382 | -2.7656 | 0.0005  |
| 15 | C    | 0.0637  | 2.8152  | 1.1826  |
| 16 | H    | -2.2382 | 1.9026  | 0.9775  |
| 17 | C    | -2.8085 | -2.4879 | 0.0187  |

|    |   |         |         |         |
|----|---|---------|---------|---------|
| 18 | H | -3.3445 | 0.0059  | 0.5119  |
| 19 | H | -0.7883 | 3.2421  | 1.7066  |
| 20 | H | 0.9235  | 2.8930  | 1.8447  |
| 21 | H | 0.2422  | 3.4499  | 0.3122  |
| 22 | H | -2.2567 | -3.4108 | -0.1785 |
| 23 | C | -3.6895 | -2.2092 | -1.2004 |
| 24 | C | -3.6454 | -2.7116 | 1.2797  |
| 25 | H | -4.3546 | -3.0540 | -1.3768 |
| 26 | H | -4.3188 | -1.3292 | -1.0606 |
| 27 | H | -3.0971 | -2.0592 | -2.1027 |
| 28 | H | -3.0218 | -2.9279 | 2.1467  |
| 29 | H | -4.2653 | -1.8463 | 1.5191  |
| 30 | H | -4.3168 | -3.5571 | 1.1337  |
| 31 | H | 1.8561  | -3.2788 | -1.0284 |
| 32 | H | 3.3702  | -3.0908 | -0.1595 |
| 33 | H | 1.9174  | -3.5517 | 0.7106  |
| 34 | H | 2.2420  | 2.8796  | 0.1352  |
| 35 | C | 8.7773  | 4.4369  | -0.3878 |
| 36 | C | 7.8429  | 5.2649  | -1.0404 |
| 37 | C | 8.3695  | 3.3132  | 0.2805  |
| 38 | C | 6.5131  | 4.9542  | -1.0142 |
| 39 | C | 7.0066  | 2.9645  | 0.3212  |
| 40 | C | 6.0630  | 3.7985  | -0.3348 |
| 41 | C | 6.5402  | 1.8219  | 1.0184  |
| 42 | C | 4.7036  | 3.4539  | -0.2815 |
| 43 | C | 5.2209  | 1.4926  | 1.0330  |
| 44 | C | 4.2678  | 2.3004  | 0.3504  |
| 45 | H | 9.8272  | 4.6953  | -0.4163 |
| 46 | H | 8.1848  | 6.1484  | -1.5616 |
| 47 | H | 9.0931  | 2.6840  | 0.7826  |
| 48 | H | 5.7923  | 5.5884  | -1.5148 |
| 49 | H | 7.2530  | 1.2162  | 1.5635  |
| 50 | H | 3.9851  | 4.0992  | -0.7750 |
| 51 | H | 4.8894  | 0.6492  | 1.6225  |

### Guaiazulene-Naphth-Me-product

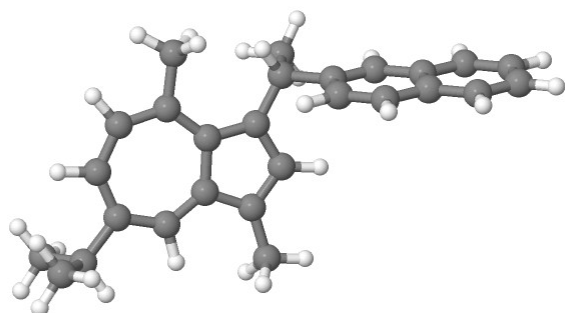

Geometry optimization: PBEh-3c/mSVP  
SCF energy = -1043.42580461029 Hartree

Thermochemical properties at 298.15 K  
Chemical potential = 0.430025 Hartree  
Entropy = 0.000269 Hartree/K  
Inner energy = 0.509164 Hartree  
ZPE = 0.485038 Hartree  
Enthalpy = 0.510109 Hartree

Single point energy at PBE0-D4/TZVP COSMO( $\infty$ )  
SCF energy = -1044.90247032596 Hartree

Coordinates:

|    | Atom | X       | Y       | Z       |
|----|------|---------|---------|---------|
| 1  | C    | 0.6930  | -0.8603 | -0.1821 |
| 2  | C    | 0.7605  | 0.6175  | 0.0399  |
| 3  | C    | 2.7839  | -0.1714 | -0.6215 |
| 4  | C    | 1.9703  | -1.2873 | -0.5941 |
| 5  | C    | 2.0846  | 0.9898  | -0.2428 |
| 6  | C    | -0.3554 | -1.7432 | -0.0346 |
| 7  | C    | -0.3283 | 1.4110  | 0.4355  |
| 8  | C    | -1.6179 | 0.9565  | 0.7098  |
| 9  | C    | -1.6773 | -1.5441 | 0.3603  |
| 10 | C    | -2.1998 | -0.3057 | 0.6872  |
| 11 | H    | 3.8336  | -0.1837 | -0.8863 |
| 12 | C    | 2.3825  | -2.6830 | -0.9253 |
| 13 | C    | 2.7804  | 2.3314  | -0.2543 |
| 14 | H    | -0.1014 | -2.7742 | -0.2661 |
| 15 | C    | -0.1539 | 2.8987  | 0.6083  |
| 16 | H    | -2.3101 | 1.7371  | 1.0024  |
| 17 | C    | -2.5915 | -2.7549 | 0.4305  |

|    |   |         |         |         |
|----|---|---------|---------|---------|
| 18 | H | -3.2472 | -0.2999 | 0.9732  |
| 19 | H | -1.1067 | 3.3824  | 0.8137  |
| 20 | H | 0.5077  | 3.1279  | 1.4446  |
| 21 | H | 0.2612  | 3.3691  | -0.2817 |
| 22 | H | -1.9990 | -3.6255 | 0.1325  |
| 23 | C | -3.7590 | -2.6467 | -0.5501 |
| 24 | C | -3.0872 | -3.0116 | 1.8531  |
| 25 | H | -4.3598 | -3.5575 | -0.5375 |
| 26 | H | -4.4217 | -1.8170 | -0.2981 |
| 27 | H | -3.4074 | -2.4897 | -1.5698 |
| 28 | H | -2.2556 | -3.1180 | 2.5497  |
| 29 | H | -3.7171 | -2.1963 | 2.2132  |
| 30 | H | -3.6820 | -3.9253 | 1.8968  |
| 31 | H | 1.8079  | -3.0996 | -1.7556 |
| 32 | H | 3.4321  | -2.7129 | -1.2149 |
| 33 | H | 2.2646  | -3.3620 | -0.0778 |
| 34 | C | 2.7575  | 2.9315  | -1.6594 |
| 35 | H | 2.2593  | 3.0258  | 0.4035  |
| 36 | H | 3.2694  | 2.2874  | -2.3756 |
| 37 | H | 1.7298  | 3.0355  | -2.0069 |
| 38 | H | 3.2229  | 3.9181  | -1.6868 |
| 39 | C | 9.0953  | 2.0818  | 1.4830  |
| 40 | C | 9.0052  | 2.5189  | 0.1477  |
| 41 | C | 7.9603  | 1.7874  | 2.1874  |
| 42 | C | 7.7837  | 2.6531  | -0.4532 |
| 43 | C | 6.6875  | 1.9167  | 1.5915  |
| 44 | C | 6.5952  | 2.3570  | 0.2495  |
| 45 | C | 5.4905  | 1.6214  | 2.2858  |
| 46 | C | 5.3187  | 2.4889  | -0.3501 |
| 47 | C | 4.2791  | 1.7555  | 1.6771  |
| 48 | C | 4.1708  | 2.1997  | 0.3347  |
| 49 | H | 10.0662 | 1.9799  | 1.9495  |
| 50 | H | 9.9082  | 2.7493  | -0.4022 |
| 51 | H | 8.0268  | 1.4504  | 3.2149  |
| 52 | H | 7.7157  | 2.9904  | -1.4804 |
| 53 | H | 5.5485  | 1.2825  | 3.3132  |
| 54 | H | 5.2769  | 2.8296  | -1.3773 |
| 55 | H | 3.3731  | 1.5093  | 2.2182  |

### Guaiazulene-F2CHO-Ph-cation

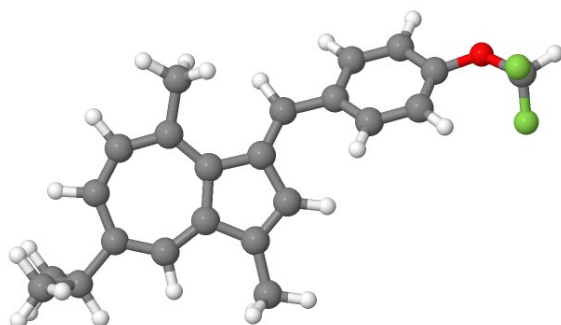

Geometry optimization: PBEh-3c/mSVP  
SCF energy = -1162.46563291819 Hartree

Thermochemical properties at 298.15 K  
Chemical potential = 0.360095 Hartree  
Entropy = 0.000269 Hartree/K  
Inner energy = 0.439473 Hartree  
ZPE = 0.415789 Hartree  
Enthalpy = 0.440417 Hartree

Single point energy at PBE0-D4/TZVP COSMO( $\infty$ )  
SCF energy = -1164.18215485954 Hartree

Coordinates:

|    | Atom | X       | Y       | Z      |
|----|------|---------|---------|--------|
| 1  | C    | 0.6456  | -0.8866 | 0.3599 |
| 2  | C    | 0.7267  | 0.5520  | 0.3500 |
| 3  | C    | 2.8537  | -0.3877 | 0.3695 |
| 4  | C    | 1.9837  | -1.4256 | 0.3846 |
| 5  | C    | 2.1529  | 0.8702  | 0.3185 |
| 6  | C    | -0.4574 | -1.7328 | 0.3211 |
| 7  | C    | -0.3411 | 1.4370  | 0.4730 |
| 8  | C    | -1.6981 | 1.0653  | 0.4212 |
| 9  | C    | -1.8099 | -1.4467 | 0.2576 |
| 10 | C    | -2.3318 | -0.1490 | 0.2954 |
| 11 | H    | 3.9259  | -0.4906 | 0.2999 |
| 12 | C    | 2.3257  | -2.8744 | 0.3756 |
| 13 | C    | 2.7451  | 2.0813  | 0.0900 |
| 14 | H    | -0.2134 | -2.7894 | 0.3218 |
| 15 | C    | -0.1201 | 2.9121  | 0.6709 |
| 16 | H    | -2.3830 | 1.9023  | 0.4867 |
| 17 | C    | -2.7867 | -2.5980 | 0.1665 |
| 18 | H    | -3.4126 | -0.0781 | 0.2527 |

|    |   |         |         |         |
|----|---|---------|---------|---------|
| 19 | H | -1.0135 | 3.3858  | 1.0710  |
| 20 | H | 0.6931  | 3.1167  | 1.3642  |
| 21 | H | 0.0998  | 3.4131  | -0.2741 |
| 22 | H | -2.2022 | -3.5216 | 0.1466  |
| 23 | C | -3.5952 | -2.5362 | -1.1305 |
| 24 | C | -3.6963 | -2.6541 | 1.3952  |
| 25 | H | -4.2317 | -3.4168 | -1.2120 |
| 26 | H | -4.2491 | -1.6634 | -1.1663 |
| 27 | H | -2.9513 | -2.5096 | -2.0092 |
| 28 | H | -3.1247 | -2.7124 | 2.3210  |
| 29 | H | -4.3528 | -1.7848 | 1.4599  |
| 30 | H | -4.3351 | -3.5352 | 1.3430  |
| 31 | H | 1.9413  | -3.3777 | -0.5136 |
| 32 | H | 3.4041  | -3.0167 | 0.3880  |
| 33 | H | 1.9205  | -3.3913 | 1.2477  |
| 34 | H | 2.1202  | 2.8998  | -0.2379 |
| 35 | C | 4.1410  | 2.4108  | 0.1692  |
| 36 | C | 4.6248  | 3.4701  | -0.6145 |
| 37 | C | 5.9524  | 3.8217  | -0.5925 |
| 38 | C | 6.8385  | 3.1518  | 0.2517  |
| 39 | C | 6.3733  | 2.1326  | 1.0850  |
| 40 | C | 5.0429  | 1.7744  | 1.0323  |
| 41 | H | 3.9499  | 4.0065  | -1.2698 |
| 42 | H | 6.3215  | 4.6235  | -1.2175 |
| 43 | H | 7.0134  | 1.6254  | 1.7896  |
| 44 | H | 4.6905  | 1.0221  | 1.7248  |
| 45 | O | 8.1120  | 3.6015  | 0.1852  |
| 46 | C | 9.1409  | 3.0670  | 0.9085  |
| 47 | F | 8.9159  | 3.1856  | 2.2272  |
| 48 | F | 9.2851  | 1.7580  | 0.6450  |
| 49 | H | 10.0468 | 3.6057  | 0.6352  |

**Guiazulene-F2CHO-Ph-Me-product**

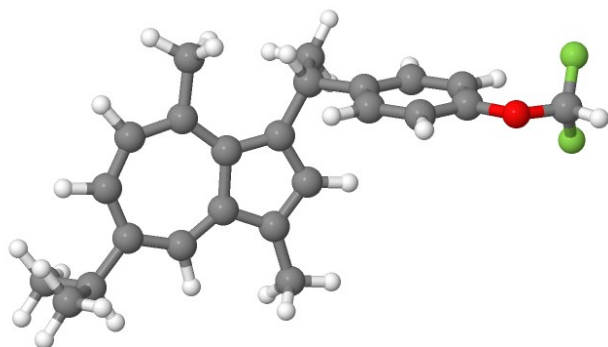



Geometry optimization: PBEh-3c/mSVP  
SCF energy = -1202.52099447504 Hartree

Thermochemical properties at 298.15 K  
Chemical potential = 0.398821 Hartree  
Entropy = 0.000273 Hartree/K  
Inner energy = 0.479415 Hartree  
ZPE = 0.454868 Hartree  
Enthalpy = 0.480359 Hartree

Single point energy at PBE0-D4/TZVP COSMO( $\infty$ )  
SCF energy = -1204.23029812006 Hartree

Coordinates:

|    | Atom | X       | Y       | Z       |
|----|------|---------|---------|---------|
| 1  | C    | 0.6580  | -0.8756 | -0.1962 |
| 2  | C    | 0.7382  | 0.6137  | -0.0810 |
| 3  | C    | 2.7503  | -0.2366 | -0.6981 |
| 4  | C    | 1.9274  | -1.3403 | -0.5938 |
| 5  | C    | 2.0635  | 0.9538  | -0.3921 |
| 6  | C    | -0.3897 | -1.7386 | 0.0409  |
| 7  | C    | -0.3465 | 1.4432  | 0.2478  |
| 8  | C    | -1.6313 | 1.0188  | 0.5825  |
| 9  | C    | -1.6999 | -1.5028 | 0.4557  |
| 10 | C    | -2.2134 | -0.2399 | 0.6877  |
| 11 | H    | 3.7994  | -0.2774 | -0.9624 |
| 12 | C    | 2.3255  | -2.7586 | -0.8336 |
| 13 | C    | 2.7822  | 2.2815  | -0.4639 |
| 14 | H    | -0.1449 | -2.7856 | -0.1164 |
| 15 | C    | -0.1716 | 2.9408  | 0.2688  |
| 16 | H    | -2.3191 | 1.8245  | 0.8107  |
| 17 | C    | -2.6114 | -2.7015 | 0.6543  |
| 18 | H    | -3.2539 | -0.2066 | 0.9963  |
| 19 | H    | -1.1306 | 3.4439  | 0.3746  |
| 20 | H    | 0.4498  | 3.2583  | 1.1077  |
| 21 | H    | 0.2883  | 3.3134  | -0.6447 |
| 22 | H    | -2.0244 | -3.5957 | 0.4229  |
| 23 | C    | -3.8002 | -2.6809 | -0.3059 |
| 24 | C    | -3.0745 | -2.8289 | 2.1050  |
| 25 | H    | -4.3986 | -3.5871 | -0.2002 |
| 26 | H    | -4.4589 | -1.8323 | -0.1132 |
| 27 | H    | -3.4712 | -2.6140 | -1.3429 |
| 28 | H    | -2.2272 | -2.8670 | 2.7897  |
| 29 | H    | -3.7020 | -1.9871 | 2.4030  |

|    |   |         |         |         |
|----|---|---------|---------|---------|
| 30 | H | -3.6620 | -3.7375 | 2.2453  |
| 31 | H | 1.7381  | -3.2257 | -1.6272 |
| 32 | H | 3.3714  | -2.8166 | -1.1323 |
| 33 | H | 2.2127  | -3.3776 | 0.0592  |
| 34 | C | 4.1485  | 2.1625  | 0.1857  |
| 35 | C | 5.3436  | 2.3480  | -0.4899 |
| 36 | C | 6.5785  | 2.2178  | 0.1398  |
| 37 | C | 6.6180  | 1.8975  | 1.4856  |
| 38 | C | 5.4322  | 1.7113  | 2.1871  |
| 39 | C | 4.2211  | 1.8398  | 1.5406  |
| 40 | H | 5.3421  | 2.6000  | -1.5418 |
| 41 | H | 7.4708  | 2.3732  | -0.4468 |
| 42 | H | 5.4705  | 1.4596  | 3.2388  |
| 43 | H | 3.3062  | 1.6707  | 2.0961  |
| 44 | C | 2.8278  | 2.7892  | -1.9047 |
| 45 | H | 2.2478  | 3.0257  | 0.1238  |
| 46 | H | 3.3447  | 2.0872  | -2.5604 |
| 47 | H | 1.8166  | 2.8990  | -2.2964 |
| 48 | H | 3.3230  | 3.7590  | -1.9779 |
| 49 | C | 9.0008  | 1.8457  | 1.7507  |
| 50 | O | 7.7538  | 1.7325  | 2.2470  |
| 51 | H | 9.7025  | 1.6670  | 2.5654  |
| 52 | F | 9.2306  | 3.0701  | 1.2283  |
| 53 | F | 9.2338  | 0.9573  | 0.7603  |

### Guaiazulene-Fc-cation

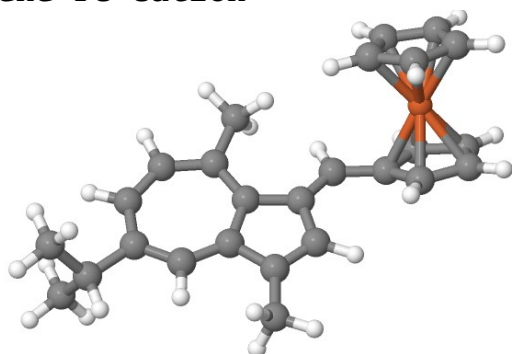

Geometry optimization: PBEh-3c/mSVP  
SCF energy = -2267.48535586035 Hartree

Thermochemical properties at 298.15 K  
Chemical potential = 0.412013 Hartree  
Entropy = 0.000275 Hartree/K  
Inner energy = 0.49304 Hartree  
ZPE = 0.46877 Hartree  
Enthalpy = 0.493984 Hartree

Single point energy at PBE0-D4/TZVP COSMO( $\infty$ )  
SCF energy = -2269.57793650069 Hartree

Coordinates:

|    | Atom | X       | Y       | Z       |
|----|------|---------|---------|---------|
| 1  | C    | 0.7525  | -0.7090 | 0.3399  |
| 2  | C    | 0.8660  | 0.6014  | -0.2589 |
| 3  | C    | 2.9644  | -0.2556 | 0.2390  |
| 4  | C    | 2.0733  | -1.1957 | 0.6399  |
| 5  | C    | 2.2941  | 0.8718  | -0.3488 |
| 6  | C    | -0.3663 | -1.4892 | 0.6087  |
| 7  | C    | -0.1914 | 1.4518  | -0.5753 |
| 8  | C    | -1.5514 | 1.0990  | -0.5171 |
| 9  | C    | -1.7108 | -1.2485 | 0.3844  |
| 10 | C    | -2.2067 | -0.0517 | -0.1399 |
| 11 | H    | 4.0361  | -0.3764 | 0.2731  |
| 12 | C    | 2.3875  | -2.5200 | 1.2438  |
| 13 | C    | 2.9365  | 1.8994  | -0.9905 |
| 14 | H    | -0.1435 | -2.4533 | 1.0534  |
| 15 | C    | 0.0526  | 2.8662  | -1.0279 |
| 16 | H    | -2.2219 | 1.8869  | -0.8390 |
| 17 | C    | -2.7065 | -2.3295 | 0.7455  |
| 18 | H    | -3.2840 | 0.0020  | -0.2466 |

|    |    |         |         |         |
|----|----|---------|---------|---------|
| 19 | H  | -0.8560 | 3.4591  | -0.9565 |
| 20 | H  | 0.8119  | 3.3631  | -0.4265 |
| 21 | H  | 0.3673  | 2.9014  | -2.0727 |
| 22 | H  | -2.1382 | -3.1813 | 1.1291  |
| 23 | C  | -3.4779 | -2.8080 | -0.4854 |
| 24 | C  | -3.6502 | -1.8675 | 1.8573  |
| 25 | H  | -4.1263 | -3.6412 | -0.2160 |
| 26 | H  | -4.1160 | -2.0259 | -0.8995 |
| 27 | H  | -2.8092 | -3.1489 | -1.2751 |
| 28 | H  | -3.1043 | -1.5403 | 2.7419  |
| 29 | H  | -4.2912 | -1.0454 | 1.5354  |
| 30 | H  | -4.3037 | -2.6872 | 2.1540  |
| 31 | H  | 2.0276  | -3.3451 | 0.6264  |
| 32 | H  | 3.4621  | -2.6466 | 1.3577  |
| 33 | H  | 1.9415  | -2.6311 | 2.2339  |
| 34 | H  | 2.3606  | 2.5510  | -1.6306 |
| 35 | Fe | 4.9362  | 3.9348  | -0.0829 |
| 36 | C  | 3.6529  | 5.5389  | -0.0110 |
| 37 | C  | 3.4570  | 4.7066  | 1.1221  |
| 38 | C  | 4.6757  | 4.6417  | 1.8355  |
| 39 | C  | 5.6275  | 5.4331  | 1.1461  |
| 40 | C  | 4.9931  | 5.9918  | 0.0109  |
| 41 | C  | 4.9248  | 3.0981  | -1.9395 |
| 42 | C  | 6.2600  | 3.3079  | -1.5654 |
| 43 | C  | 6.5046  | 2.5955  | -0.3620 |
| 44 | C  | 5.3265  | 1.9274  | 0.0130  |
| 45 | C  | 4.3266  | 2.2064  | -0.9794 |
| 46 | H  | 2.9096  | 5.7991  | -0.7503 |
| 47 | H  | 2.5396  | 4.2053  | 1.3969  |
| 48 | H  | 4.8519  | 4.0837  | 2.7431  |
| 49 | H  | 6.6557  | 5.5875  | 1.4376  |
| 50 | H  | 5.4564  | 6.6383  | -0.7196 |
| 51 | H  | 4.4377  | 3.4927  | -2.8197 |
| 52 | H  | 6.9758  | 3.9214  | -2.0915 |
| 53 | H  | 7.4329  | 2.5915  | 0.1892  |
| 54 | H  | 5.2033  | 1.3372  | 0.9081  |

### Guaiazulene-Fc-Me-product

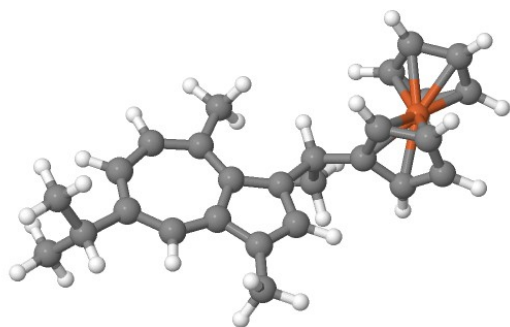

Geometry optimization: PBEh-3c/mSVP  
SCF energy = -2307.53534702153 Hartree

Thermochemical properties at 298.15 K  
Chemical potential = 0.450216 Hartree  
Entropy = 0.000283 Hartree/K  
Inner energy = 0.533708 Hartree  
ZPE = 0.507764 Hartree  
Enthalpy = 0.534652 Hartree

Single point energy at PBE0-D4/TZVP COSMO( $\infty$ )  
SCF energy = -2309.62239257234 Hartree

Coordinates:

|    | Atom | X       | Y       | Z       |
|----|------|---------|---------|---------|
| 1  | C    | 0.6777  | -1.0290 | -0.0008 |
| 2  | C    | 0.8688  | 0.4473  | -0.1533 |
| 3  | C    | 2.8374  | -0.6350 | -0.4732 |
| 4  | C    | 1.9275  | -1.6414 | -0.2047 |
| 5  | C    | 2.2300  | 0.6326  | -0.4520 |
| 6  | C    | -0.4556 | -1.7638 | 0.2786  |
| 7  | C    | -0.1493 | 1.3988  | 0.0065  |
| 8  | C    | -1.4899 | 1.1285  | 0.2861  |
| 9  | C    | -1.7735 | -1.3719 | 0.5030  |
| 10 | C    | -2.1917 | -0.0524 | 0.4938  |
| 11 | H    | 3.8903  | -0.7971 | -0.6648 |
| 12 | C    | 2.2293  | -3.1019 | -0.1410 |
| 13 | C    | 3.0170  | 1.8735  | -0.8051 |
| 14 | H    | -0.2870 | -2.8362 | 0.3244  |
| 15 | C    | 0.1678  | 2.8691  | -0.1000 |
| 16 | H    | -2.1143 | 2.0111  | 0.3589  |
| 17 | C    | -2.8050 | -2.4543 | 0.7711  |

|    |    |         |         |         |
|----|----|---------|---------|---------|
| 18 | H  | -3.2488 | 0.1054  | 0.6857  |
| 19 | H  | -0.7324 | 3.4715  | 0.0010  |
| 20 | H  | 0.8539  | 3.1821  | 0.6877  |
| 21 | H  | 0.6218  | 3.1266  | -1.0556 |
| 22 | H  | -2.2801 | -3.4144 | 0.7472  |
| 23 | C  | -3.8779 | -2.4986 | -0.3165 |
| 24 | C  | -3.4311 | -2.3169 | 2.1584  |
| 25 | H  | -4.5676 | -3.3269 | -0.1468 |
| 26 | H  | -4.4693 | -1.5814 | -0.3356 |
| 27 | H  | -3.4357 | -2.6256 | -1.3047 |
| 28 | H  | -2.6695 | -2.3101 | 2.9383  |
| 29 | H  | -4.0068 | -1.3943 | 2.2516  |
| 30 | H  | -4.1118 | -3.1456 | 2.3595  |
| 31 | H  | 1.6658  | -3.6751 | -0.8808 |
| 32 | H  | 3.2862  | -3.2825 | -0.3330 |
| 33 | H  | 2.0039  | -3.5295 | 0.8387  |
| 34 | C  | 2.9279  | 2.1524  | -2.3074 |
| 35 | H  | 2.6082  | 2.7357  | -0.2812 |
| 36 | H  | 3.3173  | 1.3128  | -2.8843 |
| 37 | H  | 1.8922  | 2.2916  | -2.6168 |
| 38 | H  | 3.4903  | 3.0471  | -2.5806 |
| 39 | Fe | 5.8122  | 3.2514  | -0.1171 |
| 40 | C  | 5.9388  | 4.7806  | -1.4874 |
| 41 | C  | 4.8753  | 5.0221  | -0.5820 |
| 42 | C  | 5.4194  | 5.0873  | 0.7247  |
| 43 | C  | 6.8183  | 4.8856  | 0.6271  |
| 44 | C  | 7.1393  | 4.6965  | -0.7402 |
| 45 | C  | 5.5940  | 1.4854  | -1.1366 |
| 46 | C  | 6.7210  | 1.4161  | -0.2794 |
| 47 | C  | 6.2717  | 1.6190  | 1.0479  |
| 48 | C  | 4.8708  | 1.8185  | 1.0064  |
| 49 | C  | 4.4437  | 1.7414  | -0.3448 |
| 50 | H  | 5.8493  | 4.6742  | -2.5585 |
| 51 | H  | 3.8325  | 5.1331  | -0.8422 |
| 52 | H  | 4.8646  | 5.2545  | 1.6361  |
| 53 | H  | 7.5167  | 4.8738  | 1.4508  |
| 54 | H  | 8.1252  | 4.5145  | -1.1415 |
| 55 | H  | 5.6161  | 1.3778  | -2.2114 |
| 56 | H  | 7.7423  | 1.2455  | -0.5868 |
| 57 | H  | 6.8898  | 1.6320  | 1.9335  |
| 58 | H  | 4.2267  | 1.9943  | 1.8563  |

### Guaiazulene-Cl-Ph-cation

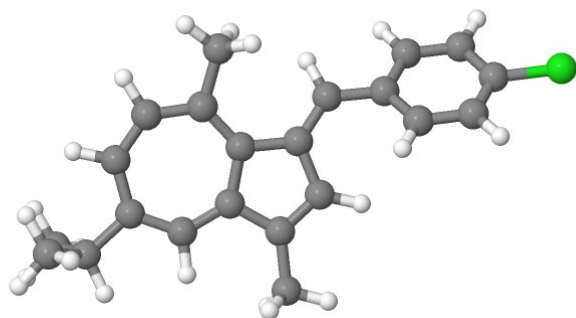

Geometry optimization: PBEh-3c/mSVP  
SCF energy = -1309.16560170125 Hartree

Thermochemical properties at 298.15 K  
Chemical potential = 0.336071 Hartree  
Entropy = 0.000247 Hartree/K  
Inner energy = 0.408622 Hartree  
ZPE = 0.387528 Hartree  
Enthalpy = 0.409566 Hartree

Single point energy at PBE0-D4/TZVP COSMO( $\infty$ )  
SCF energy = -1310.79515978826 Hartree

Coordinates:

|    | Atom | X       | Y       | Z      |
|----|------|---------|---------|--------|
| 1  | C    | 0.6423  | -0.9090 | 0.2845 |
| 2  | C    | 0.7500  | 0.5262  | 0.3101 |
| 3  | C    | 2.8596  | -0.4546 | 0.2113 |
| 4  | C    | 1.9706  | -1.4745 | 0.2333 |
| 5  | C    | 2.1827  | 0.8189  | 0.2288 |
| 6  | C    | -0.4762 | -1.7356 | 0.2776 |
| 7  | C    | -0.2948 | 1.4273  | 0.4943 |
| 8  | C    | -1.6599 | 1.0799  | 0.4956 |
| 9  | C    | -1.8248 | -1.4257 | 0.2876 |
| 10 | C    | -2.3210 | -0.1200 | 0.3771 |
| 11 | H    | 3.9258  | -0.5749 | 0.0935 |
| 12 | C    | 2.2812  | -2.9286 | 0.1682 |
| 13 | C    | 2.7938  | 2.0216  | 0.0244 |
| 14 | H    | -0.2514 | -2.7957 | 0.2404 |
| 15 | C    | -0.0388 | 2.8946  | 0.7052 |
| 16 | H    | -2.3257 | 1.9274  | 0.6069 |
| 17 | C    | -2.8250 | -2.5580 | 0.2204 |

|    |    |         |         |         |
|----|----|---------|---------|---------|
| 18 | H  | -3.4011 | -0.0296 | 0.3869  |
| 19 | H  | -0.9134 | 3.3832  | 1.1280  |
| 20 | H  | 0.7918  | 3.0727  | 1.3852  |
| 21 | H  | 0.1740  | 3.4018  | -0.2381 |
| 22 | H  | -2.2587 | -3.4908 | 0.1546  |
| 23 | C  | -3.6925 | -2.4558 | -1.0354 |
| 24 | C  | -3.6763 | -2.6234 | 1.4898  |
| 25 | H  | -4.3467 | -3.3244 | -1.1040 |
| 26 | H  | -4.3327 | -1.5724 | -1.0223 |
| 27 | H  | -3.0906 | -2.4214 | -1.9431 |
| 28 | H  | -3.0628 | -2.7105 | 2.3861  |
| 29 | H  | -4.3139 | -1.7452 | 1.6027  |
| 30 | H  | -4.3321 | -3.4927 | 1.4506  |
| 31 | H  | 1.8449  | -3.3984 | -0.7153 |
| 32 | H  | 3.3558  | -3.0923 | 0.1255  |
| 33 | H  | 1.9066  | -3.4619 | 1.0440  |
| 34 | H  | 2.1819  | 2.8726  | -0.2377 |
| 35 | C  | 4.2071  | 2.3040  | 0.0577  |
| 36 | C  | 4.6964  | 3.3514  | -0.7350 |
| 37 | C  | 6.0393  | 3.6624  | -0.7586 |
| 38 | C  | 6.9160  | 2.9499  | 0.0515  |
| 39 | C  | 6.4494  | 1.9414  | 0.8887  |
| 40 | C  | 5.1082  | 1.6226  | 0.8880  |
| 41 | H  | 4.0159  | 3.9146  | -1.3614 |
| 42 | H  | 6.4080  | 4.4577  | -1.3909 |
| 43 | Cl | 8.5816  | 3.3373  | 0.0432  |
| 44 | H  | 7.1339  | 1.4246  | 1.5466  |
| 45 | H  | 4.7505  | 0.8758  | 1.5840  |



### Guaiazulene-Cl-Ph-Me-product

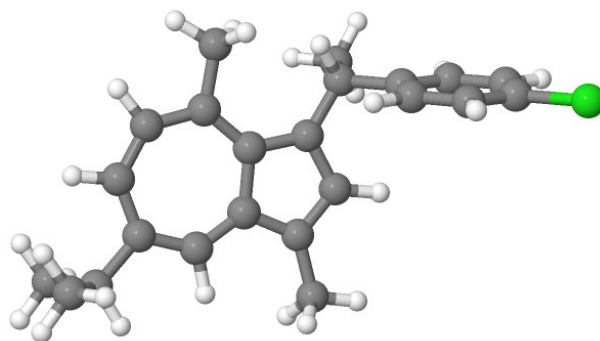

Geometry optimization: PBEh-3c/mSVP  
SCF energy = -1349.22534723244 Hartree

Thermochemical properties at 298.15 K  
Chemical potential = 0.373025 Hartree  
Entropy = 0.00026 Hartree/K  
Inner energy = 0.449581 Hartree  
ZPE = 0.426768 Hartree  
Enthalpy = 0.450525 Hartree

Single point energy at PBE0-D4/TZVP COSMO( $\infty$ )  
SCF energy = -1350.84496240613 Hartree

Coordinates:

|    | Atom | X       | Y       | Z       |
|----|------|---------|---------|---------|
| 1  | C    | 0.6365  | -0.9521 | -0.1015 |
| 2  | C    | 0.7781  | 0.5318  | 0.0212  |
| 3  | C    | 2.7667  | -0.4038 | -0.5493 |
| 4  | C    | 1.8960  | -1.4721 | -0.4581 |
| 5  | C    | 2.1236  | 0.8154  | -0.2643 |
| 6  | C    | -0.4604 | -1.7675 | 0.0788  |
| 7  | C    | -0.2716 | 1.4043  | 0.3511  |
| 8  | C    | -1.5892 | 1.0370  | 0.6220  |
| 9  | C    | -1.7785 | -1.4738 | 0.4239  |
| 10 | C    | -2.2398 | -0.1911 | 0.6585  |
| 11 | H    | 3.8173  | -0.4898 | -0.7962 |
| 12 | C    | 2.2394  | -2.9067 | -0.6856 |
| 13 | C    | 2.8819  | 2.1182  | -0.3722 |
| 14 | H    | -0.2571 | -2.8232 | -0.0788 |
| 15 | C    | -0.0171 | 2.8871  | 0.4497  |
| 16 | H    | -2.2429 | 1.8696  | 0.8534  |
| 17 | C    | -2.7595 | -2.6272 | 0.5418  |
| 18 | H    | -3.2919 | -0.1111 | 0.9148  |
| 19 | H    | -0.9416 | 3.4311  | 0.6320  |
| 20 | H    | 0.6588  | 3.1209  | 1.2730  |
| 21 | H    | 0.4191  | 3.2908  | -0.4629 |
| 22 | H    | -2.2063 | -3.5460 | 0.3238  |
| 23 | C    | -3.8860 | -2.5239 | -0.4859 |

|    |    |         |         |         |
|----|----|---------|---------|---------|
| 24 | C  | -3.3152 | -2.7609 | 1.9591  |
| 25 | H  | -4.5375 | -3.3977 | -0.4344 |
| 26 | H  | -4.5085 | -1.6441 | -0.3145 |
| 27 | H  | -3.4928 | -2.4570 | -1.5003 |
| 28 | H  | -2.5143 | -2.8620 | 2.6915  |
| 29 | H  | -3.9130 | -1.8924 | 2.2413  |
| 30 | H  | -3.9587 | -3.6382 | 2.0408  |
| 31 | H  | 1.6596  | -3.3480 | -1.4994 |
| 32 | H  | 3.2913  | -3.0109 | -0.9485 |
| 33 | H  | 2.0690  | -3.5195 | 0.2022  |
| 34 | C  | 4.2733  | 1.9675  | 0.2147  |
| 35 | C  | 5.4386  | 2.1407  | -0.5194 |
| 36 | C  | 6.6909  | 1.9952  | 0.0655  |
| 37 | C  | 6.7817  | 1.6742  | 1.4061  |
| 38 | C  | 5.6339  | 1.4953  | 2.1654  |
| 39 | C  | 4.3978  | 1.6402  | 1.5648  |
| 40 | H  | 5.3920  | 2.3939  | -1.5699 |
| 41 | H  | 7.5871  | 2.1326  | -0.5238 |
| 42 | Cl | 8.3350  | 1.4921  | 2.1454  |
| 43 | H  | 5.7086  | 1.2426  | 3.2141  |
| 44 | H  | 3.5033  | 1.4821  | 2.1557  |
| 45 | C  | 2.8743  | 2.6170  | -1.8173 |
| 46 | H  | 2.3986  | 2.8825  | 0.2343  |
| 47 | H  | 3.3445  | 1.8987  | -2.4902 |
| 48 | H  | 1.8491  | 2.7470  | -2.1630 |
| 49 | H  | 3.3868  | 3.5752  | -1.9199 |

## Methyl anion affinity of guaiazulene arylmethylium cations

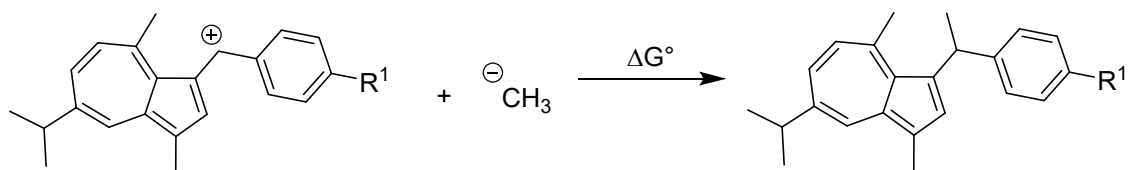

MAA =  $-\Delta G^\circ$ ; calculated at PBE0-D4/def2-TZVP (COSMO $^\infty$ ) level.

Mayr's electrophilicity was calculated according to the following equation based on the recommendation of van Vranken and coworkers.<sup>16</sup>

$$E = \text{MAA} \cdot 0.11 - 37.9$$

| Cation (Ar)                                        | $\epsilon_{\text{LUMO}}$ (Hartree) | $\Delta G^\circ$ (Hartree) | MAA (kJ.mol <sup>-1</sup> ) | Estimated Mayr's E |
|----------------------------------------------------|------------------------------------|----------------------------|-----------------------------|--------------------|
| 4-CH <sub>3</sub> -C <sub>6</sub> H <sub>4</sub>   | -0.1216                            | -0.110992                  | 291.4                       | -5.85              |
| 4-MeO-C <sub>6</sub> H <sub>4</sub>                | -0.1189                            | -0.109264                  | 286.9                       | -6.34              |
| 4-Me <sub>2</sub> N-C <sub>6</sub> H <sub>4</sub>  | -0.1127                            | -0.101945                  | 267.7                       | -8.46              |
| 2-Naphthyl                                         | -0.1238                            | -0.113714                  | 298.6                       | -5.05              |
| 4-F-C <sub>6</sub> H <sub>4</sub>                  | -0.1225                            | -0.112870                  | 296.3                       | -5.31              |
| 4-CHF <sub>2</sub> O-C <sub>6</sub> H <sub>4</sub> | -0.1220                            | -0.110591                  | 290.4                       | -5.96              |
| Ferrocenyl                                         | -0.1153                            | -0.107427                  | 282.1                       | -6.87              |
| 4-Cl-C <sub>6</sub> H <sub>4</sub>                 | -0.1243                            | -0.114182                  | 299.8                       | -4.92              |

## References

1. B. L. Feringa, *Acc. Chem. Res.*, 2000, **33**, 346-353.
2. C. Harabaiju, J. L. Hann, L. C. Murfin, G. Kociok-Köhn and S. E. Lewis, *Org. Biomol. Chem.*, 2023, **21**, 858-866.
3. A. Alexakis, C. Benhaim, S. Rosset and M. Humam, *J. Am. Chem. Soc.*, 2002, **124**, 5262-5263.
4. M. Sasaki, M. Nakamura, T. Uriu, H. Takekuma, T. Minematsu, M. Yoshihara and S.-i. Takekuma, *Tetrahedron*, 2003, **59**, 505-516.
5. S.-i. Takekuma, M. Tamura, T. Minematsu and H. Takekuma, *Tetrahedron*, 2007, **63**, 12058-12070.
6. T. Farrell, T. Meyer-Friedrichsen, M. Malessa, D. Haase, W. Saak, I. Asselberghs, K. Wostyn, K. Clays, A. Persoons, J. Heck and A. R. Manning, *J. Chem. Soc., Dalton Trans.*, 2001, 29-36.
7. H. Mayr and M. Patz, *Angew. Chem. Int. Ed. Engl.*, 1994, **33**, 938-957.
8. H. Mayr, T. Bug, M. F. Gotta, N. Hering, B. Irrgang, B. Janker, B. Kempf, R. Loos, A. R. Ofial, G. Remennikov and H. Schimmel, *J. Am. Chem. Soc.*, 2001, **123**, 9500-9512.
9. (a) TURBOMOLE V7.7, TURBOMOLE GmbH, Karlsruhe, ; (b) S. G. Balasubramani, G. P. Chen, S. Coriani, M. Diedenhofen, M. S. Frank, Y. J. Franzke, F. Furche, R. Grotjahn, M. E. Harding, C. Hättig, A. Hellweg, B. Helmich-Paris, C. Holzer, U. Huniar, M. Kaupp, A. Marefat Khah, S. Karbalaeei Khani, T. Müller, F. Mack, B. D. Nguyen, S. M. Parker, E. Perlt, D. Rappoport, K.

- Reiter, S. Roy, M. Rückert, G. Schmitz, M. Sierka, E. Tapavicza, D. P. Tew, C. van Wüllen, V. K. Voora, F. Weigend, A. Wodyński and J. M. Yu, *J. Chem. Phys.*, 2020, **152**, 184107.
10. S. Grimme, J. G. Brandenburg, C. Bannwarth and A. Hansen, *J. Chem. Phys.*, 2015, **143**, 054107.
  11. A. Schäfer, H. Horn and R. Ahlrichs, *J. Chem. Phys.*, 1992, **97**, 2571-2577.
  12. C. Adamo and V. Barone, *J. Chem. Phys.*, 1999, **110**, 6158-6170.
  13. E. Caldeweyher, S. Ehlert, A. Hansen, H. Neugebauer, S. Spicher, C. Bannwarth and S. Grimme, *J. Chem. Phys.*, 2019, **150**.
  14. F. Weigend and R. Ahlrichs, *Phys. Chem. Chem. Phys.*, 2005, **7**, 3297-3305.
  15. A. Klamt and G. Schüürmann, *J. Chem. Soc., Perkin Trans. 2*, 1993, 799-805.
  16. A. Mood, M. Tavakoli, E. Gutman, D. Kadish, P. Baldi and D. L. Van Vranken, *J. Org. Chem.*, 2020, **85**, 4096-4102.
